# Supplementary material for: Assessing the efficiency of changes in land use for mitigating climate change
Source: Springer Nature journal article supplement (doi:10.1038/s41586-018-0757-z), 2018-12-01
Supplement: 41586_2018_757_MOESM2_ESM.xlsx [file 41586_2018_757_MOESM2_ESM.xlsx]

## Sheet: 1 Change in Use Calc
							Change in Use Calculator
		Carbon Benefit of Existing Uses & Management
		Crops & biofuel feed by-products
		Select Output Type	Weight Type for all variables	Yield (output t/ha/yr)	Carbon Opportunity Cost (COC)					Production emissions savings or increases				Total carbon benefits of crop outputs (t CO2eq/ha/yr)
					COC/unit (kgCO2eq/ kg output) (Default with 4% discount but user can use alternative COCs.)	Alternative COC/unit (kg CO2eq/ kg output)	COC/unit (kg CO2eq/kg output) chosen		Total COC of each food or fiber (t CO2eq /ha)	Global mean PEM/output (kgCO2eq/ kg output/yr)	Selection of default of site-specific PEMs	Site production emissions (from worksheet 3.1) (kg CO2eq/ kg output)	PEM saving or increase (t CO2eq/ha)
		Maize grains	Fresh matter (FM)		2.11233	2.11233	Default COC	2.11233	0	0.461801	Default PEM	0	0	0
		Maize grains	Fresh matter (FM)		2.11233	2.11233	Default COC	2.11233	0	0.461801	Default PEM	0	0	0
		Maize grains	Fresh matter (FM)		2.11233	2.11233	Default COC	2.11233	0	0.461801	Default PEM	0	0	0
													Total	0
		Livestock
		Select Output Type	Yield (kg of product FM/ha/yr)	Carbon Opportunity Cost (COC)							Production emissions savings or increases				Total carbon benefits of livestock outputs (t CO2eq/ha/yr)
				Default COC per unit output FM (kg CO2eq/ kg product FM with 4% discounting)	Estimated COC from purchased feeds per unit output (kg CO2eq/ kg product FM)	Default COC per unit output minus estimated COC from purchased feeds per unit output (kg CO2eq/ kg product FM) with 4% discounting	Alternative COC per unit output minus estimated COC from purchased feeds per unit output (kg CO2eq/ kg product FM)	COC/kg product (kgCO2eq/kg product FM) chosen		Total COC (kg CO2eq/ha)	Global mean PEM/output (kg CO2eq/ kg output FM)	Selection of default of site-specific PEMs	Site Production emissions (kg CO2eq/ kg output FM) (from worksheet 3.3)	PEM saving or increase (kg CO2eq/ha)
		Beef		143.916	0	143.916	143.916	Default COC	143.916	0	44.2352	Default PEM	0	0	0
		Beef		143.916	0	143.916	143.916	Default COC	143.916	0	44.2352	Default PEM	0	0	0
		Beef		143.916	0	143.916	143.916	Default COC	143.916	0	44.2352	Default PEM	0	0	0
														Total:	0
		Bioenergy
		Output Type		Quantity of food or energy crop per hectare devoted to bioenergy (t/ha/yr)	Net Emissions savings from displaced fossil use and production (from worksheet 4) (kg CO2eq/ kg crop)	Total gross bioenergy savings (t CO2eq/ha/yr)
		Anhydrous fuel ethanol (cane-based)			0.522846	0
		Carbon Stock
		Carbon stock change from worksheet 5
		Change in carbon stock per year (t CO2eq/ha/yr)	0
		Total Carbon Benefit per Year of Existing Uses and Management (t CO2eq/ha/yr)	0
		Carbon Benefit of Proposed New Uses & Management
		Crops
		Select Output Type	Weight Type	Yield (output t/ha/yr)	Carbon Opportunity Cost (COC)					Production emissions savings or increases				Total carbon benefits of crop outputs (t CO2eq/ha/yr)
					COC/unit (kgCO2/ kg output) (Default with 4% discount but user can use alternative COCs.)	Alternative COC/unit (kg CO2/kg output)	COC/unit (kg CO2/kg output) chosen		Total COC of each food or fiber (t CO2eq/ha)	Global mean PEM/output (kgCO2eq/ kg output)	Selection of default of site-specific PEMs	Site production emissions (from worksheet 3.2) (kg CO2eq/ kg output)	PEM saving or increase (t CO2eq/ha)
		Maize grains	Fresh matter (FM)		2.11233	2.11233	Default COC	2.11233	0	0.461801	Default PEM	0	0	0
		Maize grains	Fresh matter (FM)		2.11233	2.11233	Default COC	2.11233	0	0.461801	Default PEM	0	0	0
		Maize grains	Fresh matter (FM)		2.11233	2.11233	Default COC	2.11233	0	0.461801	Default PEM	0	0	0
													Total:	0
		Livestock
		Select Output Type	Yield (kg of product FM/ ha/yr)	Carbon Opportunity Cost (COC)							Production emissions savings or increases				Total carbon benefits of livestock outputs (t CO2eq/ha/yr)
				Default COC per unit output FM (kg CO2eq/kg product FM with 4% discounting)	Estimated COC from purchased feeds per unit output (kg CO2eq/ kg product FM)	Default COC per unit output minus estimated COC from purchased feeds per unit output (kg CO2eq/kg product FM) with 4% discounting	Alternative COC per unit output minus estimated COC from purchased feeds per unit output (kg CO2eq/ kg product FM)	COC/kg product (kgCO2eq/kg product FM) chosen		Total COC (kg CO2eq/ha)	Global mean PEM/output (kg CO2eq/ kg output FM)	Selection of default of site-specific PEMs	Site Production emissions (from worksheet 3.4) (kg CO2eq/ kg output FM)	PEM saving or increase (kg CO2eq/ha)
		Beef		143.916	0	143.916	143.916	Default COC	143.916	0	44.2352	Default PEM	0	0	0
		Beef		143.916	0	143.916	143.916	Default COC	143.916	0	44.2352	Default PEM	0	0	0
		Beef		143.916	0	143.916	143.916	Default COC	143.916	0	44.2352	Default PEM	0	0	0
														Total:	0
		Bioenergy
		Output Type		Quantity of food or energy crop per hectare devoted to bioenergy (t/ha/yr)	Net Emissions savings from displaced fossil use and production (kg CO2eq/ kg crop)	Total gross bioenergy savings (t CO2eq/ha/yr)
		Anhydrous fuel ethanol (maize-based)			0.319926	0
		Carbon Stock
		Carbon stock change from worksheet 5
		Method selected to calculated carbon stock changes	Change in carbon stocks per year (t CO2eq/ha/yr)
		Calculator for carbon stock changes from user-provided data.	0
		Total Carbon Benefit per Year of New Uses and Management (t CO2eq/ha/yr)	0
		Net Benefit of Adopting Proposed New Uses & Management
		Net benefit per year (t CO2eq/ha/yr)	0

## Sheet: 2 Global Avg COC & PEM
	Default 4% Discounting																								1% Discounting																								2% Discounting
Output Type	Carbon loss method						Carbon gain method		Avg of Carbon Loss & Carbon Gain		Potential Sensitivity Adjustment or Adjustents for Use as Predictor of ILUC/Leakage (values in L,M,N, 0 of 1, 0, 0, 1 would produce results identical to default)				COC Adjusted (only use if you make adjustments in columns L-0)						Default Production Emissions		Discount rates of 1, 2, 3, 5, 6, 7, 8, 9, and 10 percent to the right.		Output Type	Carbon loss method						Carbon gain method		Avg of Carbon Loss & Carbon Gain		Potential Sensitivity Adjustment or Adjustents for Use as Predictor of ILUC/Leakage (values in L,M,N, 0 of 1, 0, 0, 1 would produce results identical to default)				COC Adjusted (only use if you make adjustments in columns L-0)						Production Emissions			Output Type
	Additional carbon lost				Total																					Additional carbon lost				Total
	Forest & soils		Organic soils																		All gases/sources					Forest & soils		Organic soils																		All gases/sources
	kg CO2/ kg fresh weight	kg CO2/ kg DM	kg CO2 eq/ kg fresh weight	kg CO2 eq/ kg DM	kg CO2 eq/kg fresh weight	kg CO2eq/kg DM	kg CO2/ kg fresh weight	kg CO2/ kg DM	kg CO2/ kg fresh weight	kg CO2/ kg DM	Sensitivity: Fraction of COC	% Crop area not replaced due to reduced consumption	% of Replacement crops attributed to intensification	% of carbon loss/yield ratio on replacement land of global avg. carbon loss/yield ratio	Carbon loss Fresh	Carbon loss DM	Carbon gain Fresh	Carbon gain DM	Average Fresh	Average DM	kg CO2 eq/ kg fresh weight	kg CO2 eq/ kg DM				kg CO2/ kg fresh weight	kg CO2/ kg DM	kg CO2 eq/ kg fresh weight	kg CO2 eq/ kg DM	kg CO2 eq./kg fresh weight	kg CO2eq/kg DM	kg CO2/ kg fresh weight	kg CO2/ kg DM	kg CO2/ kg fresh weight	kg CO2/ kg DM	Sensitivity: Fraction of COC	% Crop area not replaced due to reduced consumption	% of Replace-ment crops attributed to inten-sification	% of carbon loss/yield ratio on replacement land of global avg. carbon loss/yield ratio	Carbon loss Fresh	Carbon loss DM	Carbon gain Fresh	Carbon gain DM	Average Fresh	Average DM	kg CO2 eq/ kg fresh weight	kg CO2 eq/ kg DM
CEREAL CROPS																									CEREAL CROPS																								CEREAL CROPS
Maize grains	2.00133	2.27424	0.111006	0.126143	2.11233	2.40038	2.3172	2.63318	2.21477	2.51678	1	0	0	1	2.11233	2.40038	2.3172	2.63318	2.21477	2.51678	0.461801	0.524774			Maize grains	0.914024	1.03866	0.111006	0.126143	1.02503	1.16481	1.81881	2.06683	1.42192	1.61582	1	0	0	1	1.02503	1.16481	1.81881	2.06683	1.42192	1.61582	0.461801	0.524774		Maize grains
Rice grains (rough)	2.36514	2.71855	0.243635	0.28004	2.60878	2.99859	2.19589	2.52401	2.40233	2.7613	1	0	0	1	2.60878	2.99859	2.19589	2.52401	2.40233	2.7613	2.17409	2.49896			Rice grains (rough)	1.05378	1.21124	0.243635	0.28004	1.29742	1.49128	1.72359	1.98114	1.5105	1.73621	1	0	0	1	1.29742	1.49128	1.72359	1.98114	1.5105	1.73621	2.17409	2.49896		Rice grains (rough)
Wheat grains	1.7855	2.02897	0.112028	0.127304	1.89752	2.15628	2.53576	2.88155	2.21664	2.51891	1	0	0	1	1.89752	2.15628	2.53576	2.88155	2.21664	2.51891	0.688537	0.782428			Wheat grains	0.837483	0.951686	0.112028	0.127304	0.949511	1.07899	1.99036	2.26178	1.46994	1.67038	1	0	0	1	0.949511	1.07899	1.99036	2.26178	1.46994	1.67038	0.688537	0.782428		Wheat grains
Barley grains	2.35888	2.68055	0.210938	0.239702	2.56982	2.92025	3.28346	3.7312	2.92664	3.32572	1	0	0	1	2.56982	2.92025	3.28346	3.7312	2.92664	3.32572	0.516841	0.587319			Barley grains	1.10767	1.25872	0.210938	0.239702	1.31861	1.49842	2.57724	2.92868	1.94793	2.21355	1	0	0	1	1.31861	1.49842	2.57724	2.92868	1.94793	2.21355	0.516841	0.587319		Barley grains
Sorghum grains	3.98863	4.53254	0.433821	0.492979	4.42245	5.02552	6.7637	7.68603	5.59308	6.35577	1	0	0	1	4.42245	5.02552	6.7637	7.68603	5.59308	6.35577	0.427797	0.486133			Sorghum grains	1.78484	2.02823	0.433821	0.492979	2.21866	2.52121	5.30895	6.0329	3.76381	4.27705	1	0	0	1	2.21866	2.52121	5.30895	6.0329	3.76381	4.27705	0.427797	0.486133		Sorghum grains
Millet grains	3.90173	4.43379	0.949721	1.07923	4.85145	5.51302	7.23538	8.22202	6.04342	6.86752	1	0	0	1	4.85145	5.51302	7.23538	8.22202	6.04342	6.86752	0.542244	0.616186			Millet grains	1.74741	1.98569	0.949721	1.07923	2.69713	3.06492	5.67918	6.45361	4.18815	4.75926	1	0	0	1	2.69713	3.06492	5.67918	6.45361	4.18815	4.75926	0.542244	0.616186		Millet grains
STARCHY ROOTS																									STARCHY ROOTS																								STARCHY ROOTS
Cassava tubers	1.50292	4.29406	0.162838	0.465251	1.66576	4.75931	1.33245	3.80699	1.4991	4.28315	1	0	0	1	1.66576	4.75931	1.33245	3.80699	1.4991	4.28315	0.0408308	0.116659			Cassava tubers	0.66868	1.91051	0.162838	0.465251	0.831518	2.37577	1.04586	2.98817	0.938689	2.68197	1	0	0	1	0.831518	2.37577	1.04586	2.98817	0.938689	2.68197	0.0408308	0.116659		Cassava tubers
White potato tubers	0.590466	2.81175	0.0341188	0.162471	0.624585	2.97422	0.598201	2.84857	0.611393	2.9114	1	0	0	1	0.624585	2.97422	0.598201	2.84857	0.611393	2.9114	0.0890553	0.424073			White potato tubers	0.275312	1.31101	0.0341188	0.162471	0.309431	1.47348	0.469538	2.2359	0.389485	1.85469	1	0	0	1	0.309431	1.47348	0.469538	2.2359	0.389485	1.85469	0.0890553	0.424073		White potato tubers
Sweet potato tubers	1.15717	3.99024	0.0636345	0.219429	1.22081	4.20967	0.928546	3.20188	1.07468	3.70578	1	0	0	1	1.22081	4.20967	0.928546	3.20188	1.07468	3.70578	0.078177	0.269576			Sweet potato tubers	0.537071	1.85197	0.0636345	0.219429	0.600705	2.0714	0.728832	2.51321	0.664769	2.29231	1	0	0	1	0.600705	2.0714	0.728832	2.51321	0.664769	2.29231	0.078177	0.269576		Sweet potato tubers
Yam tubers	1.35045	4.5015	0.164631	0.548771	1.51508	5.05027	1.22419	4.08064	1.36964	4.56545	1	0	0	1	1.51508	5.05027	1.22419	4.08064	1.36964	4.56545	0.0214114	0.0713713			Yam tubers	0.597522	1.99174	0.164631	0.548771	0.762153	2.54051	0.96089	3.20297	0.861521	2.87174	1	0	0	1	0.762153	2.54051	0.96089	3.20297	0.861521	2.87174	0.0214114	0.0713713		Yam tubers
SUGAR CROPS																									SUGAR CROPS																								SUGAR CROPS
Sugar cane stems	0.185542	0.687194	0.0179409	0.0664477	0.203483	0.753642	0.19934	0.738296	0.201412	0.745969	1	0	0	1	0.203483	0.753642	0.19934	0.738296	0.201412	0.745969	0.0360261	0.13343			Sugar cane stems	0.0847479	0.313881	0.0179409	0.0664477	0.102689	0.380329	0.156465	0.579501	0.129577	0.479915	1	0	0	1	0.102689	0.380329	0.156465	0.579501	0.129577	0.479915	0.0360261	0.13343		Sugar cane stems
Sugar beet roots	0.174329	0.726372	0.0124393	0.0518305	0.186769	0.778203	0.20461	0.852543	0.19569	0.815373	1	0	0	1	0.186769	0.778203	0.20461	0.852543	0.19569	0.815373	0.0594009	0.247504			Sugar beet roots	0.0824621	0.343592	0.0124393	0.0518305	0.0949014	0.395423	0.160602	0.669176	0.127752	0.532299	1	0	0	1	0.0949014	0.395423	0.160602	0.669176	0.127752	0.532299	0.0594009	0.247504		Sugar beet roots
OIL CROPS																									OIL CROPS																								OIL CROPS
Soybean seeds	5.6874	6.24989	0.165907	0.182315	5.85331	6.4322	5.30024	5.82444	5.57677	6.12832	1	0	0	1	5.85331	6.4322	5.30024	5.82444	5.57677	6.12832	0.260762	0.286552			Soybean seeds	2.66632	2.93002	0.165907	0.182315	2.83222	3.11233	4.16025	4.57171	3.49624	3.84202	1	0	0	1	2.83222	3.11233	4.16025	4.57171	3.49624	3.84202	0.260762	0.286552		Soybean seeds
Oil palm fruit bunches	1.6381	3.1502	0.535431	1.02967	2.17353	4.17987	1.27784	2.45739	1.72569	3.31863	1	0	0	1	2.17353	4.17987	1.27784	2.45739	1.72569	3.31863	0.0838935	0.161334			Oil palm fruit bunches	0.740461	1.42396	0.535431	1.02967	1.27589	2.45364	1.003	1.92885	1.13945	2.19124	1	0	0	1	1.27589	2.45364	1.003	1.92885	1.13945	2.19124	0.0838935	0.161334		Oil palm fruit bunches
Canola seeds	5.21002	5.66306	0.61042	0.6635	5.82044	6.32656	5.0026	5.43761	5.41152	5.88209	1	0	0	1	5.82044	6.32656	5.0026	5.43761	5.41152	5.88209	1.00441	1.09175			Canola seeds	2.45093	2.66406	0.61042	0.6635	3.06135	3.32755	3.92663	4.26807	3.49399	3.79781	1	0	0	1	3.06135	3.32755	3.92663	4.26807	3.49399	3.79781	1.00441	1.09175		Canola seeds
Sunflower kernels	4.7443	5.15685	0.151337	0.164497	4.89563	5.32134	7.15402	7.77611	6.02483	6.54873	1	0	0	1	4.89563	5.32134	7.15402	7.77611	6.02483	6.54873	0.753535	0.81906			Sunflower kernels	2.20244	2.39395	0.151337	0.164497	2.35377	2.55845	5.61532	6.10361	3.98455	4.33103	1	0	0	1	2.35377	2.55845	5.61532	6.10361	3.98455	4.33103	0.753535	0.81906		Sunflower kernels
Groundnut pods	5.58586	6.07159	0.379266	0.412246	5.96513	6.48384	6.8097	7.40185	6.38742	6.94284	1	0	0	1	5.96513	6.48384	6.8097	7.40185	6.38742	6.94284	0.315676	0.343127			Groundnut pods	2.52815	2.74799	0.379266	0.412246	2.90741	3.16023	5.34506	5.80984	4.12624	4.48504	1	0	0	1	2.90741	3.16023	5.34506	5.80984	4.12624	4.48504	0.315676	0.343127		Groundnut pods
Coconuts	2.35263	5.11442	0.477115	1.03721	2.82975	6.15162	3.52902	7.67179	3.17939	6.91171	1	0	0	1	2.82975	6.15162	3.52902	7.67179	3.17939	6.91171	0.111613	0.242637			Coconuts	1.14606	2.49143	0.477115	1.03721	1.62317	3.52864	2.76999	6.02172	2.19658	4.77518	1	0	0	1	1.62317	3.52864	2.76999	6.02172	2.19658	4.77518	0.111613	0.242637		Coconuts
PULSES																									PULSES																								PULSES
Common beans	13.6395	15.1549	0.555511	0.617234	14.195	15.7722	15.2616	16.9574	14.7283	16.3648	1	0	0	1	14.195	15.7722	15.2616	16.9574	14.7283	16.3648	0.63	0.7			Common beans	6.12661	6.80735	0.555511	0.617234	6.68212	7.42458	11.9791	13.3101	9.33062	10.3674	1	0	0	1	6.68212	7.42458	11.9791	13.3101	9.33062	10.3674	0.63	0.7		Common beans
Chickpeas	3.71594	4.08345	0	0	3.71594	4.08345	9.0739	9.97132	6.39492	7.02739	1	0	0	1	3.71594	4.08345	9.0739	9.97132	6.39492	7.02739	0.477004	0.52418			Chickpeas	1.67699	1.84285	0	0	1.67699	1.84285	7.12227	7.82667	4.39963	4.83476	1	0	0	1	1.67699	1.84285	7.12227	7.82667	4.39963	4.83476	0.477004	0.52418		Chickpeas
Cowpeas	10.5998	12.0452	2.47116	2.80813	13.0709	14.8533	18.2907	20.7849	15.6808	17.8191	1	0	0	1	13.0709	14.8533	18.2907	20.7849	15.6808	17.8191	0.477004	0.54205			Cowpeas	4.70024	5.34118	2.47116	2.80813	7.17139	8.14931	14.3567	16.3144	10.764	12.2319	1	0	0	1	7.17139	8.14931	14.3567	16.3144	10.764	12.2319	0.477004	0.54205		Cowpeas
Pigeon peas	7.48008	8.40459	0	0	7.48008	8.40459	14.243	16.0033	10.8615	12.204	1	0	0	1	7.48008	8.40459	14.243	16.0033	10.8615	12.204	0.477004	0.53596			Pigeon peas	3.32947	3.74098	0	0	3.32947	3.74098	11.1795	12.5613	7.25451	8.15113	1	0	0	1	3.32947	3.74098	11.1795	12.5613	7.25451	8.15113	0.477004	0.53596		Pigeon peas
Lentils	5.19314	5.77015	0.669332	0.743702	5.86247	6.51385	9.34123	10.3791	7.60185	8.4465	1	0	0	1	5.86247	6.51385	9.34123	10.3791	7.60185	8.4465	0.477004	0.530005			Lentils	2.36302	2.62557	0.669332	0.743702	3.03235	3.36928	7.33209	8.14677	5.18222	5.75802	1	0	0	1	3.03235	3.36928	7.33209	8.14677	5.18222	5.75802	0.477004	0.530005		Lentils
FRUITS AND VEGETABLES																									FRUITS AND VEGETABLES																								FRUITS AND VEGETABLES
Bananas	1.04111	4.16445	0.101562	0.406247	1.14267	4.5707	0.904666	3.61866	1.02367	4.09468	1	0	0	1	1.14267	4.5707	0.904666	3.61866	1.02367	4.09468	0.0793772	0.317509			Bananas	0.467079	1.86831	0.101562	0.406247	0.56864	2.27456	0.710088	2.84035	0.639364	2.55746	1	0	0	1	0.56864	2.27456	0.710088	2.84035	0.639364	2.55746	0.0793772	0.317509		Bananas
Plantains	2.86372	8.18206	0.213673	0.610495	3.07739	8.79256	2.26906	6.48303	2.67323	7.63779	1	0	0	1	3.07739	8.79256	2.26906	6.48303	2.67323	7.63779	0.0953447	0.272414			Plantains	1.27992	3.6569	0.213673	0.610495	1.49359	4.2674	1.78103	5.08864	1.63731	4.67802	1	0	0	1	1.49359	4.2674	1.78103	5.08864	1.63731	4.67802	0.0953447	0.272414		Plantains
Other fruit - temperate	0.901799	5.01	0.0336394	0.186885	0.935439	5.19688	1.05758	5.87542	0.996507	5.53615	1	0	0	1	0.935439	5.19688	1.05758	5.87542	0.996507	5.53615	0.227927	1.26626			Other fruit - temperate	0.422236	2.34575	0.0336394	0.186885	0.455875	2.53264	0.83011	4.61172	0.642992	3.57218	1	0	0	1	0.455875	2.53264	0.83011	4.61172	0.642992	3.57218	0.227927	1.26626		Other fruit - temperate
Other fruit - tropical	0.933156	5.1842	0.0690328	0.383516	1.00219	5.56771	0.866254	4.81252	0.934222	5.19012	1	0	0	1	1.00219	5.56771	0.866254	4.81252	0.934222	5.19012	0.0740049	0.411138			Other fruit - tropical	0.42789	2.37717	0.0690328	0.383516	0.496923	2.76068	0.679938	3.77744	0.588431	3.26906	1	0	0	1	0.496923	2.76068	0.679938	3.77744	0.588431	3.26906	0.0740049	0.411138		Other fruit - tropical
Vegetables (all)	0.675653	8.44566	0.0313238	0.391548	0.706977	8.83721	0.635172	7.93965	0.671074	8.38843	1	0	0	1	0.706977	8.83721	0.635172	7.93965	0.671074	8.38843	0.203987	2.5			Vegetables (all)	0.314553	3.93191	0.0313238	0.391548	0.345877	4.32346	0.498558	6.23197	0.422217	5.27772	1	0	0	1	0.345877	4.32346	0.498558	6.23197	0.422217	5.27772	0.203987	2.5		Vegetables (all)
OTHER CROPS																									OTHER CROPS																								OTHER CROPS
Coffee beans (green)	29.4146	32.6829	1.71386	1.90429	31.1285	34.5872	24.8529	27.6143	27.9907	31.1007	1	0	0	1	31.1285	34.5872	24.8529	27.6143	27.9907	31.1007	1.21	1.35			Coffee beans (green)	13.2073	14.6748	1.71386	1.90429	14.9212	16.5791	19.5075	21.6749	17.2143	19.127	1	0	0	1	14.9212	16.5791	19.5075	21.6749	17.2143	19.127	1.21	1.35		Coffee beans (green)
Tea leaves (dried)	14.6034	16.226	0.301395	0.334884	14.9048	16.5609	11.0216	12.2462	12.9632	14.4036	1	0	0	1	14.9048	16.5609	11.0216	12.2462	12.9632	14.4036	0.962608	1.06956			Tea leaves (dried)	6.77766	7.53073	0.301395	0.334884	7.07906	7.86562	8.65105	9.61227	7.86505	8.73895	1	0	0	1	7.07906	7.86562	8.65105	9.61227	7.86505	8.73895	0.962608	1.06956		Tea leaves (dried)
Cocoa beans (dried)	38.5021	41.8501	1.8616	2.02348	40.3637	43.8736	34.4148	37.4074	37.3892	40.6405	1	0	0	1	40.3637	43.8736	34.4148	37.4074	37.3892	40.6405	0.683009	0.742401			Cocoa beans (dried)	17.1547	18.6464	1.8616	2.02348	19.0163	20.6699	27.0128	29.3617	23.0146	25.0158	1	0	0	1	19.0163	20.6699	27.0128	29.3617	23.0146	25.0158	0.683009	0.742401		Cocoa beans (dried)
Seed cotton	2.7782	3.05297	0.0843357	0.0926766	2.86254	3.14565	3.93342	4.32244	3.39798	3.73404	1	0	0	1	2.86254	3.14565	3.93342	4.32244	3.39798	3.73404	1.12362	1.23475			Seed cotton	1.26384	1.38883	0.0843357	0.0926766	1.34817	1.48151	3.08741	3.39276	2.21779	2.43713	1	0	0	1	1.34817	1.48151	3.08741	3.39276	2.21779	2.43713	1.12362	1.23475		Seed cotton
EDIBLE CEREAL (C0-)PRODUCTS																									EDIBLE CEREAL (C0-)PRODUCTS																								EDIBLE CEREAL (C0-)PRODUCTS
Maize grits, meal & flour	1.88924	2.17154	0.104789	0.120447	1.99403	2.29198	2.18742	2.51428	2.09072	2.40313	1	0	0	1	1.99403	2.29198	2.18742	2.51428	2.09072	2.40313	0.435937	0.501077			Maize grits, meal & flour	0.862831	0.99176	0.104789	0.120447	0.96762	1.11221	1.71694	1.9735	1.34228	1.54285	1	0	0	1	0.96762	1.11221	1.71694	1.9735	1.34228	1.54285	0.435937	0.501077		Maize grits, meal & flour
White rice	2.96162	3.36547	0.305078	0.346679	3.26669	3.71215	2.74968	3.12463	3.00818	3.41839	1	0	0	1	3.26669	3.71215	2.74968	3.12463	3.00818	3.41839	2.72238	3.09362			White rice	1.31954	1.49948	0.305078	0.346679	1.62462	1.84616	2.15827	2.45258	1.89144	2.14937	1	0	0	1	1.62462	1.84616	2.15827	2.45258	1.89144	2.14937	2.72238	3.09362		White rice
Wheat straight flour	1.74111	2.02455	0.109243	0.127027	1.85035	2.15157	2.47272	2.87526	2.16154	2.51342	1	0	0	1	1.85035	2.15157	2.47272	2.87526	2.16154	2.51342	0.67142	0.780721			Wheat straight flour	0.816665	0.94961	0.109243	0.127027	0.925907	1.07664	1.94089	2.25684	1.4334	1.66674	1	0	0	1	0.925907	1.07664	1.94089	2.25684	1.4334	1.66674	0.67142	0.780721		Wheat straight flour
EDIBLE SUGAR (C0-)PRODUCTS																									EDIBLE SUGAR (C0-)PRODUCTS																								EDIBLE SUGAR (C0-)PRODUCTS
Cane white sugar	1.69737	1.69737	0.164126	0.164126	1.8615	1.8615	1.8236	1.8236	1.84255	1.84255	1	0	0	1	1.8615	1.8615	1.8236	1.8236	1.84255	1.84255	0.270293	0.270293			Cane white sugar	0.775288	0.775288	0.164126	0.164126	0.939415	0.939415	1.43137	1.43137	1.18539	1.18539	1	0	0	1	0.939415	0.939415	1.43137	1.43137	1.18539	1.18539	0.270293	0.270293		Cane white sugar
Beet white sugar	0.831633	0.831633	0.0593414	0.0593414	0.890975	0.890975	0.976088	0.976088	0.933531	0.933531	1	0	0	1	0.890975	0.890975	0.976088	0.976088	0.933531	0.933531	0.283371	0.283371			Beet white sugar	0.393383	0.393383	0.0593414	0.0593414	0.452725	0.452725	0.766149	0.766149	0.609437	0.609437	1	0	0	1	0.452725	0.452725	0.766149	0.766149	0.609437	0.609437	0.283371	0.283371		Beet white sugar
EDIBLE VETEGABLE OIL (C0-)PRODUCTS																									EDIBLE VETEGABLE OIL (C0-)PRODUCTS																								EDIBLE VETEGABLE OIL (C0-)PRODUCTS
Soybean oil	10.4698	10.4698	0.305413	0.305413	10.7752	10.7752	9.75706	9.75706	10.2661	10.2661	1	0	0	1	10.7752	10.7752	9.75706	9.75706	10.2661	10.2661	0.754723	0.754723			Soybean oil	4.90834	4.90834	0.305413	0.305413	5.21376	5.21376	7.65849	7.65849	6.43612	6.43612	1	0	0	1	5.21376	5.21376	7.65849	7.65849	6.43612	6.43612	0.754723	0.754723		Soybean oil
Palm oil	6.99352	6.99352	2.2859	2.2859	9.27942	9.27942	5.45546	5.45546	7.36744	7.36744	1	0	0	1	9.27942	9.27942	5.45546	5.45546	7.36744	7.36744	1.76723	1.76723			Palm oil	3.16124	3.16124	2.2859	2.2859	5.44714	5.44714	4.28209	4.28209	4.86462	4.86462	1	0	0	1	5.44714	5.44714	4.28209	4.28209	4.86462	4.86462	1.76723	1.76723		Palm oil
Palm kernel oil	6.99352	6.99352	2.2859	2.2859	9.27942	9.27942	5.45546	5.45546	7.36744	7.36744	1	0	0	1	9.27942	9.27942	5.45546	5.45546	7.36744	7.36744	1.76723	1.76723			Palm kernel oil	3.16124	3.16124	2.2859	2.2859	5.44714	5.44714	4.28209	4.28209	4.86462	4.86462	1	0	0	1	5.44714	5.44714	4.28209	4.28209	4.86462	4.86462	1.76723	1.76723		Palm kernel oil
Canola oil	7.96787	7.96787	0.933536	0.933536	8.9014	8.9014	7.65065	7.65065	8.27603	8.27603	1	0	0	1	8.9014	8.9014	7.65065	7.65065	8.27603	8.27603	1.68462	1.68462			Canola oil	3.74829	3.74829	0.933536	0.933536	4.68183	4.68183	6.00513	6.00513	5.34348	5.34348	1	0	0	1	4.68183	4.68183	6.00513	6.00513	5.34348	5.34348	1.68462	1.68462		Canola oil
Sunflower oil	7.25562	7.25562	0.231445	0.231445	7.48707	7.48707	10.9409	10.9409	9.21398	9.21398	1	0	0	1	7.48707	7.48707	10.9409	10.9409	9.21398	9.21398	1.28206	1.28206			Sunflower oil	3.36827	3.36827	0.231445	0.231445	3.59971	3.59971	8.5877	8.5877	6.09371	6.09371	1	0	0	1	3.59971	3.59971	8.5877	8.5877	6.09371	6.09371	1.28206	1.28206		Sunflower oil
Groundnut oil	12.053	12.053	0.81837	0.81837	12.8714	12.8714	14.6938	14.6938	13.7826	13.7826	1	0	0	1	12.8714	12.8714	14.6938	14.6938	13.7826	13.7826	0.788236	0.788236			Groundnut oil	5.45516	5.45516	0.81837	0.81837	6.27353	6.27353	11.5334	11.5334	8.90347	8.90347	1	0	0	1	6.27353	6.27353	11.5334	11.5334	8.90347	8.90347	0.788236	0.788236		Groundnut oil
Maize oil	4.715	4.715	0.261523	0.261523	4.97652	4.97652	5.45917	5.45917	5.21785	5.21785	1	0	0	1	4.97652	4.97652	5.45917	5.45917	5.21785	5.21785	1.08797	1.08797			Maize oil	2.15338	2.15338	0.261523	0.261523	2.4149	2.4149	4.285	4.285	3.34995	3.34995	1	0	0	1	2.4149	2.4149	4.285	4.285	3.34995	3.34995	1.08797	1.08797		Maize oil
NON-EDIBLE CEREAL (C0-)PRODUCTS																									NON-EDIBLE CEREAL (C0-)PRODUCTS																								NON-EDIBLE CEREAL (C0-)PRODUCTS
Maize hominy feed	2.21353	2.45948	0.122776	0.136418	2.3363	2.59589	2.56289	2.84766	2.4496	2.72178	1	0	0	1	2.3363	2.59589	2.56289	2.84766	2.4496	2.72178	0.510766	0.567518			Maize hominy feed	1.01094	1.12326	0.122776	0.136418	1.13371	1.25968	2.01166	2.23518	1.57269	1.74743	1	0	0	1	1.13371	1.25968	2.01166	2.23518	1.57269	1.74743	0.510766	0.567518		Maize hominy feed
Rice bran (incl. germ)	3.33705	3.62723	0.343752	0.373643	3.6808	4.00087	3.09825	3.36766	3.38953	3.68427	1	0	0	1	3.6808	4.00087	3.09825	3.36766	3.38953	3.68427	3.06749	3.33423			Rice bran (incl. germ)	1.48681	1.6161	0.343752	0.373643	1.83057	1.98975	2.43187	2.64334	2.13122	2.31654	1	0	0	1	1.83057	1.98975	2.43187	2.64334	2.13122	2.31654	3.06749	3.33423		Rice bran (incl. germ)
Wheat mill run	1.82154	2.04667	0.114289	0.128415	1.93583	2.17509	2.58695	2.90668	2.26139	2.54089	1	0	0	1	1.93583	2.17509	2.58695	2.90668	2.26139	2.54089	0.702436	0.789254			Wheat mill run	0.854389	0.959988	0.114289	0.128415	0.968679	1.0884	2.03054	2.28151	1.49961	1.68496	1	0	0	1	0.968679	1.0884	2.03054	2.28151	1.49961	1.68496	0.702436	0.789254		Wheat mill run
NON-EDIBLE VEGETABLE OIL (C0-)PRODUCTS																									NON-EDIBLE VEGETABLE OIL (C0-)PRODUCTS																								NON-EDIBLE VEGETABLE OIL (C0-)PRODUCTS
Soybean meal	4.77933	5.19492	0.139417	0.151541	4.91874	5.34646	4.45399	4.84129	4.68637	5.09388	1	0	0	1	4.91874	5.34646	4.45399	4.84129	4.68637	5.09388	0.344523	0.374481			Soybean meal	2.2406	2.43544	0.139417	0.151541	2.38002	2.58698	3.49601	3.80001	2.93802	3.1935	1	0	0	1	2.38002	2.58698	3.49601	3.80001	2.93802	3.1935	0.344523	0.374481		Soybean meal
Palm kernel meal	3.27432	3.55904	1.07025	1.16331	4.34456	4.72235	2.55421	2.77632	3.44939	3.74933	1	0	0	1	4.34456	4.72235	2.55421	2.77632	3.44939	3.74933	0.827405	0.899353			Palm kernel meal	1.48007	1.60877	1.07025	1.16331	2.55032	2.77208	2.00485	2.17918	2.27758	2.47563	1	0	0	1	2.55032	2.77208	2.00485	2.17918	2.27758	2.47563	0.827405	0.899353		Palm kernel meal
Canola meal	3.54398	3.85215	0.415222	0.451328	3.9592	4.30348	3.40288	3.69879	3.68104	4.00113	1	0	0	1	3.9592	4.30348	3.40288	3.69879	3.68104	4.00113	0.74929	0.814446			Canola meal	1.66718	1.81215	0.415222	0.451328	2.0824	2.26348	2.67098	2.90324	2.37669	2.58336	1	0	0	1	2.0824	2.26348	2.67098	2.90324	2.37669	2.58336	0.74929	0.814446		Canola meal
Sunflower meal	3.22718	3.50781	0.102943	0.111894	3.33013	3.6197	4.86633	5.28949	4.09823	4.4546	1	0	0	1	3.33013	3.6197	4.86633	5.28949	4.09823	4.4546	0.570241	0.619827			Sunflower meal	1.49815	1.62842	0.102943	0.111894	1.60109	1.74032	3.81967	4.15182	2.71038	2.94607	1	0	0	1	1.60109	1.74032	3.81967	4.15182	2.71038	2.94607	0.570241	0.619827		Sunflower meal
Groundnut meal	5.9253	6.44054	0.402313	0.437297	6.32761	6.87784	7.22351	7.85164	6.77556	7.36474	1	0	0	1	6.32761	6.87784	7.22351	7.85164	6.77556	7.36474	0.387499	0.421195			Groundnut meal	2.68178	2.91497	0.402313	0.437297	3.08409	3.35227	5.66986	6.16289	4.37697	4.75758	1	0	0	1	3.08409	3.35227	5.66986	6.16289	4.37697	4.75758	0.387499	0.421195		Groundnut meal
NON-EDIBLE SUGAR (C0-)PRODUCTS																									NON-EDIBLE SUGAR (C0-)PRODUCTS																								NON-EDIBLE SUGAR (C0-)PRODUCTS
Cane molasses	1.08632	1.55189	0.105041	0.150058	1.19136	1.70194	1.1671	1.66729	1.17923	1.68462	1	0	0	1	1.19136	1.70194	1.1671	1.66729	1.17923	1.68462	0.172987	0.247125			Cane molasses	0.496185	0.708835	0.105041	0.150058	0.601225	0.858893	0.916078	1.30868	0.758652	1.08379	1	0	0	1	0.601225	0.858893	0.916078	1.30868	0.758652	1.08379	0.172987	0.247125		Cane molasses
Beet molasses	0.532245	0.760351	0.0379785	0.054255	0.570224	0.814606	0.624696	0.892423	0.59746	0.853514	1	0	0	1	0.570224	0.814606	0.624696	0.892423	0.59746	0.853514	0.181357	0.259082			Beet molasses	0.251765	0.359665	0.0379785	0.054255	0.289744	0.41392	0.490335	0.700479	0.390039	0.557199	1	0	0	1	0.289744	0.41392	0.490335	0.700479	0.390039	0.557199	0.181357	0.259082		Beet molasses
Beet pulp (dried)	0.74847	0.831633	0.0534073	0.0593414	0.801877	0.890975	0.878479	0.976088	0.840178	0.933531	1	0	0	1	0.801877	0.890975	0.878479	0.976088	0.840178	0.933531	0.255033	0.283371			Beet pulp (dried)	0.354045	0.393383	0.0534073	0.0593414	0.407452	0.452725	0.689534	0.766149	0.548493	0.609437	1	0	0	1	0.407452	0.452725	0.689534	0.766149	0.548493	0.609437	0.255033	0.283371		Beet pulp (dried)
RUMINANT MEAT																									RUMINANT MEAT																								RUMINANT MEAT
Beef	134.864	321.104	9.05247	21.5535	143.916	342.657	165.297	393.564	154.606	368.111	1	0	0	1	143.916	342.657	165.297	393.564	154.606	368.111	44.2352	105.322			Beef	61.9577	147.518	9.05247	21.5535	71.0101	169.072	129.744	308.915	100.377	238.993	1	0	0	1	71.0101	169.072	129.744	308.915	100.377	238.993	44.2352	105.322		Beef
Sheep/goat meat	174.358	425.263	11.3281	27.6296	185.686	452.893	212.805	519.036	199.245	485.964	1	0	0	1	185.686	452.893	212.805	519.036	199.245	485.964	42.0525	102.567			Sheep/goat meat	80.0087	195.143	11.3281	27.6296	91.3369	222.773	167.034	407.401	129.186	315.087	1	0	0	1	91.3369	222.773	167.034	407.401	129.186	315.087	42.0525	102.567		Sheep/goat meat
Large-rum. meat incl. dairy bulls (beef carcass)	143.047	340.588	9.59895	22.8546	152.646	363.443	175.394	417.604	164.02	390.523	1	0	0	1	152.646	363.443	175.394	417.604	164.02	390.523	46.1655	109.918			Large-rum. meat incl. dairy bulls (beef carcass)	65.7102	156.453	9.59895	22.8546	75.3092	179.308	137.67	327.785	106.489	253.546	1	0	0	1	75.3092	179.308	137.67	327.785	106.489	253.546	46.1655	109.918		Large-rum. meat incl. dairy bulls (beef carcass)
Small-ruminants meat (mutton, goat carcass)	177.679	433.363	11.5058	28.063	189.185	461.426	216.711	528.564	202.948	494.995	1	0	0	1	189.185	461.426	216.711	528.564	202.948	494.995	42.29	103.146			Small-ruminants meat (mutton, goat carcass)	81.5225	198.835	11.5058	28.063	93.0283	226.898	170.1	414.879	131.564	320.889	1	0	0	1	93.0283	226.898	170.1	414.879	131.564	320.889	42.29	103.146		Small-ruminants meat (mutton, goat carcass)
DAIRY																									DAIRY																								DAIRY
Cow milk	5.80426	46.0656	0.390901	3.10239	6.19517	49.168	7.08305	56.2147	6.63911	52.6913	1	0	0	1	6.19517	49.168	7.08305	56.2147	6.63911	52.6913	2.25256	17.8774			Cow milk	2.66976	21.1885	0.390901	3.10239	3.06066	24.2909	5.55961	44.1239	4.31013	34.2074	1	0	0	1	3.06066	24.2909	5.55961	44.1239	4.31013	34.2074	2.25256	17.8774		Cow milk
Sheep/goat milk	18.6272	124.182	1.22644	8.17625	19.8537	132.358	22.7973	151.982	21.3255	142.17	1	0	0	1	19.8537	132.358	22.7973	151.982	21.3255	142.17	4.7325	31.55			Sheep/goat milk	8.55198	57.0132	1.22644	8.17625	9.77842	65.1894	17.894	119.293	13.8362	92.2414	1	0	0	1	9.77842	65.1894	17.894	119.293	13.8362	92.2414	4.7325	31.55		Sheep/goat milk
Large dairy (unallocated)	6.79793	53.9519	0.457822	3.63351	7.25576	57.5854	8.29565	65.8385	7.7757	61.7119	1	0	0	1	7.25576	57.5854	8.29565	65.8385	7.7757	61.7119	2.63819	20.938			Large dairy (unallocated)	3.12681	24.8159	0.457822	3.63351	3.58463	28.4494	6.5114	51.6778	5.04801	40.0636	1	0	0	1	3.58463	28.4494	6.5114	51.6778	5.04801	40.0636	2.63819	20.938		Large dairy (unallocated)
Small dairy (unallocated)	33.1314	220.876	2.1814	14.5427	35.3128	235.419	40.5485	270.323	37.9306	252.871	1	0	0	1	35.3128	235.419	40.5485	270.323	37.9306	252.871	8.41746	56.1164			Small dairy (unallocated)	15.211	101.407	2.1814	14.5427	17.3924	115.949	31.8272	212.181	24.6098	164.065	1	0	0	1	17.3924	115.949	31.8272	212.181	24.6098	164.065	8.41746	56.1164		Small dairy (unallocated)
MONOGASTRIC PRODUCTS																									MONOGASTRIC PRODUCTS																								MONOGASTRIC PRODUCTS
Pork	13.5403	33.025	0.797767	1.94577	14.338	34.9708	15.0852	36.7931	14.7116	35.8819	1	0	0	1	14.338	34.9708	15.0852	36.7931	14.7116	35.8819	5.45813	13.3125			Pork	6.2491	15.2417	0.797767	1.94577	7.04687	17.1875	11.8406	28.8795	9.44374	23.0335	1	0	0	1	7.04687	17.1875	11.8406	28.8795	9.44374	23.0335	5.45813	13.3125		Pork
Poultry meat	10.1577	25.3942	0.528556	1.32139	10.6862	26.7156	11.4662	28.6656	11.0762	27.6906	1	0	0	1	10.6862	26.7156	11.4662	28.6656	11.0762	27.6906	3.72271	9.30677			Poultry meat	4.7046	11.7615	0.528556	1.32139	5.23316	13.0829	9.00006	22.5001	7.11661	17.7915	1	0	0	1	5.23316	13.0829	9.00006	22.5001	7.11661	17.7915	3.72271	9.30677		Poultry meat
Eggs	10.1347	31.6708	0.527358	1.64799	10.662	33.3188	11.4402	35.7508	11.0511	34.5348	1	0	0	1	10.662	33.3188	11.4402	35.7508	11.0511	34.5348	3.62132	11.3166			Eggs	4.69393	14.6685	0.527358	1.64799	5.22129	16.3165	8.97965	28.0614	7.10047	22.189	1	0	0	1	5.22129	16.3165	8.97965	28.0614	7.10047	22.189	3.62132	11.3166		Eggs
BEVERAGE ETHANOL																									BEVERAGE ETHANOL																								BEVERAGE ETHANOL
Hydrous ethanol (barley-based)	4.95702	5.16356	0.44327	0.46174	5.40029	5.6253	6.89995	7.18744	6.15012	6.40637	1	0	0	1	5.40029	5.6253	6.89995	7.18744	6.15012	6.40637	1.65969	1.72884			Hydrous ethanol (barley-based)	2.3277	2.42468	0.44327	0.46174	2.77097	2.88642	5.41589	5.64155	4.09343	4.26399	1	0	0	1	2.77097	2.88642	5.41589	5.64155	4.09343	4.26399	1.65969	1.72884		Hydrous ethanol (barley-based)
Brewers/distillers grains	3.10234	3.44704	0.27742	0.308244	3.37976	3.75529	4.31832	4.79813	3.84904	4.27671	1	0	0	1	3.37976	3.75529	4.31832	4.79813	3.84904	4.27671	1.03871	1.15412			Brewers/distillers grains	1.45678	1.61865	0.27742	0.308244	1.7342	1.92689	3.38952	3.76614	2.56186	2.84651	1	0	0	1	1.7342	1.92689	3.38952	3.76614	2.56186	2.84651	1.03871	1.15412		Brewers/distillers grains
NON-EDIBLE ETHANOL (C0-)PRODUCTS																									NON-EDIBLE ETHANOL (C0-)PRODUCTS																								NON-EDIBLE ETHANOL (C0-)PRODUCTS
Distillers grains (maize-ethanol)	2.54098	2.73224	0.1466	0.157635	2.68758	2.88988	3.37246	3.6263	3.03002	3.25809	1	0	0	1	2.68758	2.88988	3.37246	3.6263	3.03002	3.25809	0.533674	0.573843			Distillers grains (maize-ethanol)	1.17415	1.26253	0.1466	0.157635	1.32075	1.42016	2.6471	2.84635	1.98393	2.13326	1	0	0	1	1.32075	1.42016	2.6471	2.84635	1.98393	2.13326	0.533674	0.573843		Distillers grains (maize-ethanol)
Distillers grains (wheat-ethanol)	2.45902	2.73224	0.141871	0.157635	2.60089	2.88988	3.26367	3.6263	2.93228	3.25809	1	0	0	1	2.60089	2.88988	3.26367	3.6263	2.93228	3.25809	0.516458	0.573843			Distillers grains (wheat-ethanol)	1.13628	1.26253	0.141871	0.157635	1.27815	1.42016	2.56171	2.84635	1.91993	2.13326	1	0	0	1	1.27815	1.42016	2.56171	2.84635	1.91993	2.13326	0.516458	0.573843		Distillers grains (wheat-ethanol)
FEED																									FEED																								FEED
Grasses/legumes hay/silage		1.99		0.26		2.25		2.8836		2.5668	1	0	0	1		2.25		2.8836		2.5668		0.33			Grasses/legumes hay/silage		0.942655		0.26		1.20266		2.26339		1.73302	1	0	0	1		1.20266		2.26339		1.73302		0.33		Grasses/legumes hay/silage
Whole-maize silage		1.77		0.08		1.85		1.69287		1.77144	1	0	0	1		1.85		1.69287		1.77144		0.29			Whole-maize silage		0.837916		0.08		0.917916		1.32877		1.12334	1	0	0	1		0.917916		1.32877		1.12334		0.29		Whole-maize silage
Fresh grass (cut & carry)		1.592		0.208		1.8		2.30688		2.05344	1	0	0	1		1.8		2.30688		2.05344		0.26			Fresh grass (cut & carry)		0.754124		0.208		0.962124		1.81071		1.38642	1	0	0	1		0.962124		1.81071		1.38642		0.26		Fresh grass (cut & carry)
[truncated: 183 more columns]

## Sheet: 2a Purchased feeds COC
		Existing Uses & Management
		Livestock Product 1		Beef
			Calculating COCs of Purchased Feeds for Livestock Products
			Feed Type	COC (kg CO2eq/ kg output)	Quantity of feed purchased for livestock (kg/year)	Livestock output yield (kg product/ha/yr)	COC/kg animal product (kg CO2eq/kg output)
						0	0
						0	0
						0	0
						0	0
						0	0
						0	0
			Total				0
		Livestock Product 2		Beef
			Calculating COCs of Purchased Feeds for Livestock Products
			Feed Type	COC (kg CO2eq/ kg output)	Quantity of feed purchased for livestock (kg/year)	Livestock output yield (kg product/ha/yr)	COC/kg animal product (kg CO2eq/kg output)
						0	0
						0	0
						0	0
						0	0
						0	0
						0	0
			Total				0
		Livestock Product 3		Beef
			Calculating COCs of Purchased Feeds for Livestock Products
			Feed Type	COC (kg CO2eq/ kg output)	Quantity of feed purchased for livestock (kg/year)	Livestock output yield (kg product/ha/yr)	COC/kg animal product (kg CO2eq/kg output)
						0	0
						0	0
						0	0
						0	0
						0	0
						0	0
			Total				0
		New Uses & Management
		Livestock Product 1		Beef
			Calculating COCs of Purchased Feeds for Livestock Products
			Feed Type	COC (kg CO2eq/ kg output)	Quantity of feed purchased for livestock (kg/year)	Livestock output yield (kg product/ha/yr)	COC/kg animal product (kg CO2eq/kg output)
						0	0
						0	0
						0	0
						0	0
						0	0
						0	0
			Total				0
		Livestock Product 2		Beef
			Calculating COCs of Purchased Feeds for Livestock Products
			Feed Type	COC (kg CO2eq/ kg output)	Quantity of feed purchased for livestock (kg/year)	Livestock output yield (kg product/ha/yr)	COC/kg animal product (kg CO2eq/kg output)
						0	0
						0	0
						0	0
						0	0
						0	0
						0	0
			Total				0
		Livestock Product 3		Beef
			Calculating COCs of Purchased Feeds for Livestock Products
			Feed Type	COC (kg CO2eq/ kg output)	Quantity of feed purchased for livestock (kg/year)	Livestock output yield (kg product/ha/yr)	COC/kg animal product (kg CO2eq/kg output)
						0	0
						0	0
						0	0
						0	0
						0	0
						0	0
			Total				0

## Sheet: 3.1 Site PEMs Crops Existing LU
		Site-Specific Production Emissions (PEM) Calculator for Crop Products Under Existing Use & Management
		Crop product 1		Maize grains
		N20 from fertilization
		Output type		N20 default global average PEM per output (CO2eq/kg)	N20 Site-specific PEM per output (CO2eq/kg)													N20 PEM chosen (select default or site-specific) (kg CO2eq/kg)
					N20 Emission factor						Quantity of N inputs					Yield (t crop output/ha/yr)	N20 Site-specific PEM (kg CO2eq/ kg)
					N20 Default emission factor		N20 Site-specific emission factor		N20 emission factor chosen
					Emissions as % of fertilization input (N20-N/N)	CO2eq/N inputs (kg CO2eq/kg N inputs)	Emissions as % of fertilization input (N20-N/N)	In CO2eq/N inputs (kg CO2eq/kg N inputs)			Quantity N fertilizer per hectare (kg N/ha)	Quantity N from residues (kg N/ha)	Quantity N from atmospheric deposition & irrigation water (kg N/ha)	Total N inputs (kg N/ha)	Total N20 emissions (kg CO2eq/ha)
		Maize grains		0.214366	0.0145	6.79014	0.0165	7.72671	N20 default emission factor	6.79014				0	0	0	0	N20 default PEM	0.214366
		On-farm energy use and energy use for production of fertilizer and pesticides
		Output type	Type of input and energy use	Default global average production emissions per output from on-farm energy use and production of inputs (kg CO2eq/kg of crop or animal product)	Site-specific calculations								Energy use PEM chosen (select default or site-specific) (kg CO2eq/kg output)
					Emission factors (emissions per hectare)		Selection of emission factors to be used in the further analysis.		Quantity of energy use and fertilizer and pesticide inputs used per hectare and year
					Default emission factors of inputs and energy use (t CO2eq/kg of input or for tractor fuel and on-farm energy (GJ)	Site-specific emission factors of inputs and energy use (t CO2eq/kg of input)	Choice of emission factors (drop-down menus)	Chosen emission factors (t CO2eq/kg of input)	Site-specific quantity per ha (kg product/ha/year)	Total emissions per ha (kg C02eq/ha)	Output yield (tons crop output/ha)	Total emissions per output (kg CO2eq/ kg output)
		Maize grains	Nitrogen production & transportation	0.107296	3.628		Energy use default emission factor	3.628		0	0	0	Energy use default PEM	0.247435
			Phosphate production & transportation	0.00739278	1.238		Energy use default emission factor	1.238		0		0
			Pesticides production & transportation	0.0344681	28		Energy use default emission factor	28		0		0
			Potassium production & transportation	0.00356756	0.818		Energy use default emission factor	0.818		0		0
			Diesel	0.0947107	94.1176		Energy use default emission factor	94.1176		0		0
			Gasoline		86.9565		Energy use default emission factor	86.9565		0		0
			Electricity		172.222		Energy use default emission factor	172.222		0		0
			Total	0.247435					Total	0	Total	0
		Rice methane
				Global average methane emissions per kg crop (kg CO2eq/ kg of rice output)	Rice methane site-specific PEM													Rice methane PEM chosen (kg CO2eq/kg)
					Rice methane emission factor						Quantity of output				Rice methane site-specific PEM (kg CO2eq/kg)
					Rice methane default emission factor (kg CO2eq/ha)		Rice methane site-specific emission factor (use IPCC Tier 2) (kg CO2eq/ha)		Select rice methane emission factor to use	Chosen rice methane emission factor (kg CO2eq/ha)	Default global average rice yield (t fresh matter/ha)	Site-specific rice yield (t fresh matter/ha)	Rice yield chosen (t fresh matter/ha)
		Rice grains (rough)		1.77644	10200				Rice methane default emission factor	10200	5.79937		Rice yield default	5.79937	1.75881			Rice methane site-specific PEM	0
		Crop 1 PEM Total (kg CO2e/kg crop 1 output)	0.461801
#REF!		Crop product 2		Maize grains
		N20 from fertilization
		Output type		N20 default global average PEM per output (CO2eq/kg)	N20 Site-specific PEM per output (CO2eq/kg)													N20 PEM chosen (select default or site-specific) (kg CO2eq/kg)
					N20 Emission factor						Quantity of N inputs					Yield (t crop output/ha/yr)	N20 Site-specific PEM (kg CO2eq/ kg)
					N20 Default emission factor		N20 Site-specific emission factor		N20 emission factor chosen
					Emissions as % of fertilization input (N20-N/N)	CO2eq/N inputs (kg CO2eq/kg N inputs)	Emissions as % of fertilization input (N20-N/N)	In CO2eq/N inputs (kg CO2eq/kg N inputs)			Quantity N fertilizer per hectare (kg N/ha)	Quantity N from residues (kg N/ha)	Quantity N from atmospheric deposition & irrigation water (kg N/ha)	Total N inputs (kg N/ha)	Total N20 emissions (kg CO2eq/ha)
		Maize grains		0.214366	0.0145	6.79014	1.65	772.671	N20 default emission factor	6.79014				0	0	0	0	N20 default PEM	0.214366
		On-farm energy use and energy use for production of fertilizer and pesticides
		Output type	Type of input and energy use	Default global average production emissions per output from on-farm energy use and production of inputs (kg CO2eq/kg of crop or animal product)	Site-specific calculations								Energy use PEM chosen (select default or site-specific) (kg CO2eq/kg output)
					Emission factors (emissions per hectare)		Selection of emission factors to be used in the further analysis.		Quantity of energy use and fertilizer and pesticide inputs used per hectare and year
					Default emission factors of inputs and energy use (t CO2eq per kg of input or for tractor fuel and on farm energy use per GJ)	Site-specific emission factors of inputs and energy use (t CO2eq/kg of input)	Choice of emission factors (drop-down menus)	Chosen emission factors (t CO2eq/kg of input)	Site-specific quantity per ha (kg product/ha/year)	Total emissions per ha (kg C02eq/ha)	Yield (tons crop output/ha)	Total emissions per output (kg CO2eq/ kg output)
		Maize grains	Nitrogen production & transportation	0.107296	3.628		Energy use default emission factor	3.628		0	0	0	Energy use default PEM	0.247435
			Phosphate production & transportation	0.00739278	1.238		Energy use default emission factor	1.238		0		0
			Pesticides production & transportation	0.0344681	28		Energy use default emission factor	28		0		0
			Potassium production & transportation	0.00356756	0.818		Energy use default emission factor	0.818		0		0
			Diesel	0.0947107	94.1176		Energy use default emission factor	94.1176		0		0
			Gasoline		86.9565		Energy use default emission factor	86.9565		0		0
			Electricity		172.222		Energy use default emission factor	172.222		0		0
			Total	0.247435					Total	0	Total	0
		Rice methane
				Global average methane emissions per kg crop (kg CO2eq/ kg of rice output)	Rice methane site-specific PEM													Rice methane PEM chosen (kg CO2eq/kg)
					Rice methane emission factor						Quantity of output				Rice methane site-specific PEM (kg CO2eq/kg)
					Rice methane default emission factor (kg CO2eq/ha)		Rice methane site-specific emission factor (use IPCC Tier 2) (kg CO2eq/ha)		Select rice methane emission factor to use	Chosen rice methane emission factor (kg CO2eq/ha)	Default global average rice yield (t fresh matter/ha)	Site-specific rice yield (t fresh matter/ha)	Rice yield chosen (t fresh matter/ha)
		Rice grains (rough)		1.77644	10200				Rice methane default emission factor	10200	5.79937		Rice yield default	5.79937	1.75881			Rice methane default PEM	0
		Crop PEM Total (kgs CO2e/kg crop 2 output)	0.461801
		Crop product 3		Maize grains
		N20 from fertilization
		Output type		N20 default global average PEM per output (CO2eq/kg)	N20 Site-specific PEM per output (CO2eq/kg)													N20 PEM chosen (select default or site-specific) (kg CO2eq/kg)
					N20 Emission factor						Quantity of N inputs					Yield (t crop output/ha/yr)	N20 Site-specific PEM (kg CO2eq/ kg)
					N20 Default emission factor		N20 Site-specific emission factor		N20 emission factor chosen
					Emissions as % of fertilization input (N20-N/N)	CO2eq/N inputs (kg CO2eq/kg N inputs)	Emissions as % of fertilization input (N20-N/N)	In CO2eq/N inputs (kg CO2eq/kg N inputs)			Quantity N fertilizer per hectare (kg N/ha)	Quantity N from residues (kg N/ha)	Quantity N from atmospheric deposition & irrigation water (kg N/ha)	Total N inputs (kg N/ha)	Total N20 emissions (kg CO2eq/ha)
		Maize grains		0.214366	0.0145	6.79014	1.65	772.671	N20 default emission factor	6.79014				0	0	0	0	N20 default PEM	0.214366
		On-farm energy use and energy use for production of fertilizer and pesticides
		Output type	Type of input and energy use	Default global average production emissions per output from on-farm energy use and production of inputs (kg CO2eq/kg of crop or animal product)	Site-specific calculations								Energy use PEM chosen (select default or site-specific) (kg CO2eq/kg output)
					Emission factors (emissions per hectare)		Selection of emission factors to be used in the further analysis.		Quantity of energy use and fertilizer and pesticide inputs used per hectare and year
					Default emission factors of inputs and energy use (t CO2eq/kg of input)	Site-specific emission factors of inputs and energy use (t CO2eq/kg of input)	Choice of emission factors (drop-down menus)	Chosen emission factors (t CO2eq/kg of input)	Site-specific quantity per ha (kg product/ha/year)	Total emissions per ha (kg C02eq/ha)	Yield (t crop output/ha)	Total emissions per output (kg CO2eq/ kg output)
		Maize grains	Nitrogen production & transportation	0.107296	3.628		Energy use default emission factor	3.628		0	0	0	Energy use default PEM	0.247435
			Phosphate production & transportation	0.00739278	1.238		Energy use default emission factor	1.238		0		0
			Pesticides production & transportation	0.0344681	28		Energy use default emission factor	28		0		0
			Potassium production & transportation	0.00356756	0.818		Energy use default emission factor	0.818		0		0
			Diesel	0.0947107	94.1176		Energy use default emission factor	94.1176		0		0
			Gasoline		86.9565		Energy use default emission factor	86.9565		0		0
			Electricity		172.222		Energy use default emission factor	172.222		0		0
			Total	0.247435					Total	0	Total	0
		Rice methane
				Global average methane emissions per kg crop (kg CO2eq/ kg of rice output)	Rice methane site-specific PEM													Rice methane PEM chosen (kg CO2eq/kg)
					Rice methane emission factor						Quantity of output				Rice methane site-specific PEM (kg CO2eq/kg)
					Rice methane default emission factor (kg CO2eq/ha)		Rice methane site-specific emission factor (use IPCC Tier 2) (kg CO2eq/ha)		Select rice methane emission factor to use	Chosen rice methane emission factor (kg CO2eq/ha)	Default global average rice yield (t fresh matter/ha)	Site-specific rice yield (t fresh matter/ha)	Rice yield chosen (t fresh matter/ha)
		Rice grains (rough)		1.77644	10200				Rice methane default emission factor	10200	5.79937		Rice yield default	5.79937	1.75881			Rice methane default PEM	0
		Crop PEM Total (kgs CO2e/kg crop 3 output)	0.461801
		Energy Use Converter (common energy uses to gigajoules)
			Quanity	GJ/unit	Total
		Diesel LHV (liter)		0.034	0
		Gasoline LHV (liter)		0.032	0
		Electricity (kwh)		0.0036	0
		Total			0

## Sheet: 3.2 Site PEMs Crops New LU
		Site-Specific Production Emissions (PEM) Calculator for Crop Products Under Existing Use & Management
		Crop product 1		Maize grains
		N20 from fertilization
		Output type		N20 default global average PEM per output (CO2eq/kg)	N20 Site-specific PEM per output (CO2eq/kg)													N20 PEM chosen (select default or site-specific) (kg CO2eq/kg)
					N20 Emission factor						Quantity of N inputs					Yield (t crop output/ha/yr)	N20 Site-specific PEM (kg CO2eq/ kg)
					N20 Default emission factor		N20 Site-specific emission factor		N20 emission factor chosen
					Emissions as % of fertilization input (N20-N/N)	CO2eq/N inputs (kg CO2eq/kg N inputs)	Emissions as % of fertilization input (N20-N/N)	In CO2eq/N inputs (kg CO2eq/kg N inputs)			Quantity N fertilizer per hectare (kg N/ha)	Quantity N from residues (kg N/ha)	Quantity N from atmospheric deposition & irrigation water (kg N/ha)	Total N inputs (kg N/ha)	Total N20 emissions (kg CO2eq/ha)
		Maize grains		0.214366	0.0145	6.79014	0.0165	7.72671	N20 default emission factor	6.79014				0	0	0	0	N20 default PEM	0.214366
		On-farm energy use and energy use for production of fertilizer and pesticides
		Output type	Type of input and energy use	Default global average production emissions per output from on-farm energy use and production of inputs (kg CO2eq/kg of crop or animal product)	Site-specific calculations								Energy use PEM chosen (select default or site-specific) (kg CO2eq/kg output)
					Emission factors (emissions per hectare)		Selection of emission factors to be used in the further analysis.		Quantity of energy use and fertilizer and pesticide inputs used per hectare and year
					Default emission factors of inputs and energy use (t CO2eq/kg of input or for tractor fuel and on-farm energy (GJ)	Site-specific emission factors of inputs and energy use (t CO2eq/kg of input)	Choice of emission factors (drop-down menus)	Chosen emission factors (t CO2eq/kg of input)	Site-specific quantity per ha (kg product/ha/year)	Total emissions per ha (kg C02eq/ha)	Output yield (tons crop output/ha)	Total emissions per output (kg CO2eq/ kg output)
		Maize grains	Nitrogen production & transportation	0.107296	3.628		Energy use default emission factor	3.628		0	0	0	Energy use default PEM	0.247435
			Phosphate production & transportation	0.00739278	1.238		Energy use default emission factor	1.238		0		0
			Pesticides production & transportation	0.0344681	28		Energy use default emission factor	28		0		0
			Potassium production & transportation	0.00356756	0.818		Energy use default emission factor	0.818		0		0
			Diesel	0.0947107	94.1176		Energy use default emission factor	94.1176		0		0
			Gasoline		86.9565		Energy use default emission factor	86.9565		0		0
			Electricity		172.222		Energy use default emission factor	172.222		0		0
			Total	0.247435					Total	0	Total	0
		Rice methane
				Global average methane emissions per kg crop (kg CO2eq/ kg of rice output)	Rice methane site-specific PEM													Rice methane PEM chosen (kg CO2eq/kg)
					Rice methane emission factor						Quantity of output				Rice methane site-specific PEM (kg CO2eq/kg)
					Rice methane default emission factor (kg CO2eq/ha)		Rice methane site-specific emission factor (use IPCC Tier 2) (kg CO2eq/ha)		Select rice methane emission factor to use	Chosen rice methane emission factor (kg CO2eq/ha)	Default global average rice yield (t fresh matter/ha)	Site-specific rice yield (t fresh matter/ha)	Rice yield chosen (t fresh matter/ha)
		Rice grains (rough)		1.77644	10200				Rice methane default emission factor	10200	5.79937		Rice yield default	5.79937	1.75881			Rice methane default PEM	0
		Crop 1 PEM Total (kg CO2eq/kg output)	0.461801
#REF!		Crop product 2		Maize grains
		N20 from fertilization
		Output type		N20 default global average PEM per output (CO2eq/kg)	N20 Site-specific PEM per output (CO2eq/kg)													N20 PEM chosen (select default or site-specific) (kg CO2eq/kg)
					N20 Emission factor						Quantity of N inputs					Yield (t crop output/ha/yr)	N20 Site-specific PEM (kg CO2eq/ kg)
					N20 Default emission factor		N20 Site-specific emission factor		N20 emission factor chosen
					Emissions as % of fertilization input (N20-N/N)	CO2eq/N inputs (kg CO2eq/kg N inputs)	Emissions as % of fertilization input (N20-N/N)	In CO2eq/N inputs (kg CO2eq/kg N inputs)			Quantity N fertilizer per hectare (kg N/ha)	Quantity N from residues (kg N/ha)	Quantity N from atmospheric deposition & irrigation water (kg N/ha)	Total N inputs (kg N/ha)	Total N20 emissions (kg CO2eq/ha)
		Maize grains		0.214366	0.0145	6.79014	1.65	772.671	N20 default emission factor	6.79014				0	0	0	0	N20 default PEM	0.214366
		On-farm energy use and energy use for production of fertilizer and pesticides
		Output type	Type of input and energy use	Default global average production emissions per output from on-farm energy use and production of inputs (kg CO2eq/kg of crop or animal product)	Site-specific calculations								Energy use PEM chosen (select default or site-specific) (kg CO2eq/kg output)
					Emission factors (emissions per hectare)		Selection of emission factors to be used in the further analysis.		Quantity of energy use and fertilizer and pesticide inputs used per hectare and year
					Default emission factors of inputs and energy use (t CO2eq/kg of input or for tractor fuel and on-farm energy (GJ)	Site-specific emission factors of inputs and energy use (t CO2eq/kg of input)	Choice of emission factors (drop-down menus)	Chosen emission factors (t CO2eq/kg of input)	Site-specific quantity per ha (kg product/ha/year)	Total emissions per ha (kg C02eq/ha)	Output yield (tons crop output/ha)	Total emissions per output (kg CO2eq/ kg output)
		Maize grains	Nitrogen production & transportation	0.107296	3.628		Energy use default emission factor	3.628		0	0	0	Energy use default PEM	0.247435
			Phosphate production & transportation	0.00739278	1.238		Energy use default emission factor	1.238		0		0
			Pesticides production & transportation	0.0344681	28		Energy use default emission factor	28		0		0
			Potassium production & transportation	0.00356756	0.818		Energy use default emission factor	0.818		0		0
			Diesel	0.0947107	94.1176		Energy use default emission factor	94.1176		0		0
			Gasoline		86.9565		Energy use default emission factor	86.9565		0		0
			Electricity		172.222		Energy use default emission factor	172.222		0		0
			Total	0.247435					Total	0	Total	0
		Rice methane
				Global average methane emissions per kg crop (kg CO2eq/ kg of rice output)	Rice methane site-specific PEM													Rice methane PEM chosen (kg CO2eq/kg)
					Rice methane emission factor						Quantity of output				Rice methane site-specific PEM (kg CO2eq/kg)
					Rice methane default emission factor (kg CO2eq/ha)		Rice methane site-specific emission factor (use IPCC Tier 2) (kg CO2eq/ha)		Select rice methane emission factor to use	Chosen rice methane emission factor (kg CO2eq/ha)	Default global average rice yield (t fresh matter/ha)	Site-specific rice yield (t fresh matter/ha)	Rice yield chosen (t fresh matter/ha)
		Rice grains (rough)		1.77644	10200				Rice methane default emission factor	10200	5.79937		Rice yield default	5.79937	1.75881			Rice methane default PEM	0
		Crop PEM Total (kgs CO2e/kg crop 2 output)	0.461801
		Crop product 3		Maize grains
		N20 from fertilization
		Output type		N20 default global average PEM per output (CO2eq/kg)	N20 Site-specific PEM per output (CO2eq/kg)													N20 PEM chosen (select default or site-specific) (kg CO2eq/kg)
					N20 Emission factor						Quantity of N inputs					Yield (t crop output/ha/yr)	N20 Site-specific PEM (kg CO2eq/ kg)
					N20 Default emission factor		N20 Site-specific emission factor		N20 emission factor chosen
					Emissions as % of fertilization input (N20-N/N)	CO2eq/N inputs (kg CO2eq/kg N inputs)	Emissions as % of fertilization input (N20-N/N)	In CO2eq/N inputs (kg CO2eq/kg N inputs)			Quantity N fertilizer per hectare (kg N/ha)	Quantity N from residues (kg N/ha)	Quantity N from atmospheric deposition & irrigation water (kg N/ha)	Total N inputs (kg N/ha)	Total N20 emissions (kg CO2eq/ha)
		Maize grains		0.214366	0.0145	6.79014	1.65	772.671	N20 default emission factor	6.79014				0	0	0	0	N20 default PEM	0.214366
		On-farm energy use and energy use for production of fertilizer and pesticides
		Output type	Type of input and energy use	Default global average production emissions per output from on-farm energy use and production of inputs (kg CO2eq/kg of crop or animal product)	Site-specific calculations								Energy use PEM chosen (select default or site-specific) (kg CO2eq/kg output)
					Emission factors (emissions per hectare)		Selection of emission factors to be used in the further analysis.		Quantity of energy use and fertilizer and pesticide inputs used per hectare and year
					Default emission factors of inputs and energy use (t CO2eq/kg of input or for tractor fuel and on-farm energy (GJ)	Site-specific emission factors of inputs and energy use (t CO2eq/kg of input)	Choice of emission factors (drop-down menus)	Chosen emission factors (t CO2eq/kg of input)	Site-specific quantity per ha (kg product/ha/year)	Total emissions per ha (kg C02eq/ha)	Output yield (tons crop output/ha)	Total emissions per output (kg CO2eq/ kg output)
		Maize grains	Nitrogen production & transportation	0.107296	3.628		Energy use default emission factor	3.628		0	0	0	Energy use default PEM	0.247435
			Phosphate production & transportation	0.00739278	1.238		Energy use default emission factor	1.238		0		0
			Pesticides production & transportation	0.0344681	28		Energy use default emission factor	28		0		0
			Potassium production & transportation	0.00356756	0.818		Energy use default emission factor	0.818		0		0
			Diesel	0.0947107	94.1176		Energy use default emission factor	94.1176		0		0
			Gasoline		86.9565		Energy use default emission factor	86.9565		0		0
			Electricity		172.222		Energy use default emission factor	172.222		0		0
			Total	0.247435					Total	0	Total	0
		Rice methane
				Global average methane emissions per kg crop (kg CO2eq/ kg of rice output)	Rice methane site-specific PEM													Rice methane PEM chosen (kg CO2eq/kg)
					Rice methane emission factor						Quantity of output				Rice methane site-specific PEM (kg CO2eq/kg)
					Rice methane default emission factor (kg CO2eq/ha)		Rice methane site-specific emission factor (use IPCC Tier 2) (kg CO2eq/ha)		Select rice methane emission factor to use	Chosen rice methane emission factor (kg CO2eq/ha)	Default global average rice yield (t fresh matter/ha)	Site-specific rice yield (t fresh matter/ha)	Rice yield chosen (t fresh matter/ha)
		Rice grains (rough)		1.77644	10200				Rice methane default emission factor	10200	5.79937		Rice yield default	5.79937	1.75881			Rice methane default PEM	0
		Crop PEM Total (kgs CO2e/kg crop 3 output)	0.461801
		Energy Use Converter (common energy uses to gigajoules)
			Quanity	GJ/unit	Total
		Diesel (liter)		0.039	0
		Gasoline (liter)		0.034	0
		Electricity (kwh)		0.0036	0
		Total			0

## Sheet: 3.3 Site PEMs LS Existing LU
		Site-Specific Production Emissions (PEM) Calculator for Livestock Products Under Existing Use & Management
		Livestock product 1
		Enteric Emissions (CH4)
		Animal category	Global average emissions (CO2eq/kg product)	Site-specific emissions in CO2eq/kg product
				kg product/animal/year	Emissions per animal	Site-specific emissions per kg product	Default or site-specific emissions (drop down menu)	Emissions per unit product (kg CO2eq/kg product)
		Beef	26.7238			0	Livestock product default	26.7238
		Manure Management Emissions (CH4 and N2O)
		Animal category	Global average emissions (CO2eq/kg product)	Site-specific emissions in CO2eq/kg product
				kg product/animal/year	Emissions per animal	Site-specific emissions per kg product	Default or site-specific emissions (drop down menu)	Emissions per unit product (kg CO2eq/kg product)
		Beef	3.50999			0	Livestock product default	3.50999
		Pasture, Range and Paddock Emissions (PRP) (N2O)
		Animal category	Global average emissions (CO2eq/kg product)	Site-specific emissions in CO2eq/kg product
				kg DM/animal/year	Emissions per kg feed	Site-specific emissions per kg product	Default or site-specific emissions (drop down menu)	Emissions per unit product (kg CO2eq/kg product)
		Beef	7.98507			0	Livestock product default	7.98507
		Production emissions from feed production and energy use on-farm (including all feeds and pastures)
		Animal category	Global average emissions (CO2eq/kg product)	Site-specific estimates from sheet 3.3a (CO2eq/ kg of livestock product)	Choose production emissions to use	Production emissions used (CO2eq/kg product)
		Beef	5.6	0	Global average emissions	5.6
		Site-specific production emissions by animal category (kg CO2eq/kg output)
		Beef	43.8188
		Livestock product 2
		Enteric Emissions (CH4)
		Animal category	Global average emissions (CO2eq/kg product)	Site-specific emissions in CO2eq/kg product
				kg product/animal/year	Emissions per animal	Site-specific emissions per kg product	Default or site-specific emissions (drop down menu)	Emissions per unit product (kg CO2eq/kg product)
		Beef	26.7238			0	Livestock product default	26.7238
		Manure Management Emissions (CH4 and N2O)
		Animal category	Global average emissions (CO2eq/kg product)	Site-specific emissions in CO2eq/kg product
				kg product/animal/year	Emissions per animal	Site-specific emissions per kg product	Default or site-specific emissions (drop down menu)	Emissions per unit product (kg CO2eq/kg product)
		Beef	3.50999			0	Livestock product default	3.50999
		Pasture, Range and Paddock Emissions (PRP) (N2O)
		Animal category	Global average emissions (CO2eq/kg product)	Site-specific emissions in CO2eq/kg product
				kg DM/animal/year	Emissions per kg feed	Site-specific emissions per kg product	Default or site-specific emissions (drop down menu)	Emissions per unit product (kg CO2eq/kg product)
		Beef	7.98507			0	Livestock product default	7.98507
		Production emissions from feed production and energy use on-farm (including all feeds and pastures)
		Animal category	Global average emissions (CO2eq/kg product)	Site-specific estimates from sheet 3.3a (CO2eq/ kg livestock product)	Choose production emissions to use	Production emissions used (CO2eq/kg product)
		Beef	5.6	0	Global average emissions	5.6
		Site-specific production emissions by animal category (kg CO2eq/kg output)
		Beef	43.8188
		Livestock product 3
		Enteric Emissions (CH4)
		Animal category	Global average emissions (CO2eq/kg product)	Site-specific emissions in CO2eq/kg product
				kg product/animal/year	Emissions per animal	Site-specific emissions per kg product	Default or site-specific emissions (drop down menu)	Emissions per unit product (kg CO2eq/kg product)
		Beef	26.7238			0	Livestock product default	26.7238
		Manure Management Emissions (CH4 and N2O)
		Animal category	Global average emissions (CO2eq/kg product)	Site-specific emissions in CO2eq/kg product
				kg product/animal/year	Emissions per animal	Site-specific emissions per kg product	Default or site-specific emissions (drop down menu)	Emissions per unit product (kg CO2eq/kg product)
		Beef	3.50999			0	Livestock product default	3.50999
		Pasture, Range and Paddock Emissions (PRP) (N2O)
		Animal category	Global average emissions (CO2eq/kg product)	Site-specific emissions in CO2eq/kg product
				kg DM/animal/year	Emissions per kg feed	Site-specific emissions per kg product	Default or site-specific emissions (drop down menu)	Emissions per unit product (kg CO2eq/kg product)
		Beef	7.98507			0	Livestock product default	7.98507
		Production emissions from feed production and energy use on-farm (including all feeds and pastures)
		Animal category	Global average emissions (CO2eq/kg product)	Site-specific estimates from sheet 3.3a (CO2eq/ kg livestock product)	Choose production emissions to use	Production emissions used (CO2eq/kg product)
		Beef	5.6	0	Global average emissions	5.6
		Site-specific production emissions by animal category (kg CO2eq/kg output)
		Beef	43.8188

## Sheet: 3.3a Site Feed PEMs Existing LU
		Site-Specific Production Emissions for Livestock Feeds and Energy Use on Farm
		Livestock Product 1		Beef
		Production emissions of non-pasture feeds
		Production emissions of all feeds (non-pasture)
		Feed Type	Default PEMs for feed (kg CO2eq/kg of feed)	Site-specific PEMs for feed (kg CO2eq/kg of feed)	Select to use default or site-specific PEMs in calculation.	Quantity of all feeds (on-farm or purchased) (kg/ha/y)	Livestock output yield (kg product/ha/yr)	PEMs for specific feed (CO2eq/kg animal product)
		Maize grains	0.461801		Default PEM		0	0
		Maize grains	0.461801		Default PEM		0	0
		Maize grains	0.461801		Default PEM		0	0
		Maize grains	0.461801		Default PEM		0	0
		Maize grains	0.461801		Default PEM		0	0
		Maize grains	0.461801		Default PEM		0	0
							Total	0
		Production emissions on pastures
		Nitrous Oxide for Nitrogen Applied to Pasture Other than Nitrogen Deposited by Grazing Animals
			Global average default factors
		Animal category for pasture or forage crop	Emissions % of input (N20-N/N fertilizer use)		Emissions CO2eq/N inputs (kg CO2eq/kg N inputs) Chose using default or user-defined value in dropdown menu below.	Quantity N fertilizer per hectare (kg/ha)	Quantity N from residues (kg/ha)	Quantity N from atmospheric deposition (kg/ha)	Total N inputs (kg/ha)	Total N20 emissions (kg CO2eq/ha)	Livestock output (kg product/ha/y)	Emissions per kg of output (kgCO2eq/ kg of output)
			Default value	User-defined value	Default value
		Beef	0.0145		6.79014				0	0	0	0
		Emissions from energy use for inputs used on pasture or in livestock management on farm
		Category of Energy Emissions			Default emissions factors (kg CO2eq/per kg of input)	Site-specific emission factors (kg CO2eq/per kg of input)	Chosen emission factors	Emission factors used in calculations (kg CO2eq/per kg of input)	Quantity of input per hectare (kg/ha)	Emissions per hectare (kg CO2eq/ha)	Livestock output (kg product/ha/y)	Emissions per kg of animal product output (kg CO2eq/ kg output)
		Nitrogen production & transportation			3.628		Energy use default emission factor	3.628		0	0	0
		Phosphorus production & transportation			1.238		Energy use default emission factor	1.238		0	0	0
		Potash production & transportation			0.818		Energy use default emission factor	0.818		0	0	0
		Pesticides (activie ingredient) production & transportation			28		Energy use default emission factor	28		0	0	0
		Energy use for tractors on pasture & other non-feed on-farm uses
		Energy type	Unit	Global average emission factor	Site-specific emission factor	Choose emission factor to be used	Quantity of energy type used (liters of fuel or kWh of electricity)	Emissions from fuel and energy use (kg CO2eq)	Livestock output (kg product/ha/y)	Total emissions per kg animal product output (kg CO2eq/kg product)
		Diesel	kgCO2eq/l	3.2		Use default values		0	0	0
		Gasoline	kgCO2eq/l	2.8		Use default values		0	0
		Electricity	kgCO2eq/kWh	0.62		Use default values		0	0
		Site-specific production emissions by animal category (kg CO2eq/kg output)
		Beef	0
		Livestock Product 2		Beef
		Production emissions of non-pasture feeds
		Production emissions of all feeds (non-pasture)
		Feed Type	Default PEMs for feed (kg CO2eq/kg of feed)	Site-specific PEMs for feed (kg CO2eq/kg of feed)	Select to use default or site-specific PEMs in calculation.	Quantity of all feeds (on-farm or purchased) (kg/ha/y)	Livestock output yield (kg product/ha/yr)	PEMs for specific feed (CO2eq/kg animal product)
		Maize grains	0.461801		Default PEM		0	0
		Maize grains	0.461801		Default PEM		0	0
		Maize grains	0.461801		Default PEM		0	0
		Maize grains	0.461801		Default PEM		0	0
		Maize grains	0.461801		Default PEM		0	0
		Maize grains	0.461801		Default PEM		0	0
							Total	0
		Production emissions on pastures
		Nitrous Oxide for Nitrogen Applied to Pasture Other than Nitrogen Deposited by Grazing Animals
			Global average default factors
		Animal category for pasture or forage crop	Emissions % of input (N20-N/N fertilizer use)		Emissions CO2eq/N inputs (kg CO2eq/kg N inputs) Chose using default or user-defined value in dropdown menu below.	Quantity N fertilizer per hectare (kg/ha)	Quantity N from residues (kg/ha)	Quantity N from atmospheric deposition (kg/ha)	Total N inputs (kg/ha)	Total N20 emissions (kg CO2eq/ha)	Livestock output (kg product/ha/y)	Emissions per kg of output (kgCO2eq/ kg of output)
			Default value	User-defined value	Default value
		Beef	0.0145		6.79014				0	0	0	0
		Emissions from energy use for inputs used on pasture or in livestock management on farm
		Category of Energy Emissions			Default emissions factors (kg CO2eq/per kg of input)	Site-specific emission factors (kg CO2eq/per kg of input)	Chosen emission factors	Emission factors used in calculations (kg CO2eq/per kg of input)	Quantity of input per hectare (kg/ha)	Emissions per hectare (kg CO2eq/ha)	Livestock output (kg product/ha/y)	Emissions per kg of animal product output (kg CO2eq/ kg output)
		Nitrogen production & transportation			3.628		Energy use default emission factor	3.628		0	0	0
		Phosphorus production & transportation			1.238		Energy use default emission factor	1.238		0	0	0
		Potash production & transportation			0.818		Energy use default emission factor	0.818		0	0	0
		Pesticides (activie ingredient) production & transportation			28		Energy use default emission factor	28		0	0	0
		Energy use for tractors & other on-farm uses
		Energy type	Unit	Global average emission factor	Site-specific emission factor	Choose emission factor to be used	Quantity of energy type used (liters of fuel or kWh of electricity)	Emissions from fuel and energy use (kg CO2eq)	Livestock output (kg product/ha/y)	Total emissions per kg animal product output (kg CO2eq/kg product)
		Diesel	kgCO2eq/l	3.2		Use default values		0	0	0
		Gasoline	kgCO2eq/l	2.8		Use default values		0	0
		Electricity	kgCO2eq/kWh	0.62		Use default values		0	0
		Site-specific production emissions by animal category (kg CO2eq/kg output)
		Beef	0
		Livestock Product 3		Beef
		Production emissions of non-pasture feeds
		Production emissions of all feeds (non-pasture)
		Feed Type	Default PEMs for feed (kg CO2eq/kg of feed)	Site-specific PEMs for feed (kg CO2eq/kg of feed)	Select to use default or site-specific PEMs in calculation.	Quantity of all feeds (on-farm or purchased) (kg/ha/y)	Livestock output yield (kg product/ha/yr)	PEMs for specific feed (CO2eq/kg animal product)
		Maize grains	0.461801		Default PEM		0	0
		Maize grains	0.461801		Default PEM		0	0
		Maize grains	0.461801		Default PEM		0	0
		Maize grains	0.461801		Default PEM		0	0
		Maize grains	0.461801		Default PEM		0	0
		Maize grains	0.461801		Default PEM		0	0
							Total	0
		Production emissions on pastures
		Nitrous Oxide for Nitrogen Applied to Pasture Other than Nitrogen Deposited by Grazing Animals
			Global average default factors
		Animal category for pasture or forage crop	Emissions % of input (N20-N/N fertilizer use)		Emissions CO2eq/N inputs (kg CO2eq/kg N inputs) Chose using default or user-defined value in dropdown menu below.	Quantity N fertilizer per hectare (kg/ha)	Quantity N from residues (kg/ha)	Quantity N from atmospheric deposition (kg/ha)	Total N inputs (kg/ha)	Total N20 emissions (kg CO2eq/ha)	Livestock output (kg product/ha/y)	Emissions per kg of output (kgCO2eq/ kg of output)
			Default value	User-defined value	Default value
		Beef	0.0145		6.79014				0	0	0	0
		Emissions from energy use for inputs used on pasture or in livestock management on farm
		Category of Energy Emissions			Default emissions factors (kg CO2eq/per kg of input)	Site-specific emission factors (kg CO2eq/per kg of input)	Chosen emission factors	Emission factors used in calculations (kg CO2eq/per kg of input)	Quantity of input per hectare (kg/ha)	Emissions per hectare (kg CO2eq/ha)	Livestock output (kg product/ha/y)	Emissions per kg of animal product output (kg CO2eq/ kg output)
		Nitrogen production & transportation			3.628		Energy use default emission factor	3.628		0	0	0
		Phosphorus production & transportation			1.238		Energy use default emission factor	1.238		0	0	0
		Potash production & transportation			0.818		Energy use default emission factor	0.818		0	0	0
		Pesticides (activie ingredient) production & transportation			28		Energy use default emission factor	28		0	0	0
		Energy use for tractors & other on-farm uses
		Energy type	Unit	Global average emission factor	Site-specific emission factor	Choose emission factor to be used	Quantity of energy type used (liters of fuel or kWh of electricity)	Emissions from fuel and energy use (kg CO2eq)	Livestock output (kg product/ha/y)	Total emissions per kg animal product output (kg CO2eq/kg product)
		Diesel	kgCO2eq/l	3.2		Use default values		0	0	0
		Gasoline	kgCO2eq/l	2.8		Use default values		0	0
		Electricity	kgCO2eq/kWh	0.62		Use default values		0	0
		Site-specific production emissions by animal category (kg CO2eq/kg output)
		Beef	0

## Sheet: 3.4 Site PEMs LS New LU
		Site-Specific Production Emissions (PEM) Calculator for Livestock Products Under Existing Use & Management
		Livestock product 1
		Enteric Emissions (CH4)
		Animal category	Global average emissions (CO2eq/kg product)	Site-specific emissions in CO2eq/kg product
				kg product/animal/year	Emissions per animal	Site-specific emissions per kg product	Default or site-specific emissions (drop down menu)	Emissions per unit product (kg CO2eq/kg product)
		Beef	26.7238			0	Livestock product default	26.7238
		Manure Management Emissions (CH4 and N2O)
		Animal category	Global average emissions (CO2eq/kg product)	Site-specific emissions in CO2eq/kg product
				kg product/animal/year	Emissions per animal	Site-specific emissions per kg product	Default or site-specific emissions (drop down menu)	Emissions per unit product (kg CO2eq/kg product)
		Beef	3.50999			0	Livestock product default	3.50999
		Pasture, Range and Paddock Emissions (PRP) (N2O)
		Animal category	Global average emissions (CO2eq/kg product)	Site-specific emissions in CO2eq/kg product
				kg DM/animal/year	Emissions per kg feed	Site-specific emissions per kg product	Default or site-specific emissions (drop down menu)	Emissions per unit product (kg CO2eq/kg product)
		Beef	7.98507			0	Livestock product default	7.98507
		Production emissions from feed production and energy use on-farm (including all feeds and pastures)
		Animal category	Global average emissions (CO2eq/kg product)	Site-specific estimates from sheet 3.4a (CO2eq/ kg of livestock product)	Choose production emissions to use	Production emissions used (CO2eq/kg product)
		Beef	5.6	0	Global average emissions	5.6
		Site-specific production emissions by animal category (kg CO2eq/kg output)
		Beef	43.8188
		Livestock product 2
		Enteric Emissions (CH4)
		Animal category	Global average emissions (CO2eq/kg product)	Site-specific emissions in CO2eq/kg product
				kg product/animal/year	Emissions per animal	Site-specific emissions per kg product	Default or site-specific emissions (drop down menu)	Emissions per unit product (kg CO2eq/kg product)
		Beef	26.7238			0	Livestock product default	26.7238
		Manure Management Emissions (CH4 and N2O)
		Animal category	Global average emissions (CO2eq/kg product)	Site-specific emissions in CO2eq/kg product
				kg product/animal/year	Emissions per animal	Site-specific emissions per kg product	Default or site-specific emissions (drop down menu)	Emissions per unit product (kg CO2eq/kg product)
		Beef	3.50999			0	Livestock product default	3.50999
		Pasture, Range and Paddock Emissions (PRP) (N2O)
		Animal category	Global average emissions (CO2eq/kg product)	Site-specific emissions in CO2eq/kg product
				kg DM/animal/year	Emissions per kg feed	Site-specific emissions per kg product	Default or site-specific emissions (drop down menu)	Emissions per unit product (kg CO2eq/kg product)
		Beef	7.98507			0	Livestock product default	7.98507
		Production emissions from feed production and energy use on-farm (including all feeds and pastures)
		Animal category	Global average emissions (CO2eq/kg product)	Site-specific estimates from sheet 3.4a (CO2eq/ kg livestock product)	Choose production emissions to use	Production emissions used (CO2eq/kg product)
		Beef	5.6	0	Global average emissions	5.6
		Site-specific production emissions by animal category (kg CO2eq/kg output)
		Beef	43.8188
		Livestock product 3
		Enteric Emissions (CH4)
		Animal category	Global average emissions (CO2eq/kg product)	Site-specific emissions in CO2eq/kg product
				kg product/animal/year	Emissions per animal	Site-specific emissions per kg product	Default or site-specific emissions (drop down menu)	Emissions per unit product (kg CO2eq/kg product)
		Beef	26.7238			0	Livestock product default	26.7238
		Manure Management Emissions (CH4 and N2O)
		Animal category	Global average emissions (CO2eq/kg product)	Site-specific emissions in CO2eq/kg product
				kg product/animal/year	Emissions per animal	Site-specific emissions per kg product	Default or site-specific emissions (drop down menu)	Emissions per unit product (kg CO2eq/kg product)
		Beef	3.50999			0	Livestock product default	3.50999
		Pasture, Range and Paddock Emissions (PRP) (N2O)
		Animal category	Global average emissions (CO2eq/kg product)	Site-specific emissions in CO2eq/kg product
				kg DM/animal/year	Emissions per kg feed	Site-specific emissions per kg product	Default or site-specific emissions (drop down menu)	Emissions per unit product (kg CO2eq/kg product)
		Beef	7.98507			0	Livestock product default	7.98507
		Production emissions from feed production and energy use on-farm (including all feeds and pastures)
		Animal category	Global average emissions (CO2eq/kg product)	Site-specific estimates from sheet 3.4a (CO2eq/ kg livestock product)	Choose production emissions to use	Production emissions used (CO2eq/kg product)
		Beef	5.6	0	Global average emissions	5.6
		Site-specific production emissions by animal category (kg CO2eq/kg output)
		Beef	43.8188

## Sheet: 3.4a Site Feed PEMs New LU
		Site-Specific Production Emissions for Livestock Feeds and Energy Use on Farm
		Livestock Product 1		Beef
		Production emissions of non-pasture feeds
		Production emissions of all feeds (non-pasture)
		Feed Type	Default PEMs for feed (kg CO2eq/kg of feed)	Site-specific PEMs for feed (kg CO2eq/kg of feed)	Select to use default or site-specific PEMs in calculation.	Quantity of all feeds (on-farm or purchased) (kg/ha/y)	Livestock output yield (kg product/ha/yr)	PEMs for specific feed (CO2eq/kg animal product)
		Maize grains	0.461801		Default PEM		0	0
		Maize grains	0.461801		Default PEM		0	0
		Maize grains	0.461801		Default PEM		0	0
		Maize grains	0.461801		Default PEM		0	0
		Maize grains	0.461801		Default PEM		0	0
		Maize grains	0.461801		Default PEM		0	0
							Total	0
		Production emissions on pastures
		Nitrous Oxide for Nitrogen Applied to Pasture Other than Nitrogen Deposited by Grazing Animals
			Global average default factors
		Animal category for pasture or forage crop	Emissions % of input (N20-N/N fertilizer use)		Emissions CO2eq/N inputs (kg CO2eq/kg N inputs) Chose using default or user-defined value in dropdown menu below.	Quantity N fertilizer per hectare (kg/ha)	Quantity N from residues (kg/ha)	Quantity N from atmospheric deposition (kg/ha)	Total N inputs (kg/ha)	Total N20 emissions (kg CO2eq/ha)	Livestock output (kg product/ha/y)	Emissions per kg of output (kgCO2eq/ kg of output)
			Default value	User-defined value	Default value
		Beef	0.0145		6.79014				0	0	0	0
		Emissions from energy use for inputs used on pasture or in livestock management on farm
		Category of Energy Emissions			Default emissions factors (kg CO2eq/per kg of input)	Site-specific emission factors (kg CO2eq/per kg of input)	Chosen emission factors	Emission factors used in calculations (kg CO2eq/per kg of input)	Quantity of input per hectare (kg/ha)	Emissions per hectare (kg CO2eq/ha)	Livestock output (kg product/ha/y)	Emissions per kg of animal product output (kg CO2eq/ kg output)
		Nitrogen production & transportation			3.628		Energy use default emission factor	3.628		0	0	0
		Phosphorus production & transportation			1.238		Energy use default emission factor	1.238		0	0	0
		Potash production & transportation			0.818		Energy use default emission factor	0.818		0	0	0
		Pesticides (activie ingredient) production & transportation			28		Energy use default emission factor	28		0	0	0
		Energy use for tractors on pasture & other non-feed on-farm uses
		Energy type	Unit	Global average emission factor	Site-specific emission factor	Choose emission factor to be used	Quantity of energy type used (liters of fuel or kWh of electricity)	Emissions from fuel and energy use (kg CO2eq)	Livestock output (kg product/ha/y)	Total emissions per kg animal product output (kg CO2eq/kg product)
		Diesel	kgCO2eq/l	3.2		Use default values		0	0	0
		Gasoline	kgCO2eq/l	2.8		Use default values		0	0
		Electricity	kgCO2eq/kWh	0.62		Use default values		0	0
		Site-specific production emissions by animal category (kg CO2eq/kg output)
		Beef	0
		Livestock Product 2		Beef
		Production emissions of non-pasture feeds
		Production emissions of all feeds (non-pasture)
		Feed Type	Default PEMs for feed (kg CO2eq/kg of feed)	Site-specific PEMs for feed (kg CO2eq/kg of feed)	Select to use default or site-specific PEMs in calculation.	Quantity of all feeds (on-farm or purchased) (kg/ha/y)	Livestock output yield (kg product/ha/yr)	PEMs for specific feed (CO2eq/kg animal product)
		Maize grains	0.461801		Default PEM		0	0
		Maize grains	0.461801		Default PEM		0	0
		Maize grains	0.461801		Default PEM		0	0
		Maize grains	0.461801		Default PEM		0	0
		Maize grains	0.461801		Default PEM		0	0
		Maize grains	0.461801		Default PEM		0	0
							Total	0
		Production emissions on pastures
		Nitrous Oxide for Nitrogen Applied to Pasture Other than Nitrogen Deposited by Grazing Animals
			Global average default factors
		Animal category for pasture or forage crop	Emissions % of input (N20-N/N fertilizer use)		Emissions CO2eq/N inputs (kg CO2eq/kg N inputs) Chose using default or user-defined value in dropdown menu below.	Quantity N fertilizer per hectare (kg/ha)	Quantity N from residues (kg/ha)	Quantity N from atmospheric deposition (kg/ha)	Total N inputs (kg/ha)	Total N20 emissions (kg CO2eq/ha)	Livestock output (kg product/ha/y)	Emissions per kg of output (kgCO2eq/ kg of output)
			Default value	User-defined value	Default value
		Beef	0.0145		6.79014				0	0	0	0
		Emissions from energy use for inputs used on pasture or in livestock management on farm
		Category of Energy Emissions			Default emissions factors (kg CO2eq/per kg of input)	Site-specific emission factors (kg CO2eq/per kg of input)	Chosen emission factors	Emission factors used in calculations (kg CO2eq/per kg of input)	Quantity of input per hectare (kg/ha)	Emissions per hectare (kg CO2eq/ha)	Livestock output (kg product/ha/y)	Emissions per kg of animal product output (kg CO2eq/ kg output)
		Nitrogen production & transportation			3.628		Energy use default emission factor	3.628		0	0	0
		Phosphorus production & transportation			1.238		Energy use default emission factor	1.238		0	0	0
		Potash production & transportation			0.818		Energy use default emission factor	0.818		0	0	0
		Pesticides (activie ingredient) production & transportation			28		Energy use default emission factor	28		0	0	0
		Energy use for tractors & other on-farm uses
		Energy type	Unit	Global average emission factor	Site-specific emission factor	Choose emission factor to be used	Quantity of energy type used (liters of fuel or kWh of electricity)	Emissions from fuel and energy use (kg CO2eq)	Livestock output (kg product/ha/y)	Total emissions per kg animal product output (kg CO2eq/kg product)
		Diesel	kgCO2eq/l	3.2		Use default values		0	0	0
		Gasoline	kgCO2eq/l	2.8		Use default values		0	0
		Electricity	kgCO2eq/kWh	0.62		Use default values		0	0
		Site-specific production emissions by animal category (kg CO2eq/kg output)
		Beef	0
		Livestock Product 3		Beef
		Production emissions of non-pasture feeds
		Production emissions of all feeds (non-pasture)
		Feed Type	Default PEMs for feed (kg CO2eq/kg of feed)	Site-specific PEMs for feed (kg CO2eq/kg of feed)	Select to use default or site-specific PEMs in calculation.	Quantity of all feeds (on-farm or purchased) (kg/ha/y)	Livestock output yield (kg product/ha/yr)	PEMs for specific feed (CO2eq/kg animal product)
		Maize grains	0.461801		Default PEM		0	0
		Maize grains	0.461801		Default PEM		0	0
		Maize grains	0.461801		Default PEM		0	0
		Maize grains	0.461801		Default PEM		0	0
		Maize grains	0.461801		Default PEM		0	0
		Maize grains	0.461801		Default PEM		0	0
							Total	0
		Production emissions on pastures
		Nitrous Oxide for Nitrogen Applied to Pasture Other than Nitrogen Deposited by Grazing Animals
			Global average default factors
		Animal category for pasture or forage crop	Emissions % of input (N20-N/N fertilizer use)		Emissions CO2eq/N inputs (kg CO2eq/kg N inputs) Chose using default or user-defined value in dropdown menu below.	Quantity N fertilizer per hectare (kg/ha)	Quantity N from residues (kg/ha)	Quantity N from atmospheric deposition (kg/ha)	Total N inputs (kg/ha)	Total N20 emissions (kg CO2eq/ha)	Livestock output (kg product/ha/y)	Emissions per kg of output (kgCO2eq/ kg of output)
			Default value	User-defined value	Default value
		Beef	0.0145		6.79014				0	0	0	0
		Emissions from energy use for inputs used on pasture or in livestock management on farm
		Category of Energy Emissions			Default emissions factors (kg CO2eq/per kg of input)	Site-specific emission factors (kg CO2eq/per kg of input)	Chosen emission factors	Emission factors used in calculations (kg CO2eq/per kg of input)	Quantity of input per hectare (kg/ha)	Emissions per hectare (kg CO2eq/ha)	Livestock output (kg product/ha/y)	Emissions per kg of animal product output (kg CO2eq/ kg output)
		Nitrogen production & transportation			3.628		Energy use default emission factor	3.628		0	0	0
		Phosphorus production & transportation			1.238		Energy use default emission factor	1.238		0	0	0
		Potash production & transportation			0.818		Energy use default emission factor	0.818		0	0	0
		Pesticides (activie ingredient) production & transportation			28		Energy use default emission factor	28		0	0	0
		Energy use for tractors & other on-farm uses
		Energy type	Unit	Global average emission factor	Site-specific emission factor	Choose emission factor to be used	Quantity of energy type used (liters of fuel or kWh of electricity)	Emissions from fuel and energy use (kg CO2eq)	Livestock output (kg product/ha/y)	Total emissions per kg animal product output (kg CO2eq/kg product)
		Diesel	kgCO2eq/l	3.2		Use default values		0	0	0
		Gasoline	kgCO2eq/l	2.8		Use default values		0	0
		Electricity	kgCO2eq/kWh	0.62		Use default values		0	0
		Site-specific production emissions by animal category (kg CO2eq/kg output)
		Beef	0

## Sheet: 4 Bioenergy Savings CALC
			Bioenergy Savings Calculator (Existing Use or Management)
			Use default values
			Output Type	Anhydrous fuel ethanol (cane-based)
			Select calculation method for default PEMs:	Allocation
				Fuel output (MJ of biofuel/ kg of feedstock in dry matter)	PEM per MJ of biofuel (g CO2eq/MJ)	Emissions per MJ of gasoline or diesel (g CO2eq/MJ)
			Default values	7.26208	18.5403	90.5371
			User-defined values
			Savings per MJ of biofuel (g CO2eq/MJ)			71.9968
			Savings per kg of biomass (food or energy crop) (kg CO2eq/kg of crop)			0.522846
			Bioenergy Savings Calculator (Changed Use or Management)
			Use default values
			Output Type	Anhydrous fuel ethanol (maize-based)
			Select calculation method for default PEMs:	Allocation
				Fuel output (MJ of biofuel/ kg of feedstock in dry matter)	PEM per MJ of biofuel (g CO2eq/MJ)	Emissions per MJ of gasoline or diesel (g CO2eq/MJ)
			Default values	10.1444	59	90.5371
			User-defined values
			Savings per MJ of biofuel (g CO2eq/MJ)			31.5371
			Savings per kg of biomass (food or energy crop) (kg CO2eq/kg of crop)			0.319926

[truncated: 6 more sheets: 5 Carbon Stock Change CALC, 5a Ex-Use Ann Carb Stock Ch, 5b New Use Ann. Carb Stock Ch, 5c Background Data Carb Stock, 6 PEM & Bioenergy Savings Data, 7 (Calc Setup)]
