# Supplementary material for: Assessing the efficiency of changes in land use for mitigating climate change
Source: Springer Nature journal article supplement (doi:10.1038/s41586-018-0757-z), 2018-12-01
Supplement: 41586_2018_757_MOESM4_ESM.zip [file 41586_2018_757_MOESM4_ESM.zip]

Archive with 1 entries (1 files):
- Searchinger_EDfig4_raster_data.asc
