# Supplementary material for: Assessing the efficiency of changes in land use for mitigating climate change
Source: Springer Nature journal article supplement (doi:10.1038/s41586-018-0757-z), 2018-12-01
Supplement: 41586_2018_757_MOESM4_ESM.zip [file 41586_2018_757_MOESM4_ESM.zip › Searchinger_EDfig4_raster_data.asc]

NCOLS 720 
NROWS 360 
XLLCORNER -180 
YLLCORNER -90 
CELLSIZE 0.5 
NODATA_value -9999 
-9999.000000000000000 -9999 -9999 -9999 -9999 -9999 -9999 -9999 -9999 -9999 -9999 -9999 -9999 -9999 -9999 -9999 -9999 -9999 -9999 -9999 -9999 -9999 -9999 -9999 -9999 -9999 -9999 -9999 -9999 -9999 -9999 -9999 -9999 -9999 -9999 -9999 -9999 -9999 -9999 -9999 -9999 -9999 -9999 -9999 -9999 -9999 -9999 -9999 -9999 -9999 -9999 -9999 -9999 -9999 -9999 -9999 -9999 -9999 -9999 -9999 -9999 -9999 -9999 -9999 -9999 -9999 -9999 -9999 -9999 -9999 -9999 -9999 -9999 -9999 -9999 -9999 -9999 -9999 -9999 -9999 -9999 -9999 -9999 -9999 -9999 -9999 -9999 -9999 -9999 -9999 -9999 -9999 -9999 -9999 -9999 -9999 -9999 -9999 -9999 -9999 -9999 -9999 -9999 -9999 -9999 -9999 -9999 -9999 -9999 -9999 -9999 -9999 -9999 -9999 -9999 -9999 -9999 -9999 -9999 -9999 -9999 -9999 -9999 -9999 -9999 -9999 -9999 -9999 -9999 -9999 -9999 -9999 -9999 -9999 -9999 -9999 -9999 -9999 -9999 -9999 -9999 -9999 -9999 -9999 -9999 -9999 -9999 -9999 -9999 -9999 -9999 -9999 -9999 -9999 -9999 -9999 -9999 -9999 -9999 -9999 -9999 -9999 -9999 -9999 -9999 -9999 -9999 -9999 -9999 -9999 -9999 -9999 -9999 -9999 -9999 -9999 -9999 -9999 -9999 -9999 -9999 -9999 -9999 -9999 -9999 -9999 -9999 -9999 -9999 -9999 -9999 -9999 -9999 -9999 -9999 -9999 -9999 -9999 -9999 -9999 -9999 -9999 -9999 -9999 -9999 -9999 -9999 -9999 -9999 -9999 -9999 -9999 -9999 -9999 -9999 -9999 -9999 -9999 -9999 -9999 -9999 -9999 -9999 -9999 -9999 -9999 -9999 -9999 -9999 -9999 -9999 -9999 -9999 -9999 -9999 -9999 -9999 -9999 -9999 -9999 -9999 -9999 -9999 -9999 -9999 -9999 -9999 -9999 -9999 -9999 -9999 -9999 -9999 -9999 -9999 -9999 -9999 -9999 -9999 -9999 -9999 -9999 -9999 -9999 -9999 -9999 -9999 -9999 -9999 -9999 -9999 -9999 -9999 -9999 -9999 -9999 -9999 -9999 -9999 -9999 -9999 -9999 -9999 -9999 -9999 -9999 -9999 -9999 -9999 -9999 -9999 -9999 -9999 -9999 -9999 -9999 -9999 -9999 -9999 -9999 -9999 -9999 -9999 -9999 -9999 -9999 -9999 -9999 -9999 -9999 -9999 -9999 -9999 -9999 -9999 -9999 -9999 -9999 -9999 -9999 -9999 -9999 -9999 -9999 -9999 -9999 -9999 -9999 -9999 -9999 -9999 -9999 -9999 -9999 -9999 -9999 -9999 -9999 -9999 -9999 -9999 -9999 -9999 -9999 -9999 -9999 -9999 -9999 -9999 -9999 -9999 -9999 -9999 -9999 -9999 -9999 -9999 -9999 -9999 -9999 -9999 -9999 -9999 -9999 -9999 -9999 -9999 -9999 -9999 -9999 -9999 -9999 -9999 -9999 -9999 -9999 -9999 -9999 -9999 -9999 -9999 -9999 -9999 -9999 -9999 -9999 -9999 -9999 -9999 -9999 -9999 -9999 -9999 -9999 -9999 -9999 -9999 -9999 -9999 -9999 -9999 -9999 -9999 -9999 -9999 -9999 -9999 -9999 -9999 -9999 -9999 -9999 -9999 -9999 -9999 -9999 -9999 -9999 -9999 -9999 -9999 -9999 -9999 -9999 -9999 -9999 -9999 -9999 -9999 -9999 -9999 -9999 -9999 -9999 -9999 -9999 -9999 -9999 -9999 -9999 -9999 -9999 -9999 -9999 -9999 -9999 -9999 -9999 -9999 -9999 -9999 -9999 -9999 -9999 -9999 -9999 -9999 -9999 -9999 -9999 -9999 -9999 -9999 -9999 -9999 -9999 -9999 -9999 -9999 -9999 -9999 -9999 -9999 -9999 -9999 -9999 -9999 -9999 -9999 -9999 -9999 -9999 -9999 -9999 -9999 -9999 -9999 -9999 -9999 -9999 -9999 -9999 -9999 -9999 -9999 -9999 -9999 -9999 -9999 -9999 -9999 -9999 -9999 -9999 -9999 -9999 -9999 -9999 -9999 -9999 -9999 -9999 -9999 -9999 -9999 -9999 -9999 -9999 -9999 -9999 -9999 -9999 -9999 -9999 -9999 -9999 -9999 -9999 -9999 -9999 -9999 -9999 -9999 -9999 -9999 -9999 -9999 -9999 -9999 -9999 -9999 -9999 -9999 -9999 -9999 -9999 -9999 -9999 -9999 -9999 -9999 -9999 -9999 -9999 -9999 -9999 -9999 -9999 -9999 -9999 -9999 -9999 -9999 -9999 -9999 -9999 -9999 -9999 -9999 -9999 -9999 -9999 -9999 -9999 -9999 -9999 -9999 -9999 -9999 -9999 -9999 -9999 -9999 -9999 -9999 -9999 -9999 -9999 -9999 -9999 -9999 -9999 -9999 -9999 -9999 -9999 -9999 -9999 -9999 -9999 -9999 -9999 -9999 -9999 -9999 -9999 -9999 -9999 -9999 -9999 -9999 -9999 -9999 -9999 -9999 -9999 -9999 -9999 -9999 -9999 -9999 -9999 -9999 -9999 -9999 -9999 -9999 -9999 -9999 -9999 -9999 -9999 -9999 -9999 -9999 -9999 -9999 -9999 -9999 -9999 -9999 -9999 -9999 -9999 -9999 -9999 -9999 -9999 -9999 -9999 -9999 -9999 -9999 -9999 -9999 -9999 -9999 -9999 -9999 -9999 -9999 -9999 -9999 -9999 -9999 -9999 -9999 -9999 -9999 -9999 -9999 -9999 -9999 -9999 -9999 -9999 -9999 -9999 -9999 -9999 -9999 -9999 -9999 -9999 -9999 -9999 -9999 -9999 -9999 -9999 -9999 -9999 -9999 -9999 -9999 -9999 -9999 -9999 -9999 -9999 -9999 -9999 -9999 -9999 -9999 -9999 -9999 -9999 -9999 -9999 -9999 -9999 -9999 -9999 -9999 -9999 -9999 -9999 -9999 -9999
-9999 -9999 -9999 -9999 -9999 -9999 -9999 -9999 -9999 -9999 -9999 -9999 -9999 -9999 -9999 -9999 -9999 -9999 -9999 -9999 -9999 -9999 -9999 -9999 -9999 -9999 -9999 -9999 -9999 -9999 -9999 -9999 -9999 -9999 -9999 -9999 -9999 -9999 -9999 -9999 -9999 -9999 -9999 -9999 -9999 -9999 -9999 -9999 -9999 -9999 -9999 -9999 -9999 -9999 -9999 -9999 -9999 -9999 -9999 -9999 -9999 -9999 -9999 -9999 -9999 -9999 -9999 -9999 -9999 -9999 -9999 -9999 -9999 -9999 -9999 -9999 -9999 -9999 -9999 -9999 -9999 -9999 -9999 -9999 -9999 -9999 -9999 -9999 -9999 -9999 -9999 -9999 -9999 -9999 -9999 -9999 -9999 -9999 -9999 -9999 -9999 -9999 -9999 -9999 -9999 -9999 -9999 -9999 -9999 -9999 -9999 -9999 -9999 -9999 -9999 -9999 -9999 -9999 -9999 -9999 -9999 -9999 -9999 -9999 -9999 -9999 -9999 -9999 -9999 -9999 -9999 -9999 -9999 -9999 -9999 -9999 -9999 -9999 -9999 -9999 -9999 -9999 -9999 -9999 -9999 -9999 -9999 -9999 -9999 -9999 -9999 -9999 -9999 -9999 -9999 -9999 -9999 -9999 -9999 -9999 -9999 -9999 -9999 -9999 -9999 -9999 -9999 -9999 -9999 -9999 -9999 -9999 -9999 -9999 -9999 -9999 -9999 -9999 -9999 -9999 -9999 -9999 -9999 -9999 -9999 -9999 -9999 -9999 -9999 -9999 -9999 -9999 -9999 -9999 -9999 -9999 -9999 -9999 -9999 -9999 -9999 -9999 -9999 -9999 -9999 -9999 -9999 -9999 -9999 -9999 -9999 -9999 -9999 -9999 -9999 -9999 -9999 -9999 -9999 -9999 -9999 -9999 -9999 -9999 -9999 -9999 -9999 -9999 -9999 -9999 -9999 -9999 -9999 -9999 -9999 -9999 -9999 -9999 -9999 -9999 -9999 -9999 -9999 -9999 -9999 -9999 -9999 -9999 -9999 -9999 -9999 -9999 -9999 -9999 -9999 -9999 -9999 -9999 -9999 -9999 -9999 -9999 -9999 -9999 -9999 -9999 -9999 -9999 -9999 -9999 -9999 -9999 -9999 -9999 -9999 -9999 -9999 -9999 -9999 -9999 -9999 -9999 -9999 -9999 -9999 -9999 -9999 -9999 -9999 -9999 -9999 -9999 -9999 -9999 -9999 -9999 -9999 -9999 -9999 -9999 -9999 -9999 -9999 -9999 -9999 -9999 -9999 -9999 -9999 -9999 -9999 -9999 -9999 -9999 -9999 -9999 -9999 -9999 -9999 -9999 -9999 -9999 -9999 -9999 -9999 -9999 -9999 -9999 -9999 -9999 -9999 -9999 -9999 -9999 -9999 -9999 -9999 -9999 -9999 -9999 -9999 -9999 -9999 -9999 -9999 -9999 -9999 -9999 -9999 -9999 -9999 -9999 -9999 -9999 -9999 -9999 -9999 -9999 -9999 -9999 -9999 -9999 -9999 -9999 -9999 -9999 -9999 -9999 -9999 -9999 -9999 -9999 -9999 -9999 -9999 -9999 -9999 -9999 -9999 -9999 -9999 -9999 -9999 -9999 -9999 -9999 -9999 -9999 -9999 -9999 -9999 -9999 -9999 -9999 -9999 -9999 -9999 -9999 -9999 -9999 -9999 -9999 -9999 -9999 -9999 -9999 -9999 -9999 -9999 -9999 -9999 -9999 -9999 -9999 -9999 -9999 -9999 -9999 -9999 -9999 -9999 -9999 -9999 -9999 -9999 -9999 -9999 -9999 -9999 -9999 -9999 -9999 -9999 -9999 -9999 -9999 -9999 -9999 -9999 -9999 -9999 -9999 -9999 -9999 -9999 -9999 -9999 -9999 -9999 -9999 -9999 -9999 -9999 -9999 -9999 -9999 -9999 -9999 -9999 -9999 -9999 -9999 -9999 -9999 -9999 -9999 -9999 -9999 -9999 -9999 -9999 -9999 -9999 -9999 -9999 -9999 -9999 -9999 -9999 -9999 -9999 -9999 -9999 -9999 -9999 -9999 -9999 -9999 -9999 -9999 -9999 -9999 -9999 -9999 -9999 -9999 -9999 -9999 -9999 -9999 -9999 -9999 -9999 -9999 -9999 -9999 -9999 -9999 -9999 -9999 -9999 -9999 -9999 -9999 -9999 -9999 -9999 -9999 -9999 -9999 -9999 -9999 -9999 -9999 -9999 -9999 -9999 -9999 -9999 -9999 -9999 -9999 -9999 -9999 -9999 -9999 -9999 -9999 -9999 -9999 -9999 -9999 -9999 -9999 -9999 -9999 -9999 -9999 -9999 -9999 -9999 -9999 -9999 -9999 -9999 -9999 -9999 -9999 -9999 -9999 -9999 -9999 -9999 -9999 -9999 -9999 -9999 -9999 -9999 -9999 -9999 -9999 -9999 -9999 -9999 -9999 -9999 -9999 -9999 -9999 -9999 -9999 -9999 -9999 -9999 -9999 -9999 -9999 -9999 -9999 -9999 -9999 -9999 -9999 -9999 -9999 -9999 -9999 -9999 -9999 -9999 -9999 -9999 -9999 -9999 -9999 -9999 -9999 -9999 -9999 -9999 -9999 -9999 -9999 -9999 -9999 -9999 -9999 -9999 -9999 -9999 -9999 -9999 -9999 -9999 -9999 -9999 -9999 -9999 -9999 -9999 -9999 -9999 -9999 -9999 -9999 -9999 -9999 -9999 -9999 -9999 -9999 -9999 -9999 -9999 -9999 -9999 -9999 -9999 -9999 -9999 -9999 -9999 -9999 -9999 -9999 -9999 -9999 -9999 -9999 -9999 -9999 -9999 -9999 -9999 -9999 -9999 -9999 -9999 -9999 -9999 -9999 -9999 -9999 -9999 -9999 -9999 -9999 -9999 -9999 -9999 -9999 -9999 -9999 -9999 -9999 -9999 -9999 -9999 -9999 -9999 -9999 -9999 -9999 -9999 -9999 -9999 -9999 -9999 -9999 -9999 -9999 -9999 -9999 -9999 -9999 -9999 -9999 -9999 -9999 -9999 -9999 -9999 -9999 -9999 -9999 -9999 -9999 -9999 -9999
-9999 -9999 -9999 -9999 -9999 -9999 -9999 -9999 -9999 -9999 -9999 -9999 -9999 -9999 -9999 -9999 -9999 -9999 -9999 -9999 -9999 -9999 -9999 -9999 -9999 -9999 -9999 -9999 -9999 -9999 -9999 -9999 -9999 -9999 -9999 -9999 -9999 -9999 -9999 -9999 -9999 -9999 -9999 -9999 -9999 -9999 -9999 -9999 -9999 -9999 -9999 -9999 -9999 -9999 -9999 -9999 -9999 -9999 -9999 -9999 -9999 -9999 -9999 -9999 -9999 -9999 -9999 -9999 -9999 -9999 -9999 -9999 -9999 -9999 -9999 -9999 -9999 -9999 -9999 -9999 -9999 -9999 -9999 -9999 -9999 -9999 -9999 -9999 -9999 -9999 -9999 -9999 -9999 -9999 -9999 -9999 -9999 -9999 -9999 -9999 -9999 -9999 -9999 -9999 -9999 -9999 -9999 -9999 -9999 -9999 -9999 -9999 -9999 -9999 -9999 -9999 -9999 -9999 -9999 -9999 -9999 -9999 -9999 -9999 -9999 -9999 -9999 -9999 -9999 -9999 -9999 -9999 -9999 -9999 -9999 -9999 -9999 -9999 -9999 -9999 -9999 -9999 -9999 -9999 -9999 -9999 -9999 -9999 -9999 -9999 -9999 -9999 -9999 -9999 -9999 -9999 -9999 -9999 -9999 -9999 -9999 -9999 -9999 -9999 -9999 -9999 -9999 -9999 -9999 -9999 -9999 -9999 -9999 -9999 -9999 -9999 -9999 -9999 -9999 -9999 -9999 -9999 -9999 -9999 -9999 -9999 -9999 -9999 -9999 -9999 -9999 -9999 -9999 -9999 -9999 -9999 -9999 -9999 -9999 -9999 -9999 -9999 -9999 -9999 -9999 -9999 -9999 -9999 -9999 -9999 -9999 -9999 -9999 -9999 -9999 -9999 -9999 -9999 -9999 -9999 -9999 -9999 -9999 -9999 -9999 -9999 -9999 -9999 -9999 -9999 -9999 -9999 -9999 -9999 -9999 -9999 -9999 -9999 -9999 -9999 -9999 -9999 -9999 -9999 -9999 -9999 -9999 -9999 -9999 -9999 -9999 -9999 -9999 -9999 -9999 -9999 -9999 -9999 -9999 -9999 -9999 -9999 -9999 -9999 -9999 -9999 -9999 -9999 -9999 -9999 -9999 -9999 -9999 -9999 -9999 -9999 -9999 -9999 -9999 -9999 -9999 -9999 -9999 -9999 -9999 -9999 -9999 -9999 -9999 -9999 -9999 -9999 -9999 -9999 -9999 -9999 -9999 -9999 -9999 -9999 -9999 -9999 -9999 -9999 -9999 -9999 -9999 -9999 -9999 -9999 -9999 -9999 -9999 -9999 -9999 -9999 -9999 -9999 -9999 -9999 -9999 -9999 -9999 -9999 -9999 -9999 -9999 -9999 -9999 -9999 -9999 -9999 -9999 -9999 -9999 -9999 -9999 -9999 -9999 -9999 -9999 -9999 -9999 -9999 -9999 -9999 -9999 -9999 -9999 -9999 -9999 -9999 -9999 -9999 -9999 -9999 -9999 -9999 -9999 -9999 -9999 -9999 -9999 -9999 -9999 -9999 -9999 -9999 -9999 -9999 -9999 -9999 -9999 -9999 -9999 -9999 -9999 -9999 -9999 -9999 -9999 -9999 -9999 -9999 -9999 -9999 -9999 -9999 -9999 -9999 -9999 -9999 -9999 -9999 -9999 -9999 -9999 -9999 -9999 -9999 -9999 -9999 -9999 -9999 -9999 -9999 -9999 -9999 -9999 -9999 -9999 -9999 -9999 -9999 -9999 -9999 -9999 -9999 -9999 -9999 -9999 -9999 -9999 -9999 -9999 -9999 -9999 -9999 -9999 -9999 -9999 -9999 -9999 -9999 -9999 -9999 -9999 -9999 -9999 -9999 -9999 -9999 -9999 -9999 -9999 -9999 -9999 -9999 -9999 -9999 -9999 -9999 -9999 -9999 -9999 -9999 -9999 -9999 -9999 -9999 -9999 -9999 -9999 -9999 -9999 -9999 -9999 -9999 -9999 -9999 -9999 -9999 -9999 -9999 -9999 -9999 -9999 -9999 -9999 -9999 -9999 -9999 -9999 -9999 -9999 -9999 -9999 -9999 -9999 -9999 -9999 -9999 -9999 -9999 -9999 -9999 -9999 -9999 -9999 -9999 -9999 -9999 -9999 -9999 -9999 -9999 -9999 -9999 -9999 -9999 -9999 -9999 -9999 -9999 -9999 -9999 -9999 -9999 -9999 -9999 -9999 -9999 -9999 -9999 -9999 -9999 -9999 -9999 -9999 -9999 -9999 -9999 -9999 -9999 -9999 -9999 -9999 -9999 -9999 -9999 -9999 -9999 -9999 -9999 -9999 -9999 -9999 -9999 -9999 -9999 -9999 -9999 -9999 -9999 -9999 -9999 -9999 -9999 -9999 -9999 -9999 -9999 -9999 -9999 -9999 -9999 -9999 -9999 -9999 -9999 -9999 -9999 -9999 -9999 -9999 -9999 -9999 -9999 -9999 -9999 -9999 -9999 -9999 -9999 -9999 -9999 -9999 -9999 -9999 -9999 -9999 -9999 -9999 -9999 -9999 -9999 -9999 -9999 -9999 -9999 -9999 -9999 -9999 -9999 -9999 -9999 -9999 -9999 -9999 -9999 -9999 -9999 -9999 -9999 -9999 -9999 -9999 -9999 -9999 -9999 -9999 -9999 -9999 -9999 -9999 -9999 -9999 -9999 -9999 -9999 -9999 -9999 -9999 -9999 -9999 -9999 -9999 -9999 -9999 -9999 -9999 -9999 -9999 -9999 -9999 -9999 -9999 -9999 -9999 -9999 -9999 -9999 -9999 -9999 -9999 -9999 -9999 -9999 -9999 -9999 -9999 -9999 -9999 -9999 -9999 -9999 -9999 -9999 -9999 -9999 -9999 -9999 -9999 -9999 -9999 -9999 -9999 -9999 -9999 -9999 -9999 -9999 -9999 -9999 -9999 -9999 -9999 -9999 -9999 -9999 -9999 -9999 -9999 -9999 -9999 -9999 -9999 -9999 -9999 -9999 -9999 -9999 -9999 -9999 -9999 -9999 -9999 -9999 -9999 -9999 -9999 -9999 -9999 -9999 -9999 -9999 -9999 -9999 -9999 -9999
-9999 -9999 -9999 -9999 -9999 -9999 -9999 -9999 -9999 -9999 -9999 -9999 -9999 -9999 -9999 -9999 -9999 -9999 -9999 -9999 -9999 -9999 -9999 -9999 -9999 -9999 -9999 -9999 -9999 -9999 -9999 -9999 -9999 -9999 -9999 -9999 -9999 -9999 -9999 -9999 -9999 -9999 -9999 -9999 -9999 -9999 -9999 -9999 -9999 -9999 -9999 -9999 -9999 -9999 -9999 -9999 -9999 -9999 -9999 -9999 -9999 -9999 -9999 -9999 -9999 -9999 -9999 -9999 -9999 -9999 -9999 -9999 -9999 -9999 -9999 -9999 -9999 -9999 -9999 -9999 -9999 -9999 -9999 -9999 -9999 -9999 -9999 -9999 -9999 -9999 -9999 -9999 -9999 -9999 -9999 -9999 -9999 -9999 -9999 -9999 -9999 -9999 -9999 -9999 -9999 -9999 -9999 -9999 -9999 -9999 -9999 -9999 -9999 -9999 -9999 -9999 -9999 -9999 -9999 -9999 -9999 -9999 -9999 -9999 -9999 -9999 -9999 -9999 -9999 -9999 -9999 -9999 -9999 -9999 -9999 -9999 -9999 -9999 -9999 -9999 -9999 -9999 -9999 -9999 -9999 -9999 -9999 -9999 -9999 -9999 -9999 -9999 -9999 -9999 -9999 -9999 -9999 -9999 -9999 -9999 -9999 -9999 -9999 -9999 -9999 -9999 -9999 -9999 -9999 -9999 -9999 -9999 -9999 -9999 -9999 -9999 -9999 -9999 -9999 -9999 -9999 -9999 -9999 -9999 -9999 -9999 -9999 -9999 -9999 -9999 -9999 -9999 -9999 -9999 -9999 -9999 -9999 -9999 -9999 -9999 -9999 -9999 -9999 -9999 -9999 -9999 -9999 -9999 -9999 -9999 -9999 -9999 -9999 -9999 -9999 -9999 -9999 -9999 -9999 -9999 -9999 -9999 -9999 -9999 -9999 -9999 -9999 -9999 -9999 -9999 -9999 -9999 -9999 -9999 -9999 -9999 -9999 -9999 -9999 -9999 -9999 -9999 -9999 -9999 -9999 -9999 -9999 -9999 -9999 -9999 -9999 -9999 -9999 -9999 -9999 -9999 -9999 -9999 -9999 -9999 -9999 -9999 -9999 -9999 -9999 -9999 -9999 -9999 -9999 -9999 -9999 -9999 -9999 -9999 -9999 -9999 -9999 -9999 -9999 -9999 -9999 -9999 -9999 -9999 -9999 -9999 -9999 -9999 -9999 -9999 -9999 -9999 -9999 -9999 -9999 -9999 -9999 -9999 -9999 -9999 -9999 -9999 -9999 -9999 -9999 -9999 -9999 -9999 -9999 -9999 -9999 -9999 -9999 -9999 -9999 -9999 -9999 -9999 -9999 -9999 -9999 -9999 -9999 -9999 -9999 -9999 -9999 -9999 -9999 -9999 -9999 -9999 -9999 -9999 -9999 -9999 -9999 -9999 -9999 -9999 -9999 -9999 -9999 -9999 -9999 -9999 -9999 -9999 -9999 -9999 -9999 -9999 -9999 -9999 -9999 -9999 -9999 -9999 -9999 -9999 -9999 -9999 -9999 -9999 -9999 -9999 -9999 -9999 -9999 -9999 -9999 -9999 -9999 -9999 -9999 -9999 -9999 -9999 -9999 -9999 -9999 -9999 -9999 -9999 -9999 -9999 -9999 -9999 -9999 -9999 -9999 -9999 -9999 -9999 -9999 -9999 -9999 -9999 -9999 -9999 -9999 -9999 -9999 -9999 -9999 -9999 -9999 -9999 -9999 -9999 -9999 -9999 -9999 -9999 -9999 -9999 -9999 -9999 -9999 -9999 -9999 -9999 -9999 -9999 -9999 -9999 -9999 -9999 -9999 -9999 -9999 -9999 -9999 -9999 -9999 -9999 -9999 -9999 -9999 -9999 -9999 -9999 -9999 -9999 -9999 -9999 -9999 -9999 -9999 -9999 -9999 -9999 -9999 -9999 -9999 -9999 -9999 -9999 -9999 -9999 -9999 -9999 -9999 -9999 -9999 -9999 -9999 -9999 -9999 -9999 -9999 -9999 -9999 -9999 -9999 -9999 -9999 -9999 -9999 -9999 -9999 -9999 -9999 -9999 -9999 -9999 -9999 -9999 -9999 -9999 -9999 -9999 -9999 -9999 -9999 -9999 -9999 -9999 -9999 -9999 -9999 -9999 -9999 -9999 -9999 -9999 -9999 -9999 -9999 -9999 -9999 -9999 -9999 -9999 -9999 -9999 -9999 -9999 -9999 -9999 -9999 -9999 -9999 -9999 -9999 -9999 -9999 -9999 -9999 -9999 -9999 -9999 -9999 -9999 -9999 -9999 -9999 -9999 -9999 -9999 -9999 -9999 -9999 -9999 -9999 -9999 -9999 -9999 -9999 -9999 -9999 -9999 -9999 -9999 -9999 -9999 -9999 -9999 -9999 -9999 -9999 -9999 -9999 -9999 -9999 -9999 -9999 -9999 -9999 -9999 -9999 -9999 -9999 -9999 -9999 -9999 -9999 -9999 -9999 -9999 -9999 -9999 -9999 -9999 -9999 -9999 -9999 -9999 -9999 -9999 -9999 -9999 -9999 -9999 -9999 -9999 -9999 -9999 -9999 -9999 -9999 -9999 -9999 -9999 -9999 -9999 -9999 -9999 -9999 -9999 -9999 -9999 -9999 -9999 -9999 -9999 -9999 -9999 -9999 -9999 -9999 -9999 -9999 -9999 -9999 -9999 -9999 -9999 -9999 -9999 -9999 -9999 -9999 -9999 -9999 -9999 -9999 -9999 -9999 -9999 -9999 -9999 -9999 -9999 -9999 -9999 -9999 -9999 -9999 -9999 -9999 -9999 -9999 -9999 -9999 -9999 -9999 -9999 -9999 -9999 -9999 -9999 -9999 -9999 -9999 -9999 -9999 -9999 -9999 -9999 -9999 -9999 -9999 -9999 -9999 -9999 -9999 -9999 -9999 -9999 -9999 -9999 -9999 -9999 -9999 -9999 -9999 -9999 -9999 -9999 -9999 -9999 -9999 -9999 -9999 -9999 -9999 -9999 -9999 -9999 -9999 -9999 -9999 -9999 -9999 -9999 -9999 -9999 -9999 -9999 -9999 -9999 -9999 -9999 -9999 -9999 -9999 -9999 -9999 -9999
-9999 -9999 -9999 -9999 -9999 -9999 -9999 -9999 -9999 -9999 -9999 -9999 -9999 -9999 -9999 -9999 -9999 -9999 -9999 -9999 -9999 -9999 -9999 -9999 -9999 -9999 -9999 -9999 -9999 -9999 -9999 -9999 -9999 -9999 -9999 -9999 -9999 -9999 -9999 -9999 -9999 -9999 -9999 -9999 -9999 -9999 -9999 -9999 -9999 -9999 -9999 -9999 -9999 -9999 -9999 -9999 -9999 -9999 -9999 -9999 -9999 -9999 -9999 -9999 -9999 -9999 -9999 -9999 -9999 -9999 -9999 -9999 -9999 -9999 -9999 -9999 -9999 -9999 -9999 -9999 -9999 -9999 -9999 -9999 -9999 -9999 -9999 -9999 -9999 -9999 -9999 -9999 -9999 -9999 -9999 -9999 -9999 -9999 -9999 -9999 -9999 -9999 -9999 -9999 -9999 -9999 -9999 -9999 -9999 -9999 -9999 -9999 -9999 -9999 -9999 -9999 -9999 -9999 -9999 -9999 -9999 -9999 -9999 -9999 -9999 -9999 -9999 -9999 -9999 -9999 -9999 -9999 -9999 -9999 -9999 -9999 -9999 -9999 -9999 -9999 -9999 -9999 -9999 -9999 -9999 -9999 -9999 -9999 -9999 -9999 -9999 -9999 -9999 -9999 -9999 -9999 -9999 -9999 -9999 -9999 -9999 -9999 -9999 -9999 -9999 -9999 -9999 -9999 -9999 -9999 -9999 -9999 -9999 -9999 -9999 -9999 -9999 -9999 -9999 -9999 -9999 -9999 -9999 -9999 -9999 -9999 -9999 -9999 -9999 -9999 -9999 -9999 -9999 -9999 -9999 -9999 -9999 -9999 -9999 -9999 -9999 -9999 -9999 -9999 -9999 -9999 -9999 -9999 -9999 -9999 -9999 -9999 -9999 -9999 -9999 -9999 -9999 -9999 -9999 -9999 -9999 -9999 -9999 -9999 -9999 -9999 -9999 -9999 -9999 -9999 -9999 -9999 -9999 -9999 -9999 -9999 -9999 -9999 -9999 -9999 -9999 -9999 -9999 -9999 -9999 -9999 -9999 -9999 -9999 -9999 -9999 -9999 -9999 -9999 -9999 -9999 -9999 -9999 -9999 -9999 -9999 -9999 -9999 -9999 -9999 -9999 -9999 -9999 -9999 -9999 -9999 -9999 -9999 -9999 -9999 -9999 -9999 -9999 -9999 -9999 -9999 -9999 -9999 -9999 -9999 -9999 -9999 -9999 -9999 -9999 -9999 -9999 -9999 -9999 -9999 -9999 -9999 -9999 -9999 -9999 -9999 -9999 -9999 -9999 -9999 -9999 -9999 -9999 -9999 -9999 -9999 -9999 -9999 -9999 -9999 -9999 -9999 -9999 -9999 -9999 -9999 -9999 -9999 -9999 -9999 -9999 -9999 -9999 -9999 -9999 -9999 -9999 -9999 -9999 -9999 -9999 -9999 -9999 -9999 -9999 -9999 -9999 -9999 -9999 -9999 -9999 -9999 -9999 -9999 -9999 -9999 -9999 -9999 -9999 -9999 -9999 -9999 -9999 -9999 -9999 -9999 -9999 -9999 -9999 -9999 -9999 -9999 -9999 -9999 -9999 -9999 -9999 -9999 -9999 -9999 -9999 -9999 -9999 -9999 -9999 -9999 -9999 -9999 -9999 -9999 -9999 -9999 -9999 -9999 -9999 -9999 -9999 -9999 -9999 -9999 -9999 -9999 -9999 -9999 -9999 -9999 -9999 -9999 -9999 -9999 -9999 -9999 -9999 -9999 -9999 -9999 -9999 -9999 -9999 -9999 -9999 -9999 -9999 -9999 -9999 -9999 -9999 -9999 -9999 -9999 -9999 -9999 -9999 -9999 -9999 -9999 -9999 -9999 -9999 -9999 -9999 -9999 -9999 -9999 -9999 -9999 -9999 -9999 -9999 -9999 -9999 -9999 -9999 -9999 -9999 -9999 -9999 -9999 -9999 -9999 -9999 -9999 -9999 -9999 -9999 -9999 -9999 -9999 -9999 -9999 -9999 -9999 -9999 -9999 -9999 -9999 -9999 -9999 -9999 -9999 -9999 -9999 -9999 -9999 -9999 -9999 -9999 -9999 -9999 -9999 -9999 -9999 -9999 -9999 -9999 -9999 -9999 -9999 -9999 -9999 -9999 -9999 -9999 -9999 -9999 -9999 -9999 -9999 -9999 -9999 -9999 -9999 -9999 -9999 -9999 -9999 -9999 -9999 -9999 -9999 -9999 -9999 -9999 -9999 -9999 -9999 -9999 -9999 -9999 -9999 -9999 -9999 -9999 -9999 -9999 -9999 -9999 -9999 -9999 -9999 -9999 -9999 -9999 -9999 -9999 -9999 -9999 -9999 -9999 -9999 -9999 -9999 -9999 -9999 -9999 -9999 -9999 -9999 -9999 -9999 -9999 -9999 -9999 -9999 -9999 -9999 -9999 -9999 -9999 -9999 -9999 -9999 -9999 -9999 -9999 -9999 -9999 -9999 -9999 -9999 -9999 -9999 -9999 -9999 -9999 -9999 -9999 -9999 -9999 -9999 -9999 -9999 -9999 -9999 -9999 -9999 -9999 -9999 -9999 -9999 -9999 -9999 -9999 -9999 -9999 -9999 -9999 -9999 -9999 -9999 -9999 -9999 -9999 -9999 -9999 -9999 -9999 -9999 -9999 -9999 -9999 -9999 -9999 -9999 -9999 -9999 -9999 -9999 -9999 -9999 -9999 -9999 -9999 -9999 -9999 -9999 -9999 -9999 -9999 -9999 -9999 -9999 -9999 -9999 -9999 -9999 -9999 -9999 -9999 -9999 -9999 -9999 -9999 -9999 -9999 -9999 -9999 -9999 -9999 -9999 -9999 -9999 -9999 -9999 -9999 -9999 -9999 -9999 -9999 -9999 -9999 -9999 -9999 -9999 -9999 -9999 -9999 -9999 -9999 -9999 -9999 -9999 -9999 -9999 -9999 -9999 -9999 -9999 -9999 -9999 -9999 -9999 -9999 -9999 -9999 -9999 -9999 -9999 -9999 -9999 -9999 -9999 -9999 -9999 -9999 -9999 -9999 -9999 -9999 -9999 -9999 -9999 -9999 -9999 -9999 -9999 -9999 -9999 -9999 -9999 -9999 -9999 -9999 -9999 -9999
-9999 -9999 -9999 -9999 -9999 -9999 -9999 -9999 -9999 -9999 -9999 -9999 -9999 -9999 -9999 -9999 -9999 -9999 -9999 -9999 -9999 -9999 -9999 -9999 -9999 -9999 -9999 -9999 -9999 -9999 -9999 -9999 -9999 -9999 -9999 -9999 -9999 -9999 -9999 -9999 -9999 -9999 -9999 -9999 -9999 -9999 -9999 -9999 -9999 -9999 -9999 -9999 -9999 -9999 -9999 -9999 -9999 -9999 -9999 -9999 -9999 -9999 -9999 -9999 -9999 -9999 -9999 -9999 -9999 -9999 -9999 -9999 -9999 -9999 -9999 -9999 -9999 -9999 -9999 -9999 -9999 -9999 -9999 -9999 -9999 -9999 -9999 -9999 -9999 -9999 -9999 -9999 -9999 -9999 -9999 -9999 -9999 -9999 -9999 -9999 -9999 -9999 -9999 -9999 -9999 -9999 -9999 -9999 -9999 -9999 -9999 -9999 -9999 -9999 -9999 -9999 -9999 -9999 -9999 -9999 -9999 -9999 -9999 -9999 -9999 -9999 -9999 -9999 -9999 -9999 -9999 -9999 -9999 -9999 -9999 -9999 -9999 -9999 -9999 -9999 -9999 -9999 -9999 -9999 -9999 -9999 -9999 -9999 -9999 -9999 -9999 -9999 -9999 -9999 -9999 -9999 -9999 -9999 -9999 -9999 -9999 -9999 -9999 -9999 -9999 -9999 -9999 -9999 -9999 -9999 -9999 -9999 -9999 -9999 -9999 -9999 -9999 -9999 -9999 -9999 -9999 -9999 -9999 -9999 -9999 -9999 -9999 -9999 -9999 -9999 -9999 -9999 -9999 -9999 -9999 -9999 -9999 -9999 -9999 -9999 -9999 -9999 -9999 -9999 -9999 -9999 -9999 -9999 -9999 -9999 -9999 -9999 -9999 -9999 -9999 -9999 -9999 -9999 -9999 -9999 -9999 -9999 -9999 -9999 -9999 -9999 -9999 -9999 -9999 -9999 -9999 -9999 -9999 -9999 -9999 -9999 -9999 -9999 -9999 -9999 -9999 -9999 -9999 -9999 -9999 -9999 -9999 -9999 -9999 -9999 -9999 -9999 -9999 -9999 -9999 -9999 -9999 -9999 -9999 -9999 -9999 -9999 -9999 -9999 -9999 -9999 -9999 -9999 -9999 -9999 -9999 -9999 -9999 -9999 -9999 -9999 -9999 -9999 -9999 -9999 -9999 -9999 -9999 -9999 -9999 -9999 -9999 -9999 -9999 -9999 -9999 -9999 -9999 -9999 -9999 -9999 -9999 -9999 -9999 -9999 -9999 -9999 -9999 -9999 -9999 -9999 -9999 -9999 -9999 -9999 -9999 -9999 -9999 -9999 -9999 -9999 -9999 -9999 -9999 -9999 -9999 -9999 -9999 -9999 -9999 -9999 -9999 -9999 -9999 -9999 -9999 -9999 -9999 -9999 -9999 -9999 -9999 -9999 -9999 -9999 -9999 -9999 -9999 -9999 -9999 -9999 -9999 -9999 -9999 -9999 -9999 -9999 -9999 -9999 -9999 -9999 -9999 -9999 -9999 -9999 -9999 -9999 -9999 -9999 -9999 -9999 -9999 -9999 -9999 -9999 -9999 -9999 -9999 -9999 -9999 -9999 -9999 -9999 -9999 -9999 -9999 -9999 -9999 -9999 -9999 -9999 -9999 -9999 -9999 -9999 -9999 -9999 -9999 -9999 -9999 -9999 -9999 -9999 -9999 -9999 -9999 -9999 -9999 -9999 -9999 -9999 -9999 -9999 -9999 -9999 -9999 -9999 -9999 -9999 -9999 -9999 -9999 -9999 -9999 -9999 -9999 -9999 -9999 -9999 -9999 -9999 -9999 -9999 -9999 -9999 -9999 -9999 -9999 -9999 -9999 -9999 -9999 -9999 -9999 -9999 -9999 -9999 -9999 -9999 -9999 -9999 -9999 -9999 -9999 -9999 -9999 -9999 -9999 -9999 -9999 -9999 -9999 -9999 -9999 -9999 -9999 -9999 -9999 -9999 -9999 -9999 -9999 -9999 -9999 -9999 -9999 -9999 -9999 -9999 -9999 -9999 -9999 -9999 -9999 -9999 -9999 -9999 -9999 -9999 -9999 -9999 -9999 -9999 -9999 -9999 -9999 -9999 -9999 -9999 -9999 -9999 -9999 -9999 -9999 -9999 -9999 -9999 -9999 -9999 -9999 -9999 -9999 -9999 -9999 -9999 -9999 -9999 -9999 -9999 -9999 -9999 -9999 -9999 -9999 -9999 -9999 -9999 -9999 -9999 -9999 -9999 -9999 -9999 -9999 -9999 -9999 -9999 -9999 -9999 -9999 -9999 -9999 -9999 -9999 -9999 -9999 -9999 -9999 -9999 -9999 -9999 -9999 -9999 -9999 -9999 -9999 -9999 -9999 -9999 -9999 -9999 -9999 -9999 -9999 -9999 -9999 -9999 -9999 -9999 -9999 -9999 -9999 -9999 -9999 -9999 -9999 -9999 -9999 -9999 -9999 -9999 -9999 -9999 -9999 -9999 -9999 -9999 -9999 -9999 -9999 -9999 -9999 -9999 -9999 -9999 -9999 -9999 -9999 -9999 -9999 -9999 -9999 -9999 -9999 -9999 -9999 -9999 -9999 -9999 -9999 -9999 -9999 -9999 -9999 -9999 -9999 -9999 -9999 -9999 -9999 -9999 -9999 -9999 -9999 -9999 -9999 -9999 -9999 -9999 -9999 -9999 -9999 -9999 -9999 -9999 -9999 -9999 -9999 -9999 -9999 -9999 -9999 -9999 -9999 -9999 -9999 -9999 -9999 -9999 -9999 -9999 -9999 -9999 -9999 -9999 -9999 -9999 -9999 -9999 -9999 -9999 -9999 -9999 -9999 -9999 -9999 -9999 -9999 -9999 -9999 -9999 -9999 -9999 -9999 -9999 -9999 -9999 -9999 -9999 -9999 -9999 -9999 -9999 -9999 -9999 -9999 -9999 -9999 -9999 -9999 -9999 -9999 -9999 -9999 -9999 -9999 -9999 -9999 -9999 -9999 -9999 -9999 -9999 -9999 -9999 -9999 -9999 -9999 -9999 -9999 -9999 -9999 -9999 -9999 -9999 -9999 -9999 -9999 -9999 -9999 -9999 -9999 -9999 -9999 -9999
-9999 -9999 -9999 -9999 -9999 -9999 -9999 -9999 -9999 -9999 -9999 -9999 -9999 -9999 -9999 -9999 -9999 -9999 -9999 -9999 -9999 -9999 -9999 -9999 -9999 -9999 -9999 -9999 -9999 -9999 -9999 -9999 -9999 -9999 -9999 -9999 -9999 -9999 -9999 -9999 -9999 -9999 -9999 -9999 -9999 -9999 -9999 -9999 -9999 -9999 -9999 -9999 -9999 -9999 -9999 -9999 -9999 -9999 -9999 -9999 -9999 -9999 -9999 -9999 -9999 -9999 -9999 -9999 -9999 -9999 -9999 -9999 -9999 -9999 -9999 -9999 -9999 -9999 -9999 -9999 -9999 -9999 -9999 -9999 -9999 -9999 -9999 -9999 -9999 -9999 -9999 -9999 -9999 -9999 -9999 -9999 -9999 -9999 -9999 -9999 -9999 -9999 -9999 -9999 -9999 -9999 -9999 -9999 -9999 -9999 -9999 -9999 -9999 -9999 -9999 -9999 -9999 -9999 -9999 -9999 -9999 -9999 -9999 -9999 -9999 -9999 -9999 -9999 -9999 -9999 -9999 -9999 -9999 -9999 -9999 -9999 -9999 -9999 -9999 -9999 -9999 -9999 -9999 -9999 -9999 -9999 -9999 -9999 -9999 -9999 -9999 -9999 -9999 -9999 -9999 -9999 -9999 -9999 -9999 -9999 -9999 -9999 -9999 -9999 -9999 -9999 -9999 -9999 -9999 -9999 -9999 -9999 -9999 -9999 -9999 -9999 -9999 -9999 -9999 -9999 -9999 -9999 -9999 -9999 -9999 -9999 -9999 -9999 -9999 -9999 -9999 -9999 -9999 -9999 -9999 -9999 -9999 -9999 -9999 -9999 -9999 -9999 -9999 -9999 -9999 -9999 -9999 -9999 -9999 -9999 -9999 -9999 -9999 -9999 -9999 -9999 -9999 -9999 -9999 -9999 -9999 -9999 -9999 -9999 -9999 -9999 -9999 -9999 -9999 -9999 -9999 -9999 -9999 -9999 -9999 -9999 -9999 -9999 -9999 -9999 -9999 -9999 -9999 -9999 -9999 -9999 -9999 -9999 -9999 -9999 -9999 -9999 -9999 -9999 -9999 -9999 -9999 -9999 -9999 -9999 -9999 -9999 -9999 -9999 -9999 -9999 -9999 -9999 -9999 -9999 -9999 -9999 -9999 -9999 -9999 -9999 -9999 -9999 -9999 -9999 -9999 -9999 -9999 -9999 -9999 -9999 -9999 -9999 -9999 -9999 -9999 -9999 -9999 -9999 -9999 -9999 -9999 -9999 -9999 -9999 -9999 -9999 -9999 -9999 -9999 -9999 -9999 -9999 -9999 -9999 -9999 -9999 -9999 -9999 -9999 -9999 -9999 -9999 -9999 -9999 -9999 -9999 -9999 -9999 -9999 -9999 -9999 -9999 -9999 -9999 -9999 -9999 -9999 -9999 -9999 -9999 -9999 -9999 -9999 -9999 -9999 -9999 -9999 -9999 -9999 -9999 -9999 -9999 -9999 -9999 -9999 -9999 -9999 -9999 -9999 -9999 -9999 -9999 -9999 -9999 -9999 -9999 -9999 -9999 -9999 -9999 -9999 -9999 -9999 -9999 -9999 -9999 -9999 -9999 -9999 -9999 -9999 -9999 -9999 -9999 -9999 -9999 -9999 -9999 -9999 -9999 -9999 -9999 -9999 -9999 -9999 -9999 -9999 -9999 -9999 -9999 -9999 -9999 -9999 -9999 -9999 -9999 -9999 -9999 -9999 -9999 -9999 -9999 -9999 -9999 -9999 -9999 -9999 -9999 -9999 -9999 -9999 -9999 -9999 -9999 -9999 -9999 -9999 -9999 -9999 -9999 -9999 -9999 -9999 -9999 -9999 -9999 -9999 -9999 -9999 -9999 -9999 -9999 -9999 -9999 -9999 -9999 -9999 -9999 -9999 -9999 -9999 -9999 -9999 -9999 -9999 -9999 -9999 -9999 -9999 -9999 -9999 -9999 -9999 -9999 -9999 -9999 -9999 -9999 -9999 -9999 -9999 -9999 -9999 -9999 -9999 -9999 -9999 -9999 -9999 -9999 -9999 -9999 -9999 -9999 -9999 -9999 -9999 -9999 -9999 -9999 -9999 -9999 -9999 -9999 -9999 -9999 -9999 -9999 -9999 -9999 -9999 -9999 -9999 -9999 -9999 -9999 -9999 -9999 -9999 -9999 -9999 -9999 -9999 -9999 -9999 -9999 -9999 -9999 -9999 -9999 -9999 -9999 -9999 -9999 -9999 -9999 -9999 -9999 -9999 -9999 -9999 -9999 -9999 -9999 -9999 -9999 -9999 -9999 -9999 -9999 -9999 -9999 -9999 -9999 -9999 -9999 -9999 -9999 -9999 -9999 -9999 -9999 -9999 -9999 -9999 -9999 -9999 -9999 -9999 -9999 -9999 -9999 -9999 -9999 -9999 -9999 -9999 -9999 -9999 -9999 -9999 -9999 -9999 -9999 -9999 -9999 -9999 -9999 -9999 -9999 -9999 -9999 -9999 -9999 -9999 -9999 -9999 -9999 -9999 -9999 -9999 -9999 -9999 -9999 -9999 -9999 -9999 -9999 -9999 -9999 -9999 -9999 -9999 -9999 -9999 -9999 -9999 -9999 -9999 -9999 -9999 -9999 -9999 -9999 -9999 -9999 -9999 -9999 -9999 -9999 -9999 -9999 -9999 -9999 -9999 -9999 -9999 -9999 -9999 -9999 -9999 -9999 -9999 -9999 -9999 -9999 -9999 -9999 -9999 -9999 -9999 -9999 -9999 -9999 -9999 -9999 -9999 -9999 -9999 -9999 -9999 -9999 -9999 -9999 -9999 -9999 -9999 -9999 -9999 -9999 -9999 -9999 -9999 -9999 -9999 -9999 -9999 -9999 -9999 -9999 -9999 -9999 -9999 -9999 -9999 -9999 -9999 -9999 -9999 -9999 -9999 -9999 -9999 -9999 -9999 -9999 -9999 -9999 -9999 -9999 -9999 -9999 -9999 -9999 -9999 -9999 -9999 -9999 -9999 -9999 -9999 -9999 -9999 -9999 -9999 -9999 -9999 -9999 -9999 -9999 -9999 -9999 -9999 -9999 -9999 -9999 -9999 -9999 -9999 -9999 -9999 -9999 -9999 -9999
-9999 -9999 -9999 -9999 -9999 -9999 -9999 -9999 -9999 -9999 -9999 -9999 -9999 -9999 -9999 -9999 -9999 -9999 -9999 -9999 -9999 -9999 -9999 -9999 -9999 -9999 -9999 -9999 -9999 -9999 -9999 -9999 -9999 -9999 -9999 -9999 -9999 -9999 -9999 -9999 -9999 -9999 -9999 -9999 -9999 -9999 -9999 -9999 -9999 -9999 -9999 -9999 -9999 -9999 -9999 -9999 -9999 -9999 -9999 -9999 -9999 -9999 -9999 -9999 -9999 -9999 -9999 -9999 -9999 -9999 -9999 -9999 -9999 -9999 -9999 -9999 -9999 -9999 -9999 -9999 -9999 -9999 -9999 -9999 -9999 -9999 -9999 -9999 -9999 -9999 -9999 -9999 -9999 -9999 -9999 -9999 -9999 -9999 -9999 -9999 -9999 -9999 -9999 -9999 -9999 -9999 -9999 -9999 -9999 -9999 -9999 -9999 -9999 -9999 -9999 -9999 -9999 -9999 -9999 -9999 -9999 -9999 -9999 -9999 -9999 -9999 -9999 -9999 -9999 -9999 -9999 -9999 -9999 -9999 -9999 -9999 -9999 -9999 -9999 -9999 -9999 -9999 -9999 -9999 -9999 -9999 -9999 -9999 -9999 -9999 -9999 -9999 -9999 -9999 -9999 -9999 -9999 -9999 -9999 -9999 -9999 -9999 -9999 -9999 -9999 -9999 -9999 -9999 -9999 -9999 -9999 -9999 -9999 -9999 -9999 -9999 -9999 -9999 -9999 -9999 -9999 -9999 -9999 -9999 -9999 -9999 -9999 -9999 -9999 -9999 -9999 -9999 -9999 -9999 -9999 -9999 -9999 -9999 -9999 -9999 -9999 -9999 -9999 -9999 -9999 -9999 -9999 -9999 -9999 -9999 -9999 -9999 -9999 -9999 -9999 -9999 -9999 -9999 -9999 -9999 -9999 -9999 -9999 -9999 -9999 -9999 -9999 -9999 -9999 -9999 -9999 -9999 -9999 -9999 -9999 -9999 -9999 -9999 -9999 -9999 -9999 -9999 -9999 -9999 -9999 -9999 -9999 -9999 -9999 -9999 -9999 -9999 -9999 -9999 -9999 -9999 -9999 -9999 -9999 -9999 -9999 -9999 -9999 -9999 -9999 -9999 -9999 -9999 -9999 -9999 -9999 -9999 -9999 -9999 -9999 -9999 -9999 -9999 -9999 -9999 -9999 -9999 -9999 -9999 -9999 -9999 -9999 -9999 -9999 -9999 -9999 -9999 -9999 -9999 -9999 -9999 -9999 -9999 -9999 -9999 -9999 -9999 -9999 -9999 -9999 -9999 -9999 -9999 -9999 -9999 -9999 -9999 -9999 -9999 -9999 -9999 -9999 -9999 -9999 -9999 -9999 -9999 -9999 -9999 -9999 -9999 -9999 -9999 -9999 -9999 -9999 -9999 -9999 -9999 -9999 -9999 -9999 -9999 -9999 -9999 -9999 -9999 -9999 -9999 -9999 -9999 -9999 -9999 -9999 -9999 -9999 -9999 -9999 -9999 -9999 -9999 -9999 -9999 -9999 -9999 -9999 -9999 -9999 -9999 -9999 -9999 -9999 -9999 -9999 -9999 -9999 -9999 -9999 -9999 -9999 -9999 -9999 -9999 -9999 -9999 -9999 -9999 -9999 -9999 -9999 -9999 -9999 -9999 -9999 -9999 -9999 -9999 -9999 -9999 -9999 -9999 -9999 -9999 -9999 -9999 -9999 -9999 -9999 -9999 -9999 -9999 -9999 -9999 -9999 -9999 -9999 -9999 -9999 -9999 -9999 -9999 -9999 -9999 -9999 -9999 -9999 -9999 -9999 -9999 -9999 -9999 -9999 -9999 -9999 -9999 -9999 -9999 -9999 -9999 -9999 -9999 -9999 -9999 -9999 -9999 -9999 -9999 -9999 -9999 -9999 -9999 -9999 -9999 -9999 -9999 -9999 -9999 -9999 -9999 -9999 -9999 -9999 -9999 -9999 -9999 -9999 -9999 -9999 -9999 -9999 -9999 -9999 -9999 -9999 -9999 -9999 -9999 -9999 -9999 -9999 -9999 -9999 -9999 -9999 -9999 -9999 -9999 -9999 -9999 -9999 -9999 -9999 -9999 -9999 -9999 -9999 -9999 -9999 -9999 -9999 -9999 -9999 -9999 -9999 -9999 -9999 -9999 -9999 -9999 -9999 -9999 -9999 -9999 -9999 -9999 -9999 -9999 -9999 -9999 -9999 -9999 -9999 -9999 -9999 -9999 -9999 -9999 -9999 -9999 -9999 -9999 -9999 -9999 -9999 -9999 -9999 -9999 -9999 -9999 -9999 -9999 -9999 -9999 -9999 -9999 -9999 -9999 -9999 -9999 -9999 -9999 -9999 -9999 -9999 -9999 -9999 -9999 -9999 -9999 -9999 -9999 -9999 -9999 -9999 -9999 -9999 -9999 -9999 -9999 -9999 -9999 -9999 -9999 -9999 -9999 -9999 -9999 -9999 -9999 -9999 -9999 -9999 -9999 -9999 -9999 -9999 -9999 -9999 -9999 -9999 -9999 -9999 -9999 -9999 -9999 -9999 -9999 -9999 -9999 -9999 -9999 -9999 -9999 -9999 -9999 -9999 -9999 -9999 -9999 -9999 -9999 -9999 -9999 -9999 -9999 -9999 -9999 -9999 -9999 -9999 -9999 -9999 -9999 -9999 -9999 -9999 -9999 -9999 -9999 -9999 -9999 -9999 -9999 -9999 -9999 -9999 -9999 -9999 -9999 -9999 -9999 -9999 -9999 -9999 -9999 -9999 -9999 -9999 -9999 -9999 -9999 -9999 -9999 -9999 -9999 -9999 -9999 -9999 -9999 -9999 -9999 -9999 -9999 -9999 -9999 -9999 -9999 -9999 -9999 -9999 -9999 -9999 -9999 -9999 -9999 -9999 -9999 -9999 -9999 -9999 -9999 -9999 -9999 -9999 -9999 -9999 -9999 -9999 -9999 -9999 -9999 -9999 -9999 -9999 -9999 -9999 -9999 -9999 -9999 -9999 -9999 -9999 -9999 -9999 -9999 -9999 -9999 -9999 -9999 -9999 -9999 -9999 -9999 -9999 -9999 -9999 -9999 -9999 -9999 -9999 -9999 -9999 -9999 -9999 -9999
-9999 -9999 -9999 -9999 -9999 -9999 -9999 -9999 -9999 -9999 -9999 -9999 -9999 -9999 -9999 -9999 -9999 -9999 -9999 -9999 -9999 -9999 -9999 -9999 -9999 -9999 -9999 -9999 -9999 -9999 -9999 -9999 -9999 -9999 -9999 -9999 -9999 -9999 -9999 -9999 -9999 -9999 -9999 -9999 -9999 -9999 -9999 -9999 -9999 -9999 -9999 -9999 -9999 -9999 -9999 -9999 -9999 -9999 -9999 -9999 -9999 -9999 -9999 -9999 -9999 -9999 -9999 -9999 -9999 -9999 -9999 -9999 -9999 -9999 -9999 -9999 -9999 -9999 -9999 -9999 -9999 -9999 -9999 -9999 -9999 -9999 -9999 -9999 -9999 -9999 -9999 -9999 -9999 -9999 -9999 -9999 -9999 -9999 -9999 -9999 -9999 -9999 -9999 -9999 -9999 -9999 -9999 -9999 -9999 -9999 -9999 -9999 -9999 -9999 -9999 -9999 -9999 -9999 -9999 -9999 -9999 -9999 -9999 -9999 -9999 -9999 -9999 -9999 -9999 -9999 -9999 -9999 -9999 -9999 -9999 -9999 -9999 -9999 -9999 -9999 -9999 -9999 -9999 -9999 -9999 -9999 -9999 -9999 -9999 -9999 -9999 -9999 -9999 -9999 -9999 -9999 -9999 -9999 -9999 -9999 -9999 -9999 -9999 -9999 -9999 -9999 -9999 -9999 -9999 -9999 -9999 -9999 -9999 -9999 -9999 -9999 -9999 -9999 -9999 -9999 -9999 -9999 -9999 -9999 -9999 -9999 -9999 -9999 -9999 -9999 -9999 -9999 -9999 -9999 -9999 -9999 -9999 -9999 -9999 -9999 -9999 -9999 -9999 -9999 -9999 -9999 -9999 -9999 -9999 -9999 -9999 -9999 -9999 -9999 -9999 -9999 -9999 -9999 -9999 -9999 -9999 -9999 -9999 -9999 -9999 -9999 -9999 -9999 -9999 -9999 -9999 -9999 -9999 -9999 -9999 -9999 -9999 -9999 -9999 -9999 -9999 -9999 -9999 -9999 -9999 -9999 -9999 -9999 -9999 -9999 -9999 -9999 -9999 -9999 -9999 -9999 -9999 -9999 -9999 -9999 -9999 -9999 -9999 -9999 -9999 -9999 -9999 -9999 -9999 -9999 -9999 -9999 -9999 -9999 -9999 -9999 -9999 -9999 -9999 -9999 -9999 -9999 -9999 -9999 -9999 -9999 -9999 -9999 -9999 -9999 -9999 -9999 -9999 -9999 -9999 -9999 -9999 -9999 -9999 -9999 -9999 -9999 -9999 -9999 -9999 -9999 -9999 -9999 -9999 -9999 -9999 -9999 -9999 -9999 -9999 -9999 -9999 -9999 -9999 -9999 -9999 -9999 -9999 -9999 -9999 -9999 -9999 -9999 -9999 -9999 -9999 -9999 -9999 -9999 -9999 -9999 -9999 -9999 -9999 -9999 -9999 -9999 -9999 -9999 -9999 -9999 -9999 -9999 -9999 -9999 -9999 -9999 -9999 -9999 -9999 -9999 -9999 -9999 -9999 -9999 -9999 -9999 -9999 -9999 -9999 -9999 -9999 -9999 -9999 -9999 -9999 -9999 -9999 -9999 -9999 -9999 -9999 -9999 -9999 -9999 -9999 -9999 -9999 -9999 -9999 -9999 -9999 -9999 -9999 -9999 -9999 -9999 -9999 -9999 -9999 -9999 -9999 -9999 -9999 -9999 -9999 -9999 -9999 -9999 -9999 -9999 -9999 -9999 -9999 -9999 -9999 -9999 -9999 -9999 -9999 -9999 -9999 -9999 -9999 -9999 -9999 -9999 -9999 -9999 -9999 -9999 -9999 -9999 -9999 -9999 -9999 -9999 -9999 -9999 -9999 -9999 -9999 -9999 -9999 -9999 -9999 -9999 -9999 -9999 -9999 -9999 -9999 -9999 -9999 -9999 -9999 -9999 -9999 -9999 -9999 -9999 -9999 -9999 -9999 -9999 -9999 -9999 -9999 -9999 -9999 -9999 -9999 -9999 -9999 -9999 -9999 -9999 -9999 -9999 -9999 -9999 -9999 -9999 -9999 -9999 -9999 -9999 -9999 -9999 -9999 -9999 -9999 -9999 -9999 -9999 -9999 -9999 -9999 -9999 -9999 -9999 -9999 -9999 -9999 -9999 -9999 -9999 -9999 -9999 -9999 -9999 -9999 -9999 -9999 -9999 -9999 -9999 -9999 -9999 -9999 -9999 -9999 -9999 -9999 -9999 -9999 -9999 -9999 -9999 -9999 -9999 -9999 -9999 -9999 -9999 -9999 -9999 -9999 -9999 -9999 -9999 -9999 -9999 -9999 -9999 -9999 -9999 -9999 -9999 -9999 -9999 -9999 -9999 -9999 -9999 -9999 -9999 -9999 -9999 -9999 -9999 -9999 -9999 -9999 -9999 -9999 -9999 -9999 -9999 -9999 -9999 -9999 -9999 -9999 -9999 -9999 -9999 -9999 -9999 -9999 -9999 -9999 -9999 -9999 -9999 -9999 -9999 -9999 -9999 -9999 -9999 -9999 -9999 -9999 -9999 -9999 -9999 -9999 -9999 -9999 -9999 -9999 -9999 -9999 -9999 -9999 -9999 -9999 -9999 -9999 -9999 -9999 -9999 -9999 -9999 -9999 -9999 -9999 -9999 -9999 -9999 -9999 -9999 -9999 -9999 -9999 -9999 -9999 -9999 -9999 -9999 -9999 -9999 -9999 -9999 -9999 -9999 -9999 -9999 -9999 -9999 -9999 -9999 -9999 -9999 -9999 -9999 -9999 -9999 -9999 -9999 -9999 -9999 -9999 -9999 -9999 -9999 -9999 -9999 -9999 -9999 -9999 -9999 -9999 -9999 -9999 -9999 -9999 -9999 -9999 -9999 -9999 -9999 -9999 -9999 -9999 -9999 -9999 -9999 -9999 -9999 -9999 -9999 -9999 -9999 -9999 -9999 -9999 -9999 -9999 -9999 -9999 -9999 -9999 -9999 -9999 -9999 -9999 -9999 -9999 -9999 -9999 -9999 -9999 -9999 -9999 -9999 -9999 -9999 -9999 -9999 -9999 -9999 -9999 -9999 -9999 -9999 -9999 -9999 -9999 -9999 -9999 -9999 -9999 -9999
-9999 -9999 -9999 -9999 -9999 -9999 -9999 -9999 -9999 -9999 -9999 -9999 -9999 -9999 -9999 -9999 -9999 -9999 -9999 -9999 -9999 -9999 -9999 -9999 -9999 -9999 -9999 -9999 -9999 -9999 -9999 -9999 -9999 -9999 -9999 -9999 -9999 -9999 -9999 -9999 -9999 -9999 -9999 -9999 -9999 -9999 -9999 -9999 -9999 -9999 -9999 -9999 -9999 -9999 -9999 -9999 -9999 -9999 -9999 -9999 -9999 -9999 -9999 -9999 -9999 -9999 -9999 -9999 -9999 -9999 -9999 -9999 -9999 -9999 -9999 -9999 -9999 -9999 -9999 -9999 -9999 -9999 -9999 -9999 -9999 -9999 -9999 -9999 -9999 -9999 -9999 -9999 -9999 -9999 -9999 -9999 -9999 -9999 -9999 -9999 -9999 -9999 -9999 -9999 -9999 -9999 -9999 -9999 -9999 -9999 -9999 -9999 -9999 -9999 -9999 -9999 -9999 -9999 -9999 -9999 -9999 -9999 -9999 -9999 -9999 -9999 -9999 -9999 -9999 -9999 -9999 -9999 -9999 -9999 -9999 -9999 -9999 -9999 -9999 -9999 -9999 -9999 -9999 -9999 -9999 -9999 -9999 -9999 -9999 -9999 -9999 -9999 -9999 -9999 -9999 -9999 -9999 -9999 -9999 -9999 -9999 -9999 -9999 -9999 -9999 -9999 -9999 -9999 -9999 -9999 -9999 -9999 -9999 -9999 -9999 -9999 -9999 -9999 -9999 -9999 -9999 -9999 -9999 -9999 -9999 -9999 -9999 -9999 -9999 -9999 -9999 -9999 -9999 -9999 -9999 -9999 -9999 -9999 -9999 -9999 -9999 -9999 -9999 -9999 -9999 -9999 -9999 -9999 -9999 -9999 -9999 -9999 -9999 -9999 -9999 -9999 -9999 -9999 -9999 -9999 -9999 -9999 -9999 -9999 -9999 -9999 -9999 -9999 -9999 -9999 -9999 -9999 -9999 -9999 -9999 -9999 -9999 -9999 -9999 -9999 -9999 -9999 -9999 -9999 -9999 -9999 -9999 -9999 -9999 -9999 -9999 -9999 -9999 -9999 -9999 -9999 -9999 -9999 -9999 -9999 -9999 -9999 -9999 -9999 -9999 -9999 -9999 -9999 -9999 -9999 -9999 -9999 -9999 -9999 -9999 -9999 -9999 -9999 -9999 -9999 -9999 -9999 -9999 -9999 -9999 -9999 -9999 -9999 -9999 -9999 -9999 -9999 -9999 -9999 -9999 -9999 -9999 -9999 -9999 -9999 -9999 -9999 -9999 -9999 -9999 -9999 -9999 -9999 -9999 -9999 -9999 -9999 -9999 -9999 -9999 -9999 -9999 -9999 -9999 -9999 -9999 -9999 -9999 -9999 -9999 -9999 -9999 -9999 -9999 -9999 -9999 -9999 -9999 -9999 -9999 -9999 -9999 -9999 -9999 -9999 -9999 -9999 -9999 -9999 -9999 -9999 -9999 -9999 -9999 -9999 -9999 -9999 -9999 -9999 -9999 -9999 -9999 -9999 -9999 -9999 -9999 -9999 -9999 -9999 -9999 -9999 -9999 -9999 -9999 -9999 -9999 -9999 -9999 -9999 -9999 -9999 -9999 -9999 -9999 -9999 -9999 -9999 -9999 -9999 -9999 -9999 -9999 -9999 -9999 -9999 -9999 -9999 -9999 -9999 -9999 -9999 -9999 -9999 -9999 -9999 -9999 -9999 -9999 -9999 -9999 -9999 -9999 -9999 -9999 -9999 -9999 -9999 -9999 -9999 -9999 -9999 -9999 -9999 -9999 -9999 -9999 -9999 -9999 -9999 -9999 -9999 -9999 -9999 -9999 -9999 -9999 -9999 -9999 -9999 -9999 -9999 -9999 -9999 -9999 -9999 -9999 -9999 -9999 -9999 -9999 -9999 -9999 -9999 -9999 -9999 -9999 -9999 -9999 -9999 -9999 -9999 -9999 -9999 -9999 -9999 -9999 -9999 -9999 -9999 -9999 -9999 -9999 -9999 -9999 -9999 -9999 -9999 -9999 -9999 -9999 -9999 -9999 -9999 -9999 -9999 -9999 -9999 -9999 -9999 -9999 -9999 -9999 -9999 -9999 -9999 -9999 -9999 -9999 -9999 -9999 -9999 -9999 -9999 -9999 -9999 -9999 -9999 -9999 -9999 -9999 -9999 -9999 -9999 -9999 -9999 -9999 -9999 -9999 -9999 -9999 -9999 -9999 -9999 -9999 -9999 -9999 -9999 -9999 -9999 -9999 -9999 -9999 -9999 -9999 -9999 -9999 -9999 -9999 -9999 -9999 -9999 -9999 -9999 -9999 -9999 -9999 -9999 -9999 -9999 -9999 -9999 -9999 -9999 -9999 -9999 -9999 -9999 -9999 -9999 -9999 -9999 -9999 -9999 -9999 -9999 -9999 -9999 -9999 -9999 -9999 -9999 -9999 -9999 -9999 -9999 -9999 -9999 -9999 -9999 -9999 -9999 -9999 -9999 -9999 -9999 -9999 -9999 -9999 -9999 -9999 -9999 -9999 -9999 -9999 -9999 -9999 -9999 -9999 -9999 -9999 -9999 -9999 -9999 -9999 -9999 -9999 -9999 -9999 -9999 -9999 -9999 -9999 -9999 -9999 -9999 -9999 -9999 -9999 -9999 -9999 -9999 -9999 -9999 -9999 -9999 -9999 -9999 -9999 -9999 -9999 -9999 -9999 -9999 -9999 -9999 -9999 -9999 -9999 -9999 -9999 -9999 -9999 -9999 -9999 -9999 -9999 -9999 -9999 -9999 -9999 -9999 -9999 -9999 -9999 -9999 -9999 -9999 -9999 -9999 -9999 -9999 -9999 -9999 -9999 -9999 -9999 -9999 -9999 -9999 -9999 -9999 -9999 -9999 -9999 -9999 -9999 -9999 -9999 -9999 -9999 -9999 -9999 -9999 -9999 -9999 -9999 -9999 -9999 -9999 -9999 -9999 -9999 -9999 -9999 -9999 -9999 -9999 -9999 -9999 -9999 -9999 -9999 -9999 -9999 -9999 -9999 -9999 -9999 -9999 -9999 -9999 -9999 -9999 -9999 -9999 -9999 -9999 -9999 -9999 -9999 -9999 -9999 -9999 -9999 -9999
-9999 -9999 -9999 -9999 -9999 -9999 -9999 -9999 -9999 -9999 -9999 -9999 -9999 -9999 -9999 -9999 -9999 -9999 -9999 -9999 -9999 -9999 -9999 -9999 -9999 -9999 -9999 -9999 -9999 -9999 -9999 -9999 -9999 -9999 -9999 -9999 -9999 -9999 -9999 -9999 -9999 -9999 -9999 -9999 -9999 -9999 -9999 -9999 -9999 -9999 -9999 -9999 -9999 -9999 -9999 -9999 -9999 -9999 -9999 -9999 -9999 -9999 -9999 -9999 -9999 -9999 -9999 -9999 -9999 -9999 -9999 -9999 -9999 -9999 -9999 -9999 -9999 -9999 -9999 -9999 -9999 -9999 -9999 -9999 -9999 -9999 -9999 -9999 -9999 -9999 -9999 -9999 -9999 -9999 -9999 -9999 -9999 -9999 -9999 -9999 -9999 -9999 -9999 -9999 -9999 -9999 -9999 -9999 -9999 -9999 -9999 -9999 -9999 -9999 -9999 -9999 -9999 -9999 -9999 -9999 -9999 -9999 -9999 -9999 -9999 -9999 -9999 -9999 -9999 -9999 -9999 -9999 -9999 -9999 -9999 -9999 -9999 -9999 -9999 -9999 -9999 -9999 -9999 -9999 -9999 -9999 -9999 -9999 -9999 -9999 -9999 -9999 -9999 -9999 -9999 -9999 -9999 -9999 -9999 -9999 -9999 -9999 -9999 -9999 -9999 -9999 -9999 -9999 -9999 -9999 -9999 -9999 -9999 -9999 -9999 -9999 -9999 -9999 -9999 -9999 -9999 -9999 -9999 -9999 -9999 -9999 -9999 -9999 -9999 -9999 -9999 -9999 -9999 -9999 -9999 -9999 -9999 -9999 -9999 -9999 -9999 -9999 -9999 -9999 -9999 -9999 -9999 -9999 -9999 -9999 -9999 -9999 -9999 -9999 -9999 -9999 -9999 -9999 -9999 -9999 -9999 -9999 -9999 -9999 -9999 -9999 -9999 -9999 -9999 -9999 -9999 -9999 -9999 -9999 -9999 -9999 -9999 -9999 -9999 -9999 -9999 -9999 -9999 -9999 -9999 -9999 -9999 -9999 -9999 -9999 -9999 -9999 -9999 -9999 -9999 -9999 -9999 -9999 -9999 -9999 -9999 -9999 -9999 -9999 -9999 -9999 -9999 -9999 -9999 -9999 -9999 -9999 -9999 -9999 -9999 -9999 -9999 -9999 -9999 -9999 -9999 -9999 -9999 -9999 -9999 -9999 -9999 -9999 -9999 -9999 -9999 -9999 -9999 -9999 -9999 -9999 -9999 -9999 -9999 -9999 -9999 -9999 -9999 -9999 -9999 -9999 -9999 -9999 -9999 -9999 -9999 -9999 -9999 -9999 -9999 -9999 -9999 -9999 -9999 -9999 -9999 -9999 -9999 -9999 -9999 -9999 -9999 -9999 -9999 -9999 -9999 -9999 -9999 -9999 -9999 -9999 -9999 -9999 -9999 -9999 -9999 -9999 -9999 -9999 -9999 -9999 -9999 -9999 -9999 -9999 -9999 -9999 -9999 -9999 -9999 -9999 -9999 -9999 -9999 -9999 -9999 -9999 -9999 -9999 -9999 -9999 -9999 -9999 -9999 -9999 -9999 -9999 -9999 -9999 -9999 -9999 -9999 -9999 -9999 -9999 -9999 -9999 -9999 -9999 -9999 -9999 -9999 -9999 -9999 -9999 -9999 -9999 -9999 -9999 -9999 -9999 -9999 -9999 -9999 -9999 -9999 -9999 -9999 -9999 -9999 -9999 -9999 -9999 -9999 -9999 -9999 -9999 -9999 -9999 -9999 -9999 -9999 -9999 -9999 -9999 -9999 -9999 -9999 -9999 -9999 -9999 -9999 -9999 -9999 -9999 -9999 -9999 -9999 -9999 -9999 -9999 -9999 -9999 -9999 -9999 -9999 -9999 -9999 -9999 -9999 -9999 -9999 -9999 -9999 -9999 -9999 -9999 -9999 -9999 -9999 -9999 -9999 -9999 -9999 -9999 -9999 -9999 -9999 -9999 -9999 -9999 -9999 -9999 -9999 -9999 -9999 -9999 -9999 -9999 -9999 -9999 -9999 -9999 -9999 -9999 -9999 -9999 -9999 -9999 -9999 -9999 -9999 -9999 -9999 -9999 -9999 -9999 -9999 -9999 -9999 -9999 -9999 -9999 -9999 -9999 -9999 -9999 -9999 -9999 -9999 -9999 -9999 -9999 -9999 -9999 -9999 -9999 -9999 -9999 -9999 -9999 -9999 -9999 -9999 -9999 -9999 -9999 -9999 -9999 -9999 -9999 -9999 -9999 -9999 -9999 -9999 -9999 -9999 -9999 -9999 -9999 -9999 -9999 -9999 -9999 -9999 -9999 -9999 -9999 -9999 -9999 -9999 -9999 -9999 -9999 -9999 -9999 -9999 -9999 -9999 -9999 -9999 -9999 -9999 -9999 -9999 -9999 -9999 -9999 -9999 -9999 -9999 -9999 -9999 -9999 -9999 -9999 -9999 -9999 -9999 -9999 -9999 -9999 -9999 -9999 -9999 -9999 -9999 -9999 -9999 -9999 -9999 -9999 -9999 -9999 -9999 -9999 -9999 -9999 -9999 -9999 -9999 -9999 -9999 -9999 -9999 -9999 -9999 -9999 -9999 -9999 -9999 -9999 -9999 -9999 -9999 -9999 -9999 -9999 -9999 -9999 -9999 -9999 -9999 -9999 -9999 -9999 -9999 -9999 -9999 -9999 -9999 -9999 -9999 -9999 -9999 -9999 -9999 -9999 -9999 -9999 -9999 -9999 -9999 -9999 -9999 -9999 -9999 -9999 -9999 -9999 -9999 -9999 -9999 -9999 -9999 -9999 -9999 -9999 -9999 -9999 -9999 -9999 -9999 -9999 -9999 -9999 -9999 -9999 -9999 -9999 -9999 -9999 -9999 -9999 -9999 -9999 -9999 -9999 -9999 -9999 -9999 -9999 -9999 -9999 -9999 -9999 -9999 -9999 -9999 -9999 -9999 -9999 -9999 -9999 -9999 -9999 -9999 -9999 -9999 -9999 -9999 -9999 -9999 -9999 -9999 -9999 -9999 -9999 -9999 -9999 -9999 -9999 -9999 -9999 -9999 -9999 -9999 -9999 -9999 -9999 -9999 -9999 -9999 -9999
-9999 -9999 -9999 -9999 -9999 -9999 -9999 -9999 -9999 -9999 -9999 -9999 -9999 -9999 -9999 -9999 -9999 -9999 -9999 -9999 -9999 -9999 -9999 -9999 -9999 -9999 -9999 -9999 -9999 -9999 -9999 -9999 -9999 -9999 -9999 -9999 -9999 -9999 -9999 -9999 -9999 -9999 -9999 -9999 -9999 -9999 -9999 -9999 -9999 -9999 -9999 -9999 -9999 -9999 -9999 -9999 -9999 -9999 -9999 -9999 -9999 -9999 -9999 -9999 -9999 -9999 -9999 -9999 -9999 -9999 -9999 -9999 -9999 -9999 -9999 -9999 -9999 -9999 -9999 -9999 -9999 -9999 -9999 -9999 -9999 -9999 -9999 -9999 -9999 -9999 -9999 -9999 -9999 -9999 -9999 -9999 -9999 -9999 -9999 -9999 -9999 -9999 -9999 -9999 -9999 -9999 -9999 -9999 -9999 -9999 -9999 -9999 -9999 -9999 -9999 -9999 -9999 -9999 -9999 -9999 -9999 -9999 -9999 -9999 -9999 -9999 -9999 -9999 -9999 -9999 -9999 -9999 -9999 -9999 -9999 -9999 -9999 -9999 -9999 -9999 -9999 -9999 -9999 -9999 -9999 -9999 -9999 -9999 -9999 -9999 -9999 -9999 -9999 -9999 -9999 -9999 -9999 -9999 -9999 -9999 -9999 -9999 -9999 -9999 -9999 -9999 -9999 -9999 -9999 -9999 -9999 -9999 -9999 -9999 -9999 -9999 -9999 -9999 -9999 -9999 -9999 -9999 -9999 -9999 -9999 -9999 -9999 -9999 -9999 -9999 -9999 -9999 -9999 -9999 -9999 -9999 -9999 -9999 -9999 -9999 -9999 -9999 -9999 -9999 -9999 -9999 -9999 -9999 -9999 -9999 -9999 -9999 -9999 -9999 -9999 -9999 -9999 -9999 -9999 -9999 -9999 -9999 -9999 -9999 -9999 -9999 -9999 -9999 -9999 -9999 -9999 -9999 -9999 -9999 -9999 -9999 -9999 -9999 -9999 -9999 -9999 -9999 -9999 -9999 -9999 -9999 -9999 -9999 -9999 -9999 -9999 -9999 -9999 -9999 -9999 -9999 -9999 -9999 -9999 -9999 -9999 -9999 -9999 -9999 -9999 -9999 -9999 -9999 -9999 -9999 -9999 -9999 -9999 -9999 -9999 -9999 -9999 -9999 -9999 -9999 -9999 -9999 -9999 -9999 -9999 -9999 -9999 -9999 -9999 -9999 -9999 -9999 -9999 -9999 -9999 -9999 -9999 -9999 -9999 -9999 -9999 -9999 -9999 -9999 -9999 -9999 -9999 -9999 -9999 -9999 -9999 -9999 -9999 -9999 -9999 -9999 -9999 -9999 -9999 -9999 -9999 -9999 -9999 -9999 -9999 -9999 -9999 -9999 -9999 -9999 -9999 -9999 -9999 -9999 -9999 -9999 -9999 -9999 -9999 -9999 -9999 -9999 -9999 -9999 -9999 -9999 -9999 -9999 -9999 -9999 -9999 -9999 -9999 -9999 -9999 -9999 -9999 -9999 -9999 -9999 -9999 -9999 -9999 -9999 -9999 -9999 -9999 -9999 -9999 -9999 -9999 -9999 -9999 -9999 -9999 -9999 -9999 -9999 -9999 -9999 -9999 -9999 -9999 -9999 -9999 -9999 -9999 -9999 -9999 -9999 -9999 -9999 -9999 -9999 -9999 -9999 -9999 -9999 -9999 -9999 -9999 -9999 -9999 -9999 -9999 -9999 -9999 -9999 -9999 -9999 -9999 -9999 -9999 -9999 -9999 -9999 -9999 -9999 -9999 -9999 -9999 -9999 -9999 -9999 -9999 -9999 -9999 -9999 -9999 -9999 -9999 -9999 -9999 -9999 -9999 -9999 -9999 -9999 -9999 -9999 -9999 -9999 -9999 -9999 -9999 -9999 -9999 -9999 -9999 -9999 -9999 -9999 -9999 -9999 -9999 -9999 -9999 -9999 -9999 -9999 -9999 -9999 -9999 -9999 -9999 -9999 -9999 -9999 -9999 -9999 -9999 -9999 -9999 -9999 -9999 -9999 -9999 -9999 -9999 -9999 -9999 -9999 -9999 -9999 -9999 -9999 -9999 -9999 -9999 -9999 -9999 -9999 -9999 -9999 -9999 -9999 -9999 -9999 -9999 -9999 -9999 -9999 -9999 -9999 -9999 -9999 -9999 -9999 -9999 -9999 -9999 -9999 -9999 -9999 -9999 -9999 -9999 -9999 -9999 -9999 -9999 -9999 -9999 -9999 -9999 -9999 -9999 -9999 -9999 -9999 -9999 -9999 -9999 -9999 -9999 -9999 -9999 -9999 -9999 -9999 -9999 -9999 -9999 -9999 -9999 -9999 -9999 -9999 -9999 -9999 -9999 -9999 -9999 -9999 -9999 -9999 -9999 -9999 -9999 -9999 -9999 -9999 -9999 -9999 -9999 -9999 -9999 -9999 -9999 -9999 -9999 -9999 -9999 -9999 -9999 -9999 -9999 -9999 -9999 -9999 -9999 -9999 -9999 -9999 -9999 -9999 -9999 -9999 -9999 -9999 -9999 -9999 -9999 -9999 -9999 -9999 -9999 -9999 -9999 -9999 -9999 -9999 -9999 -9999 -9999 -9999 -9999 -9999 -9999 -9999 -9999 -9999 -9999 -9999 -9999 -9999 -9999 -9999 -9999 -9999 -9999 -9999 -9999 -9999 -9999 -9999 -9999 -9999 -9999 -9999 -9999 -9999 -9999 -9999 -9999 -9999 -9999 -9999 -9999 -9999 -9999 -9999 -9999 -9999 -9999 -9999 -9999 -9999 -9999 -9999 -9999 -9999 -9999 -9999 -9999 -9999 -9999 -9999 -9999 -9999 -9999 -9999 -9999 -9999 -9999 -9999 -9999 -9999 -9999 -9999 -9999 -9999 -9999 -9999 -9999 -9999 -9999 -9999 -9999 -9999 -9999 -9999 -9999 -9999 -9999 -9999 -9999 -9999 -9999 -9999 -9999 -9999 -9999 -9999 -9999 -9999 -9999 -9999 -9999 -9999 -9999 -9999 -9999 -9999 -9999 -9999 -9999 -9999 -9999 -9999 -9999 -9999 -9999 -9999 -9999 -9999 -9999 -9999 -9999 -9999
-9999 -9999 -9999 -9999 -9999 -9999 -9999 -9999 -9999 -9999 -9999 -9999 -9999 -9999 -9999 -9999 -9999 -9999 -9999 -9999 -9999 -9999 -9999 -9999 -9999 -9999 -9999 -9999 -9999 -9999 -9999 -9999 -9999 -9999 -9999 -9999 -9999 -9999 -9999 -9999 -9999 -9999 -9999 -9999 -9999 -9999 -9999 -9999 -9999 -9999 -9999 -9999 -9999 -9999 -9999 -9999 -9999 -9999 -9999 -9999 -9999 -9999 -9999 -9999 -9999 -9999 -9999 -9999 -9999 -9999 -9999 -9999 -9999 -9999 -9999 -9999 -9999 -9999 -9999 -9999 -9999 -9999 -9999 -9999 -9999 -9999 -9999 -9999 -9999 -9999 -9999 -9999 -9999 -9999 -9999 -9999 -9999 -9999 -9999 -9999 -9999 -9999 -9999 -9999 -9999 -9999 -9999 -9999 -9999 -9999 -9999 -9999 -9999 -9999 -9999 -9999 -9999 -9999 -9999 -9999 -9999 -9999 -9999 -9999 -9999 -9999 -9999 -9999 -9999 -9999 -9999 -9999 -9999 -9999 -9999 -9999 -9999 -9999 -9999 -9999 -9999 -9999 -9999 -9999 -9999 -9999 -9999 -9999 -9999 -9999 -9999 -9999 -9999 -9999 -9999 -9999 -9999 -9999 -9999 -9999 -9999 -9999 -9999 -9999 -9999 -9999 -9999 -9999 -9999 -9999 -9999 -9999 -9999 -9999 -9999 -9999 -9999 -9999 -9999 -9999 -9999 -9999 -9999 -9999 -9999 -9999 -9999 -9999 -9999 -9999 -9999 -9999 -9999 -9999 -9999 -9999 -9999 -9999 -9999 -9999 -9999 -9999 -9999 -9999 -9999 -9999 -9999 -9999 -9999 -9999 -9999 -9999 -9999 -9999 -9999 -9999 -9999 -9999 -9999 -9999 -9999 -9999 -9999 -9999 -9999 -9999 -9999 -9999 -9999 -9999 -9999 -9999 -9999 -9999 -9999 -9999 -9999 -9999 -9999 -9999 -9999 -9999 -9999 -9999 -9999 -9999 -9999 -9999 -9999 -9999 -9999 -9999 -9999 -9999 -9999 -9999 -9999 -9999 -9999 -9999 -9999 -9999 -9999 -9999 -9999 -9999 -9999 -9999 -9999 -9999 -9999 -9999 -9999 -9999 -9999 -9999 -9999 -9999 -9999 -9999 -9999 -9999 -9999 -9999 1.26583911895752 1.44969944000244 1.31327739715576 1.74249069213867 1.74564056396484 1.25656951904297 1.21139911651611 1.31177375793457 1.29251415252686 1.27533462524414 1.70430770874023 1.60980880737305 1.60734649658203 1.66948081970215 1.32788188934326 0.815580081939697 0.644599742889404 0.400262804031372 0.243002729415894 -9999 -9999 -9999 -9999 -9999 -9999 -9999 -9999 -9999 -9999 -9999 -9999 -9999 -9999 -9999 -9999 -9999 -9999 -9999 -9999 -9999 -9999 -9999 -9999 -9999 -9999 -9999 -9999 -9999 -9999 -9999 -9999 -9999 -9999 -9999 -9999 -9999 -9999 -9999 -9999 -9999 -9999 -9999 -9999 -9999 -9999 -9999 -9999 -9999 -9999 -9999 -9999 -9999 -9999 -9999 -9999 -9999 -9999 -9999 -9999 -9999 -9999 -9999 -9999 -9999 -9999 -9999 -9999 -9999 -9999 -9999 -9999 -9999 -9999 -9999 -9999 -9999 -9999 -9999 -9999 -9999 -9999 -9999 -9999 -9999 -9999 -9999 -9999 -9999 -9999 -9999 -9999 -9999 -9999 -9999 -9999 -9999 -9999 -9999 -9999 -9999 -9999 -9999 -9999 -9999 -9999 -9999 -9999 -9999 -9999 -9999 -9999 -9999 -9999 -9999 -9999 -9999 -9999 -9999 -9999 -9999 -9999 -9999 -9999 -9999 -9999 -9999 -9999 -9999 -9999 -9999 -9999 -9999 -9999 -9999 -9999 -9999 -9999 -9999 -9999 -9999 -9999 -9999 -9999 -9999 -9999 -9999 -9999 -9999 -9999 -9999 -9999 -9999 -9999 -9999 -9999 -9999 -9999 -9999 -9999 -9999 -9999 -9999 -9999 -9999 -9999 -9999 -9999 -9999 -9999 -9999 -9999 -9999 -9999 -9999 -9999 -9999 -9999 -9999 -9999 -9999 -9999 -9999 -9999 -9999 -9999 -9999 -9999 -9999 -9999 -9999 -9999 -9999 -9999 -9999 -9999 -9999 -9999 -9999 -9999 -9999 -9999 -9999 -9999 -9999 -9999 -9999 -9999 -9999 -9999 -9999 -9999 -9999 -9999 -9999 -9999 -9999 -9999 -9999 -9999 -9999 -9999 -9999 -9999 -9999 -9999 -9999 -9999 -9999 -9999 -9999 -9999 -9999 -9999 -9999 -9999 -9999 -9999 -9999 -9999 -9999 -9999 -9999 -9999 -9999 -9999 -9999 -9999 -9999 -9999 -9999 -9999 -9999 -9999 -9999 -9999 -9999 -9999 -9999 -9999 -9999 -9999 -9999 -9999 -9999 -9999 -9999 -9999 -9999 -9999 -9999 -9999 -9999 -9999 -9999 -9999 -9999 -9999 -9999 -9999 -9999 -9999 -9999 -9999 -9999 -9999 -9999 -9999 -9999 -9999 -9999 -9999 -9999 -9999 -9999 -9999 -9999 -9999 -9999 -9999 -9999 -9999 -9999 -9999 -9999 -9999 -9999 -9999 -9999 -9999 -9999 -9999 -9999 -9999 -9999 -9999 -9999 -9999 -9999 -9999 -9999 -9999 -9999 -9999 -9999 -9999 -9999 -9999 -9999 -9999 -9999 -9999 -9999 -9999 -9999 -9999 -9999 -9999 -9999 -9999 -9999 -9999 -9999 -9999 -9999 -9999 -9999 -9999 -9999 -9999 -9999 -9999 -9999 -9999 -9999 -9999 -9999 -9999 -9999 -9999 -9999 -9999 -9999 -9999 -9999 -9999 -9999 -9999 -9999 -9999 -9999 -9999 -9999 -9999 -9999 -9999 -9999 -9999 -9999 -9999 -9999 -9999 -9999 -9999 -9999 -9999 -9999 -9999 -9999 -9999 -9999 -9999 -9999 -9999 -9999 -9999 -9999 -9999 -9999 -9999 -9999 -9999 -9999 -9999 -9999 -9999 -9999 -9999 -9999 -9999 -9999 -9999 -9999 -9999 -9999 -9999 -9999
-9999 -9999 -9999 -9999 -9999 -9999 -9999 -9999 -9999 -9999 -9999 -9999 -9999 -9999 -9999 -9999 -9999 -9999 -9999 -9999 -9999 -9999 -9999 -9999 -9999 -9999 -9999 -9999 -9999 -9999 -9999 -9999 -9999 -9999 -9999 -9999 -9999 -9999 -9999 -9999 -9999 -9999 -9999 -9999 -9999 -9999 -9999 -9999 -9999 -9999 -9999 -9999 -9999 -9999 -9999 -9999 -9999 -9999 -9999 -9999 -9999 -9999 -9999 -9999 -9999 -9999 -9999 -9999 -9999 -9999 -9999 -9999 -9999 -9999 -9999 -9999 -9999 -9999 -9999 -9999 -9999 -9999 -9999 -9999 -9999 -9999 -9999 -9999 -9999 -9999 -9999 -9999 -9999 -9999 -9999 -9999 -9999 -9999 -9999 -9999 -9999 -9999 -9999 -9999 -9999 -9999 -9999 -9999 -9999 -9999 -9999 -9999 -9999 -9999 -9999 -9999 -9999 -9999 -9999 -9999 -9999 -9999 -9999 -9999 -9999 -9999 -9999 -9999 -9999 -9999 -9999 -9999 -9999 -9999 -9999 -9999 -9999 -9999 -9999 -9999 -9999 -9999 -9999 -9999 -9999 -9999 -9999 -9999 -9999 -9999 -9999 -9999 -9999 -9999 -9999 -9999 -9999 -9999 -9999 -9999 -9999 -9999 -9999 -9999 -9999 -9999 -9999 -9999 -9999 -9999 -9999 -9999 -9999 -9999 -9999 -9999 -9999 -9999 -9999 -9999 -9999 -9999 -9999 -9999 -9999 -9999 -9999 -9999 -9999 -9999 -9999 -9999 -9999 -9999 -9999 -9999 -9999 -9999 -9999 -9999 -9999 -9999 -9999 -9999 -9999 -9999 -9999 -9999 -9999 -9999 -9999 -9999 -9999 -9999 -9999 1.46116046905518 1.53651111602783 -9999 1.55948318481445 1.48339393615723 1.43226196289063 -9999 -9999 -9999 -9999 -9999 -9999 -9999 -9999 -9999 -9999 -9999 -9999 -9999 -9999 -9999 -9999 -9999 -9999 -9999 -9999 -9999 -9999 -9999 -9999 -9999 -9999 -9999 -9999 -9999 -9999 -9999 -9999 -9999 -9999 -9999 -9999 -9999 -9999 -9999 -9999 -9999 -9999 -9999 -9999 -9999 0.980063323974609 0.936450691223145 1.06043312072754 1.09728137969971 1.15250679016113 1.15304271697998 1.58656219482422 1.67012180328369 1.69101356506348 1.21953552246094 1.33937038421631 1.42160820007324 1.40268951416016 1.36079246520996 1.40342697143555 1.01018852233887 1.01416797637939 1.01690872192383 1.0158748626709 1.01451725006104 1.01554058074951 1.01761425018311 1.016865234375 1.01748847961426 1.01125900268555 1.00737064361572 1.0134534072876 0.977324409484863 1.00581996917725 1.01514358520508 1.75496406555176 1.75332836151123 1.74642150878906 1.73754844665527 1.73087631225586 1.64621349334717 1.43109752655029 1.29703628540039 1.66547595977783 1.65862403869629 0.339263105392456 0.319370441436768 0.314725971221924 0.325011777877808 0.310698308944702 -9999 -9999 -9999 -9999 -9999 -9999 -9999 -9999 -9999 -9999 -9999 -9999 -9999 -9999 -9999 -9999 -9999 -9999 -9999 -9999 -9999 -9999 -9999 -9999 -9999 -9999 -9999 -9999 -9999 -9999 -9999 -9999 -9999 -9999 -9999 -9999 -9999 -9999 -9999 -9999 -9999 -9999 -9999 -9999 -9999 -9999 -9999 -9999 -9999 -9999 -9999 -9999 -9999 -9999 -9999 -9999 -9999 -9999 -9999 -9999 -9999 -9999 -9999 -9999 -9999 -9999 -9999 -9999 -9999 -9999 -9999 -9999 -9999 -9999 -9999 -9999 -9999 -9999 -9999 -9999 -9999 -9999 -9999 -9999 -9999 -9999 -9999 -9999 -9999 -9999 -9999 -9999 -9999 -9999 -9999 -9999 -9999 -9999 -9999 -9999 -9999 -9999 -9999 -9999 -9999 -9999 -9999 -9999 -9999 -9999 -9999 -9999 -9999 -9999 -9999 -9999 -9999 -9999 -9999 -9999 -9999 -9999 -9999 -9999 -9999 -9999 -9999 -9999 -9999 -9999 -9999 -9999 -9999 -9999 -9999 -9999 -9999 -9999 -9999 -9999 -9999 -9999 -9999 -9999 -9999 -9999 -9999 -9999 -9999 -9999 -9999 -9999 -9999 -9999 -9999 -9999 -9999 -9999 -9999 -9999 -9999 -9999 -9999 -9999 -9999 -9999 -9999 -9999 -9999 -9999 -9999 -9999 -9999 -9999 -9999 -9999 -9999 -9999 -9999 -9999 -9999 -9999 -9999 -9999 -9999 -9999 -9999 -9999 -9999 -9999 -9999 -9999 -9999 -9999 -9999 -9999 -9999 -9999 -9999 -9999 -9999 -9999 -9999 -9999 -9999 -9999 -9999 -9999 -9999 -9999 -9999 -9999 -9999 -9999 -9999 -9999 -9999 -9999 -9999 -9999 -9999 -9999 -9999 -9999 -9999 -9999 -9999 -9999 -9999 -9999 -9999 -9999 -9999 -9999 -9999 -9999 -9999 -9999 -9999 -9999 -9999 -9999 -9999 -9999 -9999 -9999 -9999 -9999 -9999 -9999 -9999 -9999 -9999 -9999 -9999 -9999 -9999 -9999 -9999 -9999 -9999 -9999 -9999 -9999 -9999 -9999 -9999 -9999 -9999 -9999 -9999 -9999 -9999 -9999 -9999 -9999 -9999 -9999 -9999 -9999 -9999 -9999 -9999 -9999 -9999 -9999 -9999 -9999 -9999 -9999 -9999 -9999 -9999 -9999 -9999 -9999 -9999 -9999 -9999 -9999 -9999 -9999 -9999 -9999 -9999 -9999 -9999 -9999 -9999 -9999 -9999 -9999 -9999 -9999 -9999 -9999 -9999 -9999 -9999 -9999 -9999 -9999 -9999 -9999 -9999 -9999 -9999 -9999 -9999 -9999 -9999 -9999 -9999 -9999 -9999 -9999 -9999 -9999 -9999 -9999 -9999 -9999 -9999 -9999 -9999 -9999 -9999 -9999 -9999 -9999 -9999 -9999 -9999 -9999 -9999 -9999 -9999 -9999 -9999 -9999 -9999 -9999 -9999 -9999 -9999 -9999 -9999 -9999 -9999 -9999 -9999 -9999 -9999 -9999 -9999 -9999 -9999 -9999 -9999 -9999 -9999 -9999 -9999 -9999 -9999 -9999 -9999 -9999 -9999 -9999 -9999 -9999 -9999 -9999 -9999 -9999 -9999 -9999 -9999 -9999 -9999 -9999 -9999 -9999 -9999 -9999 -9999 -9999 -9999
-9999 -9999 -9999 -9999 -9999 -9999 -9999 -9999 -9999 -9999 -9999 -9999 -9999 -9999 -9999 -9999 -9999 -9999 -9999 -9999 -9999 -9999 -9999 -9999 -9999 -9999 -9999 -9999 -9999 -9999 -9999 -9999 -9999 -9999 -9999 -9999 -9999 -9999 -9999 -9999 -9999 -9999 -9999 -9999 -9999 -9999 -9999 -9999 -9999 -9999 -9999 -9999 -9999 -9999 -9999 -9999 -9999 -9999 -9999 -9999 -9999 -9999 -9999 -9999 -9999 -9999 -9999 -9999 -9999 -9999 -9999 -9999 -9999 -9999 -9999 -9999 -9999 -9999 -9999 -9999 -9999 -9999 -9999 -9999 -9999 -9999 -9999 -9999 -9999 -9999 -9999 -9999 -9999 -9999 -9999 -9999 -9999 -9999 -9999 -9999 -9999 -9999 -9999 -9999 -9999 -9999 -9999 -9999 -9999 -9999 -9999 -9999 -9999 -9999 -9999 -9999 -9999 -9999 -9999 -9999 -9999 -9999 -9999 -9999 -9999 -9999 -9999 -9999 -9999 -9999 -9999 -9999 -9999 -9999 -9999 -9999 -9999 -9999 -9999 -9999 -9999 -9999 -9999 -9999 -9999 -9999 -9999 -9999 -9999 -9999 -9999 -9999 -9999 -9999 -9999 -9999 -9999 -9999 -9999 -9999 -9999 -9999 -9999 -9999 -9999 -9999 -9999 -9999 -9999 -9999 -9999 -9999 -9999 -9999 -9999 -9999 -9999 -9999 -9999 -9999 -9999 -9999 -9999 -9999 -9999 -9999 -9999 -9999 -9999 -9999 -9999 -9999 -9999 -9999 -9999 1.56641487121582 1.6326167678833 1.55701572418213 1.60468311309814 1.24137268066406 1.22195732116699 1.40577861785889 1.31583801269531 1.49056022644043 1.46830810546875 1.57436222076416 1.41888690948486 1.45316734313965 1.0087621307373 1.65218925476074 1.65784343719482 1.63062229156494 1.51442241668701 1.4746594619751 1.92033164978027 1.85573535919189 1.93071075439453 1.92847274780273 1.9254963684082 1.91449138641357 1.9146647644043 1.62639759063721 1.48691230773926 1.53654865264893 1.50410648345947 1.38871387481689 1.40532474517822 1.58678615570068 1.55012454986572 1.92729057312012 1.87975044250488 1.85802532196045 1.82768325805664 1.81595031738281 -9999 1.703385887146 -9999 -9999 -9999 -9999 -9999 -9999 -9999 -9999 -9999 -9999 -9999 -9999 -9999 -9999 -9999 -9999 -9999 -9999 -9999 -9999 -9999 -9999 -9999 -9999 1.46504367828369 1.52121917724609 1.46986587524414 1.57592021942139 1.64559310913086 1.56819156646729 1.57295356750488 1.58023452758789 1.57316883087158 1.57849605560303 0.910354957580566 0.910592422485352 0.915410442352295 0.929644603729248 0.913171291351318 0.912443733215332 0.970867652893066 1.00713443756104 0.96481990814209 0.973297805786133 0.988871726989746 1.01798217773437 1.0202725982666 1.02090362548828 1.0205700302124 1.019208984375 1.01589466094971 1.01650543212891 1.02018711090088 1.01535507202148 1.01249324798584 1.01249073028564 1.01529750823975 1.02199081420898 1.01862327575684 1.01896602630615 1.05837524414062 1.05658996582031 1.04991073608398 1.04596881866455 1.83647380828857 1.7595626449585 1.77415214538574 1.78906494140625 1.72822929382324 1.4228759765625 1.75839248657227 1.26131240844727 1.6462601852417 1.66382251739502 1.56818264007568 1.55257232666016 1.51161952972412 1.47882740020752 1.24770126342773 0.379500503540039 0.38744384765625 0.385803565979004 -9999 -9999 -9999 -9999 -9999 -9999 -9999 -9999 -9999 -9999 -9999 -9999 -9999 -9999 -9999 -9999 -9999 -9999 -9999 -9999 -9999 -9999 -9999 -9999 -9999 -9999 -9999 -9999 -9999 -9999 -9999 -9999 -9999 -9999 -9999 -9999 -9999 -9999 -9999 -9999 -9999 -9999 -9999 -9999 -9999 -9999 -9999 -9999 -9999 -9999 -9999 -9999 -9999 -9999 -9999 -9999 -9999 -9999 -9999 -9999 -9999 -9999 -9999 -9999 -9999 -9999 -9999 -9999 -9999 -9999 -9999 -9999 -9999 -9999 -9999 -9999 -9999 -9999 -9999 -9999 -9999 -9999 -9999 -9999 -9999 -9999 -9999 -9999 -9999 -9999 -9999 -9999 -9999 -9999 -9999 -9999 -9999 -9999 -9999 -9999 -9999 -9999 -9999 -9999 -9999 -9999 -9999 -9999 -9999 -9999 -9999 -9999 -9999 -9999 -9999 -9999 -9999 -9999 -9999 -9999 -9999 -9999 -9999 -9999 -9999 -9999 -9999 -9999 -9999 -9999 -9999 -9999 -9999 -9999 -9999 -9999 -9999 -9999 -9999 -9999 -9999 -9999 -9999 -9999 -9999 -9999 -9999 -9999 -9999 -9999 -9999 -9999 -9999 -9999 -9999 -9999 -9999 -9999 -9999 -9999 -9999 -9999 -9999 -9999 -9999 -9999 -9999 -9999 -9999 -9999 -9999 -9999 -9999 -9999 -9999 -9999 -9999 -9999 -9999 -9999 -9999 -9999 -9999 -9999 -9999 -9999 -9999 -9999 -9999 -9999 -9999 -9999 -9999 -9999 -9999 -9999 -9999 -9999 -9999 -9999 -9999 -9999 -9999 -9999 -9999 -9999 -9999 -9999 -9999 -9999 -9999 -9999 -9999 -9999 -9999 -9999 -9999 -9999 -9999 -9999 -9999 -9999 -9999 -9999 -9999 -9999 -9999 -9999 -9999 -9999 -9999 -9999 -9999 -9999 -9999 -9999 -9999 -9999 -9999 -9999 -9999 -9999 -9999 -9999 -9999 -9999 -9999 -9999 -9999 -9999 -9999 -9999 -9999 -9999 -9999 -9999 -9999 -9999 -9999 -9999 -9999 -9999 -9999 -9999 -9999 -9999 -9999 -9999 -9999 -9999 -9999 -9999 -9999 -9999 -9999 -9999 -9999 -9999 -9999 -9999 -9999 -9999 -9999 -9999 -9999 -9999 -9999 -9999 -9999 -9999 -9999 -9999 -9999 -9999 -9999 -9999 -9999 -9999 -9999 -9999 -9999 -9999 -9999 -9999 -9999 -9999 -9999 -9999 -9999 -9999 -9999 -9999 -9999 -9999 -9999 -9999 -9999 -9999 -9999 -9999 -9999 -9999 -9999 -9999 -9999 -9999 -9999 -9999 -9999 -9999 -9999 -9999 -9999 -9999 -9999 -9999 -9999 -9999 -9999 -9999 -9999 -9999 -9999 -9999 -9999 -9999 -9999 -9999 -9999 -9999 -9999 -9999 -9999 -9999 -9999 -9999 -9999 -9999 -9999 -9999 -9999 -9999 -9999 -9999 -9999 -9999 -9999 -9999 -9999 -9999 -9999 -9999 -9999 -9999 -9999 -9999 -9999 -9999 -9999 -9999 -9999 -9999 -9999 -9999 -9999 -9999 -9999 -9999 -9999 -9999 -9999 -9999 -9999 -9999 -9999 -9999 -9999 -9999 -9999 -9999 -9999 -9999
-9999 -9999 -9999 -9999 -9999 -9999 -9999 -9999 -9999 -9999 -9999 -9999 -9999 -9999 -9999 -9999 -9999 -9999 -9999 -9999 -9999 -9999 -9999 -9999 -9999 -9999 -9999 -9999 -9999 -9999 -9999 -9999 -9999 -9999 -9999 -9999 -9999 -9999 -9999 -9999 -9999 -9999 -9999 -9999 -9999 -9999 -9999 -9999 -9999 -9999 -9999 -9999 -9999 -9999 -9999 -9999 -9999 -9999 -9999 -9999 -9999 -9999 -9999 -9999 -9999 -9999 -9999 -9999 -9999 -9999 -9999 -9999 -9999 -9999 -9999 -9999 -9999 -9999 -9999 -9999 -9999 -9999 -9999 -9999 -9999 -9999 -9999 -9999 -9999 -9999 -9999 -9999 -9999 -9999 -9999 -9999 -9999 -9999 -9999 -9999 -9999 -9999 -9999 -9999 -9999 -9999 -9999 -9999 -9999 -9999 -9999 -9999 -9999 -9999 -9999 -9999 -9999 -9999 -9999 -9999 -9999 -9999 -9999 -9999 -9999 -9999 -9999 -9999 -9999 -9999 -9999 -9999 -9999 -9999 -9999 -9999 -9999 -9999 -9999 -9999 -9999 -9999 -9999 -9999 -9999 -9999 -9999 -9999 -9999 -9999 -9999 -9999 -9999 -9999 -9999 -9999 -9999 -9999 -9999 -9999 -9999 -9999 -9999 -9999 -9999 -9999 -9999 -9999 -9999 -9999 -9999 -9999 -9999 -9999 -9999 -9999 -9999 -9999 -9999 -9999 -9999 -9999 -9999 1.55624153137207 1.56890705108643 -9999 1.64613109588623 1.2808988571167 1.29812828063965 1.2808179473877 0.642241172790527 1.25634258270264 1.6083768081665 1.24847911834717 1.33897979736328 1.31668750762939 1.33113567352295 1.3411109161377 1.3942414855957 0.907777462005615 1.22494422912598 0.926107692718506 0.960887031555176 0.970480842590332 1.01467620849609 1.01574554443359 1.05981262207031 1.06105167388916 1.06160110473633 1.0638000869751 1.0680883026123 1.06823638916016 1.06687202453613 1.11166500091553 1.11533718109131 1.11645652770996 1.11569469451904 1.11635501861572 1.11586601257324 1.11464813232422 1.11075702667236 1.10534992218018 1.91785743713379 1.91680400848389 1.10588962554932 1.10494731903076 1.10641742706299 1.10565982818604 1.92852653503418 1.92297225952148 1.91729656219482 1.90896057128906 1.52156970977783 2.01813652038574 1.96018890380859 1.88220542907715 1.87727634429932 1.84457817077637 -9999 -9999 1.80616687774658 -9999 1.76521511077881 1.79983245849609 1.87988536834717 1.82859844207764 1.20791370391846 1.88948810577393 1.80451274871826 1.46780960083008 1.40518398284912 1.54361801147461 1.88081760406494 1.37904350280762 1.52010280609131 1.54281578063965 1.58545154571533 1.4220378112793 1.61587886810303 1.60211505889893 1.31075214385986 1.59591934204102 1.59829696655273 1.60117160797119 1.64099933624268 1.64267097473145 1.63808258056641 1.56800800323486 1.56316921234131 1.65963054656982 1.58531284332275 0.91255199432373 0.914978713989258 0.917719230651855 0.918612270355225 0.928665046691895 0.929145011901855 0.928703899383545 0.962146339416504 1.00681789398193 1.01365550994873 1.01833740234375 1.01924697875977 1.01772068023682 1.01684303283691 1.01820327758789 1.0175511932373 1.0152710723877 1.01576740264893 1.00739479064941 1.01677803039551 1.00866451263428 1.01295181274414 1.00897682189941 1.76219078063965 1.81827953338623 1.80206073760986 1.79894519805908 1.79459243774414 1.78969413757324 1.79034496307373 1.43578090667725 1.86488067626953 1.87661281585693 1.7511531829834 1.70540473937988 1.6906551361084 1.63278888702393 1.6207738494873 1.48378314971924 1.36842418670654 1.306399269104 1.20909828186035 1.17121295928955 0.305749082565308 0.308425140380859 0.330481367111206 0.33389368057251 0.33454662322998 0.337464637756348 0.32643533706665 0.277100715637207 -9999 -9999 -9999 -9999 -9999 -9999 -9999 -9999 -9999 -9999 -9999 -9999 -9999 -9999 -9999 -9999 -9999 -9999 -9999 -9999 -9999 -9999 -9999 -9999 -9999 -9999 -9999 -9999 -9999 -9999 -9999 -9999 -9999 -9999 -9999 -9999 -9999 -9999 -9999 -9999 -9999 -9999 -9999 -9999 -9999 -9999 -9999 -9999 -9999 -9999 -9999 -9999 -9999 -9999 -9999 -9999 -9999 -9999 -9999 -9999 -9999 -9999 -9999 -9999 -9999 -9999 -9999 -9999 -9999 -9999 -9999 -9999 -9999 -9999 -9999 -9999 -9999 -9999 -9999 -9999 -9999 -9999 -9999 -9999 -9999 -9999 -9999 -9999 -9999 -9999 -9999 -9999 -9999 -9999 -9999 -9999 -9999 -9999 -9999 -9999 -9999 -9999 -9999 -9999 -9999 -9999 -9999 -9999 -9999 -9999 -9999 -9999 -9999 -9999 -9999 -9999 -9999 -9999 -9999 -9999 -9999 -9999 -9999 -9999 -9999 -9999 -9999 -9999 -9999 -9999 -9999 -9999 -9999 -9999 -9999 -9999 -9999 -9999 -9999 -9999 -9999 -9999 -9999 -9999 -9999 -9999 -9999 -9999 -9999 -9999 -9999 -9999 -9999 -9999 -9999 -9999 -9999 -9999 -9999 -9999 -9999 -9999 -9999 -9999 -9999 -9999 -9999 -9999 -9999 -9999 -9999 -9999 -9999 -9999 -9999 -9999 -9999 -9999 -9999 -9999 -9999 -9999 -9999 -9999 -9999 -9999 -9999 -9999 -9999 -9999 -9999 -9999 -9999 -9999 -9999 -9999 -9999 -9999 -9999 -9999 -9999 -9999 -9999 -9999 -9999 -9999 -9999 -9999 -9999 -9999 -9999 -9999 -9999 -9999 -9999 -9999 -9999 -9999 -9999 -9999 -9999 -9999 -9999 -9999 -9999 -9999 -9999 -9999 -9999 -9999 -9999 -9999 -9999 -9999 -9999 -9999 -9999 -9999 -9999 -9999 -9999 -9999 -9999 -9999 -9999 -9999 -9999 -9999 -9999 -9999 -9999 -9999 -9999 -9999 -9999 -9999 -9999 -9999 -9999 -9999 -9999 -9999 -9999 -9999 -9999 -9999 -9999 -9999 -9999 -9999 -9999 -9999 -9999 -9999 -9999 -9999 -9999 -9999 -9999 -9999 -9999 -9999 -9999 -9999 -9999 -9999 -9999 -9999 -9999 -9999 -9999 -9999 -9999 -9999 -9999 -9999 -9999 -9999 -9999 -9999 -9999 -9999 -9999 -9999 -9999 -9999 -9999 -9999 -9999 -9999 -9999 -9999 -9999 -9999 -9999 -9999 -9999 -9999 -9999 -9999 -9999 -9999 -9999 -9999 -9999 -9999 -9999 -9999 -9999 -9999 -9999 -9999 -9999 -9999 -9999 -9999 -9999 -9999 -9999 -9999 -9999 -9999 -9999 -9999 -9999 -9999 -9999 -9999 -9999 -9999 -9999 -9999 -9999 -9999 -9999 -9999 -9999 -9999 -9999 -9999 -9999 -9999 -9999 -9999 -9999 -9999 -9999 -9999 -9999 -9999 -9999 -9999 -9999 -9999 -9999 -9999 -9999 -9999 -9999 -9999 -9999 -9999 -9999 -9999 -9999 -9999 -9999 -9999 -9999 -9999 -9999 -9999 -9999 -9999 -9999 -9999 -9999 -9999
-9999 -9999 -9999 -9999 -9999 -9999 -9999 -9999 -9999 -9999 -9999 -9999 -9999 -9999 -9999 -9999 -9999 -9999 -9999 -9999 -9999 -9999 -9999 -9999 -9999 -9999 -9999 -9999 -9999 -9999 -9999 -9999 -9999 -9999 -9999 -9999 -9999 -9999 -9999 -9999 -9999 -9999 -9999 -9999 -9999 -9999 -9999 -9999 -9999 -9999 -9999 -9999 -9999 -9999 -9999 -9999 -9999 -9999 -9999 -9999 -9999 -9999 -9999 -9999 -9999 -9999 -9999 -9999 -9999 -9999 -9999 -9999 -9999 -9999 -9999 -9999 -9999 -9999 -9999 -9999 -9999 -9999 -9999 -9999 -9999 -9999 -9999 -9999 -9999 -9999 -9999 -9999 -9999 -9999 -9999 -9999 -9999 -9999 -9999 -9999 -9999 -9999 -9999 -9999 -9999 -9999 -9999 -9999 -9999 -9999 -9999 -9999 -9999 -9999 -9999 -9999 -9999 -9999 -9999 -9999 -9999 -9999 -9999 -9999 -9999 -9999 -9999 -9999 -9999 -9999 -9999 -9999 -9999 -9999 -9999 -9999 -9999 -9999 -9999 -9999 -9999 -9999 -9999 -9999 -9999 -9999 -9999 -9999 -9999 -9999 -9999 -9999 -9999 -9999 -9999 -9999 -9999 -9999 -9999 -9999 -9999 -9999 -9999 -9999 -9999 -9999 -9999 -9999 -9999 -9999 -9999 -9999 -9999 -9999 -9999 -9999 1.26610347747803 1.32324005126953 1.77526405334473 1.26866500854492 1.27196090698242 1.28171070098877 1.39689239501953 1.47960342407227 1.44966018676758 1.35088977813721 1.38926399230957 1.16321193695068 1.16164295196533 1.20231674194336 0.902346496582031 0.945006465911865 0.91059247970581 0.910377559661865 0.910147132873535 0.90261697769165 0.903109645843506 0.951375503540039 0.951110515594482 0.953850288391113 0.91903736114502 0.907914619445801 0.910491714477539 0.921889629364014 0.913300037384033 0.912811832427978 0.927974452972412 0.963507843017578 1.00982666015625 1.01065830230713 1.01411155700684 1.05861591339111 1.05415271759033 1.05248931884766 1.84040016174316 1.83973491668701 1.82485874176025 1.49720008850098 1.87984554290771 1.69504669189453 1.68878974914551 1.76082870483398 1.79924961090088 1.80587390899658 1.86115573883057 1.82200218200684 1.79267280578613 1.82111309051514 1.94246955871582 1.9532551574707 1.88334651947021 1.89450325012207 1.91236724853516 1.75977699279785 1.84317420959473 -9999 1.82563945770264 1.80011455535889 1.83321556091309 1.90871772766113 1.81560195922852 1.74063514709473 1.80949310302734 1.83520774841309 1.47237007141113 1.50606594085693 1.85997825622559 1.86571781158447 1.87198276519775 1.8703577041626 1.8587121963501 1.44405429840088 1.83661319732666 1.76109523773193 1.79150436401367 1.78739799499512 1.78033802032471 1.77649509429932 1.77434864044189 1.76054798126221 1.81693599700928 1.81934795379639 1.81961242675781 1.82535255432129 1.82627311706543 1.74646751403809 1.72614933013916 1.73720249176025 1.65588180541992 1.70964088439941 1.65757175445557 1.66604782104492 0.965366477966309 0.968846969604492 0.969327507019043 0.970762939453125 1.01429271697998 0.970238800048828 0.9326930809021 0.972588272094727 0.939851360321045 1.02048133850098 1.03282768249512 1.020491065979 1.02260593414307 1.02180324554443 1.01630790710449 1.01488563537598 1.01233291625977 1.01331665039063 1.05306049346924 1.83139869689941 1.81995346069336 1.82211811065674 1.83367183685303 1.83663093566895 1.81952911376953 1.81775081634521 1.80655506134033 1.81905338287354 1.82847106933594 1.81724555969238 1.80553607940674 1.79320701599121 1.87087966918945 1.79866298675537 1.67271778106689 1.64035903930664 0.329435148239136 1.53479507446289 1.51616981506348 1.58877113342285 1.66655582427979 1.60428028106689 1.10400535583496 0.352538766860962 0.32189154624939 0.312634477615356 0.670121269226074 0.640915145874023 0.297527189254761 0.302651081085205 0.295499954223633 0.292936563491821 1.39792465209961 1.48959938049316 0.443738794326782 0.632526569366455 1.05898899078369 0.979344520568848 0.874857330322266 0.624057312011719 0.497049808502197 0.361701765060425 0.3511669921875 0.31418249130249 0.471262292861938 -9999 -9999 -9999 -9999 -9999 -9999 -9999 -9999 -9999 -9999 -9999 -9999 -9999 -9999 -9999 -9999 -9999 -9999 -9999 -9999 -9999 -9999 -9999 -9999 -9999 -9999 -9999 -9999 -9999 -9999 -9999 -9999 -9999 -9999 -9999 -9999 -9999 -9999 -9999 -9999 -9999 -9999 -9999 -9999 -9999 -9999 -9999 -9999 -9999 -9999 -9999 -9999 -9999 -9999 -9999 -9999 -9999 -9999 -9999 -9999 -9999 -9999 -9999 -9999 -9999 -9999 -9999 -9999 -9999 -9999 -9999 -9999 -9999 -9999 -9999 -9999 -9999 -9999 -9999 -9999 -9999 -9999 -9999 -9999 -9999 -9999 -9999 -9999 -9999 -9999 -9999 -9999 -9999 -9999 -9999 -9999 -9999 -9999 -9999 -9999 -9999 -9999 -9999 -9999 -9999 -9999 -9999 -9999 -9999 -9999 -9999 -9999 -9999 -9999 -9999 -9999 -9999 -9999 -9999 -9999 -9999 -9999 -9999 -9999 -9999 -9999 -9999 -9999 -9999 -9999 -9999 -9999 -9999 -9999 -9999 -9999 -9999 -9999 1.65558368682861 1.6860721206665 1.7329955291748 1.6754220199585 -9999 -9999 -9999 -9999 -9999 1.56866352081299 1.58929252624512 1.66624923706055 1.58084232330322 -9999 -9999 -9999 -9999 -9999 -9999 -9999 -9999 -9999 -9999 -9999 -9999 -9999 -9999 -9999 -9999 -9999 -9999 -9999 -9999 -9999 -9999 -9999 -9999 -9999 -9999 -9999 -9999 -9999 -9999 -9999 -9999 -9999 -9999 -9999 -9999 -9999 -9999 -9999 -9999 -9999 -9999 -9999 -9999 -9999 -9999 -9999 -9999 -9999 -9999 -9999 -9999 -9999 -9999 -9999 -9999 -9999 -9999 -9999 -9999 -9999 -9999 -9999 -9999 -9999 -9999 -9999 -9999 -9999 -9999 -9999 -9999 -9999 -9999 -9999 -9999 -9999 -9999 -9999 -9999 -9999 -9999 -9999 -9999 -9999 -9999 -9999 -9999 -9999 -9999 -9999 -9999 -9999 -9999 -9999 -9999 -9999 -9999 -9999 -9999 -9999 -9999 -9999 -9999 -9999 -9999 -9999 -9999 -9999 -9999 -9999 -9999 -9999 -9999 -9999 -9999 -9999 -9999 -9999 -9999 -9999 -9999 -9999 -9999 -9999 -9999 -9999 -9999 -9999 -9999 -9999 -9999 -9999 -9999 -9999 -9999 -9999 -9999 -9999 -9999 -9999 -9999 -9999 -9999 -9999 -9999 -9999 -9999 -9999 -9999 -9999 -9999 -9999 -9999 -9999 -9999 -9999 -9999 -9999 -9999 -9999 -9999 -9999 -9999 -9999 -9999 -9999 -9999 -9999 -9999 -9999 -9999 -9999 -9999 -9999 -9999 -9999 -9999 -9999 -9999 -9999 -9999 -9999 -9999 -9999 -9999 -9999 -9999 -9999 -9999 -9999 -9999 -9999 -9999 -9999 -9999 -9999 -9999 -9999 -9999 -9999 -9999 -9999 -9999 -9999 -9999 -9999 -9999 -9999 -9999 -9999 -9999 -9999 -9999 -9999 -9999 -9999 -9999 -9999 -9999 -9999 -9999 -9999 -9999 -9999 -9999 -9999 -9999 -9999 -9999 -9999 -9999
-9999 -9999 -9999 -9999 -9999 -9999 -9999 -9999 -9999 -9999 -9999 -9999 -9999 -9999 -9999 -9999 -9999 -9999 -9999 -9999 -9999 -9999 -9999 -9999 -9999 -9999 -9999 -9999 -9999 -9999 -9999 -9999 -9999 -9999 -9999 -9999 -9999 -9999 -9999 -9999 -9999 -9999 -9999 -9999 -9999 -9999 -9999 -9999 -9999 -9999 -9999 -9999 -9999 -9999 -9999 -9999 -9999 -9999 -9999 -9999 -9999 -9999 -9999 -9999 -9999 -9999 -9999 -9999 -9999 -9999 -9999 -9999 -9999 -9999 -9999 -9999 -9999 -9999 -9999 -9999 -9999 -9999 -9999 -9999 -9999 -9999 -9999 -9999 -9999 -9999 -9999 -9999 -9999 -9999 -9999 -9999 -9999 -9999 -9999 -9999 -9999 -9999 -9999 -9999 -9999 -9999 -9999 -9999 -9999 -9999 -9999 -9999 -9999 -9999 -9999 -9999 -9999 -9999 -9999 -9999 -9999 -9999 -9999 -9999 -9999 -9999 -9999 -9999 -9999 -9999 -9999 -9999 -9999 -9999 -9999 -9999 -9999 -9999 -9999 -9999 -9999 -9999 -9999 -9999 -9999 -9999 -9999 -9999 -9999 -9999 -9999 -9999 -9999 -9999 -9999 -9999 -9999 -9999 -9999 -9999 -9999 -9999 -9999 -9999 -9999 -9999 -9999 -9999 -9999 -9999 -9999 1.64143089294434 1.67512813568115 1.68304389953613 1.7645316696167 1.69563194274902 1.19983520507812 -9999 1.43815200805664 1.35972118377686 1.51964538574219 1.13584259033203 1.57605640411377 1.58049682617188 1.16763187408447 1.25615123748779 1.20049976348877 1.21909343719482 1.18023662567139 1.20506298065186 1.28920291900635 1.36697776794434 0.801112289428711 0.802925262451172 0.799274311065674 0.842647247314453 0.893957862854004 0.946843242645264 0.948373603820801 0.939999389648437 0.947435188293457 1.58859294891357 1.42256000518799 0.944359588623047 0.943074531555176 0.944362277984619 0.949401683807373 0.948263626098633 0.947480220794678 0.950530071258545 0.948614158630371 0.948396606445312 1.74778244018555 1.74487632751465 1.74559879302979 1.81959411621094 1.23358818054199 1.16726600646973 0.848556690216064 1.70099040985107 1.74766662597656 1.88856388092041 1.7897989654541 1.73335807800293 1.77902629852295 1.77707233428955 1.65903888702393 1.69781536102295 1.67480094909668 1.71400897979736 1.7078556060791 1.92803833007812 1.99481460571289 1.75854869842529 1.7325980758667 0.334425888061523 0.38041823387146 0.380303192138672 1.53758628845215 1.89266944885254 1.89544967651367 1.89293769836426 1.89853202819824 1.88509185791016 1.88937480926514 1.87949993133545 1.88318515777588 1.87845520019531 1.88541893005371 1.87266815185547 1.86421188354492 1.86696796417236 1.87492332458496 1.88094772338867 1.89280666351318 1.89737880706787 1.89457717895508 1.89015312194824 1.80943988800049 1.80019031524658 1.80611309051514 1.81420085906982 1.82389892578125 1.82694923400879 1.83162963867187 1.83001064300537 1.83394546508789 1.83525352478027 1.84257614135742 1.05471622467041 1.05512512207031 1.05603675842285 1.0581037902832 1.05929122924805 1.02251815795898 1.03380512237549 1.02708904266357 1.04051204681396 1.07201248168945 1.07992332458496 1.07086750030518 1.03240001678467 1.03498168945312 1.03633117675781 1.08049152374268 1.06473403930664 1.02476921081543 1.02267402648926 1.06427993774414 1.06647468566895 1.06433784484863 1.05684505462646 1.05556686401367 1.05218639373779 1.01788146972656 1.83274955749512 1.82237457275391 1.81830013275146 1.80119499206543 1.80379245758057 1.80255878448486 1.80127544403076 1.78827095031738 1.42209846496582 1.45120376586914 1.88186576843262 1.88707294464111 1.83097503662109 1.7492240524292 1.83097526550293 1.77745079040527 1.72603637695312 1.59043395996094 0.719435520172119 0.534809589385986 0.670524845123291 1.30130115509033 1.46300239562988 1.50176422119141 1.56465854644775 1.614807472229 1.55674140930176 0.797248191833496 1.16079357147217 1.23459743499756 1.24638507843018 1.25260940551758 1.1899613571167 1.07809604644775 0.764758758544922 0.400807342529297 0.377304010391235 1.50173435211182 0.310162954330444 0.317659521102905 0.31115701675415 0.453131532669067 0.402534999847412 -9999 -9999 -9999 -9999 -9999 -9999 -9999 -9999 -9999 -9999 -9999 -9999 -9999 -9999 -9999 -9999 -9999 -9999 -9999 -9999 -9999 -9999 -9999 -9999 -9999 -9999 -9999 -9999 -9999 -9999 -9999 -9999 -9999 -9999 -9999 -9999 -9999 -9999 -9999 -9999 -9999 -9999 -9999 -9999 -9999 -9999 -9999 -9999 -9999 -9999 -9999 -9999 -9999 -9999 -9999 -9999 -9999 -9999 -9999 -9999 -9999 -9999 -9999 -9999 -9999 -9999 -9999 -9999 -9999 -9999 -9999 -9999 -9999 -9999 -9999 -9999 -9999 -9999 -9999 -9999 -9999 -9999 -9999 -9999 -9999 -9999 -9999 -9999 -9999 -9999 -9999 -9999 -9999 -9999 -9999 -9999 -9999 -9999 -9999 -9999 -9999 -9999 -9999 -9999 -9999 -9999 -9999 -9999 -9999 -9999 -9999 -9999 -9999 -9999 -9999 -9999 -9999 -9999 -9999 -9999 -9999 -9999 -9999 -9999 -9999 -9999 -9999 -9999 -9999 -9999 -9999 1.38381477355957 -9999 1.583196144104 1.55900482177734 0.198606948852539 0.227196564674377 0.216968779563904 1.7220193862915 -9999 -9999 -9999 -9999 1.60141948699951 1.27918155670166 1.11250019073486 -9999 -9999 -9999 -9999 1.39433784484863 1.40467128753662 1.58321685791016 -9999 -9999 -9999 -9999 -9999 -9999 -9999 -9999 -9999 -9999 -9999 -9999 -9999 -9999 -9999 -9999 -9999 -9999 -9999 -9999 -9999 -9999 -9999 -9999 -9999 -9999 -9999 -9999 -9999 -9999 -9999 -9999 -9999 -9999 -9999 -9999 -9999 -9999 -9999 -9999 -9999 -9999 -9999 -9999 -9999 -9999 -9999 -9999 0.758577518463135 0.502622222900391 0.101820130348206 0.502991809844971 -9999 -9999 -9999 -9999 -9999 0.868490924835205 0.868350791931152 0.303176250457764 0.293358535766602 0.793559074401855 -9999 -9999 -9999 -9999 -9999 -9999 -9999 -9999 -9999 -9999 -9999 -9999 -9999 -9999 -9999 -9999 -9999 -9999 -9999 -9999 -9999 -9999 -9999 -9999 -9999 -9999 -9999 -9999 -9999 -9999 -9999 -9999 -9999 -9999 -9999 -9999 -9999 -9999 -9999 -9999 -9999 -9999 -9999 -9999 -9999 -9999 -9999 -9999 -9999 -9999 -9999 -9999 -9999 -9999 -9999 -9999 -9999 -9999 -9999 -9999 -9999 -9999 -9999 -9999 -9999 -9999 -9999 -9999 -9999 -9999 -9999 -9999 -9999 -9999 -9999 -9999 -9999 -9999 -9999 -9999 -9999 -9999 -9999 -9999 -9999 -9999 -9999 -9999 -9999 -9999 -9999 -9999 -9999 -9999 -9999 -9999 -9999 -9999 -9999 -9999 -9999 -9999 -9999 -9999 -9999 -9999 -9999 -9999 -9999 -9999 -9999 -9999 -9999 -9999 -9999 -9999 -9999 -9999 -9999 -9999 -9999 -9999 -9999 -9999 -9999 -9999 -9999 -9999 -9999 -9999 -9999 -9999 -9999 -9999 -9999 -9999 -9999 -9999 -9999 -9999 -9999 -9999 -9999 -9999 -9999 -9999 -9999 -9999 -9999 -9999 -9999 -9999 -9999 -9999 -9999 -9999 -9999 -9999 -9999 -9999 -9999 -9999 -9999 -9999 -9999 -9999 -9999
-9999 -9999 -9999 -9999 -9999 -9999 -9999 -9999 -9999 -9999 -9999 -9999 -9999 -9999 -9999 -9999 -9999 -9999 -9999 -9999 -9999 -9999 -9999 -9999 -9999 -9999 -9999 -9999 -9999 -9999 -9999 -9999 -9999 -9999 -9999 -9999 -9999 -9999 -9999 -9999 -9999 -9999 -9999 -9999 -9999 -9999 -9999 -9999 -9999 -9999 -9999 -9999 -9999 -9999 -9999 -9999 -9999 -9999 -9999 -9999 -9999 -9999 -9999 -9999 -9999 -9999 -9999 -9999 -9999 -9999 -9999 -9999 -9999 -9999 -9999 -9999 -9999 -9999 -9999 -9999 -9999 -9999 -9999 -9999 -9999 -9999 -9999 -9999 -9999 -9999 -9999 -9999 -9999 -9999 -9999 -9999 -9999 -9999 -9999 -9999 -9999 -9999 -9999 -9999 -9999 -9999 -9999 -9999 -9999 -9999 -9999 -9999 -9999 -9999 -9999 -9999 -9999 -9999 -9999 -9999 -9999 -9999 -9999 -9999 -9999 -9999 -9999 -9999 -9999 -9999 -9999 -9999 -9999 -9999 -9999 -9999 -9999 -9999 -9999 -9999 -9999 -9999 -9999 -9999 -9999 -9999 -9999 -9999 -9999 -9999 -9999 -9999 -9999 -9999 -9999 -9999 -9999 -9999 -9999 -9999 -9999 -9999 -9999 -9999 -9999 -9999 -9999 1.2885619354248 1.74506652832031 1.72386268615723 1.46298969268799 1.53733497619629 1.60287265777588 1.47338218688965 0.899785137176514 0.899185810089111 0.893246269226074 1.35130268096924 1.55626899719238 -9999 -9999 1.37176151275635 1.37210517883301 1.50576942443848 1.16551414489746 1.14581439971924 1.365263671875 1.21607345581055 1.33736995697021 1.43822113037109 1.09176567077637 1.09091068267822 1.03687923431396 1.14942054748535 1.18488224029541 1.1981498336792 1.27628952026367 1.19556266784668 1.06517646789551 1.47892776489258 1.42741996765137 1.44894550323486 1.17889709472656 1.2031640625 1.31052406311035 0.936205501556396 0.932297916412353 0.929775295257568 0.944071941375732 0.940175685882568 0.944742794036865 0.948514080047607 0.95523645401001 0.955216541290283 0.999623908996582 1.0009748840332 1.7426501083374 1.24297348022461 1.80689151763916 1.82235786437988 1.81206481933594 1.88041030883789 1.46006195068359 1.70661563873291 1.69406730651855 1.56736289978027 1.42898975372314 1.48816360473633 1.40715591430664 1.50061214447021 1.68853248596191 1.88642223358154 1.33643932342529 0.735026321411133 1.84700466156006 1.34777858734131 1.41581771850586 1.92289855957031 0.412690229415894 0.380676612854004 1.24498764038086 1.33755226135254 1.87866371154785 1.87750980377197 1.90928787231445 1.91763324737549 1.92548515319824 1.92608825683594 1.92697746276855 1.92624320983887 1.92348976135254 1.92155548095703 1.92191963195801 1.92402809143066 1.92439910888672 1.92826812744141 1.92787399291992 1.92954986572266 1.9321556854248 1.10435440063477 1.10528182983398 1.10702648162842 1.10611976623535 1.10858619689941 1.09780632019043 1.10170623779297 1.10182353973389 1.10162773132324 1.09722106933594 1.06546772003174 1.06739742279053 1.06783195495605 1.06898334503174 1.06983478546143 1.08070220947266 1.07171058654785 1.11933128356934 1.12156356811523 1.12205303192139 1.12194488525391 1.1323592376709 1.16403476715088 1.16023818969727 1.16447387695312 1.12217594146729 1.12370956420898 1.1632470703125 1.1169128036499 1.07530403137207 1.11206188201904 1.06749607086182 1.07849727630615 1.07155563354492 1.07127731323242 1.06541816711426 1.06597057342529 1.06437217712402 1.06408813476563 1.05914806365967 1.05692070007324 1.83753799438477 1.82969341278076 1.81109539031982 1.80557716369629 1.52046947479248 1.8245093536377 1.75646781921387 1.73142185211182 1.62940578460693 1.61489570617676 1.36441165924072 1.51264835357666 1.01784404754639 1.58175624847412 1.1799361038208 1.09001861572266 1.71107574462891 1.57792785644531 1.43625034332275 1.62334041595459 1.60775081634521 1.29393619537354 1.21603408813477 1.40033351898193 1.39515449523926 1.38966167449951 0.362592315673828 1.30366344451904 0.901154651641846 0.412864122390747 0.370569362640381 0.388041343688965 0.436362819671631 0.371324186325073 -9999 -9999 -9999 -9999 -9999 -9999 -9999 -9999 -9999 -9999 -9999 -9999 -9999 -9999 -9999 -9999 -9999 -9999 -9999 -9999 -9999 -9999 -9999 -9999 -9999 -9999 -9999 -9999 -9999 -9999 -9999 -9999 -9999 -9999 -9999 -9999 -9999 -9999 -9999 -9999 -9999 -9999 -9999 -9999 -9999 -9999 -9999 -9999 -9999 -9999 -9999 -9999 -9999 -9999 -9999 -9999 -9999 -9999 -9999 -9999 -9999 -9999 -9999 -9999 -9999 -9999 -9999 -9999 -9999 -9999 -9999 -9999 -9999 -9999 -9999 -9999 -9999 -9999 -9999 -9999 -9999 -9999 -9999 -9999 -9999 -9999 -9999 -9999 -9999 -9999 -9999 -9999 -9999 -9999 -9999 -9999 -9999 -9999 -9999 -9999 -9999 -9999 -9999 -9999 -9999 -9999 -9999 -9999 -9999 -9999 -9999 -9999 -9999 -9999 -9999 -9999 0.61988582611084 0.624340095520019 0.846791839599609 0.73183931350708 0.253884544372559 0.490160007476807 0.2051522397995 0.899151592254639 0.197264442443848 0.167424187660217 0.161667265892029 0.153055672645569 0.666738452911377 0.665503635406494 -9999 -9999 -9999 -9999 0.834022750854492 1.08065483093262 0.197685499191284 0.195948801040649 0.238631286621094 0.207841572761536 0.224442315101624 0.260538368225098 0.234132442474365 0.221702513694763 1.08075634002686 0.216439075469971 0.236663117408752 0.271092338562012 0.272511749267578 0.210040411949158 1.02115345001221 0.93492130279541 0.213312349319458 0.249326906204224 0.201829533576965 0.189876022338867 0.964033012390137 -9999 -9999 -9999 -9999 -9999 -9999 -9999 -9999 -9999 -9999 -9999 -9999 -9999 -9999 -9999 -9999 -9999 -9999 -9999 -9999 -9999 -9999 -9999 -9999 -9999 -9999 -9999 1.05746063232422 1.06988834381104 0.986779518127441 -9999 -9999 -9999 -9999 -9999 -9999 -9999 -9999 -9999 -9999 -9999 -9999 -9999 -9999 -9999 -9999 -9999 -9999 -9999 -9999 -9999 -9999 -9999 -9999 0.852980632781982 0.596619815826416 0.897698707580566 0.120842471122742 0.132161521911621 0.113705685138702 0.118217554092407 0.104392611980438 0.099392659664154 0.295286808013916 0.783890933990478 -9999 -9999 -9999 -9999 -9999 -9999 -9999 -9999 -9999 -9999 -9999 -9999 -9999 -9999 -9999 -9999 -9999 -9999 -9999 -9999 -9999 -9999 -9999 -9999 -9999 -9999 -9999 -9999 -9999 -9999 -9999 -9999 -9999 -9999 -9999 -9999 -9999 -9999 -9999 -9999 -9999 -9999 -9999 -9999 -9999 -9999 -9999 -9999 -9999 -9999 -9999 -9999 -9999 -9999 -9999 -9999 -9999 -9999 -9999 -9999 -9999 -9999 -9999 -9999 -9999 -9999 -9999 -9999 -9999 -9999 -9999 -9999 -9999 -9999 -9999 -9999 -9999 -9999 -9999 -9999 -9999 -9999 -9999 -9999 -9999 -9999 -9999 -9999 -9999 -9999 -9999 -9999 -9999 -9999 -9999 -9999 -9999 -9999 -9999 -9999 -9999 -9999 -9999 -9999 -9999 -9999 -9999 -9999 -9999 -9999 -9999 -9999 -9999 -9999 -9999 -9999 -9999 -9999 -9999 -9999 -9999 -9999 -9999 -9999 -9999 -9999 -9999 -9999 -9999 -9999 -9999 -9999 -9999 -9999 -9999 -9999 -9999 -9999 -9999 -9999 -9999 -9999 -9999 -9999 -9999 -9999 -9999 -9999 -9999 -9999 -9999 -9999 -9999 -9999 -9999 -9999 -9999 -9999 -9999 -9999 -9999 -9999 -9999 -9999
-9999 -9999 -9999 -9999 -9999 -9999 -9999 -9999 -9999 -9999 -9999 -9999 -9999 -9999 -9999 -9999 -9999 -9999 -9999 -9999 -9999 -9999 -9999 -9999 -9999 -9999 -9999 -9999 -9999 -9999 -9999 -9999 -9999 -9999 -9999 -9999 -9999 -9999 -9999 -9999 -9999 -9999 -9999 -9999 -9999 -9999 -9999 -9999 -9999 -9999 -9999 -9999 -9999 -9999 -9999 -9999 -9999 -9999 -9999 -9999 -9999 -9999 -9999 -9999 -9999 -9999 -9999 -9999 -9999 -9999 -9999 -9999 -9999 -9999 -9999 -9999 -9999 -9999 -9999 -9999 -9999 -9999 -9999 -9999 -9999 -9999 -9999 -9999 -9999 -9999 -9999 -9999 -9999 -9999 -9999 -9999 -9999 -9999 -9999 -9999 -9999 -9999 -9999 -9999 -9999 -9999 -9999 -9999 -9999 -9999 -9999 -9999 -9999 -9999 -9999 -9999 -9999 -9999 -9999 -9999 -9999 -9999 -9999 -9999 -9999 -9999 -9999 -9999 -9999 -9999 -9999 -9999 -9999 -9999 -9999 -9999 -9999 -9999 -9999 -9999 -9999 -9999 -9999 -9999 -9999 -9999 -9999 -9999 -9999 -9999 -9999 -9999 -9999 -9999 -9999 -9999 -9999 -9999 -9999 1.715104637146 1.66406799316406 1.67571430206299 -9999 -9999 -9999 -9999 1.67422840118408 1.73942241668701 1.3275617980957 1.32134410858154 1.5224853515625 0.942897891998291 1.58466453552246 0.896953353881836 0.899546642303467 0.897564125061035 0.89694356918335 0.89628324508667 0.893866195678711 0.848244209289551 1.04329845428467 0.511575050354004 1.31776062011719 1.2573218536377 1.23406116485596 -9999 0.995353775024414 1.02959495544434 1.10733192443848 1.12078662872314 1.04315769195557 0.952413825988769 0.432527103424072 0.706639652252197 1.21678928375244 1.37849922180176 1.07797004699707 1.15634582519531 1.21294979095459 0.79178295135498 0.794027366638184 0.7947780418396 0.794781475067139 0.794565353393555 0.795590229034424 0.843383846282959 0.842714138031006 0.844348697662353 0.842342147827148 0.841323509216309 0.84034309387207 0.899132022857666 1.64799900054932 1.62966979980469 1.6311735534668 1.3582133102417 1.31420024871826 1.71767280578613 1.50856910705566 1.50134010314941 1.75978935241699 1.76614437103271 -9999 -9999 -9999 0.588420867919922 1.45325614929199 1.50042251586914 0.368422737121582 1.485475730896 1.62385837554932 1.65219554901123 1.61416168212891 1.72152912139893 1.77825885772705 1.76943134307861 1.8380196762085 1.88107955932617 1.8811994934082 1.77443824768066 1.7724914932251 1.23059761047363 1.83599979400635 1.8369994354248 1.8528178024292 1.87173763275146 1.89361461639404 1.90722095489502 1.9199592590332 1.9223966217041 1.92703765869141 1.92836952209473 1.10579246520996 1.10701366424561 1.10692989349365 1.10751480102539 1.10880958557129 1.11015026092529 1.11032970428467 1.11102310180664 1.11344970703125 1.1141333770752 1.11600219726562 1.11621368408203 1.11733726501465 1.11805812835693 1.1185954284668 1.11899471282959 1.11929431915283 1.11952766418457 1.11982521057129 1.11946689605713 1.12076236724854 1.12106002807617 1.12096481323242 1.12230880737305 1.12218692779541 1.17060791015625 1.1713138961792 1.17045890808105 1.1628133392334 1.16708919525146 1.17073963165283 1.21541931152344 1.17824363708496 1.17247283935547 1.16369956970215 1.12950267791748 1.16752853393555 1.16212760925293 1.07796192169189 1.07108631134033 1.02266532897949 1.02254711151123 1.03171360015869 1.02181938171387 1.05940498352051 1.06193161010742 1.05711421966553 1.05398815155029 1.05234924316406 1.83073413848877 1.8231941986084 1.80525329589844 1.77943542480469 1.28324592590332 1.12686492919922 1.63617141723633 1.44127841949463 1.3592749786377 1.11167907714844 1.45446613311768 1.54347713470459 1.5237756729126 1.56054405212402 1.57081558227539 1.44654693603516 1.43944725036621 1.42458377838135 1.40445934295654 1.32017749786377 1.40597408294678 1.31189678192139 1.35848384857178 0.385579948425293 0.289687614440918 0.351510972976685 0.206497192382812 -9999 -9999 -9999 -9999 -9999 -9999 -9999 -9999 -9999 -9999 -9999 -9999 -9999 -9999 -9999 -9999 -9999 -9999 -9999 -9999 -9999 -9999 -9999 -9999 -9999 -9999 -9999 -9999 -9999 -9999 -9999 -9999 -9999 -9999 -9999 -9999 -9999 -9999 -9999 -9999 -9999 -9999 -9999 -9999 -9999 -9999 -9999 -9999 -9999 -9999 -9999 -9999 -9999 -9999 -9999 -9999 -9999 -9999 -9999 -9999 -9999 -9999 -9999 -9999 -9999 -9999 -9999 -9999 0.219903388023376 0.224885759353638 0.235042662620544 0.236245794296265 0.312356185913086 0.252946014404297 0.234515705108643 0.250576629638672 1.11449890136719 0.234021806716919 0.228693008422852 0.229621152877808 0.232343916893005 0.231931171417236 0.233585586547852 0.23107855796814 1.59549522399902 1.4776834487915 1.20691772460937 -9999 -9999 -9999 -9999 -9999 -9999 -9999 -9999 0.763709564208984 0.710894737243652 0.710601367950439 0.717351779937744 -9999 -9999 -9999 -9999 -9999 -9999 -9999 -9999 -9999 -9999 -9999 -9999 -9999 -9999 -9999 -9999 -9999 -9999 -9999 -9999 -9999 -9999 -9999 -9999 -9999 0.516772899627686 0.43605806350708 0.245427188873291 0.236794509887695 0.193364839553833 0.186112632751465 0.680094223022461 0.153319630622864 0.151767225265503 -9999 -9999 -9999 1.03285194396973 0.728225727081299 0.121862053871155 0.5966477394104 -9999 -9999 -9999 0.534071445465088 0.180510120391846 0.195475401878357 1.09127872467041 0.19723247051239 1.12659713745117 0.949901733398437 0.775235538482666 0.186112761497498 1.71780979156494 1.70839965820312 1.61508029937744 -9999 -9999 -9999 -9999 -9999 -9999 -9999 -9999 -9999 -9999 -9999 -9999 -9999 -9999 -9999 -9999 -9999 -9999 -9999 -9999 -9999 -9999 -9999 -9999 -9999 -9999 -9999 -9999 -9999 -9999 -9999 -9999 -9999 -9999 -9999 -9999 -9999 -9999 -9999 -9999 -9999 -9999 -9999 -9999 -9999 -9999 -9999 -9999 -9999 -9999 -9999 -9999 -9999 -9999 -9999 -9999 -9999 -9999 -9999 -9999 0.814723892211914 0.252202234268188 0.09712406873703 0.0997417616844177 0.122413201332092 0.116608994007111 0.1321928358078 0.116123478412628 0.104714341163635 0.128440461158752 0.109381778240204 0.110109865665436 0.186802940368652 -9999 -9999 -9999 -9999 -9999 -9999 -9999 -9999 -9999 -9999 -9999 -9999 -9999 -9999 -9999 -9999 -9999 -9999 -9999 -9999 -9999 -9999 -9999 -9999 -9999 -9999 -9999 -9999 -9999 -9999 -9999 -9999 -9999 -9999 -9999 -9999 -9999 -9999 -9999 -9999 -9999 -9999 -9999 -9999 -9999 -9999 -9999 -9999 -9999 -9999 -9999 -9999 -9999 -9999 -9999 -9999 -9999 -9999 -9999 -9999 -9999 -9999 -9999 -9999 -9999 -9999 -9999 -9999 -9999 -9999 -9999 -9999 -9999 -9999 -9999 -9999 -9999 -9999 -9999 -9999 -9999 -9999 -9999 -9999 -9999 -9999 -9999 -9999 -9999 -9999 -9999 -9999 -9999 -9999 -9999 -9999 -9999 -9999 -9999 -9999 -9999 -9999 -9999 -9999 -9999 -9999 -9999 -9999 -9999 -9999 -9999 -9999 -9999 -9999 -9999 -9999 -9999 -9999 -9999 -9999 -9999 -9999 -9999 -9999 -9999 -9999 -9999 -9999 -9999 -9999 -9999 -9999 -9999 -9999 -9999 -9999 -9999 -9999 -9999 -9999 -9999 -9999 -9999 -9999 -9999 -9999 -9999 -9999 -9999 -9999 -9999 -9999 -9999 -9999 -9999 -9999 -9999 -9999 -9999 -9999 -9999 -9999 -9999 -9999
-9999 -9999 -9999 -9999 -9999 -9999 -9999 -9999 -9999 -9999 -9999 -9999 -9999 -9999 -9999 -9999 -9999 -9999 -9999 -9999 -9999 -9999 -9999 -9999 -9999 -9999 -9999 -9999 -9999 -9999 -9999 -9999 -9999 -9999 -9999 -9999 -9999 -9999 -9999 -9999 -9999 -9999 -9999 -9999 -9999 -9999 -9999 -9999 -9999 -9999 -9999 -9999 -9999 -9999 -9999 -9999 -9999 -9999 -9999 -9999 -9999 -9999 -9999 -9999 -9999 -9999 -9999 -9999 -9999 -9999 -9999 -9999 -9999 -9999 -9999 -9999 -9999 -9999 -9999 -9999 -9999 -9999 -9999 -9999 -9999 -9999 -9999 -9999 -9999 -9999 -9999 -9999 -9999 -9999 -9999 -9999 -9999 -9999 -9999 -9999 -9999 -9999 -9999 -9999 -9999 -9999 -9999 -9999 -9999 -9999 -9999 -9999 -9999 -9999 -9999 -9999 -9999 -9999 -9999 -9999 -9999 -9999 -9999 -9999 -9999 -9999 -9999 -9999 -9999 -9999 -9999 -9999 -9999 -9999 -9999 -9999 -9999 -9999 -9999 -9999 -9999 -9999 -9999 -9999 -9999 -9999 -9999 -9999 -9999 -9999 -9999 -9999 -9999 -9999 -9999 -9999 -9999 -9999 -9999 1.70161926269531 1.63043838500977 1.63152740478516 1.64849796295166 -9999 -9999 -9999 1.6390620803833 1.72501602172852 1.35674480438232 1.38202789306641 1.41640869140625 0.943612861633301 0.947448692321777 0.947336769104004 0.944989585876465 0.898264217376709 0.89774808883667 0.896716232299805 0.894325733184814 0.896098937988281 0.884601001739502 1.38373168945312 1.46264865875244 1.37231872558594 1.30222297668457 1.2652759552002 0.819046039581299 1.13704078674316 0.917090377807617 0.530929069519043 0.944251842498779 1.01198970794678 1.28554584503174 1.41822418212891 1.45751747131348 1.32096954345703 1.29020175933838 1.46051971435547 1.08252628326416 1.01657581329346 1.02449787139893 0.789157905578613 1.03532970428467 0.789665908813477 0.749610328674316 1.31780502319336 1.38402236938477 1.30537422180176 0.910318851470947 0.896315288543701 0.992367210388184 1.01053184509277 1.05435264587402 1.00492309570312 1.60478233337402 1.55666931152344 1.49826930999756 1.441311378479 1.27103096008301 -9999 -9999 -9999 -9999 -9999 -9999 -9999 -9999 -9999 -9999 -9999 0.262502918243408 0.315681495666504 0.324196186065674 0.443261833190918 0.817249031066895 1.1410489654541 1.32458187103271 1.84669258117676 1.86325424194336 1.87229473114014 1.88581157684326 1.89339351654053 1.90130516052246 1.90317832946777 1.90361206054687 1.90654586791992 1.9144303894043 1.91791980743408 1.92280746459961 1.92599945068359 1.10116939544678 1.10527759552002 1.1070964050293 1.10889266967773 1.1108540725708 1.11136447906494 1.11241630554199 1.11337886810303 1.11440002441406 1.11443950653076 1.11556755065918 1.11607074737549 1.11664215087891 1.1175732421875 1.1182356262207 1.11872051239014 1.11954986572266 1.12076557159424 1.1204615020752 1.12006004333496 1.12071407318115 1.12085975646973 1.1213684463501 1.12191867828369 1.12297702789307 1.12350322723389 1.12349716186523 1.12349704742432 1.13279880523682 1.17309677124023 1.13283782958984 1.17310935974121 1.22042278289795 1.22059787750244 1.22114799499512 1.22224010467529 1.22251899719238 1.21971897125244 1.17198635101318 1.16942184448242 1.12255954742432 1.1204761505127 1.07116436004639 1.06903427124023 1.02076011657715 1.01935466766357 1.01848560333252 1.01696605682373 1.01491619110107 1.01101238250732 1.75832061767578 1.74635513305664 1.70479774475098 1.70548084259033 1.69922733306885 1.68910388946533 1.20778003692627 0.969071273803711 0.778423118591309 0.542376823425293 0.408445072174072 1.0838907623291 0.496995964050293 0.490287551879883 0.432437582015991 0.387369117736816 0.540355796813965 1.03942462921143 0.216910772323608 0.208478322029114 0.285984649658203 0.777881755828857 0.263938264846802 0.261756763458252 0.248190879821777 -9999 -9999 -9999 -9999 -9999 -9999 -9999 -9999 -9999 -9999 -9999 -9999 -9999 -9999 -9999 -9999 -9999 -9999 -9999 -9999 -9999 -9999 -9999 -9999 -9999 -9999 -9999 -9999 -9999 -9999 -9999 -9999 -9999 -9999 -9999 -9999 -9999 -9999 -9999 -9999 -9999 -9999 -9999 -9999 -9999 -9999 -9999 -9999 -9999 -9999 -9999 -9999 -9999 -9999 -9999 -9999 -9999 0.450955839157104 0.535908107757568 0.422444715499878 0.397956047058105 0.361990156173706 0.212943434715271 0.251690454483032 0.271921834945679 1.24497711181641 0.247968063354492 0.368544473648071 0.395610151290894 0.351160326004028 0.225190329551697 0.230783886909485 0.23799768447876 0.250197858810425 0.273020868301392 0.297884159088135 0.262770967483521 0.280685033798218 0.27098536491394 0.228246560096741 0.249686794281006 0.315455961227417 0.378389053344727 0.459042720794678 0.42798903465271 0.301206922531128 0.22719470500946 0.220071401596069 0.348822784423828 1.05999298095703 -9999 -9999 -9999 -9999 -9999 -9999 -9999 -9999 -9999 -9999 -9999 -9999 -9999 -9999 -9999 -9999 -9999 -9999 -9999 -9999 -9999 -9999 -9999 -9999 -9999 -9999 -9999 -9999 -9999 -9999 -9999 -9999 -9999 -9999 -9999 -9999 -9999 -9999 -9999 -9999 -9999 -9999 -9999 -9999 -9999 -9999 -9999 -9999 -9999 -9999 -9999 -9999 -9999 -9999 -9999 -9999 -9999 -9999 -9999 -9999 -9999 -9999 0.379196033477783 0.645893726348877 0.717052001953125 -9999 -9999 -9999 -9999 -9999 -9999 -9999 -9999 -9999 -9999 -9999 -9999 -9999 -9999 -9999 -9999 -9999 -9999 -9999 -9999 -9999 -9999 -9999 -9999 -9999 -9999 -9999 -9999 -9999 -9999 -9999 -9999 1.26747459411621 1.27432891845703 1.34896373748779 -9999 -9999 -9999 -9999 -9999 -9999 -9999 -9999 -9999 -9999 -9999 -9999 -9999 -9999 -9999 -9999 -9999 -9999 -9999 -9999 -9999 -9999 -9999 -9999 -9999 -9999 -9999 0.778821258544922 0.257530517578125 0.262465581893921 0.266941652297974 0.28473629951477 0.707087459564209 0.193620343208313 0.308228130340576 0.107312507629395 0.106856489181519 0.108397192955017 0.10049473285675 0.103709177970886 0.102583765983582 0.103722302913666 0.113241727352142 0.122902264595032 0.177999315261841 -9999 -9999 -9999 -9999 -9999 -9999 -9999 -9999 -9999 -9999 -9999 -9999 -9999 -9999 -9999 -9999 -9999 -9999 -9999 -9999 -9999 -9999 -9999 -9999 -9999 -9999 -9999 -9999 -9999 -9999 -9999 -9999 -9999 -9999 -9999 -9999 -9999 -9999 -9999 -9999 -9999 -9999 -9999 -9999 -9999 -9999 -9999 -9999 -9999 -9999 -9999 -9999 -9999 -9999 -9999 -9999 -9999 -9999 -9999 -9999 -9999 -9999 -9999 -9999 -9999 -9999 -9999 -9999 -9999 -9999 -9999 -9999 -9999 -9999 -9999 -9999 -9999 -9999 -9999 -9999 -9999 -9999 -9999 -9999 -9999 -9999 -9999 -9999 -9999 -9999 -9999 -9999 -9999 -9999 -9999 -9999 -9999 -9999 -9999 -9999 -9999 -9999 -9999 -9999 -9999 -9999 -9999 -9999 -9999 -9999 -9999 -9999 -9999 -9999 -9999 -9999 -9999 -9999 -9999 -9999 -9999 -9999 -9999 -9999 -9999 -9999 -9999 -9999 -9999 -9999 -9999 -9999 -9999 -9999 -9999 -9999 -9999 -9999 -9999 -9999 -9999 -9999 -9999 -9999 -9999 -9999 -9999 -9999 -9999 -9999 -9999 -9999 -9999 -9999 -9999 -9999 -9999 -9999 -9999 -9999
-9999 -9999 -9999 -9999 -9999 -9999 -9999 -9999 -9999 -9999 -9999 -9999 -9999 -9999 -9999 -9999 -9999 -9999 -9999 -9999 -9999 -9999 -9999 -9999 -9999 -9999 -9999 -9999 -9999 -9999 -9999 -9999 -9999 -9999 -9999 -9999 -9999 -9999 -9999 -9999 -9999 -9999 -9999 -9999 -9999 -9999 -9999 -9999 -9999 -9999 -9999 -9999 -9999 -9999 -9999 -9999 -9999 -9999 -9999 -9999 -9999 -9999 -9999 -9999 -9999 -9999 -9999 -9999 -9999 -9999 -9999 -9999 -9999 -9999 -9999 -9999 -9999 -9999 -9999 -9999 -9999 -9999 -9999 -9999 -9999 -9999 -9999 -9999 -9999 -9999 -9999 -9999 -9999 -9999 -9999 -9999 -9999 -9999 -9999 -9999 -9999 -9999 -9999 -9999 -9999 -9999 -9999 -9999 -9999 -9999 -9999 -9999 -9999 -9999 -9999 -9999 -9999 -9999 -9999 -9999 -9999 -9999 -9999 -9999 -9999 -9999 -9999 -9999 -9999 -9999 -9999 -9999 -9999 -9999 -9999 -9999 -9999 -9999 -9999 -9999 -9999 -9999 -9999 -9999 -9999 -9999 -9999 -9999 1.71501285552978 1.72257545471191 1.71906372070312 1.70404872894287 1.70846111297607 1.69042179107666 1.60369766235352 -9999 -9999 -9999 -9999 -9999 -9999 -9999 -9999 -9999 -9999 -9999 -9999 -9999 1.68960445404053 1.73302436828613 1.31783546447754 1.71648193359375 1.32035179138184 1.40520252227783 1.44351367950439 1.45011497497559 1.3021976852417 1.44760276794434 1.31193088531494 1.27218704223633 1.17166259765625 0.89464485168457 1.37676624298096 1.660100440979 1.55997871398926 1.14045581817627 1.33975238800049 1.19098846435547 0.679509143829346 0.417699451446533 1.20292591094971 1.19554916381836 1.41559719085693 1.4984778213501 1.5598567199707 1.53116340637207 1.37017375946045 0.441950740814209 0.78462833404541 1.06588577270508 1.11255180358887 0.838227310180664 1.17429153442383 1.27695167541504 1.49007843017578 1.4534688949585 1.3368310546875 1.24730804443359 1.21821979522705 1.25398429870605 1.22561290740967 1.20302673339844 1.19426982879639 -9999 -9999 -9999 -9999 -9999 -9999 -9999 -9999 0.432210302352905 0.321505823135376 0.349819622039795 0.399972152709961 0.541543464660645 0.505791435241699 0.625515289306641 0.239943222999573 0.274432239532471 0.321464338302612 0.472538595199585 1.0301965713501 1.17719032287598 1.22815990447998 1.75790874481201 1.77585697174072 1.79037654876709 1.7979606628418 1.80333652496338 1.81084373474121 1.81822769165039 1.82519554138184 1.89952560424805 1.90453605651855 1.90477191925049 1.92333984375 1.92502029418945 1.09984268188477 1.10159076690674 1.10278484344482 1.10595508575439 1.10819721221924 1.10876918792725 1.11032283782959 1.1111120223999 1.11217014312744 1.11288780212402 1.11296459197998 1.11425800323486 1.11511344909668 1.11551708221436 1.1161695098877 1.11650150299072 1.11694816589355 1.11797527313232 1.1186661529541 1.1202806854248 1.12052272796631 1.12009494781494 1.1207787322998 1.1208353805542 1.12191661834717 1.12244338989258 1.1235013961792 1.12297096252441 1.1235013961792 1.12350151062012 1.1235013961792 1.12402759552002 1.12402759552002 1.12455047607422 1.13966537475586 1.17316703796387 1.1730659866333 1.17296676635742 1.17202079772949 1.17139343261719 1.16842575073242 1.17124156951904 1.12861347198486 1.13059226989746 1.06055431365967 0.978209609985352 0.979355850219726 1.0188650894165 0.969090156555176 1.01066699981689 1.01165222167969 1.00780094146729 1.75499668121338 1.73328609466553 1.70620971679687 1.69657321929932 1.70102611541748 1.35490436553955 1.13821552276611 1.11716846466064 0.761301040649414 0.570520534515381 0.39215446472168 0.304618806838989 0.265108709335327 0.238963894844055 0.203606243133545 0.202784886360168 0.19878830909729 0.209157457351685 0.394945020675659 0.990480880737305 0.221004395484924 0.195546898841858 -9999 0.264096822738647 0.205897493362427 -9999 -9999 -9999 -9999 -9999 -9999 -9999 -9999 -9999 -9999 -9999 -9999 -9999 -9999 -9999 -9999 -9999 -9999 -9999 -9999 -9999 -9999 -9999 -9999 -9999 -9999 -9999 -9999 -9999 -9999 -9999 -9999 -9999 -9999 -9999 -9999 -9999 -9999 -9999 -9999 -9999 -9999 -9999 -9999 -9999 -9999 -9999 -9999 -9999 -9999 -9999 -9999 -9999 -9999 -9999 -9999 0.222533311843872 0.415811004638672 0.720399227142334 1.71753673553467 2.20448844909668 1.96070869445801 0.45795693397522 0.972430686950684 1.44974864959717 0.357992906570435 0.217691903114319 0.383141498565674 1.0139661026001 1.23084033966064 0.990170745849609 0.388681869506836 0.252167043685913 0.318551588058472 0.297238969802856 1.12455642700195 0.963775291442871 1.17400577545166 1.2561353302002 1.27129817962646 0.245118083953857 0.240755281448364 0.237371578216553 0.274235572814941 1.57037750244141 1.4655590057373 1.0304940032959 -9999 -9999 -9999 -9999 -9999 -9999 -9999 -9999 -9999 -9999 -9999 -9999 -9999 -9999 -9999 -9999 -9999 -9999 -9999 -9999 -9999 -9999 -9999 -9999 -9999 -9999 -9999 -9999 -9999 -9999 -9999 -9999 -9999 -9999 -9999 -9999 -9999 -9999 -9999 -9999 -9999 -9999 -9999 -9999 -9999 -9999 -9999 -9999 -9999 -9999 -9999 -9999 -9999 -9999 -9999 -9999 -9999 -9999 -9999 -9999 -9999 -9999 -9999 -9999 -9999 -9999 -9999 -9999 -9999 -9999 -9999 -9999 -9999 -9999 -9999 -9999 -9999 -9999 -9999 -9999 -9999 -9999 -9999 -9999 -9999 -9999 -9999 -9999 -9999 -9999 -9999 -9999 -9999 -9999 -9999 -9999 -9999 -9999 -9999 -9999 -9999 1.22007717132568 1.22759170532227 1.08691772460937 -9999 -9999 -9999 -9999 -9999 -9999 -9999 -9999 -9999 -9999 -9999 -9999 -9999 -9999 -9999 -9999 -9999 -9999 -9999 -9999 -9999 -9999 -9999 -9999 -9999 -9999 0.804313259124756 -9999 -9999 -9999 0.734064273834228 0.639072017669678 0.697851219177246 0.180573692321777 0.108630845546722 0.111765639781952 0.109130637645721 0.127366619110107 0.174168705940247 0.136431112289429 0.131391463279724 0.149373092651367 0.145081815719604 0.210272326469421 -9999 -9999 0.286594047546387 0.404057378768921 0.380210723876953 198.871376953125 1.12321723937988 1.11640365600586 -9999 -9999 -9999 -9999 -9999 -9999 -9999 -9999 -9999 -9999 -9999 -9999 -9999 -9999 -9999 -9999 -9999 -9999 -9999 -9999 -9999 -9999 -9999 -9999 -9999 -9999 -9999 -9999 -9999 -9999 -9999 -9999 -9999 -9999 -9999 -9999 -9999 -9999 -9999 -9999 -9999 -9999 -9999 -9999 -9999 -9999 -9999 -9999 -9999 -9999 -9999 -9999 -9999 -9999 -9999 -9999 -9999 -9999 -9999 -9999 -9999 -9999 -9999 -9999 -9999 -9999 -9999 -9999 -9999 -9999 -9999 -9999 -9999 -9999 -9999 -9999 -9999 -9999 -9999 -9999 -9999 -9999 -9999 -9999 -9999 -9999 -9999 -9999 -9999 -9999 -9999 -9999 -9999 -9999 -9999 -9999 -9999 -9999 -9999 -9999 -9999 -9999 -9999 -9999 -9999 -9999 -9999 -9999 -9999 -9999 -9999 -9999 -9999 -9999 -9999 -9999 -9999 -9999 -9999 -9999 -9999 -9999 -9999 -9999 -9999 -9999 -9999 -9999 -9999 -9999 -9999 -9999 -9999 -9999 -9999 -9999 -9999 -9999 -9999 -9999 -9999 -9999 -9999 -9999 -9999 -9999 -9999 -9999 -9999 -9999 -9999 -9999
-9999 -9999 -9999 -9999 -9999 -9999 -9999 -9999 -9999 -9999 -9999 -9999 -9999 -9999 -9999 -9999 -9999 -9999 -9999 -9999 -9999 -9999 -9999 -9999 -9999 -9999 -9999 -9999 -9999 -9999 -9999 -9999 -9999 -9999 -9999 -9999 -9999 -9999 -9999 -9999 -9999 -9999 -9999 -9999 -9999 -9999 -9999 -9999 -9999 -9999 -9999 -9999 -9999 -9999 -9999 -9999 -9999 -9999 -9999 -9999 -9999 -9999 -9999 -9999 -9999 -9999 -9999 -9999 -9999 -9999 -9999 -9999 -9999 -9999 -9999 -9999 -9999 -9999 -9999 -9999 -9999 -9999 -9999 -9999 -9999 -9999 -9999 -9999 -9999 -9999 -9999 -9999 -9999 -9999 -9999 -9999 -9999 -9999 -9999 -9999 -9999 -9999 -9999 -9999 -9999 -9999 -9999 -9999 -9999 -9999 -9999 -9999 -9999 -9999 -9999 -9999 -9999 -9999 -9999 -9999 -9999 -9999 -9999 -9999 -9999 -9999 -9999 -9999 -9999 -9999 -9999 -9999 -9999 -9999 -9999 -9999 0.947572574615479 0.965921745300293 1.04697326660156 0.966201095581055 0.943873558044434 -9999 -9999 -9999 -9999 -9999 -9999 -9999 -9999 -9999 1.66410232543945 1.63962158203125 1.66955303192139 1.65092113494873 1.57966346740723 1.62719089508057 1.59829387664795 1.57135562896729 1.58745586395264 1.57007446289062 1.57999294281006 -9999 -9999 1.54734603881836 1.550852394104 1.559560546875 1.54418174743652 1.60753772735596 -9999 -9999 -9999 1.59724628448486 1.46506713867187 1.49787094116211 1.64310550689697 1.32458759307861 1.57338134765625 0.946356811523437 0.946715469360352 1.42021305084228 1.26317687988281 1.16963871002197 1.72089328765869 1.59040740966797 1.53669914245605 1.53118549346924 1.42919231414795 1.4592448425293 1.44320514678955 1.59175060272217 1.45209285736084 1.41408657073975 1.42373382568359 1.39605365753174 1.42100028991699 1.57290596008301 1.54765045166016 0.689039440155029 0.946979427337646 0.952094306945801 0.952823753356934 0.952608089447021 0.948707885742187 1.22797657012939 1.22509632110596 1.20233013153076 1.14423580169678 1.04362827301025 0.544899673461914 0.280899066925049 0.229230422973633 -9999 -9999 -9999 -9999 0.355809030532837 0.612348003387451 0.593553199768066 0.446613636016846 1.04343509674072 1.26100547790527 1.31455604553223 1.36463985443115 1.37561977386475 1.47437072753906 1.52517505645752 1.03714050292969 1.05845867156982 1.19410228729248 1.65199779510498 1.67656951904297 1.68768848419189 1.70233348846436 1.71321750640869 1.71811191558838 1.7240612411499 1.7271985244751 1.7342654800415 1.81224700927734 1.81214332580566 1.81944671630859 1.74374187469482 1.74799495697021 1.82750495910645 1.83701168060303 1.04839141845703 1.05024799346924 1.0506941986084 1.05242820739746 1.05390632629395 1.05608413696289 1.05685020446777 1.05831516265869 1.05840019226074 1.05997283935547 1.06059677124023 1.10903926849365 1.11099071502686 1.1110973739624 1.11314609527588 1.11421348571777 1.11534748077393 1.11575466156006 1.11615005493164 1.11673107147217 1.11694450378418 1.11773265838623 1.11788818359375 1.11941928863525 1.12008121490479 1.12070823669434 1.12083034515381 1.12136489868164 1.12296764373779 1.12297382354736 1.1235013961792 1.1235013961792 1.12350151062012 1.12402542114258 1.12402542114258 1.12402542114258 1.12402542114258 1.1299047088623 1.1240242767334 1.1240242767334 1.17059200286865 1.17142959594727 1.12382411956787 1.12318748474121 1.12191089630127 1.12158050537109 1.12131488800049 1.12042636871338 1.11993186950684 1.1073168182373 0.933544006347656 0.920667514801025 0.918553676605225 0.870942821502686 0.862704563140869 1.49801113128662 1.52134586334229 1.5669522857666 1.48712665557861 1.47197444915771 1.52692279815674 1.52109329223633 1.43798824310303 1.33125949859619 1.09177265167236 0.977376136779785 0.926713199615478 0.588395004272461 0.314898662567139 0.209953622817993 0.197027349472046 0.162691311836243 0.158616585731506 0.167499489784241 0.158750882148743 0.156126394271851 0.192986326217651 0.190864419937134 0.194361033439636 -9999 -9999 -9999 -9999 -9999 -9999 -9999 -9999 -9999 -9999 -9999 -9999 -9999 -9999 -9999 -9999 -9999 -9999 -9999 -9999 -9999 -9999 -9999 -9999 -9999 -9999 -9999 -9999 -9999 -9999 -9999 -9999 -9999 -9999 -9999 -9999 -9999 -9999 -9999 -9999 -9999 -9999 -9999 -9999 -9999 -9999 -9999 -9999 -9999 -9999 -9999 -9999 -9999 -9999 -9999 -9999 -9999 0.492055606842041 0.473522815704346 0.300561876296997 0.882772808074951 1.1074333190918 2.09077308654785 2.19525512695312 0.323520612716675 1.10505432128906 0.208943438529968 0.226982088088989 0.300606050491333 0.370863590240478 0.986567001342773 0.996039276123047 1.30494346618652 0.49780403137207 0.28724404335022 0.251691570281982 0.225171275138855 0.230976877212524 0.236542625427246 1.26810882568359 -9999 -9999 -9999 -9999 -9999 -9999 -9999 -9999 -9999 0.543233070373535 -9999 -9999 -9999 -9999 -9999 -9999 -9999 -9999 -9999 -9999 -9999 -9999 -9999 -9999 -9999 -9999 -9999 -9999 -9999 -9999 -9999 -9999 -9999 -9999 -9999 -9999 -9999 -9999 -9999 -9999 -9999 -9999 -9999 -9999 -9999 -9999 -9999 -9999 -9999 -9999 -9999 -9999 -9999 -9999 -9999 -9999 -9999 -9999 -9999 -9999 -9999 -9999 -9999 -9999 -9999 -9999 -9999 -9999 -9999 -9999 -9999 -9999 -9999 -9999 -9999 -9999 -9999 -9999 -9999 -9999 -9999 -9999 -9999 -9999 -9999 -9999 -9999 -9999 -9999 -9999 -9999 -9999 -9999 -9999 -9999 -9999 -9999 -9999 -9999 -9999 -9999 -9999 -9999 -9999 -9999 -9999 -9999 -9999 -9999 -9999 -9999 -9999 -9999 -9999 -9999 -9999 -9999 -9999 -9999 -9999 -9999 -9999 -9999 -9999 -9999 -9999 -9999 -9999 -9999 -9999 -9999 -9999 -9999 -9999 -9999 -9999 -9999 -9999 -9999 -9999 -9999 -9999 -9999 -9999 -9999 -9999 -9999 0.929916229248047 0.855904083251953 0.820315189361572 0.67740406036377 133.231743164062 0.524062557220459 0.212825174331665 0.221263647079468 0.395829019546509 0.969411964416504 10.3565112304687 0.202403340339661 0.194417881965637 0.178155212402344 0.187152299880981 0.182487087249756 0.313059911727905 0.210091738700867 0.324502687454224 0.790683917999268 -9999 -9999 -9999 -9999 -9999 -9999 -9999 -9999 -9999 -9999 -9999 -9999 -9999 -9999 -9999 -9999 -9999 -9999 -9999 -9999 -9999 -9999 -9999 -9999 -9999 -9999 -9999 -9999 -9999 -9999 -9999 -9999 -9999 -9999 -9999 -9999 -9999 -9999 -9999 -9999 -9999 -9999 -9999 -9999 -9999 -9999 -9999 -9999 -9999 -9999 -9999 -9999 -9999 -9999 -9999 -9999 -9999 -9999 -9999 -9999 -9999 -9999 -9999 -9999 -9999 -9999 -9999 -9999 -9999 -9999 -9999 -9999 -9999 -9999 -9999 -9999 -9999 -9999 -9999 -9999 -9999 -9999 -9999 -9999 -9999 -9999 -9999 -9999 -9999 -9999 -9999 -9999 -9999 -9999 -9999 -9999 -9999 -9999 -9999 -9999 -9999 -9999 -9999 -9999 -9999 -9999 -9999 -9999 -9999 -9999 -9999 -9999 -9999 -9999 -9999 -9999 -9999 -9999 -9999 -9999 -9999 -9999 -9999 -9999 -9999 -9999 -9999 -9999 -9999 -9999 -9999 -9999 -9999 -9999 -9999 -9999 -9999 -9999 -9999 -9999 -9999 -9999 -9999 -9999 -9999 -9999 -9999 -9999 -9999
-9999 -9999 -9999 -9999 -9999 -9999 -9999 -9999 -9999 -9999 -9999 -9999 -9999 -9999 -9999 -9999 -9999 -9999 -9999 -9999 -9999 -9999 -9999 -9999 -9999 -9999 -9999 -9999 -9999 -9999 -9999 -9999 -9999 -9999 -9999 -9999 -9999 -9999 -9999 -9999 -9999 -9999 -9999 -9999 -9999 -9999 -9999 -9999 -9999 -9999 -9999 -9999 -9999 -9999 -9999 -9999 -9999 -9999 -9999 -9999 -9999 -9999 -9999 -9999 -9999 -9999 -9999 -9999 -9999 -9999 -9999 -9999 -9999 -9999 -9999 -9999 -9999 -9999 -9999 -9999 -9999 -9999 -9999 -9999 -9999 -9999 -9999 -9999 -9999 -9999 -9999 -9999 -9999 -9999 -9999 -9999 -9999 -9999 -9999 -9999 -9999 -9999 -9999 -9999 -9999 -9999 -9999 -9999 -9999 -9999 -9999 -9999 -9999 -9999 -9999 -9999 -9999 -9999 -9999 -9999 -9999 -9999 -9999 -9999 -9999 -9999 -9999 -9999 -9999 -9999 -9999 -9999 -9999 0.930123996734619 0.929741191864014 0.92893913269043 0.945628852844238 0.947793445587158 0.978010711669922 0.966733360290527 0.925038642883301 -9999 -9999 -9999 -9999 -9999 -9999 -9999 -9999 -9999 1.54188056945801 1.52279239654541 1.56234214782715 1.52646595001221 1.51900291442871 1.55728019714355 1.52786991119385 1.52785022735596 1.56166236877441 1.56135383605957 1.56296848297119 1.51686458587646 -9999 1.52076839447021 1.51729488372803 1.53754554748535 1.57022495269775 1.58292102813721 1.51812126159668 1.45736560821533 -9999 -9999 -9999 -9999 1.52593231201172 1.54672222137451 1.53385986328125 1.55457389831543 1.55677963256836 1.39736663818359 1.68175792694092 1.66466640472412 1.48558261871338 1.31240787506104 -9999 1.43481662750244 1.11719352722168 1.54110511779785 1.57194213867188 1.7264444732666 1.61598964691162 1.65870677947998 1.76304714202881 1.68777946472168 1.69804161071777 1.71597312927246 1.7449893951416 1.22391918182373 1.10432498931885 1.10712055206299 1.06181373596191 1.05892330169678 1.05238586425781 1.84117343902588 1.33960189819336 1.31318744659424 1.16409633636475 1.22183074951172 0.389524955749512 1.31674827575684 -9999 -9999 -9999 -9999 0.307348194122314 1.37559196472168 1.07298454284668 1.12995872497559 1.13389949798584 1.10741329193115 1.10848663330078 1.11991836547852 1.63197772979736 1.64061195373535 1.65525157928467 1.67048469543457 1.69277801513672 1.69884384155273 1.70944313049316 1.71418830871582 1.72025024414062 1.72400779724121 1.73072639465332 1.73476341247559 1.74215229034424 1.74450199127197 1.74516918182373 1.74745845794678 1.74791702270508 1.74804256439209 1.74703731536865 0.994789581298828 0.996773071289062 0.998421592712402 0.99921443939209 0.99970516204834 1.00039981842041 1.00096687316895 1.00165798187256 1.00324115753174 1.00378028869629 1.00651679992676 1.0540588760376 1.05581897735596 1.0551969909668 1.05690868377686 1.05776515960693 1.05831745147705 1.05981616973877 1.06086742401123 1.06125080108643 1.06175491333008 1.06210750579834 1.06400459289551 1.10901466369629 1.11005870819092 1.10942470550537 1.11629596710205 1.11725521087646 1.11823150634766 1.11940921783447 1.12005260467529 1.12120525360107 1.121813621521 1.12278087615967 1.12296592712402 1.12350082397461 1.12296649932861 1.12349052429199 1.12349052429199 1.12296306610107 1.122428855896 1.122428855896 1.122428855896 1.1229517364502 1.12294864654541 1.12178363800049 1.12164710998535 1.12123146057129 1.12089752197266 1.12074840545654 1.07149669647217 1.06980091094971 1.06767116546631 1.01964923858643 1.01634532928467 0.917665729522705 0.915957126617432 0.911394882202148 1.58401599884033 1.49617881774902 1.40613201141357 1.39918464660645 1.39105316162109 1.37245834350586 1.27903244018555 1.25573467254639 1.10010578155518 0.782445087432861 0.693588752746582 0.712580165863037 0.560268173217773 0.270453014373779 0.190989060401916 0.150286974906921 0.139350357055664 0.127133674621582 0.136293125152588 0.123465857505798 0.12397481918335 0.12543062210083 0.16445604801178 -9999 -9999 -9999 -9999 -9999 -9999 -9999 -9999 -9999 -9999 -9999 -9999 -9999 -9999 -9999 -9999 -9999 -9999 -9999 -9999 -9999 -9999 -9999 -9999 -9999 -9999 -9999 -9999 -9999 -9999 -9999 -9999 -9999 -9999 -9999 -9999 -9999 -9999 -9999 -9999 -9999 -9999 -9999 -9999 -9999 -9999 -9999 -9999 -9999 -9999 -9999 -9999 -9999 -9999 -9999 -9999 -9999 -9999 -9999 -9999 0.398260345458984 0.286191902160644 0.180929703712463 0.64689525604248 0.463119678497314 0.957235565185547 0.231723647117615 0.910710582733154 0.334348297119141 0.333537883758545 0.504254207611084 0.34628005027771 0.73333345413208 0.352825956344604 0.508692283630371 0.357781934738159 0.264690570831299 -9999 0.248622751235962 2.32038597106934 0.233202681541443 0.232491946220398 0.284537115097046 0.299683170318604 0.700304946899414 -9999 -9999 -9999 -9999 -9999 -9999 -9999 -9999 -9999 -9999 -9999 -9999 -9999 -9999 -9999 -9999 -9999 -9999 -9999 -9999 -9999 -9999 -9999 -9999 -9999 -9999 -9999 -9999 -9999 -9999 -9999 -9999 -9999 -9999 -9999 -9999 -9999 -9999 -9999 -9999 -9999 -9999 -9999 -9999 -9999 -9999 -9999 -9999 -9999 -9999 -9999 -9999 -9999 -9999 -9999 -9999 -9999 -9999 -9999 -9999 -9999 -9999 -9999 -9999 -9999 -9999 -9999 -9999 -9999 -9999 -9999 -9999 -9999 -9999 -9999 -9999 -9999 -9999 -9999 -9999 -9999 -9999 -9999 -9999 -9999 -9999 -9999 -9999 -9999 -9999 -9999 -9999 -9999 -9999 -9999 -9999 -9999 -9999 -9999 -9999 -9999 -9999 -9999 -9999 -9999 -9999 -9999 -9999 -9999 -9999 -9999 -9999 -9999 -9999 -9999 -9999 -9999 -9999 -9999 -9999 -9999 -9999 -9999 -9999 -9999 -9999 -9999 -9999 -9999 -9999 -9999 -9999 -9999 -9999 -9999 -9999 -9999 -9999 -9999 -9999 -9999 -9999 -9999 -9999 -9999 -9999 -9999 -9999 -9999 -9999 -9999 -9999 296.859228515625 281.736005859375 233.297841796875 0.936853523254395 0.762427825927734 0.584773578643799 0.379726409912109 1.08813514709473 1.69925720214844 4.31223403930664 0.921215858459473 0.660452499389648 -9999 1.08624011993408 1.05450450897217 1.02715621948242 0.913660697937012 -9999 -9999 -9999 -9999 -9999 -9999 -9999 -9999 -9999 -9999 -9999 -9999 -9999 -9999 -9999 -9999 -9999 -9999 -9999 -9999 -9999 -9999 -9999 -9999 -9999 -9999 -9999 -9999 -9999 -9999 -9999 -9999 -9999 -9999 -9999 -9999 -9999 -9999 -9999 -9999 -9999 -9999 -9999 -9999 -9999 -9999 -9999 -9999 -9999 -9999 -9999 -9999 -9999 -9999 -9999 -9999 -9999 -9999 -9999 -9999 -9999 -9999 -9999 -9999 -9999 -9999 -9999 -9999 -9999 -9999 -9999 -9999 -9999 -9999 -9999 -9999 -9999 -9999 -9999 -9999 -9999 -9999 -9999 -9999 -9999 -9999 -9999 -9999 -9999 -9999 -9999 -9999 -9999 -9999 -9999 -9999 -9999 -9999 -9999 -9999 -9999 -9999 -9999 -9999 -9999 -9999 -9999 -9999 -9999 -9999 -9999 -9999 -9999 -9999 -9999 -9999 -9999 -9999 -9999 -9999 -9999 -9999 -9999 -9999 -9999 -9999 -9999 -9999 -9999 -9999 -9999 -9999 -9999 -9999 -9999 -9999 -9999 -9999 -9999 -9999 -9999 -9999 -9999 -9999
-9999 -9999 -9999 -9999 -9999 -9999 -9999 -9999 -9999 -9999 -9999 -9999 -9999 -9999 -9999 -9999 -9999 -9999 -9999 -9999 -9999 -9999 -9999 -9999 -9999 -9999 -9999 -9999 -9999 -9999 -9999 -9999 -9999 -9999 -9999 -9999 -9999 -9999 -9999 -9999 -9999 -9999 -9999 -9999 -9999 -9999 -9999 -9999 -9999 -9999 -9999 -9999 -9999 -9999 -9999 -9999 -9999 -9999 -9999 -9999 -9999 -9999 -9999 -9999 -9999 -9999 -9999 -9999 -9999 -9999 -9999 -9999 -9999 -9999 -9999 -9999 -9999 -9999 -9999 -9999 -9999 -9999 -9999 -9999 -9999 -9999 -9999 -9999 -9999 -9999 -9999 -9999 -9999 -9999 -9999 -9999 -9999 -9999 -9999 -9999 -9999 -9999 -9999 -9999 -9999 -9999 -9999 -9999 -9999 -9999 -9999 -9999 -9999 -9999 -9999 -9999 -9999 -9999 -9999 -9999 -9999 -9999 -9999 -9999 -9999 -9999 -9999 -9999 -9999 -9999 0.92467981338501 0.951588134765625 0.910895175933838 0.923531112670898 0.951847229003906 0.961067047119141 0.926344299316406 0.920538825988769 0.923525447845459 0.910334129333496 0.903876171112061 -9999 -9999 -9999 -9999 -9999 -9999 -9999 0.883660926818848 1.01256683349609 -9999 -9999 -9999 -9999 -9999 1.52769081115723 1.47813949584961 1.49357654571533 1.50775989532471 1.50182270050049 1.47384269714355 1.50386375427246 -9999 -9999 -9999 1.47445713043213 1.53420032501221 1.48878559112549 1.533046875 1.58007751464844 1.6835786819458 1.73315654754639 1.67168025970459 1.77749771118164 -9999 -9999 -9999 1.85938430786133 1.91086715698242 1.94536422729492 -9999 -9999 -9999 0.43657919883728 0.463425979614258 0.69337423324585 0.50280086517334 0.451333465576172 0.608193626403809 0.502973098754883 1.205104637146 1.72977436065674 1.6514342880249 0.72550500869751 0.877901916503906 1.71145328521729 1.79598976135254 1.33183731079102 1.15756530761719 1.46543037414551 1.40831199645996 1.27896251678467 0.360586280822754 0.254873285293579 0.329057779312134 0.42231107711792 0.28089451789856 0.371659498214722 -9999 -9999 -9999 -9999 -9999 -9999 -9999 0.273908128738403 0.24616081237793 0.213418736457825 0.27630895614624 0.230736136436462 0.23499725818634 0.303221597671509 0.699122657775879 1.02505725860596 1.04805164337158 0.905934677124023 1.04701286315918 1.09168647766113 1.07540256500244 1.15168704986572 1.61780708312988 1.66525417327881 1.70513214111328 1.71237247467041 1.7263272857666 1.73168037414551 1.7403458404541 1.74494922637939 1.74726619720459 1.74710231781006 1.74508186340332 1.74669696807861 0.994585189819336 0.995387420654297 0.997244911193848 0.997064895629883 0.99748649597168 1.00069736480713 1.0422904586792 1.04473560333252 1.00298252105713 1.0467798614502 1.05303073883057 1.05363716125488 1.05557281494141 1.05657909393311 1.05731369018555 1.05908843994141 1.06115020751953 1.06102180480957 1.06133903503418 1.06175617218018 1.06221279144287 1.06263999938965 1.06296054840088 1.06296112060547 1.06271965026855 1.06346866607666 1.0643522644043 1.06450000762939 1.0647331237793 1.06688632965088 1.06894271850586 1.11917003631592 1.11962162017822 1.11914394378662 1.11915836334229 1.11945156097412 1.11977737426758 1.11978012084961 1.11977760314941 1.12030414581299 1.12030414581299 1.12030414581299 1.11976650238037 1.11911556243896 1.12005226135254 1.11987979888916 1.11999286651611 1.11967437744141 1.07068496704102 1.069870262146 1.0688818359375 1.06756690979004 1.06668594360352 1.06489597320557 1.06328601837158 1.05577102661133 0.909885120391846 1.58367897033691 1.48743072509766 1.31465400695801 1.2232852935791 1.13240970611572 1.06074462890625 1.02865196228027 1.00707080841064 0.926949863433838 0.608469486236572 0.37924859046936 0.197376809120178 0.139067258834839 0.121600828170776 0.0956061887741089 0.0920059704780579 0.100117263793945 0.0992419338226318 0.0863214111328125 0.12495822429657 0.0974361276626587 0.133477063179016 0.129167675971985 -9999 0.0557082688808441 0.0573664748668671 -9999 -9999 -9999 -9999 -9999 -9999 -9999 -9999 -9999 -9999 -9999 -9999 -9999 -9999 -9999 -9999 -9999 -9999 -9999 -9999 -9999 -9999 -9999 -9999 -9999 -9999 -9999 -9999 -9999 -9999 -9999 -9999 -9999 -9999 -9999 -9999 -9999 -9999 -9999 -9999 -9999 -9999 -9999 -9999 -9999 -9999 -9999 -9999 -9999 -9999 -9999 -9999 -9999 -9999 -9999 -9999 -9999 -9999 -9999 -9999 -9999 -9999 0.15582667350769 0.185261564254761 0.199262652397156 0.260910987854004 0.243576021194458 0.254929876327515 0.27931809425354 0.244102020263672 0.233032464981079 0.360230512619019 -9999 -9999 -9999 -9999 -9999 14.7617404174805 0.276078729629517 0.237423806190491 0.240742492675781 0.25362024307251 0.847486896514893 1.06314056396484 0.321044311523437 -9999 -9999 -9999 -9999 -9999 -9999 -9999 -9999 -9999 -9999 -9999 -9999 -9999 -9999 -9999 -9999 -9999 -9999 -9999 -9999 -9999 -9999 -9999 -9999 -9999 -9999 -9999 -9999 -9999 -9999 -9999 -9999 -9999 -9999 -9999 -9999 -9999 -9999 -9999 -9999 -9999 -9999 -9999 -9999 -9999 -9999 -9999 -9999 -9999 -9999 -9999 -9999 -9999 -9999 -9999 -9999 -9999 -9999 -9999 -9999 -9999 -9999 -9999 -9999 -9999 -9999 -9999 -9999 -9999 -9999 -9999 -9999 -9999 -9999 -9999 -9999 -9999 -9999 -9999 -9999 -9999 -9999 -9999 -9999 -9999 -9999 -9999 -9999 -9999 -9999 -9999 -9999 -9999 -9999 -9999 -9999 -9999 -9999 -9999 -9999 -9999 -9999 -9999 -9999 -9999 -9999 -9999 -9999 -9999 -9999 -9999 -9999 -9999 -9999 0.677696514129639 -9999 -9999 -9999 -9999 -9999 -9999 -9999 -9999 -9999 -9999 -9999 -9999 -9999 -9999 -9999 -9999 -9999 -9999 -9999 -9999 -9999 -9999 -9999 -9999 -9999 -9999 -9999 -9999 -9999 -9999 -9999 -9999 -9999 0.277706594467163 0.270503826141357 0.340507249832153 -9999 -9999 -9999 -9999 -9999 1.247307472229 1.25820510864258 392.0173828125 1.28959785461426 -9999 -9999 -9999 -9999 -9999 -9999 -9999 -9999 -9999 -9999 -9999 -9999 -9999 -9999 -9999 -9999 -9999 -9999 -9999 -9999 -9999 -9999 -9999 -9999 -9999 -9999 -9999 -9999 -9999 -9999 -9999 -9999 -9999 -9999 -9999 -9999 -9999 -9999 -9999 -9999 -9999 -9999 -9999 -9999 -9999 -9999 -9999 -9999 -9999 -9999 -9999 -9999 -9999 -9999 -9999 -9999 -9999 -9999 -9999 -9999 -9999 -9999 -9999 -9999 -9999 -9999 -9999 -9999 -9999 -9999 -9999 -9999 -9999 -9999 -9999 -9999 -9999 -9999 -9999 -9999 -9999 -9999 -9999 -9999 -9999 -9999 -9999 -9999 -9999 -9999 -9999 -9999 -9999 -9999 -9999 -9999 -9999 -9999 -9999 -9999 -9999 -9999 -9999 -9999 -9999 -9999 -9999 -9999 -9999 -9999 -9999 -9999 -9999 -9999 -9999 -9999 -9999 -9999 -9999 -9999 -9999 -9999 -9999 -9999 -9999 -9999 -9999 -9999 -9999 -9999 -9999 -9999 -9999 -9999 -9999 -9999 -9999 -9999 -9999 -9999 -9999 -9999 -9999 -9999 -9999 -9999 -9999 -9999 -9999 -9999
-9999 -9999 -9999 -9999 -9999 -9999 -9999 -9999 -9999 -9999 -9999 -9999 -9999 -9999 -9999 -9999 -9999 -9999 -9999 -9999 -9999 -9999 -9999 -9999 -9999 -9999 -9999 -9999 -9999 -9999 -9999 -9999 -9999 -9999 -9999 -9999 -9999 -9999 -9999 -9999 -9999 -9999 -9999 -9999 -9999 -9999 -9999 -9999 -9999 -9999 -9999 -9999 -9999 -9999 -9999 -9999 -9999 -9999 -9999 -9999 -9999 -9999 -9999 -9999 -9999 -9999 -9999 -9999 -9999 -9999 -9999 -9999 -9999 -9999 -9999 -9999 -9999 -9999 -9999 -9999 -9999 -9999 -9999 -9999 -9999 -9999 -9999 -9999 -9999 -9999 -9999 -9999 -9999 -9999 -9999 -9999 -9999 -9999 -9999 -9999 -9999 -9999 -9999 -9999 -9999 -9999 -9999 -9999 -9999 -9999 -9999 -9999 -9999 -9999 -9999 -9999 -9999 -9999 -9999 -9999 0.90449535369873 0.910835266113281 0.957844848632812 0.889622383117676 0.890348796844482 0.890810394287109 0.900769386291504 0.905608463287353 0.872577323913574 -9999 -9999 -9999 -9999 -9999 0.900879535675049 0.914318389892578 0.885791187286377 0.879516563415527 0.883676719665527 0.868428382873535 -9999 -9999 -9999 -9999 -9999 -9999 -9999 0.834084377288818 0.78030086517334 0.75687520980835 0.897347545623779 -9999 -9999 -9999 -9999 -9999 -9999 -9999 -9999 -9999 -9999 -9999 -9999 -9999 -9999 -9999 -9999 1.70755210876465 1.6420491027832 1.63795623779297 1.74421165466309 1.81311195373535 1.8510498046875 -9999 -9999 -9999 -9999 1.79691158294678 1.62970676422119 1.753190574646 1.68833038330078 -9999 -9999 0.390588340759277 0.433464288711548 0.527003974914551 1.31124286651611 1.72213703155518 0.737387065887451 1.41384761810303 1.66726638793945 1.14824317932129 1.68923664093018 1.6778938293457 1.66880149841309 1.53586601257324 0.8566282081604 1.71957378387451 0.61320556640625 0.614218196868896 0.66000846862793 0.501730728149414 0.332204103469849 0.252769088745117 -9999 -9999 -9999 -9999 -9999 -9999 -9999 -9999 -9999 -9999 -9999 0.18418833732605 0.189781665802002 0.183332977294922 0.231473894119263 0.247545204162598 0.214816761016846 0.278335075378418 0.300049495697021 0.443556518554687 0.295808458328247 1.20368671417236 0.868997211456299 1.02693294525146 1.26591293334961 0.688626136779785 1.12473712921143 1.63557952880859 1.68409858703613 1.70274982452393 1.70631465911865 1.71775703430176 1.73094188690186 1.73414726257324 1.73632850646973 1.7359232711792 1.73392433166504 1.73534145355225 1.73963607788086 1.74403347015381 1.74875770568848 1.75102294921875 1.82501312255859 1.83427665710449 1.83455978393555 1.83645034790039 1.0477071762085 1.04967739105225 1.0508572769165 1.05277038574219 1.05263248443604 1.05365970611572 1.09213897705078 1.10555351257324 1.10902931213379 1.10942527770996 1.11109382629395 1.11235256195068 1.11392795562744 1.11540767669678 1.11663722991943 1.11653606414795 1.11802562713623 1.11985095977783 1.12044227600098 1.12121520996094 1.1214627456665 1.17058227539062 1.12294876098633 1.13054363250732 1.1227116394043 1.1222257232666 1.12170101165771 1.12011280059814 1.11966293334961 1.11981456756592 1.1203010559082 1.12030391693115 1.12030242919922 1.12016635894775 1.11962265014648 1.11945167541504 1.11910045623779 1.11994319915771 1.11953945159912 1.11913913726807 1.07102359771729 1.11724800109863 1.11563919067383 1.11430240631104 1.1130143737793 1.10512756347656 1.06248584747314 1.06048839569092 1.05831104278564 1.67460914611816 1.57882312774658 1.14613254547119 1.13780937194824 1.04996875762939 0.960595092773437 0.952793312072754 0.872999153137207 0.850297336578369 0.678080406188965 0.46023021697998 0.1600581407547 0.121091809272766 0.0957299566268921 0.174824166297913 0.146311383247375 0.10527717590332 0.071612012386322 0.0733409786224365 0.0901731419563293 0.0581066644191742 0.0735695672035217 0.0803968334197998 0.0738574004173279 0.0665194845199585 -9999 -9999 -9999 -9999 -9999 -9999 -9999 -9999 -9999 -9999 -9999 -9999 -9999 -9999 -9999 -9999 -9999 -9999 -9999 -9999 -9999 -9999 -9999 -9999 -9999 -9999 -9999 -9999 -9999 -9999 -9999 -9999 -9999 -9999 -9999 -9999 -9999 -9999 -9999 -9999 -9999 -9999 -9999 -9999 -9999 -9999 -9999 -9999 -9999 -9999 -9999 -9999 -9999 -9999 -9999 -9999 -9999 -9999 -9999 -9999 -9999 -9999 -9999 -9999 0.19666624546051 0.169243183135986 0.236372594833374 0.334027690887451 0.273481922149658 0.248310642242432 0.245210237503052 0.235660243034363 0.162558989524841 -9999 -9999 -9999 -9999 -9999 0.267489452362061 0.766607265472412 0.517955589294434 1.41000411987305 0.920525894165039 0.684492416381836 -9999 -9999 -9999 -9999 -9999 -9999 -9999 -9999 -9999 -9999 -9999 -9999 -9999 -9999 -9999 -9999 -9999 -9999 -9999 -9999 -9999 -9999 -9999 -9999 -9999 -9999 -9999 -9999 -9999 -9999 -9999 -9999 -9999 -9999 -9999 -9999 -9999 -9999 -9999 -9999 -9999 -9999 -9999 -9999 -9999 -9999 -9999 -9999 -9999 -9999 -9999 -9999 -9999 -9999 -9999 -9999 -9999 -9999 -9999 -9999 -9999 -9999 -9999 -9999 -9999 -9999 -9999 -9999 -9999 -9999 -9999 -9999 -9999 -9999 -9999 -9999 -9999 -9999 -9999 -9999 -9999 -9999 -9999 -9999 -9999 -9999 -9999 -9999 -9999 0.505127105712891 -9999 -9999 -9999 -9999 -9999 -9999 -9999 -9999 -9999 -9999 -9999 -9999 -9999 -9999 -9999 -9999 -9999 -9999 -9999 -9999 -9999 -9999 -9999 -9999 -9999 -9999 0.822447853088379 -9999 -9999 -9999 -9999 -9999 -9999 -9999 -9999 -9999 -9999 -9999 -9999 -9999 0.169737396240234 0.166681938171387 -9999 -9999 -9999 -9999 -9999 -9999 -9999 -9999 -9999 -9999 -9999 0.180341935157776 0.182179427146912 -9999 -9999 -9999 -9999 -9999 -9999 -9999 -9999 -9999 0.243244171142578 400.4546484375 401.0951953125 389.044365234375 368.073310546875 344.804912109375 392.321337890625 400.902890625 412.969072265625 414.73166015625 -9999 -9999 -9999 -9999 -9999 -9999 -9999 -9999 -9999 -9999 -9999 -9999 -9999 -9999 -9999 -9999 -9999 -9999 -9999 -9999 -9999 -9999 -9999 -9999 -9999 -9999 -9999 -9999 -9999 -9999 -9999 -9999 -9999 -9999 -9999 -9999 -9999 -9999 -9999 -9999 -9999 -9999 -9999 -9999 -9999 -9999 -9999 -9999 -9999 -9999 -9999 -9999 -9999 -9999 -9999 -9999 -9999 -9999 -9999 -9999 -9999 -9999 -9999 -9999 -9999 -9999 -9999 -9999 -9999 -9999 -9999 -9999 -9999 -9999 -9999 -9999 -9999 -9999 -9999 -9999 -9999 -9999 -9999 -9999 -9999 -9999 -9999 -9999 -9999 -9999 -9999 -9999 -9999 -9999 -9999 -9999 -9999 -9999 -9999 -9999 -9999 -9999 -9999 -9999 -9999 -9999 -9999 -9999 -9999 -9999 -9999 -9999 -9999 -9999 -9999 -9999 -9999 -9999 -9999 -9999 -9999 -9999 -9999 -9999 -9999 -9999 -9999 -9999 -9999 -9999 -9999 -9999 -9999 -9999 -9999 -9999 -9999 -9999 -9999 -9999 -9999 -9999 -9999 -9999 -9999 -9999 -9999 -9999
-9999 -9999 -9999 -9999 -9999 -9999 -9999 -9999 -9999 -9999 -9999 -9999 -9999 -9999 -9999 -9999 -9999 -9999 -9999 -9999 -9999 -9999 -9999 -9999 -9999 -9999 -9999 -9999 -9999 -9999 -9999 -9999 -9999 -9999 -9999 -9999 -9999 -9999 -9999 -9999 -9999 -9999 -9999 -9999 -9999 -9999 -9999 -9999 -9999 -9999 -9999 -9999 -9999 -9999 -9999 -9999 -9999 -9999 -9999 -9999 -9999 -9999 -9999 -9999 -9999 -9999 -9999 -9999 -9999 -9999 -9999 -9999 -9999 -9999 -9999 -9999 -9999 -9999 -9999 -9999 -9999 -9999 -9999 -9999 -9999 -9999 -9999 -9999 -9999 -9999 -9999 -9999 -9999 -9999 -9999 -9999 -9999 -9999 -9999 -9999 -9999 -9999 -9999 -9999 -9999 -9999 -9999 -9999 -9999 -9999 -9999 -9999 -9999 -9999 -9999 -9999 -9999 0.891258029937744 0.913722267150879 0.938241863250732 0.893658485412598 0.898784236907959 0.908902759552002 0.916072826385498 0.931049365997314 0.850627670288086 0.854965667724609 0.786941928863525 -9999 -9999 0.857396450042725 0.840548400878906 0.643618469238281 -9999 -9999 -9999 -9999 -9999 -9999 -9999 0.543914737701416 0.530298271179199 0.528870906829834 -9999 -9999 -9999 -9999 -9999 -9999 -9999 0.46029559135437 0.579565773010254 -9999 -9999 -9999 -9999 0.989923210144043 1.06612392425537 1.20905330657959 1.23247856140137 1.3728923034668 -9999 1.61970359802246 1.69956676483154 -9999 -9999 1.77761753082275 1.76255195617676 1.79744968414307 1.77487163543701 1.76126998901367 1.74144721984863 1.69765205383301 1.83390186309814 1.99701965332031 2.06280212402344 1.9117166519165 1.98858283996582 1.97919960021973 1.844567527771 1.62018882751465 1.66815731048584 1.05891929626465 1.34940399169922 1.65806728363037 1.71112266540527 1.84500686645508 0.501165733337402 0.758570194244385 0.64823844909668 0.375794620513916 0.31899338722229 1.87590614318848 1.68414722442627 1.81096698760986 1.8290446472168 1.55495738983154 1.83479415893555 0.438308658599854 1.34300216674805 0.426638689041138 0.293447256088257 0.289592542648315 1.48454429626465 1.12676559448242 -9999 -9999 -9999 -9999 -9999 -9999 -9999 -9999 -9999 -9999 -9999 -9999 0.176437768936157 0.210231041908264 0.189479026794434 0.280582551956177 0.281291341781616 0.232864766120911 0.259692392349243 0.31064435005188 0.313093643188477 0.818283061981201 0.994524192810059 1.07403579711914 1.57059871673584 1.60417533874512 1.60919700622559 1.63148609161377 1.64618728637695 1.64733604431152 1.64756412506104 1.665842628479 1.67684452056885 1.68560131072998 1.76950607299805 1.77258304595947 1.77890247344971 1.78508571624756 1.79035194396973 1.79682266235352 1.80282634735107 1.80747688293457 1.81318302154541 1.81682968139648 1.9058406829834 1.91002246856689 1.91276870727539 1.91657249450684 1.92170288085938 1.92511985778809 1.10054180145264 1.10128154754639 1.10370746612549 1.10783809661865 1.11069282531738 1.11336971282959 1.11515132904053 1.11635604858398 1.16607662200928 1.16779930114746 1.21557437896729 1.21969619750977 1.26962013244629 1.27085483551025 1.27148380279541 1.27193367004395 1.27235858917236 1.27312225341797 1.27332824707031 1.27293296813965 1.27194042205811 1.22464817047119 1.17162139892578 1.17022247314453 1.1223059463501 1.12920867919922 1.17750183105469 1.21810283660889 1.22075374603271 1.22113437652588 1.22151020050049 1.22121253967285 1.220866355896 1.22005199432373 1.21970077514648 1.21875549316406 1.16906318664551 1.16787117004395 1.16732276916504 1.16559631347656 1.16301212310791 1.16203582763672 1.16082458496094 1.06315441131592 1.01048767089844 0.813754920959473 1.41472652435303 1.32479415893555 1.24208839416504 1.06236694335937 0.969128036499023 0.961779556274414 0.955823707580566 0.780122966766357 0.662091407775879 0.596949234008789 0.266474533081055 0.0995613598823547 0.712298583984375 0.198517284393311 0.128839416503906 0.0650070333480835 0.0562597274780273 0.049554226398468 0.0527220046520233 0.0563543558120728 0.0554689264297485 0.0793285417556763 0.0609277296066284 -9999 -9999 -9999 -9999 -9999 -9999 -9999 -9999 -9999 -9999 -9999 -9999 -9999 -9999 -9999 -9999 -9999 -9999 -9999 -9999 -9999 -9999 -9999 -9999 -9999 -9999 -9999 -9999 -9999 -9999 -9999 -9999 -9999 -9999 -9999 -9999 -9999 -9999 -9999 -9999 -9999 -9999 -9999 -9999 -9999 -9999 -9999 -9999 -9999 -9999 -9999 -9999 -9999 -9999 -9999 -9999 -9999 -9999 -9999 -9999 -9999 -9999 -9999 -9999 -9999 -9999 -9999 0.117428247928619 0.219061045646667 0.372834091186523 0.823356513977051 -9999 -9999 -9999 -9999 -9999 -9999 -9999 -9999 -9999 -9999 -9999 -9999 -9999 -9999 -9999 0.221976041793823 -9999 -9999 -9999 -9999 -9999 -9999 -9999 -9999 -9999 -9999 -9999 -9999 -9999 -9999 -9999 -9999 -9999 -9999 -9999 -9999 -9999 -9999 -9999 -9999 -9999 -9999 -9999 -9999 -9999 -9999 -9999 -9999 -9999 -9999 -9999 -9999 -9999 -9999 -9999 -9999 -9999 -9999 -9999 -9999 -9999 -9999 -9999 -9999 -9999 -9999 -9999 -9999 -9999 -9999 -9999 -9999 -9999 -9999 -9999 -9999 -9999 -9999 -9999 -9999 -9999 -9999 -9999 -9999 -9999 -9999 -9999 -9999 -9999 -9999 -9999 -9999 -9999 -9999 -9999 -9999 0.261542129516602 0.193153595924377 0.19627438545227 0.188768563270569 0.186674022674561 0.170473809242249 0.184868187904358 -9999 -9999 -9999 -9999 -9999 -9999 -9999 -9999 -9999 -9999 -9999 -9999 -9999 -9999 -9999 -9999 -9999 -9999 -9999 -9999 -9999 -9999 -9999 -9999 -9999 -9999 -9999 -9999 -9999 -9999 -9999 -9999 -9999 -9999 -9999 -9999 -9999 -9999 -9999 -9999 -9999 -9999 -9999 -9999 -9999 -9999 -9999 -9999 -9999 -9999 -9999 0.182216348648071 0.183414659500122 0.184316453933716 0.183918256759644 -9999 0.18998996257782 -9999 -9999 -9999 -9999 -9999 -9999 0.202101988792419 417.569384765625 415.59884765625 410.087021484375 401.608505859375 380.7148828125 350.203095703125 397.888857421875 404.6201953125 402.580458984375 329.135654296875 358.06833984375 389.916181640625 380.292802734375 0.204229488372803 366.979892578125 357.205458984375 360.7826953125 355.18037109375 349.2821484375 348.510263671875 347.086962890625 0.202654309272766 -9999 -9999 -9999 -9999 -9999 -9999 -9999 -9999 -9999 -9999 -9999 -9999 -9999 -9999 -9999 -9999 -9999 -9999 -9999 -9999 -9999 -9999 -9999 -9999 -9999 -9999 -9999 -9999 -9999 -9999 -9999 -9999 -9999 -9999 -9999 -9999 -9999 -9999 -9999 -9999 -9999 -9999 -9999 -9999 -9999 -9999 -9999 -9999 -9999 -9999 -9999 -9999 -9999 -9999 -9999 -9999 -9999 -9999 -9999 -9999 -9999 -9999 -9999 -9999 -9999 -9999 -9999 -9999 -9999 -9999 -9999 -9999 -9999 0.953805027008057 0.981206817626953 -9999 -9999 -9999 -9999 -9999 -9999 -9999 -9999 -9999 -9999 -9999 -9999 -9999 -9999 -9999 -9999 -9999 -9999 -9999 -9999 -9999 -9999 -9999 -9999 -9999 -9999 -9999 -9999 -9999 -9999 -9999 -9999 -9999 -9999 -9999 -9999 -9999 -9999 -9999 -9999 -9999 -9999 -9999 -9999 -9999 -9999 -9999 -9999 -9999 -9999 -9999 -9999 -9999 -9999 -9999 -9999 -9999 -9999 -9999 -9999 -9999
-9999 -9999 -9999 -9999 -9999 -9999 -9999 -9999 -9999 -9999 -9999 -9999 -9999 -9999 -9999 -9999 -9999 -9999 -9999 -9999 -9999 -9999 -9999 -9999 -9999 -9999 -9999 -9999 -9999 -9999 -9999 -9999 -9999 -9999 -9999 -9999 -9999 -9999 -9999 -9999 -9999 -9999 -9999 -9999 -9999 -9999 -9999 -9999 -9999 -9999 -9999 -9999 -9999 -9999 -9999 -9999 -9999 -9999 -9999 -9999 -9999 -9999 -9999 -9999 -9999 -9999 -9999 -9999 -9999 -9999 -9999 -9999 -9999 -9999 -9999 -9999 -9999 -9999 -9999 -9999 -9999 -9999 -9999 -9999 -9999 -9999 -9999 -9999 -9999 -9999 -9999 -9999 -9999 -9999 -9999 -9999 -9999 -9999 -9999 -9999 -9999 -9999 -9999 -9999 -9999 -9999 -9999 -9999 -9999 -9999 -9999 -9999 -9999 -9999 0.822219886779785 0.868432502746582 0.871226692199707 0.893873233795166 0.875602684020996 0.915499362945557 0.859083595275879 0.846628932952881 0.85468168258667 -9999 0.874034900665283 0.872238235473633 0.916674842834473 0.816316680908203 0.639142227172852 0.641091728210449 0.609355716705322 0.611050701141357 0.633157081604004 0.631990242004394 0.624566631317139 -9999 -9999 -9999 -9999 0.518432121276855 0.500626773834228 0.49221622467041 0.42936484336853 0.35687876701355 -9999 -9999 -9999 -9999 -9999 -9999 -9999 0.242399654388428 0.423833284378052 0.645940017700195 0.729281272888184 0.735762691497803 0.819977874755859 0.957143726348877 1.13084827423096 1.15885425567627 1.41191917419434 1.50567901611328 1.59190475463867 1.65014842987061 1.61569484710693 -9999 -9999 1.67973724365234 1.75460632324219 1.59884719848633 1.61122890472412 1.56989856719971 1.62780372619629 1.9001399230957 1.91309062957764 1.91140239715576 1.93731857299805 1.90321346282959 1.91140605926514 1.97224090576172 1.89003536224365 1.70238876342773 0.957609443664551 0.971705360412598 0.839618682861328 0.736473255157471 0.641451873779297 1.61832847595215 1.67427429199219 0.417705974578857 0.456140584945679 0.448860483169556 0.48908712387085 0.641745357513428 1.81742923736572 2.02801300048828 1.61277877807617 1.75754127502441 0.294104290008545 0.340114717483521 0.299947385787964 0.564536991119385 0.435587282180786 -9999 -9999 -9999 -9999 -9999 -9999 -9999 -9999 -9999 -9999 -9999 -9999 -9999 -9999 -9999 -9999 -9999 0.209355883598328 0.199548296928406 0.218688154220581 0.216665439605713 0.238732838630676 0.230781011581421 0.238781275749207 0.237141380310059 0.255217094421387 0.276840763092041 0.273114681243896 0.23337550163269 0.255192489624023 0.233806171417236 0.248660516738892 0.237312669754028 0.282616682052612 0.338600549697876 0.993877372741699 1.08491729736328 1.61306911468506 1.64102966308594 1.69272811889648 1.79553646087646 1.82000072479248 1.8376305770874 1.84883193969727 1.85096260070801 1.85998065948486 1.86836849212646 1.87689800262451 1.88534706115723 1.89166797637939 1.90245620727539 1.90929794311523 1.91554149627686 2.00356773376465 2.0109171295166 2.01717086791992 2.02121726989746 1.16004272460937 1.21057994842529 1.2602172088623 1.26450508117676 1.26569114685059 1.26674434661865 1.26767967224121 1.31737014770508 1.31938488006592 1.31993728637695 1.32342819213867 1.371240234375 1.371123046875 1.32408634185791 1.32259883880615 1.32219692230225 1.27335914611816 1.27341499328613 1.27186672210693 1.27141971588135 1.27142498016357 1.27197463989258 1.27188537597656 1.27180686950684 1.27164848327637 1.27151069641113 1.27069507598877 1.27058624267578 1.27010662078857 1.26983985900879 1.22011138916016 1.21963565826416 1.16989402770996 1.16910095214844 1.16830020904541 1.1665697479248 1.16536708831787 1.1651736831665 1.11448951721191 1.0153889465332 0.915046463012695 0.81855016708374 1.41911190032959 1.4153727722168 1.32364345550537 1.23488525390625 1.23311496734619 1.13971035003662 1.02195087432861 0.8294993019104 0.425832710266113 0.569948673248291 0.110599329471588 0.106643471717834 0.0783534550666809 0.07250328540802 0.0663440322875977 0.0671141052246094 0.0854137372970581 0.0524816465377808 0.0545350635051727 0.0504081773757935 0.0782723164558411 -9999 -9999 -9999 -9999 -9999 -9999 -9999 -9999 -9999 -9999 -9999 -9999 -9999 -9999 -9999 -9999 -9999 -9999 -9999 -9999 -9999 -9999 -9999 -9999 -9999 -9999 -9999 -9999 -9999 -9999 -9999 -9999 -9999 -9999 -9999 -9999 -9999 -9999 -9999 -9999 -9999 -9999 -9999 -9999 -9999 -9999 -9999 -9999 -9999 -9999 -9999 -9999 -9999 -9999 -9999 -9999 -9999 -9999 -9999 -9999 -9999 -9999 -9999 -9999 -9999 -9999 -9999 -9999 -9999 -9999 -9999 -9999 -9999 -9999 -9999 -9999 -9999 -9999 -9999 -9999 -9999 -9999 -9999 -9999 -9999 -9999 -9999 0.173290400505066 -9999 -9999 -9999 -9999 -9999 -9999 -9999 -9999 -9999 -9999 -9999 -9999 -9999 -9999 -9999 -9999 -9999 -9999 -9999 -9999 -9999 -9999 -9999 -9999 -9999 -9999 -9999 -9999 -9999 -9999 -9999 -9999 -9999 -9999 -9999 -9999 -9999 -9999 -9999 -9999 -9999 -9999 -9999 -9999 -9999 -9999 -9999 -9999 -9999 -9999 -9999 -9999 -9999 -9999 -9999 -9999 -9999 -9999 -9999 -9999 -9999 -9999 -9999 -9999 -9999 -9999 -9999 -9999 -9999 0.165444846153259 0.166415333747864 0.457876968383789 0.293979063034058 0.246165933609009 0.249907207489014 0.22237678527832 0.209720935821533 0.214043283462524 0.233701915740967 0.217781867980957 0.217978720664978 0.211677174568176 0.193018012046814 0.190421862602234 0.206207685470581 0.223740134239197 0.203622236251831 -9999 -9999 -9999 -9999 -9999 -9999 -9999 -9999 -9999 -9999 -9999 -9999 -9999 -9999 -9999 -9999 -9999 -9999 -9999 -9999 -9999 -9999 -9999 -9999 -9999 -9999 -9999 -9999 -9999 -9999 -9999 -9999 -9999 -9999 -9999 -9999 -9999 -9999 -9999 -9999 -9999 -9999 -9999 -9999 -9999 -9999 -9999 -9999 0.195485315322876 0.190066180229187 0.190680212974548 0.19332019329071 275.43955078125 287.535380859375 355.291201171875 0.209233160018921 0.221928548812866 0.222013463973999 0.20887011051178 380.84654296875 401.501103515625 412.24412109375 413.731494140625 421.46203125 421.272568359375 425.457744140625 423.88681640625 419.52181640625 422.543994140625 416.519970703125 416.363642578125 390.363427734375 294.755126953125 316.197275390625 328.20029296875 349.556923828125 342.3384375 312.037529296875 296.26845703125 287.922041015625 239.347236328125 279.6890625 346.894951171875 371.420244140625 356.74705078125 343.047802734375 338.285390625 336.070107421875 337.25806640625 -9999 -9999 -9999 -9999 -9999 -9999 -9999 -9999 -9999 -9999 -9999 -9999 -9999 -9999 -9999 -9999 -9999 -9999 -9999 -9999 -9999 -9999 -9999 -9999 -9999 -9999 -9999 -9999 -9999 -9999 -9999 -9999 -9999 -9999 -9999 -9999 -9999 -9999 -9999 -9999 -9999 -9999 -9999 -9999 -9999 -9999 -9999 -9999 1.06058967590332 1.03374984741211 1.04955551147461 1.02262092590332 -9999 -9999 -9999 1.24525634765625 0.964157981872559 -9999 -9999 -9999 -9999 -9999 -9999 -9999 -9999 -9999 -9999 -9999 -9999 -9999 -9999 -9999 -9999 -9999 -9999 -9999 -9999 -9999 -9999 -9999 -9999 -9999 -9999 -9999 -9999 -9999 -9999 -9999 -9999 -9999 -9999 -9999 -9999 -9999 -9999 -9999 -9999 -9999 -9999 -9999 -9999 -9999 -9999 -9999 -9999 -9999 -9999 -9999 -9999 -9999 -9999 -9999 -9999 -9999 -9999 -9999 -9999 -9999 -9999 -9999 -9999 -9999 -9999 -9999 -9999 -9999 -9999 -9999 -9999 -9999 -9999 -9999 -9999
-9999 -9999 -9999 -9999 -9999 -9999 -9999 -9999 -9999 -9999 -9999 -9999 -9999 -9999 -9999 -9999 -9999 -9999 -9999 -9999 -9999 -9999 -9999 -9999 -9999 -9999 -9999 -9999 -9999 -9999 -9999 -9999 -9999 -9999 -9999 -9999 -9999 -9999 -9999 -9999 -9999 -9999 -9999 -9999 -9999 -9999 -9999 -9999 -9999 -9999 -9999 -9999 -9999 -9999 -9999 -9999 -9999 -9999 -9999 -9999 -9999 -9999 -9999 -9999 -9999 -9999 -9999 -9999 -9999 -9999 -9999 -9999 -9999 -9999 -9999 -9999 -9999 -9999 -9999 -9999 -9999 -9999 -9999 -9999 -9999 -9999 -9999 -9999 -9999 -9999 -9999 -9999 -9999 -9999 -9999 -9999 -9999 -9999 -9999 -9999 -9999 -9999 -9999 -9999 -9999 -9999 -9999 -9999 -9999 -9999 -9999 -9999 -9999 -9999 0.781179714202881 0.786270332336426 -9999 0.813990497589111 0.812673568725586 0.814399681091309 0.820753383636475 0.793458766937256 0.798819179534912 0.820358619689941 0.827963962554932 0.714419918060303 0.724252796173096 0.744606227874756 0.728672618865967 0.672729778289795 0.705667705535889 0.74234447479248 0.553151149749756 0.64525915145874 0.604547424316406 0.596158790588379 0.546292991638184 -9999 -9999 -9999 0.356984481811523 0.36840087890625 0.376473054885864 0.376089878082275 0.365895395278931 0.365360670089722 0.364983987808228 0.364136924743652 0.287374534606934 -9999 -9999 -9999 0.309546689987183 0.454277286529541 0.502081489562988 0.715402336120605 0.717238597869873 0.858658847808838 1.06900085449219 1.07582897186279 1.462477684021 1.52332363128662 1.7017102432251 1.72312213897705 1.58341335296631 -9999 -9999 1.50161121368408 -9999 1.61854316711426 1.58583984375 -9999 -9999 -9999 -9999 1.5300630569458 1.65932910919189 1.69941432952881 1.80052001953125 1.7535001373291 1.55436447143555 1.81181968688965 0.732258968353271 0.656283187866211 -9999 1.21143985748291 -9999 -9999 -9999 1.52625812530518 1.75306537628174 1.78257110595703 1.87081981658936 0.334569683074951 0.603702278137207 1.01573822021484 0.98904167175293 0.334517841339111 0.563793296813965 0.364467430114746 -9999 0.369562425613403 -9999 -9999 -9999 -9999 -9999 -9999 -9999 -9999 -9999 -9999 -9999 -9999 -9999 -9999 -9999 -9999 -9999 -9999 -9999 -9999 -9999 -9999 -9999 0.211232199668884 0.185715737342834 -9999 -9999 -9999 -9999 -9999 -9999 -9999 -9999 -9999 -9999 -9999 -9999 0.367196502685547 0.256515111923218 0.224971232414246 0.265020933151245 0.328615808486938 1.04373699188232 1.65023036956787 1.7157740020752 1.75941078186035 1.78100326538086 1.80566699981689 1.88913951873779 1.90286144256592 1.92354721069336 1.9382462310791 1.96243286132812 2.05940368652344 2.15051147460937 2.16480834960938 2.17126625061035 2.17902191162109 2.18946212768555 2.19191825866699 1.25720798492432 1.26473075866699 1.30749732971191 1.31398063659668 1.31570491790771 1.31640174865723 1.3179772567749 1.36727977752686 1.46532085418701 1.46904796600342 1.46968128204346 1.46941463470459 1.45492012023926 1.37149166107178 1.325075340271 1.32254207611084 1.31724826812744 1.32204734802246 1.2732612991333 1.27346431732178 1.2729243850708 1.2723237991333 1.27226577758789 1.27213073730469 1.27183811187744 1.2716760635376 1.27089088439941 1.27054298400879 1.26999320983887 1.26873573303223 1.2679248046875 1.21827072143555 1.16867259979248 1.16828762054443 1.16608211517334 1.16490634918213 1.16326686859131 1.01643047332764 0.916681137084961 0.823705615997314 1.4161096572876 1.41220481872559 1.40587577819824 1.38673393249512 1.22162601470947 1.19731578826904 1.10141384124756 0.995884552001953 0.63857328414917 0.417252788543701 0.202523202896118 0.158700299263 0.0895235466957092 0.110791819095612 0.172904348373413 0.150825119018555 0.185891275405884 0.136130261421204 0.0723125410079956 -9999 -9999 -9999 -9999 -9999 -9999 -9999 -9999 -9999 -9999 -9999 -9999 -9999 -9999 -9999 -9999 -9999 -9999 -9999 -9999 -9999 -9999 -9999 -9999 -9999 -9999 -9999 -9999 -9999 -9999 -9999 -9999 -9999 -9999 -9999 -9999 -9999 -9999 -9999 -9999 -9999 -9999 -9999 -9999 -9999 -9999 -9999 -9999 -9999 -9999 -9999 -9999 -9999 -9999 -9999 -9999 -9999 -9999 -9999 -9999 -9999 -9999 -9999 -9999 -9999 -9999 -9999 -9999 -9999 -9999 -9999 -9999 -9999 -9999 -9999 -9999 -9999 -9999 -9999 -9999 -9999 -9999 -9999 -9999 -9999 -9999 -9999 -9999 -9999 -9999 -9999 -9999 -9999 -9999 -9999 -9999 -9999 -9999 -9999 -9999 -9999 -9999 -9999 -9999 -9999 -9999 -9999 -9999 -9999 -9999 -9999 -9999 -9999 -9999 -9999 -9999 -9999 -9999 -9999 -9999 -9999 -9999 -9999 -9999 -9999 -9999 -9999 -9999 -9999 -9999 -9999 -9999 -9999 -9999 -9999 -9999 -9999 -9999 -9999 -9999 -9999 -9999 -9999 -9999 -9999 -9999 -9999 -9999 -9999 -9999 -9999 -9999 -9999 -9999 -9999 0.227081565856934 0.295019674301147 0.198855185508728 0.205731081962585 0.210127401351929 0.269409513473511 0.255334510803223 0.238434119224548 0.220289840698242 0.217884750366211 0.237571263313293 0.282742767333984 0.248514890670776 0.283840370178223 0.216321702003479 0.209057493209839 0.300638208389282 -9999 -9999 -9999 -9999 -9999 -9999 -9999 -9999 -9999 -9999 -9999 -9999 -9999 -9999 -9999 -9999 -9999 -9999 -9999 -9999 -9999 -9999 -9999 -9999 -9999 -9999 -9999 -9999 -9999 -9999 -9999 -9999 -9999 -9999 -9999 -9999 -9999 -9999 -9999 -9999 -9999 -9999 -9999 -9999 -9999 -9999 -9999 0.198900947570801 0.205172739028931 0.190910353660583 229.428618164062 253.118525390625 263.524306640625 241.656240234375 182.948818359375 193.00060546875 184.65474609375 184.419111328125 307.170322265625 345.13318359375 353.302177734375 349.684541015625 329.982392578125 349.548515625 370.499677734375 394.006875 404.54701171875 411.792216796875 416.331826171875 418.233544921875 418.504453125 426.04119140625 413.01193359375 401.348291015625 408.528369140625 421.657060546875 387.1210546875 327.282275390625 243.812958984375 58.3938977050781 40.8432934570313 233.396337890625 0.621045742034912 1.61822593688965 0.929381275177002 7.27781616210937 32.2768725585938 27.5932379150391 268.9972265625 269.280615234375 312.184189453125 342.135 369.09861328125 331.901455078125 335.354677734375 -9999 -9999 -9999 -9999 -9999 -9999 -9999 -9999 -9999 -9999 -9999 -9999 -9999 -9999 -9999 -9999 -9999 -9999 -9999 -9999 -9999 -9999 -9999 -9999 -9999 -9999 -9999 -9999 -9999 -9999 -9999 -9999 -9999 -9999 -9999 -9999 -9999 -9999 -9999 -9999 -9999 -9999 -9999 18.1698284912109 0.13998640537262 -9999 367.89462890625 385.011357421875 390.170654296875 16.0043096923828 16.7604125976562 13.3130502319336 376.5950390625 408.088037109375 460.333916015625 420.990087890625 429.8823046875 374.318056640625 374.471923828125 374.077763671875 363.942041015625 0.949480018615723 0.920742301940918 -9999 0.871419582366943 -9999 -9999 -9999 -9999 -9999 -9999 -9999 -9999 -9999 -9999 -9999 -9999 -9999 -9999 -9999 -9999 -9999 -9999 -9999 -9999 -9999 -9999 -9999 -9999 -9999 -9999 -9999 -9999 -9999 -9999 -9999 -9999 -9999 -9999 -9999 -9999 -9999 -9999 -9999 -9999 -9999 -9999 -9999 -9999 -9999 -9999 -9999 -9999 -9999 -9999 -9999 -9999 -9999 -9999 -9999 -9999 -9999 -9999 -9999 -9999 -9999 -9999 -9999 -9999 -9999 -9999 -9999
-9999 -9999 -9999 -9999 -9999 -9999 -9999 -9999 -9999 -9999 -9999 -9999 -9999 -9999 -9999 -9999 -9999 -9999 -9999 -9999 -9999 -9999 -9999 -9999 -9999 -9999 -9999 -9999 -9999 -9999 -9999 -9999 -9999 -9999 -9999 -9999 -9999 -9999 -9999 -9999 -9999 -9999 -9999 -9999 -9999 -9999 -9999 -9999 -9999 -9999 -9999 -9999 -9999 -9999 -9999 -9999 -9999 -9999 -9999 -9999 -9999 -9999 -9999 -9999 -9999 -9999 -9999 -9999 -9999 -9999 -9999 -9999 -9999 -9999 -9999 -9999 -9999 -9999 -9999 -9999 -9999 -9999 -9999 -9999 -9999 -9999 -9999 -9999 -9999 -9999 -9999 -9999 -9999 -9999 -9999 -9999 -9999 -9999 -9999 -9999 -9999 -9999 -9999 -9999 -9999 -9999 0.319461250305176 -9999 -9999 -9999 -9999 -9999 -9999 -9999 -9999 -9999 -9999 -9999 -9999 -9999 -9999 -9999 -9999 -9999 0.623654594421387 0.62089822769165 0.653802394866943 0.618301792144775 0.573900947570801 0.54319278717041 0.584497661590576 0.474565830230713 0.510687446594238 0.496752033233643 0.475488023757935 0.419477777481079 0.386549406051636 0.361177082061768 0.368477067947388 0.404621543884277 0.384198846817017 0.383208703994751 0.357104816436768 0.362050552368164 0.354910011291504 0.353901071548462 0.353745002746582 0.348149528503418 0.339754199981689 -9999 0.43744176864624 0.361412401199341 0.352789478302002 -9999 -9999 -9999 -9999 -9999 1.12368713378906 1.09242485046387 1.24979679107666 1.58216011047363 1.77898349761963 1.77097011566162 1.41297328948975 -9999 1.61111938476562 1.40944690704346 1.47172359466553 1.54413860321045 1.50955364227295 1.53214851379395 1.45977848052979 -9999 -9999 1.52149635314941 1.60361949920654 1.60124393463135 1.61895195007324 1.54816612243652 1.6388582611084 1.70427978515625 1.4287996673584 1.61246109008789 1.68453311920166 1.68115345001221 1.70062282562256 1.4064066696167 1.78709278106689 1.82271823883057 0.335820837020874 1.13194805145264 1.43722274780273 1.49890331268311 2.09102737426758 2.10523063659668 2.09720123291016 1.39118808746338 1.16932125091553 0.382576560974121 0.232849373817444 -9999 -9999 -9999 -9999 -9999 -9999 -9999 -9999 -9999 -9999 -9999 -9999 -9999 -9999 -9999 -9999 -9999 -9999 -9999 -9999 -9999 -9999 -9999 -9999 -9999 -9999 -9999 -9999 -9999 -9999 -9999 -9999 -9999 -9999 -9999 -9999 -9999 -9999 -9999 -9999 -9999 -9999 0.182267746925354 0.262660531997681 0.33160623550415 0.844772815704346 1.46359039306641 1.71757026672363 1.82601299285889 1.94791694641113 1.97608680725098 2.00505340576172 2.0315453338623 2.08051597595215 2.10637046813965 2.1248055267334 2.22950019836426 2.24248512268066 2.25165824890137 2.26412567138672 2.2674584197998 1.30245941162109 1.30888801574707 1.34670902252197 1.35996883392334 1.36310691833496 1.40325267791748 1.40436893463135 1.41613826751709 1.46665340423584 1.46731407165527 1.46851295471191 1.46880043029785 1.46573501586914 1.41134422302246 1.41507064819336 1.37099269866943 1.3713790512085 1.37151500701904 1.37183177947998 1.37152565002441 1.37173965454102 1.40997550964355 1.42162696838379 1.42016315460205 1.45333980560303 1.45534664154053 1.45672187805176 1.45530006408691 1.41856990814209 1.37876895904541 1.37465927124023 1.37573627471924 1.36369926452637 1.31395408630371 1.26324668884277 1.26100616455078 1.25925270080566 1.06513114929199 0.991548042297363 1.50494293212891 1.4926159286499 1.40542659759521 1.39844902038574 1.22177238464355 1.21328189849854 1.10316890716553 0.940850429534912 0.68602180480957 0.360437965393066 0.357771377563477 0.271260051727295 0.225480937957764 0.221032977104187 0.207716603279114 0.19265175819397 0.138036775588989 0.108618714809418 0.087064061164856 0.0652758479118347 0.0581289482116699 0.058270103931427 0.0591957449913025 0.0562137758731842 -9999 -9999 -9999 -9999 -9999 -9999 -9999 -9999 -9999 -9999 -9999 -9999 -9999 -9999 -9999 -9999 -9999 -9999 -9999 -9999 -9999 -9999 -9999 -9999 -9999 -9999 -9999 -9999 -9999 -9999 -9999 -9999 -9999 -9999 -9999 -9999 -9999 -9999 -9999 -9999 -9999 -9999 -9999 -9999 -9999 -9999 -9999 -9999 -9999 -9999 -9999 -9999 -9999 -9999 -9999 -9999 -9999 -9999 -9999 -9999 -9999 -9999 -9999 -9999 -9999 -9999 -9999 -9999 -9999 -9999 -9999 -9999 -9999 -9999 -9999 -9999 -9999 -9999 -9999 -9999 -9999 -9999 -9999 -9999 -9999 -9999 -9999 -9999 -9999 -9999 -9999 -9999 -9999 -9999 -9999 -9999 -9999 -9999 -9999 -9999 -9999 -9999 -9999 -9999 -9999 -9999 -9999 -9999 -9999 -9999 -9999 -9999 -9999 -9999 -9999 -9999 -9999 -9999 -9999 -9999 -9999 -9999 -9999 -9999 -9999 -9999 -9999 -9999 -9999 -9999 -9999 -9999 -9999 -9999 -9999 -9999 -9999 -9999 -9999 -9999 -9999 -9999 -9999 -9999 -9999 -9999 0.183887815475464 0.19180299282074 14.6589102172852 0.363017148971558 0.213843512535095 0.198263697624207 0.217012810707092 0.219987030029297 0.201730341911316 0.214607963562012 0.260813484191895 0.35897349357605 0.232399091720581 0.19809901714325 -9999 -9999 -9999 -9999 -9999 -9999 -9999 -9999 -9999 -9999 -9999 -9999 -9999 -9999 -9999 -9999 -9999 -9999 -9999 -9999 -9999 -9999 -9999 -9999 -9999 -9999 -9999 -9999 -9999 -9999 -9999 -9999 -9999 -9999 -9999 -9999 -9999 -9999 0.258921918869019 0.246526708602905 -9999 -9999 -9999 -9999 -9999 -9999 -9999 -9999 -9999 0.2361012840271 0.238998613357544 0.206227698326111 146.648891601562 117.934907226563 138.47625 124.5092578125 153.715795898438 139.017421875 70.4260473632812 124.320336914062 87.4211059570312 90.4610009765625 162.361215820312 211.083061523437 228.259702148437 280.842744140625 320.0722265625 341.048701171875 372.3075 377.231044921875 381.6120703125 392.570625 393.292294921875 399.076171875 403.939423828125 407.161142578125 408.644560546875 417.615439453125 418.559736328125 416.178369140625 415.95123046875 408.795205078125 418.219072265625 420.42984375 437.79046875 413.560869140625 387.928974609375 362.469287109375 390.05841796875 386.567255859375 315.43048828125 305.875400390625 7.68258178710937 90.5315112304688 97.006025390625 104.274155273438 261.2670703125 307.4201953125 287.83798828125 339.763974609375 320.886240234375 316.8561328125 290.9615625 -9999 -9999 -9999 -9999 -9999 -9999 -9999 -9999 -9999 -9999 -9999 -9999 -9999 -9999 -9999 -9999 -9999 -9999 -9999 -9999 -9999 -9999 -9999 -9999 -9999 -9999 -9999 -9999 -9999 -9999 -9999 -9999 -9999 -9999 -9999 -9999 -9999 -9999 -9999 -9999 -9999 -9999 -9999 0.126604113578796 -9999 0.21178966999054 348.931669921875 354.693486328125 18.116484375 17.33865234375 12.9338104248047 13.2334826660156 349.464697265625 428.512998046875 355.867734375 291.095244140625 211.5059765625 371.55861328125 356.26359375 353.07123046875 351.684697265625 351.20484375 0.832469902038574 -9999 0.507783966064453 370.067900390625 372.77232421875 376.95064453125 386.808017578125 391.526279296875 390.82705078125 395.3919140625 0.212722263336182 0.211230826377869 -9999 -9999 -9999 -9999 -9999 -9999 -9999 -9999 -9999 -9999 -9999 -9999 -9999 -9999 -9999 -9999 -9999 -9999 -9999 -9999 -9999 -9999 -9999 -9999 -9999 -9999 -9999 -9999 -9999 -9999 -9999 -9999 -9999 -9999 -9999 -9999 -9999 -9999 -9999 -9999 -9999 -9999 -9999 -9999 -9999 -9999 -9999 -9999 -9999 -9999 -9999 -9999 -9999 -9999 -9999 -9999 -9999 -9999
-9999 -9999 -9999 -9999 -9999 -9999 -9999 -9999 -9999 -9999 -9999 -9999 -9999 -9999 -9999 -9999 -9999 -9999 -9999 -9999 -9999 -9999 -9999 -9999 -9999 -9999 -9999 -9999 -9999 -9999 -9999 -9999 -9999 -9999 -9999 -9999 -9999 -9999 -9999 -9999 -9999 -9999 -9999 -9999 -9999 -9999 -9999 -9999 -9999 -9999 -9999 -9999 -9999 -9999 -9999 -9999 -9999 -9999 -9999 -9999 -9999 -9999 -9999 -9999 -9999 -9999 -9999 -9999 -9999 -9999 -9999 -9999 -9999 -9999 -9999 -9999 -9999 -9999 -9999 -9999 -9999 -9999 -9999 -9999 -9999 -9999 -9999 -9999 -9999 -9999 -9999 -9999 -9999 -9999 -9999 -9999 -9999 -9999 -9999 -9999 -9999 -9999 -9999 -9999 -9999 -9999 -9999 -9999 -9999 -9999 -9999 -9999 -9999 -9999 -9999 -9999 -9999 -9999 -9999 -9999 -9999 -9999 -9999 -9999 -9999 -9999 -9999 -9999 0.548988075256348 0.417622175216675 -9999 0.402991991043091 0.409981842041016 0.41579080581665 0.368274793624878 0.442736291885376 0.371312599182129 0.387103414535522 0.353891487121582 0.382405643463135 0.370103445053101 0.39376690864563 -9999 0.361189985275269 0.356665134429932 0.356567115783691 0.357998685836792 -9999 -9999 -9999 -9999 -9999 -9999 -9999 -9999 -9999 -9999 -9999 -9999 1.0564599609375 1.20614685058594 1.53270252227783 1.63702503204346 -9999 -9999 -9999 -9999 1.40092769622803 1.11701889038086 1.15269401550293 1.37350101470947 1.23640548706055 1.30101219177246 -9999 -9999 1.51158771514893 1.13960311889648 1.43748023986816 0.899601459503174 1.52735069274902 1.62396686553955 1.59084812164307 1.12312602996826 1.55293441772461 1.64656688690186 1.67945159912109 1.72656131744385 1.8030207824707 1.77316967010498 1.73287479400635 0.292795686721802 1.31386299133301 0.558929500579834 0.921839447021484 1.76719562530518 0.443891315460205 0.544206047058105 0.315103282928467 0.25645191192627 0.449308662414551 0.456126937866211 -9999 -9999 -9999 -9999 -9999 -9999 -9999 -9999 -9999 -9999 -9999 -9999 -9999 -9999 -9999 -9999 -9999 -9999 -9999 -9999 -9999 -9999 -9999 -9999 -9999 -9999 -9999 -9999 -9999 -9999 -9999 -9999 -9999 -9999 -9999 -9999 -9999 -9999 -9999 -9999 -9999 -9999 -9999 0.19136830329895 0.181739001274109 0.236180362701416 0.364715795516968 1.00269836425781 1.76385509490967 1.82806629180908 1.9303825378418 2.02203552246094 2.05602653503418 2.12862602233887 2.15890640258789 2.20034088134766 2.2215559387207 2.29748199462891 2.31156532287598 2.34851943969727 2.35968292236328 2.36575744628906 1.39432479858398 1.40779598236084 1.45154674530029 1.44611400604248 1.44799530029297 1.45001289367676 1.45194591522217 1.44106475830078 1.36877769470215 1.36913040161133 1.36940414428711 1.40400890350342 1.42030471801758 1.42054962158203 1.46772880554199 1.46988590240479 1.46998752593994 1.46992481231689 1.46999370574951 1.47050136566162 1.51963851928711 1.5195715713501 1.51921588897705 1.51889465332031 1.51863372802734 1.51756359100342 1.51698314666748 1.47241458892822 1.46659938812256 1.46591686248779 1.46492237091064 1.46264339447021 1.46132411956787 1.40842163085937 1.35657897949219 1.35377243041992 2.1782251739502 1.84951377868652 1.75527397155762 1.56680477142334 1.55724826812744 1.45259376525879 1.29347145080566 1.01255710601807 0.759195041656494 0.357914714813232 0.358571090698242 0.354660186767578 0.3704065990448 0.358301839828491 0.353848371505737 0.222086977958679 0.15418776512146 0.133681468963623 0.12352662563324 0.0695529341697693 0.070532591342926 0.0744593811035156 0.079136209487915 0.0572386050224304 0.0563891422748566 -9999 -9999 -9999 -9999 -9999 -9999 -9999 -9999 -9999 -9999 -9999 -9999 -9999 -9999 -9999 -9999 -9999 -9999 -9999 -9999 -9999 -9999 -9999 -9999 -9999 -9999 -9999 -9999 -9999 -9999 -9999 -9999 -9999 -9999 -9999 -9999 -9999 -9999 -9999 -9999 -9999 -9999 -9999 -9999 -9999 -9999 -9999 -9999 -9999 -9999 -9999 -9999 -9999 -9999 -9999 -9999 -9999 -9999 -9999 -9999 -9999 -9999 -9999 -9999 -9999 -9999 -9999 -9999 -9999 -9999 -9999 -9999 -9999 -9999 0.0965969115495682 -9999 -9999 -9999 -9999 -9999 -9999 -9999 -9999 -9999 -9999 -9999 -9999 -9999 -9999 -9999 -9999 -9999 -9999 -9999 -9999 -9999 -9999 -9999 -9999 -9999 -9999 -9999 -9999 -9999 -9999 -9999 -9999 -9999 -9999 -9999 -9999 -9999 -9999 -9999 -9999 -9999 -9999 -9999 -9999 -9999 -9999 -9999 -9999 -9999 -9999 -9999 -9999 -9999 -9999 -9999 -9999 -9999 -9999 -9999 -9999 -9999 -9999 -9999 -9999 -9999 -9999 -9999 -9999 -9999 -9999 -9999 -9999 0.149669380187988 0.899033260345459 0.240905141830444 0.210034132003784 0.206807584762573 0.208654046058655 0.254294013977051 0.626529521942139 2.68898414611816 34.9990612792969 0.175234866142273 -9999 -9999 -9999 -9999 -9999 -9999 -9999 -9999 -9999 -9999 -9999 -9999 -9999 -9999 -9999 -9999 -9999 -9999 -9999 -9999 -9999 -9999 -9999 -9999 -9999 -9999 -9999 -9999 -9999 -9999 -9999 -9999 -9999 -9999 -9999 -9999 1.08050731658936 0.742098426818848 -9999 -9999 -9999 -9999 -9999 -9999 -9999 -9999 -9999 -9999 0.210216422080994 0.225386281013489 59.7220239257813 76.4532202148438 83.865849609375 104.048510742188 86.19076171875 127.949780273437 88.7087182617187 134.669165039063 204.843984375 217.128442382812 163.269829101562 193.954028320312 230.200883789062 215.150463867187 210.144418945312 265.9583203125 284.296435546875 295.983046875 320.162197265625 345.34728515625 349.346630859375 338.661298828125 342.181845703125 361.893603515625 368.79333984375 378.32326171875 403.893955078125 410.14962890625 405.236748046875 404.538076171875 411.98654296875 428.163544921875 407.6129296875 403.224990234375 402.3308203125 384.841171875 342.897568359375 325.0360546875 317.00267578125 313.989375 307.551650390625 426.096416015625 315.319541015625 316.73033203125 302.7036328125 303.155302734375 298.160126953125 297.336826171875 296.4753515625 295.93259765625 293.480302734375 291.11671875 283.0271484375 282.0835546875 -9999 -9999 -9999 -9999 -9999 -9999 -9999 -9999 -9999 -9999 -9999 -9999 -9999 -9999 -9999 -9999 -9999 -9999 -9999 -9999 -9999 -9999 -9999 -9999 -9999 -9999 -9999 -9999 -9999 -9999 -9999 -9999 -9999 -9999 -9999 -9999 -9999 -9999 -9999 -9999 -9999 -9999 -9999 -9999 -9999 -9999 -9999 -9999 -9999 0.193201875686646 329.24537109375 15.8323516845703 15.5091705322266 0.360062570571899 486.37388671875 1.13470184326172 1.14946208953857 1.14723335266113 0.938300685882568 1.11328491210937 1.18389335632324 1.10833763122559 -9999 -9999 -9999 -9999 -9999 -9999 0.217749109268188 0.213169884681702 380.15126953125 387.437080078125 389.45765625 393.396943359375 0.200952100753784 0.198870334625244 -9999 -9999 -9999 -9999 -9999 -9999 -9999 -9999 -9999 -9999 -9999 -9999 -9999 -9999 -9999 -9999 -9999 -9999 -9999 -9999 -9999 -9999 -9999 -9999 -9999 -9999 -9999 -9999 -9999 -9999 -9999 -9999 -9999 -9999 -9999 -9999 -9999 -9999 -9999 -9999 -9999 -9999 -9999 -9999 -9999 -9999 -9999 -9999 -9999 -9999 -9999 -9999 -9999 -9999 -9999 -9999 -9999 -9999
-9999 -9999 -9999 -9999 -9999 -9999 -9999 -9999 -9999 -9999 -9999 -9999 -9999 -9999 -9999 -9999 -9999 -9999 -9999 -9999 -9999 -9999 -9999 -9999 -9999 -9999 -9999 -9999 -9999 -9999 -9999 -9999 -9999 -9999 -9999 -9999 -9999 -9999 -9999 -9999 -9999 -9999 -9999 -9999 -9999 -9999 -9999 -9999 -9999 -9999 -9999 -9999 -9999 -9999 -9999 -9999 -9999 -9999 -9999 -9999 -9999 -9999 -9999 -9999 -9999 -9999 -9999 -9999 -9999 -9999 -9999 -9999 -9999 -9999 -9999 -9999 -9999 -9999 -9999 -9999 -9999 -9999 -9999 -9999 -9999 -9999 -9999 -9999 -9999 -9999 -9999 -9999 -9999 -9999 -9999 -9999 -9999 -9999 -9999 -9999 -9999 -9999 -9999 -9999 -9999 -9999 -9999 -9999 -9999 -9999 0.427034168243408 0.734562435150146 0.993490104675293 1.02406494140625 1.06831432342529 1.03262168884277 1.00979953765869 0.99221923828125 0.966502075195313 0.582062301635742 0.229314951896667 0.255118246078491 0.258403959274292 0.406940631866455 0.446233921051025 0.367475824356079 -9999 -9999 -9999 -9999 -9999 -9999 0.396805200576782 0.404081382751465 0.404537658691406 0.401605653762817 0.40914891242981 -9999 -9999 -9999 -9999 -9999 -9999 -9999 -9999 -9999 -9999 -9999 -9999 -9999 -9999 -9999 -9999 -9999 -9999 -9999 -9999 -9999 -9999 -9999 -9999 -9999 -9999 0.664291477203369 0.653611278533936 -9999 -9999 -9999 -9999 -9999 1.59130107879639 1.56948268890381 1.3302978515625 1.56297122955322 1.07153457641602 -9999 -9999 -9999 -9999 -9999 -9999 -9999 -9999 1.63894111633301 1.68654109954834 1.43757007598877 0.829535293579101 0.949303436279297 0.466404190063477 0.596288738250732 -9999 -9999 -9999 -9999 -9999 1.74482357025146 2.13110206604004 -9999 -9999 -9999 -9999 -9999 -9999 -9999 -9999 -9999 -9999 -9999 -9999 -9999 -9999 -9999 -9999 -9999 -9999 -9999 -9999 -9999 -9999 -9999 -9999 -9999 -9999 -9999 -9999 -9999 -9999 -9999 -9999 -9999 -9999 -9999 -9999 -9999 -9999 -9999 -9999 -9999 -9999 -9999 -9999 -9999 -9999 -9999 -9999 0.173685393333435 0.180540089607239 0.245223827362061 0.397006902694702 1.32721080780029 1.81935894012451 1.88991245269775 1.97244346618652 2.02451843261719 2.10516311645508 2.15179138183594 2.26083229064941 2.2673558807373 2.29474136352539 2.30177627563477 2.34260902404785 2.32895965576172 2.35402610778809 2.36471076965332 1.35201530456543 1.35587368011475 1.35684940338135 1.36074577331543 1.3611270904541 1.36598922729492 1.3473059463501 1.31725868225098 1.31808723449707 1.35365112304687 1.36681446075439 1.36802169799805 1.36856174468994 1.41050617218018 1.42081226348877 1.4687377166748 1.50541431427002 1.51806003570557 1.51842178344727 1.51845737457275 1.51822116851807 1.51787750244141 1.51734489440918 1.51704746246338 1.51658752441406 1.51602241516113 1.5149210357666 1.51387847900391 1.51297966003418 1.51170879364014 1.50974636077881 1.50774421691895 1.45683219909668 1.39979370117187 2.36663887023926 2.18708267211914 2.01075004577637 1.73261558532715 1.53980918884277 1.35014156341553 1.15642055511475 0.731364326477051 0.530349826812744 0.471427345275879 0.33433985710144 0.335257873535156 0.291411008834839 0.434777269363403 0.48690616607666 0.182772617340088 0.11211761713028 0.104786946773529 0.0903311705589294 0.132211031913757 0.103753681182861 0.0877315735816956 0.103938875198364 0.12869861125946 -9999 -9999 -9999 -9999 -9999 -9999 -9999 -9999 -9999 -9999 -9999 -9999 -9999 -9999 -9999 -9999 -9999 -9999 -9999 -9999 -9999 -9999 -9999 -9999 -9999 -9999 -9999 -9999 -9999 -9999 -9999 -9999 -9999 -9999 -9999 -9999 -9999 -9999 -9999 -9999 -9999 -9999 -9999 -9999 -9999 -9999 -9999 -9999 -9999 -9999 -9999 -9999 -9999 -9999 -9999 -9999 -9999 -9999 -9999 -9999 -9999 -9999 -9999 -9999 -9999 -9999 -9999 -9999 -9999 -9999 -9999 -9999 -9999 -9999 -9999 0.113448888063431 0.10067867487669 -9999 -9999 -9999 -9999 -9999 -9999 -9999 -9999 -9999 -9999 -9999 -9999 -9999 -9999 -9999 -9999 -9999 -9999 -9999 -9999 -9999 -9999 -9999 -9999 -9999 -9999 -9999 -9999 -9999 -9999 -9999 -9999 -9999 -9999 -9999 -9999 -9999 -9999 -9999 -9999 -9999 -9999 -9999 -9999 -9999 -9999 -9999 -9999 -9999 -9999 -9999 -9999 -9999 -9999 -9999 -9999 -9999 -9999 -9999 -9999 -9999 -9999 -9999 -9999 -9999 -9999 -9999 -9999 -9999 -9999 0.158004212379456 27.3210974121094 1.71455726623535 0.341821002960205 0.210268263816834 0.336424913406372 0.550634593963623 8.60114227294922 0.16792067527771 0.223269667625427 -9999 -9999 -9999 -9999 -9999 -9999 -9999 -9999 -9999 -9999 -9999 -9999 -9999 -9999 -9999 -9999 -9999 -9999 -9999 -9999 -9999 -9999 -9999 -9999 -9999 -9999 -9999 -9999 -9999 -9999 -9999 -9999 -9999 -9999 -9999 -9999 -9999 -9999 -9999 -9999 -9999 -9999 -9999 -9999 -9999 0.25937931060791 0.263593654632568 -9999 -9999 -9999 0.297026195526123 0.302194547653198 0.366396074295044 0.411174631118774 166.320336914062 180.67130859375 184.42986328125 195.925327148438 216.198706054688 222.73423828125 201.84544921875 217.757358398438 229.16455078125 173.243774414062 274.16666015625 272.318115234375 278.441103515625 244.955610351562 306.969140625 307.50345703125 278.8618359375 274.34818359375 287.685380859375 300.284384765625 286.87458984375 338.619404296875 405.727236328125 417.6727734375 398.832392578125 408.38126953125 442.069423828125 408.589072265625 409.94396484375 397.513681640625 397.79859375 382.824990234375 370.648095703125 357.1640625 333.596337890625 319.423154296875 306.32208984375 307.47205078125 311.11974609375 294.925224609375 291.562060546875 291.528662109375 286.9041796875 282.49166015625 277.083515625 275.872265625 272.028984375 294.40458984375 298.5085546875 -9999 304.53837890625 271.412841796875 272.34111328125 307.837177734375 -9999 -9999 -9999 -9999 -9999 -9999 -9999 -9999 -9999 -9999 -9999 -9999 -9999 -9999 -9999 -9999 -9999 -9999 -9999 -9999 -9999 -9999 -9999 -9999 -9999 -9999 -9999 -9999 -9999 -9999 -9999 -9999 -9999 -9999 -9999 -9999 -9999 -9999 -9999 -9999 -9999 -9999 -9999 -9999 0.226561117172241 -9999 -9999 -9999 -9999 -9999 -9999 -9999 -9999 330.018955078125 333.2409375 0.356688508987427 0.509026679992676 -9999 -9999 -9999 -9999 -9999 -9999 -9999 -9999 -9999 -9999 -9999 -9999 -9999 -9999 -9999 -9999 -9999 -9999 -9999 -9999 -9999 -9999 -9999 -9999 -9999 -9999 -9999 -9999 -9999 -9999 -9999 -9999 -9999 -9999 -9999 -9999 -9999 -9999 -9999 -9999 -9999 -9999 -9999 -9999 -9999 -9999 -9999 -9999 -9999 -9999 -9999 -9999 -9999 -9999 -9999 -9999 -9999 -9999 -9999 -9999 -9999 -9999 -9999 -9999 -9999 -9999 -9999 -9999 -9999 -9999 -9999 -9999 -9999 -9999 -9999 -9999
-9999 -9999 -9999 -9999 -9999 -9999 -9999 -9999 -9999 -9999 -9999 -9999 -9999 -9999 -9999 -9999 -9999 -9999 -9999 -9999 -9999 -9999 -9999 -9999 -9999 -9999 -9999 -9999 -9999 -9999 -9999 -9999 -9999 -9999 -9999 -9999 -9999 -9999 -9999 -9999 -9999 -9999 -9999 -9999 -9999 -9999 -9999 -9999 -9999 -9999 -9999 -9999 -9999 -9999 -9999 -9999 -9999 -9999 -9999 -9999 -9999 -9999 -9999 -9999 -9999 -9999 -9999 -9999 -9999 -9999 -9999 -9999 -9999 -9999 -9999 -9999 -9999 -9999 -9999 -9999 -9999 -9999 -9999 -9999 -9999 -9999 -9999 -9999 -9999 -9999 -9999 -9999 -9999 -9999 -9999 -9999 -9999 -9999 -9999 -9999 -9999 -9999 -9999 -9999 -9999 -9999 -9999 -9999 -9999 -9999 -9999 0.394096298217773 0.600210113525391 1.01898101806641 1.1437869644165 1.18107021331787 1.22848743438721 1.26126686096191 1.26837776184082 1.1284557723999 0.243710432052612 0.251159391403198 0.238785696029663 0.321321058273315 1.0293660736084 0.852088623046875 0.308970279693604 0.345686502456665 0.908792896270752 -9999 -9999 -9999 -9999 -9999 -9999 -9999 -9999 -9999 -9999 -9999 -9999 -9999 -9999 0.384316091537476 0.385984668731689 -9999 0.401215953826904 0.1900950050354 0.197042999267578 0.194955668449402 0.398177032470703 -9999 -9999 -9999 -9999 -9999 -9999 0.448434133529663 0.426204071044922 0.401828126907349 0.816642894744873 0.896814422607422 1.32790901184082 1.36610733032227 0.629987297058105 1.24678825378418 -9999 -9999 1.55134311676025 1.5311954498291 1.54016750335693 1.63471572875977 1.66058612823486 1.67538345336914 1.62788349151611 1.55694305419922 1.66549209594727 1.44560668945312 0.874992713928223 0.734580059051514 -9999 -9999 -9999 0.655282173156738 0.460291614532471 0.471902503967285 0.487945461273193 0.496959686279297 0.493322067260742 0.46805760383606 -9999 -9999 0.810975952148437 1.17877990722656 0.493947315216064 0.482261638641357 0.481714725494385 0.913179244995117 0.492426052093506 0.869953193664551 0.549174785614014 0.372077980041504 0.635029449462891 1.28882137298584 0.300091667175293 -9999 -9999 -9999 -9999 -9999 -9999 -9999 -9999 -9999 -9999 -9999 -9999 -9999 -9999 -9999 -9999 -9999 -9999 -9999 -9999 -9999 -9999 -9999 -9999 -9999 -9999 -9999 -9999 -9999 -9999 -9999 -9999 -9999 -9999 -9999 -9999 -9999 -9999 -9999 -9999 -9999 0.174152355194092 0.17121630191803 0.208838295936584 0.294256582260132 0.875917339324951 1.7560502243042 1.85504402160645 1.9543537902832 2.04992980957031 2.09373252868652 2.1440013885498 2.1669605255127 2.19686462402344 2.2158927154541 2.24137847900391 2.25038429260254 2.26037132263184 2.33232856750488 2.33297309875488 1.30243057250977 1.3055961227417 1.35359218597412 1.35778690338135 1.35390083312988 1.35522274017334 1.31312690734863 1.31401027679443 1.31488140106201 1.31607433319092 1.31664516448975 1.3175129699707 1.31774871826172 1.31794235229492 1.32053649902344 1.46563659667969 1.46861137390137 1.51808406829834 1.51804206848145 1.51829933166504 1.51783138275146 1.51736892700195 1.51673046112061 1.51579685211182 1.5152311706543 1.51456066131592 1.51377628326416 1.50991218566895 1.50891483306885 1.50845260620117 1.50567981719971 1.50117839813232 2.53929885864258 2.34174293518066 2.0752409362793 1.93985778808594 1.50126205444336 1.16503955841064 0.567150421142578 0.515219249725342 0.48901216506958 0.434413976669312 0.34411322593689 0.159149236679077 0.262120141983032 0.298781776428223 0.101109974384308 0.193218054771423 0.31266529083252 0.372382535934448 0.126132502555847 0.0857462596893311 0.108665192127228 0.0904484581947327 0.0831842708587646 -9999 -9999 -9999 -9999 -9999 -9999 -9999 -9999 -9999 -9999 -9999 -9999 -9999 -9999 -9999 -9999 -9999 -9999 -9999 -9999 -9999 -9999 -9999 -9999 -9999 -9999 -9999 -9999 -9999 -9999 -9999 -9999 -9999 -9999 -9999 -9999 -9999 -9999 -9999 -9999 -9999 -9999 -9999 -9999 -9999 -9999 -9999 -9999 -9999 -9999 -9999 -9999 -9999 -9999 -9999 -9999 -9999 -9999 -9999 -9999 -9999 -9999 -9999 -9999 -9999 -9999 -9999 -9999 -9999 -9999 -9999 -9999 -9999 -9999 -9999 -9999 -9999 -9999 -9999 -9999 -9999 -9999 -9999 -9999 -9999 -9999 -9999 -9999 -9999 -9999 -9999 -9999 -9999 -9999 -9999 -9999 -9999 -9999 -9999 -9999 -9999 -9999 -9999 -9999 -9999 -9999 -9999 -9999 -9999 -9999 -9999 -9999 -9999 -9999 -9999 -9999 -9999 -9999 -9999 -9999 -9999 -9999 -9999 -9999 -9999 -9999 -9999 -9999 -9999 -9999 -9999 -9999 -9999 -9999 -9999 -9999 -9999 -9999 -9999 -9999 -9999 -9999 -9999 -9999 -9999 -9999 -9999 0.202521200180054 32.81349609375 4.78999053955078 1.16273403167725 0.276423082351685 0.307122488021851 0.393746681213379 14.0671856689453 38.0690625 0.179067878723145 -9999 -9999 -9999 -9999 -9999 -9999 -9999 -9999 -9999 -9999 -9999 -9999 -9999 -9999 -9999 -9999 -9999 -9999 -9999 -9999 -9999 -9999 -9999 -9999 -9999 -9999 -9999 -9999 -9999 -9999 -9999 -9999 -9999 -9999 -9999 -9999 -9999 -9999 -9999 -9999 -9999 -9999 -9999 0.27071436882019 0.274533548355103 0.280073089599609 0.282066822052002 0.285570602416992 0.290634813308716 0.301599369049072 0.322490615844727 6.10486358642578 51.0454211425781 108.959860839844 145.456274414063 187.514970703125 223.066743164063 289.009072265625 269.05716796875 239.9025 223.684892578125 254.306015625 249.154072265625 308.161171875 325.0660546875 346.49759765625 353.20517578125 369.03697265625 356.718984375 345.485595703125 352.536240234375 351.7275 350.9128125 390.980712890625 411.053583984375 427.452392578125 433.16619140625 441.44736328125 408.18908203125 412.7902734375 414.4114453125 418.806796875 421.0147265625 417.6598828125 415.62052734375 410.330302734375 411.3085546875 402.240703125 394.447177734375 381.843603515625 361.200439453125 345.09984375 334.712548828125 316.028056640625 304.902802734375 290.892333984375 321.105673828125 272.825537109375 268.57283203125 262.9416796875 295.988203125 -9999 252.714140625 254.995810546875 280.850009765625 254.924912109375 260.399384765625 259.549833984375 258.2651953125 259.04162109375 -9999 309.036943359375 317.23130859375 412.97443359375 396.4655859375 320.664462890625 321.262880859375 320.699970703125 320.1732421875 -9999 -9999 -9999 -9999 -9999 -9999 -9999 -9999 -9999 -9999 318.950830078125 319.198681640625 287.883193359375 286.199296875 327.190693359375 -9999 -9999 -9999 -9999 -9999 -9999 -9999 -9999 -9999 -9999 -9999 -9999 -9999 -9999 -9999 -9999 -9999 -9999 -9999 -9999 0.341641674041748 0.203224411010742 -9999 -9999 -9999 -9999 -9999 -9999 -9999 0.190310397148132 0.244745321273804 386.019638671875 357.830712890625 365.4476953125 373.500849609375 0.819612808227539 -9999 -9999 -9999 -9999 -9999 -9999 -9999 -9999 -9999 -9999 -9999 -9999 -9999 -9999 -9999 -9999 -9999 -9999 -9999 -9999 -9999 -9999 -9999 -9999 -9999 -9999 -9999 -9999 -9999 -9999 -9999 -9999 -9999 -9999 -9999 -9999 -9999 -9999 -9999 -9999 -9999 -9999 -9999 -9999 -9999 -9999 -9999 -9999 -9999 -9999 -9999 -9999 -9999 -9999 -9999 -9999 -9999 -9999 -9999 -9999 -9999 -9999 -9999 -9999 -9999 -9999 -9999 -9999 -9999 -9999 -9999 -9999 -9999
-9999 -9999 -9999 -9999 -9999 -9999 -9999 -9999 -9999 -9999 -9999 -9999 -9999 -9999 -9999 -9999 -9999 -9999 -9999 -9999 -9999 -9999 -9999 -9999 -9999 -9999 -9999 -9999 -9999 -9999 -9999 -9999 -9999 -9999 -9999 -9999 -9999 -9999 -9999 -9999 -9999 -9999 -9999 -9999 -9999 -9999 -9999 -9999 -9999 -9999 -9999 -9999 -9999 -9999 -9999 -9999 -9999 -9999 -9999 -9999 -9999 -9999 -9999 -9999 -9999 -9999 -9999 -9999 -9999 -9999 -9999 -9999 -9999 -9999 -9999 -9999 -9999 -9999 -9999 -9999 -9999 -9999 -9999 -9999 -9999 -9999 -9999 -9999 -9999 -9999 -9999 -9999 -9999 -9999 -9999 -9999 -9999 -9999 -9999 -9999 -9999 -9999 -9999 -9999 -9999 -9999 -9999 -9999 -9999 -9999 0.348983545303345 0.395059118270874 0.46225287437439 0.657445220947266 0.997183799743652 1.16266170501709 1.21830894470215 1.26509994506836 1.31376285552979 1.30416091918945 0.46540566444397 0.48028736114502 0.465382690429687 0.345044889450073 0.600751819610596 0.660396766662598 0.368268814086914 0.390518560409546 0.779911251068115 0.793319664001465 0.977835731506348 0.989968757629395 -9999 -9999 -9999 -9999 -9999 -9999 -9999 -9999 -9999 -9999 -9999 0.34129789352417 0.104064552783966 0.10304655790329 0.102928175926208 0.116591877937317 0.126762228012085 0.177324843406677 0.151141762733459 -9999 -9999 -9999 -9999 0.25910774230957 -9999 0.330986652374268 0.349146680831909 0.416244506835938 0.904133605957031 0.919941673278809 1.09122356414795 1.0703352355957 0.475894317626953 1.22093158721924 0.55070972442627 -9999 0.892545661926269 1.52558818817139 1.72118717193603 1.6581127166748 1.71491912841797 1.67206386566162 1.65478523254395 1.59359424591064 0.914768543243408 0.654608459472656 -9999 -9999 -9999 0.522580547332764 0.532372226715088 0.691185722351074 1.1594811630249 1.15552974700928 0.71865909576416 0.535434093475342 0.624344158172607 0.458201751708984 0.483411026000977 0.543815288543701 0.611761379241943 1.29778701782227 1.91599067687988 1.83778415679932 1.84079441070557 1.41659740447998 0.628140506744385 0.31667163848877 0.319519243240356 0.443577718734741 1.48199089050293 1.40101913452148 0.334686985015869 0.251592063903809 0.205641274452209 0.410763816833496 -9999 -9999 -9999 -9999 -9999 -9999 -9999 -9999 -9999 -9999 -9999 -9999 -9999 -9999 -9999 -9999 -9999 -9999 -9999 -9999 -9999 -9999 -9999 -9999 -9999 -9999 -9999 -9999 -9999 -9999 -9999 -9999 -9999 -9999 -9999 -9999 -9999 -9999 -9999 0.181871709823608 0.176003880500793 0.196236276626587 0.285370903015137 0.594562568664551 1.70350513458252 1.84358573913574 1.93461685180664 2.01636291503906 2.06992332458496 2.12857818603516 2.15654228210449 2.18336334228516 2.21865051269531 2.23019485473633 2.2419344329834 2.25307067871094 2.26129440307617 2.26820365905762 2.27820556640625 1.30075618743896 1.30305335998535 1.30435981750488 1.30595317840576 1.28824928283691 1.26019866943359 1.2613011932373 1.26328857421875 1.26466976165771 1.26570384979248 1.26666698455811 1.26754451751709 1.26799873352051 1.26870391845703 1.36848461151123 1.46919021606445 1.51682670593262 1.51678230285645 1.51689949035645 1.51592823028564 1.51530532836914 1.51429779052734 1.51393901824951 1.51252143859863 1.51101230621338 1.50621654510498 1.50491111755371 1.50422985076904 1.50054084777832 2.62567199707031 2.52506538391113 2.25069122314453 2.06073188781738 1.66595363616943 0.721609497070313 0.591645011901855 0.634943618774414 0.506078567504883 0.583637638092041 0.292782697677612 0.510115928649902 0.354504919052124 0.394070291519165 0.28900354385376 0.121094970703125 0.147815008163452 0.119522287845612 0.0907141900062561 0.0829231023788452 0.0907575917243958 0.0836994767189026 0.0807751750946045 -9999 -9999 -9999 -9999 -9999 -9999 -9999 -9999 -9999 -9999 -9999 -9999 -9999 -9999 -9999 -9999 -9999 -9999 -9999 -9999 -9999 -9999 -9999 -9999 -9999 -9999 -9999 -9999 -9999 -9999 -9999 -9999 -9999 -9999 -9999 -9999 -9999 -9999 -9999 -9999 -9999 -9999 -9999 -9999 -9999 -9999 -9999 -9999 -9999 -9999 -9999 -9999 -9999 -9999 -9999 -9999 -9999 -9999 -9999 -9999 -9999 -9999 -9999 -9999 -9999 -9999 -9999 -9999 -9999 -9999 -9999 -9999 -9999 -9999 -9999 -9999 -9999 -9999 -9999 -9999 -9999 -9999 -9999 -9999 -9999 -9999 -9999 -9999 -9999 -9999 -9999 -9999 -9999 -9999 -9999 -9999 -9999 -9999 -9999 -9999 -9999 -9999 -9999 -9999 -9999 -9999 -9999 -9999 -9999 -9999 -9999 -9999 -9999 -9999 -9999 -9999 -9999 -9999 -9999 -9999 -9999 -9999 -9999 -9999 -9999 -9999 -9999 -9999 -9999 -9999 -9999 -9999 -9999 -9999 -9999 -9999 -9999 -9999 -9999 -9999 -9999 -9999 -9999 -9999 -9999 -9999 -9999 0.196330919265747 44.6426110839844 0.987889251708984 0.370735330581665 0.475042219161987 0.451774063110352 3.25652114868164 47.41423828125 0.285192031860352 -9999 -9999 -9999 -9999 -9999 -9999 -9999 -9999 -9999 -9999 -9999 -9999 -9999 -9999 -9999 -9999 -9999 -9999 -9999 -9999 -9999 -9999 -9999 -9999 0.423346395492554 289.72318359375 290.157919921875 263.10181640625 0.268241586685181 -9999 -9999 -9999 -9999 0.233016114234924 0.246735363006592 0.59037712097168 0.57056001663208 0.272221527099609 -9999 -9999 -9999 -9999 -9999 0.313005409240723 -9999 0.296396055221558 0.291411180496216 0.292210521697998 0.304334077835083 0.314051342010498 0.337990465164185 0.382347965240478 0.575913677215576 0.960192260742187 1.92664627075195 77.4438940429688 155.614409179687 205.84705078125 214.285166015625 260.42314453125 305.953330078125 323.2744921875 308.617763671875 315.0202734375 325.167275390625 340.623837890625 348.421962890625 385.755791015625 364.02310546875 373.731123046875 379.41673828125 413.429765625 418.48037109375 424.297529296875 429.5792578125 432.15474609375 439.85302734375 438.151025390625 413.337333984375 418.02943359375 419.757890625 451.401591796875 455.31158203125 418.2887109375 420.04505859375 416.999326171875 416.715087890625 415.787314453125 410.747724609375 412.113369140625 404.32470703125 395.8398046875 387.610166015625 376.903857421875 365.142685546875 346.993798828125 331.54880859375 307.59216796875 296.161640625 291.654228515625 307.479873046875 294.897509765625 257.475205078125 255.303837890625 277.929404296875 276.62232421875 254.5897265625 260.5714453125 265.096376953125 269.034697265625 298.429658203125 287.107646484375 322.4905078125 441.153896484375 321.10025390625 318.882802734375 289.433759765625 290.408583984375 284.348701171875 282.847470703125 282.190693359375 293.6771484375 272.514609375 319.7673046875 303.555498046875 303.054697265625 -9999 -9999 -9999 -9999 -9999 308.070263671875 273.5330859375 280.90916015625 290.813525390625 310.13244140625 340.343642578125 394.899755859375 467.37474609375 601.3344140625 618.938223266602 591.36556640625 586.39634765625 507.84041015625 -9999 -9999 -9999 -9999 -9999 -9999 -9999 -9999 -9999 -9999 -9999 -9999 -9999 -9999 -9999 -9999 -9999 -9999 -9999 -9999 0.112979664802551 0.111435105800629 0.200032210350037 0.234960980415344 353.823369140625 365.333759765625 373.011826171875 381.654697265625 0.405612487792969 -9999 -9999 -9999 -9999 -9999 -9999 -9999 -9999 -9999 -9999 -9999 -9999 -9999 -9999 -9999 -9999 -9999 -9999 -9999 -9999 -9999 -9999 -9999 -9999 -9999 -9999 -9999 -9999 -9999 -9999 -9999 -9999 -9999 -9999 -9999 -9999 -9999 -9999 -9999 -9999 -9999 -9999 -9999 -9999 -9999 -9999 -9999 -9999 -9999 -9999 -9999 -9999 -9999 -9999 -9999 -9999 -9999 -9999 -9999 -9999 -9999 -9999 -9999 -9999 -9999 -9999 -9999 -9999 -9999 -9999 -9999 -9999
-9999 -9999 -9999 -9999 -9999 -9999 -9999 -9999 -9999 -9999 -9999 -9999 -9999 -9999 -9999 -9999 -9999 -9999 -9999 -9999 -9999 -9999 -9999 -9999 -9999 -9999 -9999 -9999 -9999 -9999 -9999 -9999 -9999 -9999 -9999 -9999 -9999 -9999 -9999 -9999 -9999 -9999 -9999 -9999 -9999 -9999 -9999 -9999 -9999 -9999 -9999 -9999 -9999 -9999 -9999 -9999 -9999 -9999 -9999 -9999 -9999 -9999 -9999 -9999 -9999 -9999 -9999 -9999 -9999 -9999 -9999 -9999 -9999 -9999 -9999 -9999 -9999 -9999 -9999 -9999 -9999 -9999 -9999 -9999 -9999 -9999 -9999 -9999 -9999 -9999 -9999 -9999 -9999 -9999 -9999 -9999 -9999 -9999 -9999 -9999 -9999 -9999 -9999 -9999 -9999 -9999 -9999 -9999 -9999 -9999 0.349823226928711 0.372425537109375 0.512776336669922 0.81866397857666 1.15909034729004 1.20106830596924 1.30012607574463 1.35533180236816 1.30818054199219 1.27296409606934 0.764105587005615 0.593116836547852 0.518228130340576 0.504794826507568 0.513167839050293 0.961871452331543 1.6221724319458 1.68696521759033 1.70357162475586 1.70892379760742 1.66524845123291 1.64520698547363 1.51407028198242 0.689065475463867 1.35110206604004 1.08887111663818 0.316731176376343 0.585831298828125 0.24193302154541 0.14554826259613 0.131985340118408 0.104017889499664 -9999 0.168750672340393 0.130080013275146 0.159978590011597 0.115266337394714 0.100353012084961 0.0942826151847839 0.0924429488182068 -9999 -9999 -9999 -9999 0.200699100494385 0.182465171813965 0.27988091468811 0.34002347946167 0.389093685150146 0.370780935287476 0.403156442642212 0.470853796005249 0.409069004058838 0.427243566513062 0.466620082855225 0.37078688621521 0.469096755981445 -9999 1.47209426879883 1.10243064880371 1.46004718780518 1.32354446411133 0.685549507141113 0.512932033538818 0.511172790527344 0.535068454742432 0.672840270996094 -9999 -9999 -9999 0.472490043640137 0.471060361862183 0.578116893768311 0.546294364929199 0.514595603942871 0.485096797943115 0.441759023666382 -9999 0.446793022155762 0.427243480682373 0.487758808135986 0.544142017364502 0.518901329040527 0.569260139465332 1.85933349609375 1.87944969177246 1.43439559936523 0.586038837432861 0.42957612991333 0.415770206451416 0.420076246261597 1.00704689025879 1.33683963775635 1.43952724456787 1.07122135162354 1.85250606536865 1.71790775299072 0.528787536621094 -9999 -9999 -9999 -9999 -9999 -9999 -9999 -9999 -9999 -9999 -9999 -9999 -9999 -9999 -9999 -9999 -9999 -9999 -9999 -9999 -9999 -9999 -9999 -9999 -9999 -9999 -9999 -9999 -9999 -9999 -9999 -9999 -9999 -9999 -9999 -9999 -9999 -9999 -9999 0.155083866119385 0.179254431724548 0.199141216278076 0.160901384353638 0.255164251327515 0.46240330696106 1.66784408569336 1.86942844390869 1.94121528625488 1.97934242248535 2.04018585205078 2.09181701660156 2.12694213867187 2.15074676513672 2.17058647155762 2.20646850585937 2.1421817779541 2.14901184082031 2.16069396972656 2.17579650878906 2.18302322387695 2.18761184692383 2.19112083435059 1.25221675872803 1.25370941162109 1.25543804168701 1.25637016296387 1.25818908691406 1.25976448059082 1.26102184295654 1.26199058532715 1.26266613006592 1.26279132843018 1.26378959655762 1.26388744354248 1.26483776092529 1.46417964935303 1.51534847259521 1.51524604797363 1.51389095306396 1.51358322143555 1.51182106018066 1.51137783050537 1.5104137802124 1.51022632598877 1.50675441741943 1.5055696105957 1.49748069763184 2.62531814575195 2.61052116394043 2.49752243041992 2.15679954528809 1.71023574829102 1.02171421051025 0.83237491607666 0.733475074768066 0.678244857788086 0.440059976577759 0.612168445587158 0.413442420959473 0.499418849945068 0.726427917480469 0.508140735626221 0.130480399131775 0.404350461959839 0.111043674945831 0.108102593421936 0.0961727857589722 0.0946517729759216 -9999 -9999 -9999 -9999 -9999 -9999 -9999 -9999 -9999 -9999 -9999 -9999 -9999 -9999 -9999 -9999 -9999 -9999 -9999 -9999 -9999 -9999 -9999 -9999 -9999 -9999 -9999 -9999 -9999 -9999 -9999 -9999 -9999 -9999 -9999 -9999 -9999 -9999 -9999 -9999 -9999 -9999 -9999 -9999 -9999 -9999 -9999 -9999 -9999 -9999 -9999 -9999 -9999 -9999 -9999 -9999 -9999 -9999 -9999 -9999 -9999 -9999 -9999 -9999 -9999 -9999 -9999 -9999 -9999 -9999 -9999 -9999 -9999 -9999 -9999 -9999 -9999 -9999 -9999 -9999 -9999 -9999 -9999 -9999 -9999 -9999 -9999 -9999 -9999 -9999 -9999 -9999 -9999 -9999 -9999 -9999 -9999 -9999 -9999 -9999 -9999 -9999 -9999 -9999 -9999 -9999 -9999 -9999 -9999 -9999 -9999 -9999 -9999 -9999 -9999 -9999 -9999 -9999 -9999 -9999 -9999 -9999 -9999 -9999 -9999 -9999 -9999 -9999 -9999 -9999 -9999 -9999 -9999 -9999 -9999 -9999 -9999 -9999 -9999 -9999 -9999 -9999 -9999 -9999 -9999 -9999 -9999 -9999 0.567143039703369 300.542314453125 26.9244268798828 10.7346954345703 1.26445838928223 6.4080647277832 39.7450964355469 67.3599389648437 0.615600414276123 -9999 -9999 -9999 -9999 -9999 -9999 -9999 -9999 -9999 -9999 -9999 -9999 -9999 -9999 -9999 -9999 -9999 -9999 -9999 -9999 -9999 -9999 -9999 -9999 -9999 344.936630859375 336.2192578125 328.54388671875 321.8366015625 313.70296875 292.074111328125 284.35283203125 0.327991762161255 -9999 -9999 0.33279444694519 0.297075204849243 143.33765625 0.272394161224365 -9999 -9999 -9999 0.308580522537231 -9999 0.38464038848877 0.586440181732178 -9999 -9999 0.463537931442261 0.381205530166626 0.330113010406494 0.357875890731812 0.409221496582031 0.778273601531982 5.83170639038086 105.666137695312 178.512744140625 212.478735351563 218.815883789062 264.37962890625 274.8896484375 288.3779296875 306.2996484375 321.878291015625 357.7700390625 371.021513671875 355.535859375 361.7839453125 366.2661328125 395.14798828125 398.47236328125 385.855048828125 392.093818359375 398.16837890625 402.4681640625 408.9540234375 406.523203125 413.967421875 408.053203125 408.837509765625 429.316640625 415.828916015625 411.627802734375 413.67345703125 413.41576171875 415.95779296875 436.07560546875 441.627919921875 436.129658203125 554.95810546875 438.5588671875 438.60966796875 403.227509765625 398.893974609375 427.81330078125 386.116728515625 413.29716796875 403.637783203125 356.103544921875 381.005595703125 367.54177734375 354.065859375 337.92978515625 316.11263671875 301.254755859375 266.747314453125 295.85267578125 300.78837890625 303.462216796875 315.002724609375 324.45685546875 303.80255859375 343.786552734375 344.908330078125 482.671845703125 366.330556640625 332.486572265625 345.689853515625 339.79611328125 330.223095703125 289.592373046875 280.465869140625 276.25611328125 272.79041015625 272.158974609375 272.99572265625 271.60693359375 271.836005859375 264.412001953125 269.367275390625 265.031689453125 282.6308203125 279.58078125 300.103798828125 400.545498046875 318.014736328125 342.032314453125 391.01794921875 434.328515625 457.480788574219 450.758952026367 595.968338012695 585.609351196289 459.424684753418 559.79255859375 628.5498046875 -9999 -9999 -9999 -9999 -9999 -9999 -9999 -9999 -9999 -9999 -9999 -9999 -9999 -9999 -9999 -9999 -9999 -9999 -9999 -9999 -9999 -9999 0.116426467895508 342.4754296875 348.144228515625 0.229871249198914 0.304206962585449 0.328407955169678 0.309460458755493 0.234234266281128 0.223274703025818 -9999 -9999 -9999 -9999 -9999 -9999 -9999 -9999 -9999 -9999 -9999 -9999 -9999 -9999 -9999 -9999 -9999 -9999 -9999 -9999 -9999 -9999 -9999 -9999 -9999 -9999 -9999 -9999 -9999 -9999 -9999 -9999 -9999 -9999 -9999 -9999 -9999 -9999 -9999 -9999 -9999 -9999 -9999 -9999 -9999 -9999 -9999 -9999 -9999 -9999 -9999 -9999 -9999 -9999 -9999 -9999 -9999 -9999 -9999 -9999 -9999 -9999 -9999 -9999 -9999 -9999 -9999 -9999 -9999 -9999
-9999 -9999 -9999 -9999 -9999 -9999 -9999 -9999 -9999 -9999 -9999 -9999 -9999 -9999 -9999 -9999 -9999 -9999 -9999 -9999 -9999 -9999 -9999 -9999 -9999 -9999 -9999 -9999 -9999 -9999 -9999 -9999 -9999 -9999 -9999 -9999 -9999 -9999 -9999 -9999 -9999 -9999 -9999 -9999 -9999 -9999 -9999 -9999 -9999 -9999 -9999 -9999 -9999 -9999 -9999 -9999 -9999 -9999 -9999 -9999 -9999 -9999 -9999 -9999 -9999 -9999 -9999 -9999 -9999 -9999 -9999 -9999 -9999 -9999 -9999 -9999 -9999 -9999 -9999 -9999 -9999 -9999 -9999 -9999 -9999 -9999 -9999 -9999 -9999 -9999 -9999 -9999 -9999 -9999 -9999 -9999 -9999 -9999 -9999 -9999 -9999 -9999 -9999 -9999 -9999 -9999 -9999 -9999 0.414340467453003 0.387475490570068 0.351167993545532 0.355784225463867 0.402876176834106 0.469978952407837 0.897138118743896 1.04020030975342 1.21600696563721 1.21963451385498 1.32304058074951 0.596548290252686 0.617068920135498 0.759771137237549 0.444021034240723 0.474040489196777 0.848507823944092 0.952880973815918 1.5539533996582 1.62701671600342 1.12309799194336 0.863594741821289 0.862307682037354 0.642006340026855 1.00407485961914 0.822426795959473 0.846609706878662 0.865138607025146 0.337798175811768 0.333634071350098 0.321883306503296 0.326774139404297 0.336585760116577 0.314776153564453 0.203544173240662 0.234782581329346 0.108859262466431 0.112154710292816 0.113900856971741 0.126456327438354 0.122158212661743 0.138064270019531 -9999 -9999 -9999 -9999 -9999 -9999 0.334212398529053 0.31027195930481 0.3247474193573 0.331373949050903 0.321767091751099 0.330512752532959 0.342745571136475 0.347019510269165 0.34660231590271 0.384773712158203 0.887946739196777 1.09420108795166 -9999 0.54709264755249 1.52961856842041 1.53458541870117 0.48320348739624 -9999 -9999 -9999 -9999 -9999 -9999 -9999 0.48766960144043 0.462752323150635 0.505179119110107 0.483009567260742 0.456958465576172 0.451129016876221 0.443724317550659 0.46915057182312 -9999 0.491955242156982 0.507290382385254 0.502838459014893 0.513956394195557 0.515785045623779 1.77177440643311 1.87988376617432 1.47045581817627 0.555909175872803 0.408659706115723 0.41412425994873 0.538206539154053 0.536784496307373 0.430136833190918 0.850025367736816 1.53746337890625 1.78579982757568 0.382170381546021 0.367479515075684 0.280411462783813 0.7481960105896 0.216547636985779 -9999 -9999 -9999 -9999 -9999 -9999 -9999 -9999 -9999 -9999 -9999 -9999 -9999 -9999 -9999 -9999 -9999 -9999 -9999 -9999 -9999 -9999 -9999 -9999 -9999 -9999 -9999 -9999 -9999 -9999 -9999 -9999 -9999 -9999 -9999 -9999 -9999 0.158381838798523 0.162551250457764 0.305558395385742 0.505656909942627 0.357555828094482 1.11609352111816 1.71654647827148 1.0914627456665 1.79328712463379 1.85809650421143 1.90275478363037 1.9685417175293 2.00446701049805 2.0423265838623 2.06954063415527 2.10692344665527 2.12241737365723 2.13370536804199 2.14667587280273 2.1607202911377 2.17309181213379 2.17776191711426 2.18261672973633 2.1873518371582 2.18910461425781 1.24975925445557 1.25172443389893 1.25380336761475 1.2571569442749 1.25790229797363 1.25985065460205 1.16124961853027 1.25970943450928 1.31822250366211 1.51199409484863 1.51345127105713 1.51349922180176 1.51339908599854 1.51158142089844 1.51119049072266 1.50893245697021 1.5082585144043 1.50633934020996 1.50549533843994 1.50181125640869 1.50043956756592 2.61766502380371 2.60996337890625 2.57568008422852 2.53579216003418 2.25345726013184 2.12409393310547 1.78368839263916 1.41492027282715 1.08140602111816 1.17788097381592 0.796660709381103 0.764867534637451 0.433608169555664 0.640219631195068 0.837871112823486 0.768611812591553 0.772198219299316 0.228508043289185 0.130736832618713 0.118232338428497 0.107574527263641 0.131298551559448 -9999 -9999 -9999 -9999 -9999 -9999 -9999 -9999 -9999 -9999 -9999 -9999 -9999 -9999 -9999 -9999 -9999 -9999 -9999 -9999 -9999 -9999 -9999 -9999 -9999 -9999 -9999 -9999 -9999 -9999 -9999 -9999 -9999 -9999 -9999 -9999 -9999 -9999 -9999 -9999 -9999 -9999 -9999 -9999 -9999 -9999 -9999 -9999 -9999 -9999 -9999 -9999 -9999 -9999 -9999 -9999 -9999 -9999 -9999 -9999 -9999 -9999 -9999 -9999 -9999 -9999 -9999 -9999 -9999 -9999 -9999 -9999 -9999 -9999 -9999 -9999 -9999 -9999 -9999 -9999 -9999 -9999 -9999 -9999 -9999 -9999 -9999 -9999 -9999 -9999 -9999 -9999 -9999 -9999 -9999 -9999 -9999 -9999 -9999 -9999 -9999 -9999 -9999 -9999 -9999 -9999 -9999 -9999 -9999 -9999 -9999 -9999 -9999 -9999 -9999 -9999 -9999 -9999 -9999 -9999 -9999 -9999 -9999 -9999 -9999 -9999 -9999 -9999 -9999 -9999 -9999 -9999 -9999 -9999 -9999 -9999 -9999 -9999 -9999 -9999 -9999 -9999 -9999 -9999 -9999 -9999 -9999 14.0782543945312 13.1996118164063 55.4576293945312 35.5705517578125 16.1503601074219 3.28977310180664 47.4280151367187 78.320419921875 67.3262475585937 -9999 -9999 -9999 -9999 -9999 -9999 -9999 -9999 -9999 -9999 -9999 -9999 -9999 -9999 -9999 -9999 -9999 -9999 -9999 -9999 -9999 -9999 -9999 -9999 -9999 375.0017578125 363.004013671875 359.89400390625 352.41498046875 346.358173828125 340.354658203125 314.121416015625 321.458408203125 335.049638671875 -9999 -9999 -9999 2.62488830566406 210.231767578125 0.882846851348877 -9999 2.48117408752441 0.935176219940186 65.7069799804687 13.3037411499023 6.16680084228516 3.56616256713867 1.90262031555176 3.50303672790527 8.02953369140625 5.69672241210937 1.80330047607422 74.9333715820312 77.5079370117188 108.259716796875 169.63283203125 232.162353515625 267.188701171875 269.8013671875 282.1243359375 293.55521484375 309.514541015625 313.17919921875 320.9934375 333.492568359375 345.24533203125 356.919814453125 361.943671875 369.15263671875 378.74302734375 382.803310546875 383.49193359375 390.9975 398.275986328125 397.24171875 401.52515625 405.165498046875 402.87333984375 404.04169921875 409.30669921875 409.532109375 409.965439453125 403.28208984375 405.549814453125 403.8380859375 403.33564453125 408.005068359375 424.630576171875 433.051875 399.582421875 430.18611328125 435.080361328125 433.95849609375 550.4325 545.4590625 424.698955078125 431.509248046875 423.65912109375 423.372451171875 381.835546875 378.7674609375 368.996484375 365.20130859375 386.237138671875 334.2301171875 312.321796875 302.950927734375 299.275224609375 331.078447265625 310.34455078125 319.3276171875 326.1720703125 326.527470703125 329.665458984375 331.245380859375 367.128193359375 371.25392578125 369.0791015625 358.827919921875 351.77021484375 345.355927734375 331.55091796875 323.346005859375 312.10939453125 306.245947265625 268.913466796875 264.883974609375 259.3965234375 263.85234375 277.06435546875 261.685283203125 260.907216796875 268.549072265625 275.828203125 284.847333984375 325.299814453125 378.08953125 424.50380859375 464.6260546875 452.5228125 446.056300964355 579.916428222656 437.896958312988 436.449572753906 410.878309020996 439.224249572754 480.54568359375 -9999 -9999 -9999 -9999 -9999 -9999 -9999 -9999 -9999 -9999 -9999 -9999 -9999 -9999 -9999 -9999 -9999 -9999 -9999 0.785863838195801 347.177109375 363.319189453125 379.671416015625 337.5703125 346.85150390625 349.574619140625 361.0098046875 365.8107421875 376.26005859375 379.201201171875 390.80267578125 402.223916015625 407.94099609375 414.864814453125 425.618408203125 433.376484375 436.844677734375 440.079404296875 439.759189453125 369.643857421875 399.555263671875 -9999 -9999 -9999 -9999 -9999 -9999 -9999 -9999 -9999 -9999 -9999 -9999 -9999 -9999 -9999 -9999 -9999 -9999 -9999 -9999 -9999 -9999 -9999 -9999 -9999 -9999 -9999 -9999 -9999 -9999 -9999 -9999 -9999 -9999 -9999 -9999 -9999 -9999 -9999 -9999 -9999 -9999 -9999 -9999 -9999 -9999 -9999 -9999 -9999 -9999 -9999 -9999 -9999 -9999 -9999 -9999 -9999 -9999 -9999 -9999
-9999 0.711708984375 -9999 -9999 -9999 -9999 -9999 -9999 -9999 -9999 -9999 -9999 -9999 -9999 -9999 -9999 -9999 -9999 -9999 -9999 -9999 -9999 -9999 -9999 -9999 -9999 -9999 -9999 -9999 -9999 -9999 -9999 -9999 -9999 -9999 -9999 -9999 -9999 -9999 -9999 -9999 -9999 -9999 -9999 -9999 -9999 -9999 -9999 -9999 -9999 -9999 -9999 -9999 -9999 -9999 -9999 -9999 -9999 -9999 -9999 -9999 -9999 -9999 -9999 -9999 -9999 -9999 -9999 -9999 -9999 -9999 -9999 -9999 -9999 -9999 -9999 -9999 -9999 -9999 -9999 -9999 -9999 -9999 -9999 -9999 -9999 -9999 -9999 -9999 -9999 -9999 -9999 -9999 -9999 -9999 -9999 -9999 -9999 -9999 -9999 -9999 -9999 -9999 -9999 -9999 -9999 -9999 -9999 0.643684272766113 0.47828667640686 0.391669435501099 0.245200395584106 0.235036783218384 0.809815292358398 1.09714805603027 1.30712837219238 0.73784236907959 0.67464729309082 0.408291177749634 0.463962593078613 -9999 0.435985450744629 0.440828075408936 0.482067432403564 0.484713478088379 0.365481863021851 0.313280439376831 0.326253976821899 0.347927141189575 0.382870759963989 0.389252843856812 0.394112749099731 0.395511617660522 0.387641515731811 0.452187967300415 0.443027944564819 0.38171745300293 0.359301109313965 0.383784484863281 0.364898300170898 0.348370113372803 0.330902194976807 0.283230972290039 0.275191354751587 0.275013399124146 0.277628231048584 0.275142631530762 0.27232855796814 0.270188798904419 0.263181180953979 0.263955459594727 -9999 -9999 -9999 -9999 -9999 -9999 -9999 -9999 0.330486745834351 0.344379615783691 0.379918413162231 0.381995687484741 0.366846771240234 0.364498043060303 0.345974435806274 0.563602752685547 -9999 0.792318878173828 1.1924439239502 1.69458766937256 0.643976211547852 0.51340913772583 -9999 -9999 -9999 -9999 -9999 -9999 0.556465129852295 0.502528495788574 0.471106767654419 0.462580833435059 0.456076183319092 0.445862817764282 0.443206872940063 0.439129028320312 0.460498466491699 0.518848114013672 0.528639678955078 0.502770538330078 0.492374954223633 0.487165260314941 0.521013622283936 0.567245693206787 0.590184345245361 0.512263069152832 0.419645519256592 0.421958484649658 0.456999521255493 0.439454526901245 0.445864219665527 0.513223628997803 0.542477302551269 1.54501579284668 1.70391780853271 1.7668180847168 1.67174880981445 0.281978702545166 0.29203911781311 0.220821933746338 0.39935131072998 0.215135922431946 -9999 1.43590679168701 1.52729381561279 -9999 -9999 -9999 -9999 -9999 -9999 -9999 -9999 -9999 -9999 -9999 -9999 -9999 -9999 -9999 -9999 -9999 -9999 -9999 -9999 -9999 -9999 -9999 -9999 -9999 -9999 -9999 -9999 -9999 -9999 -9999 -9999 0.165568571090698 0.197129030227661 0.497620239257812 1.00246593475342 0.227504911422729 0.239863200187683 0.297004251480103 0.483794059753418 0.539840698242188 0.653338279724121 1.43023212432861 1.76669311523438 1.88276149749756 1.93174003601074 1.99452507019043 1.95637138366699 1.99977424621582 2.08903587341309 2.10297317504883 2.11847305297852 2.13600402832031 2.14659210205078 2.15966285705566 2.1678108215332 2.17287002563477 2.17907913208008 2.18214569091797 2.18757453918457 1.20266544342041 1.29308074951172 1.25308902740479 1.34433563232422 1.50024593353271 1.5004190826416 1.50456275939941 1.50439453125 1.50672477722168 1.50633224487305 1.50815769195557 1.50762302398682 1.50670475006104 1.50376808166504 1.50286285400391 1.50000995635986 2.62909606933594 2.62314628601074 2.61636840820313 2.59555938720703 2.56720367431641 2.51376045227051 2.42439239501953 2.20367340087891 2.02201927185059 1.62881973266602 1.79941864013672 0.870761661529541 1.29931732177734 1.26313419342041 1.46663166046143 1.16897701263428 1.34194255828857 1.09555171966553 0.395250377655029 0.508837909698486 0.172525262832642 0.148987898826599 0.138656144142151 0.135667319297791 0.154397535324097 -9999 -9999 -9999 -9999 -9999 -9999 -9999 -9999 -9999 -9999 -9999 -9999 -9999 -9999 -9999 -9999 -9999 -9999 -9999 -9999 -9999 -9999 -9999 -9999 -9999 -9999 -9999 -9999 -9999 -9999 -9999 -9999 -9999 -9999 -9999 -9999 -9999 -9999 -9999 -9999 -9999 -9999 -9999 -9999 -9999 -9999 -9999 -9999 -9999 -9999 -9999 -9999 -9999 -9999 -9999 -9999 -9999 -9999 -9999 -9999 -9999 -9999 -9999 -9999 -9999 -9999 -9999 -9999 -9999 -9999 -9999 -9999 -9999 -9999 -9999 -9999 -9999 -9999 -9999 -9999 -9999 -9999 -9999 -9999 -9999 -9999 -9999 -9999 -9999 -9999 -9999 -9999 -9999 -9999 -9999 -9999 -9999 -9999 -9999 -9999 -9999 -9999 -9999 -9999 -9999 -9999 -9999 -9999 -9999 -9999 -9999 -9999 -9999 -9999 -9999 -9999 -9999 -9999 -9999 -9999 -9999 -9999 -9999 -9999 -9999 -9999 -9999 -9999 -9999 -9999 -9999 -9999 -9999 -9999 -9999 -9999 -9999 -9999 -9999 -9999 -9999 -9999 -9999 -9999 -9999 109.808327636719 337.218896484375 333.082060546875 57.7765502929688 56.8680688476562 51.1051135253906 66.7665747070313 76.5751538085938 356.372548828125 161.85990234375 -9999 -9999 -9999 -9999 -9999 -9999 -9999 -9999 -9999 -9999 -9999 -9999 -9999 -9999 -9999 -9999 -9999 -9999 -9999 -9999 -9999 -9999 -9999 -9999 372.2907421875 372.852802734375 373.818984375 373.48611328125 372.688505859375 373.437890625 369.195498046875 362.879677734375 365.40515625 9.23690368652344 50.9815869140625 320.218271484375 318.640166015625 279.927275390625 296.910703125 -9999 226.514458007812 198.16974609375 185.71845703125 177.00134765625 144.491645507813 94.0791650390625 73.6178759765625 57.4041870117187 132.471254882813 144.517880859375 169.87798828125 193.890263671875 205.921025390625 226.66494140625 233.023813476562 251.781416015625 266.152587890625 292.1825390625 291.336533203125 298.172783203125 311.6858203125 343.257890625 348.783310546875 356.950576171875 355.87962890625 361.390986328125 361.658349609375 374.360068359375 471.959560546875 373.047421875 377.3016796875 384.406845703125 389.909560546875 393.549111328125 394.292490234375 399.304013671875 399.611162109375 396.36052734375 398.1420703125 402.21140625 396.885146484375 395.51009765625 392.40134765625 388.78921875 390.0196875 408.01212890625 408.99357421875 422.56283203125 419.606396484375 419.525302734375 422.87162109375 529.9908984375 534.51146484375 428.215166015625 432.42521484375 433.922197265625 411.050537109375 410.208544921875 408.230419921875 409.1546484375 405.750498046875 401.253984375 391.69541015625 416.708994140625 372.153310546875 364.33341796875 352.5479296875 493.97419921875 376.527509765625 340.127841796875 338.3056640625 344.66771484375 345.921943359375 368.5308984375 401.948408203125 402.480146484375 502.5769921875 492.05244140625 371.2415625 334.469912109375 328.605234375 316.99998046875 316.336904296875 301.276259765625 323.706591796875 286.282734375 275.929130859375 268.4637890625 259.86884765625 259.953486328125 263.04791015625 303.15861328125 336.995537109375 370.57177734375 521.68904296875 589.868695678711 602.375603027344 432.66429107666 450.543386535645 496.1428125 495.504365844727 465.954612121582 426.122611083984 430.212796325684 474.51061340332 410.433522033691 476.427216796875 -9999 -9999 -9999 -9999 -9999 410.172861328125 317.810390625 398.8447265625 -9999 -9999 -9999 -9999 514.05767578125 509.75935546875 -9999 483.902314453125 447.10095703125 380.702109375 320.076591796875 -9999 426.97482421875 439.04677734375 379.94337890625 368.42853515625 354.960556640625 394.42921875 404.778896484375 414.755185546875 430.9941796875 438.9064453125 447.31125 461.205146484375 429.65185546875 436.44052734375 438.0683203125 445.28724609375 448.170703125 449.65236328125 443.787568359375 433.5687890625 420.40845703125 460.39013671875 -9999 -9999 -9999 -9999 -9999 -9999 -9999 -9999 -9999 -9999 -9999 -9999 -9999 -9999 -9999 -9999 -9999 -9999 -9999 -9999 -9999 -9999 -9999 -9999 -9999 -9999 -9999 -9999 -9999 -9999 -9999 -9999 -9999 -9999 -9999 -9999 -9999 -9999 -9999 -9999 -9999 -9999 -9999 -9999 -9999 -9999 -9999 -9999 -9999 -9999 -9999 -9999 -9999 -9999 -9999 -9999 -9999 -9999 -9999
1.1661092376709 1.27174736022949 1.21942348480225 1.02707256317139 0.509494743347168 -9999 -9999 -9999 -9999 -9999 -9999 -9999 -9999 -9999 -9999 -9999 -9999 -9999 -9999 -9999 -9999 -9999 -9999 -9999 -9999 -9999 -9999 -9999 -9999 -9999 -9999 -9999 -9999 -9999 -9999 -9999 -9999 -9999 -9999 -9999 -9999 -9999 -9999 -9999 -9999 0.219408144950867 0.262041549682617 0.251654577255249 0.265872344970703 0.3127942943573 0.420761661529541 -9999 -9999 -9999 -9999 -9999 -9999 -9999 -9999 -9999 -9999 -9999 -9999 -9999 -9999 -9999 -9999 -9999 -9999 -9999 -9999 -9999 -9999 -9999 -9999 -9999 -9999 -9999 -9999 -9999 -9999 -9999 -9999 -9999 -9999 -9999 -9999 -9999 -9999 -9999 -9999 -9999 -9999 -9999 -9999 -9999 -9999 -9999 -9999 -9999 -9999 -9999 -9999 -9999 -9999 -9999 -9999 -9999 -9999 -9999 -9999 -9999 0.411136293411255 0.344730377197266 0.387058582305908 0.357492341995239 0.360660552978516 0.41012864112854 0.40048041343689 -9999 -9999 -9999 -9999 0.258640651702881 0.265837755203247 0.263656167984009 0.266993894577026 0.272947969436646 0.313306131362915 0.331601858139038 0.321169481277466 0.314784135818481 0.323098783493042 0.325375728607178 0.384325904846191 0.545112648010254 0.507240715026855 0.551201248168945 0.4273473072052 0.313308305740356 0.246474666595459 0.229588308334351 0.252041845321655 0.290225658416748 0.289774503707886 0.302689590454102 0.288807106018066 0.272732763290405 0.281016597747803 0.282515916824341 0.280709209442139 0.308443450927734 -9999 -9999 -9999 -9999 -9999 -9999 -9999 -9999 -9999 0.356095418930054 0.359537315368652 0.356238412857056 -9999 -9999 -9999 0.408325939178467 1.0889864730835 1.27639434814453 1.29206783294678 1.19662994384766 0.561904850006103 0.491135845184326 -9999 -9999 -9999 -9999 -9999 -9999 0.536770420074463 0.568577041625977 0.551890640258789 0.542032356262207 0.535613708496094 0.479890937805176 0.486543846130371 0.525425033569336 0.539460697174072 0.58155143737793 0.621744232177734 0.542592544555664 0.525894870758057 0.50683874130249 0.500202198028564 0.543324909210205 0.581349391937256 0.588411140441894 1.73501678466797 0.396190195083618 0.394633769989014 0.403164367675781 0.419840698242188 0.47797345161438 1.19860290527344 1.55194644927979 1.64353019714355 1.60462337493896 1.44395576477051 0.787036113739014 0.468162460327148 0.430506191253662 0.506759090423584 0.57042142868042 1.44559719085693 0.303449478149414 0.497348213195801 0.4157164478302 -9999 -9999 -9999 -9999 -9999 -9999 -9999 -9999 -9999 -9999 -9999 -9999 -9999 -9999 -9999 -9999 -9999 -9999 -9999 -9999 -9999 -9999 -9999 -9999 -9999 -9999 -9999 -9999 -9999 -9999 -9999 0.172064595222473 0.211974520683289 0.204849157333374 0.179605994224548 0.183476014137268 0.210483226776123 0.236145000457764 0.231920485496521 0.335267887115479 0.323317394256592 1.33614944458008 1.62866798400879 1.77266567230225 1.86900661468506 1.9490943145752 1.99071350097656 2.03929756164551 2.14029350280762 2.31398620605469 2.33379638671875 2.36196578979492 2.37875312805176 2.39353088378906 2.40725601196289 2.41549301147461 2.42168952941895 2.51503715515137 2.52409606933594 2.44474685668945 2.62390296936035 2.6286710357666 2.62146148681641 2.62106071472168 2.62999809265137 2.62947692871094 1.49955791473389 1.50050903320313 1.5024870300293 1.50180599212646 1.50071571350098 2.62859115600586 2.62682235717773 2.62109893798828 2.61515098571777 2.60752418518066 2.60028167724609 2.58252639770508 2.55365707397461 2.49031768798828 2.38062492370605 2.30602180480957 2.27527519226074 1.91225921630859 2.08150451660156 0.476871385574341 1.40459587097168 1.87789066314697 1.64492809295654 1.52972442626953 0.215550227165222 0.181674613952637 0.135189127922058 0.146470527648926 0.153073282241821 0.159318079948425 0.196728129386902 0.151385793685913 0.131899180412292 -9999 -9999 -9999 -9999 -9999 -9999 -9999 -9999 -9999 -9999 -9999 -9999 -9999 -9999 -9999 -9999 -9999 -9999 -9999 -9999 -9999 -9999 -9999 -9999 -9999 -9999 0.101038046181202 -9999 -9999 -9999 -9999 -9999 -9999 -9999 -9999 -9999 -9999 -9999 -9999 -9999 -9999 -9999 -9999 -9999 -9999 -9999 -9999 -9999 -9999 -9999 -9999 -9999 -9999 -9999 -9999 -9999 -9999 -9999 -9999 -9999 -9999 -9999 -9999 -9999 -9999 -9999 -9999 -9999 -9999 -9999 -9999 -9999 -9999 -9999 -9999 -9999 -9999 -9999 -9999 -9999 -9999 -9999 -9999 -9999 -9999 -9999 -9999 -9999 -9999 -9999 -9999 -9999 -9999 156.336659088135 171.392405548096 -9999 -9999 -9999 322.703482666016 -9999 -9999 -9999 -9999 -9999 -9999 -9999 -9999 -9999 -9999 -9999 -9999 -9999 -9999 -9999 -9999 -9999 -9999 -9999 -9999 -9999 -9999 -9999 -9999 -9999 -9999 -9999 -9999 -9999 -9999 -9999 -9999 -9999 -9999 -9999 -9999 -9999 -9999 -9999 -9999 -9999 -9999 -9999 -9999 -9999 -9999 -9999 164.481708984375 179.424565429688 352.002275390625 353.166474609375 73.456318359375 77.16275390625 340.971181640625 343.93880859375 341.05658203125 328.718466796875 -9999 -9999 -9999 -9999 -9999 -9999 -9999 -9999 -9999 -9999 -9999 -9999 -9999 -9999 -9999 -9999 -9999 -9999 -9999 -9999 304.27623046875 367.45974609375 365.888994140625 365.045244140625 367.250009765625 367.466923828125 369.652705078125 347.583251953125 373.17826171875 375.04828125 374.467412109375 378.2865234375 175.229985351563 165.096723632812 360.686484375 344.53517578125 326.9138671875 332.830751953125 322.535625 166.609672851562 276.621767578125 257.11119140625 252.359736328125 234.47607421875 215.330712890625 195.0317578125 184.96763671875 208.961791992188 217.676455078125 225.6387890625 235.753447265625 255.48486328125 280.61302734375 296.14728515625 278.52708984375 289.1443359375 300.472119140625 311.91134765625 326.583720703125 325.9894921875 336.8278125 342.558310546875 350.28791015625 360.1316015625 364.894599609375 368.1984375 369.043623046875 369.307705078125 379.772548828125 383.3152734375 384.6500390625 382.194404296875 381.73189453125 388.096552734375 388.1792578125 389.64791015625 385.53662109375 379.664970703125 380.165888671875 378.547734375 388.7840625 396.06064453125 374.564501953125 390.604775390625 394.85982421875 394.01982421875 399.826904296875 406.2390234375 406.34759765625 414.82318359375 418.470205078125 402.16517578125 397.013642578125 439.969716796875 401.155693359375 408.813310546875 411.552451171875 413.20921875 413.56904296875 417.538798828125 412.974609375 412.226162109375 409.852822265625 409.8266015625 407.723701171875 434.639501953125 566.38599609375 403.766162109375 400.563955078125 377.281201171875 371.12373046875 367.53123046875 377.633115234375 385.5346875 376.15125 385.842392578125 524.175234375 513.38033203125 753.86935546875 502.67701171875 499.871953125 493.3801171875 481.809814453125 369.626484375 451.98978515625 424.422421875 396.26548828125 372.81720703125 306.340458984375 322.235419921875 404.726396484375 459.869773864746 67.1897827148437 66.9007397460937 462.709195861816 60.2204699707031 469.878447875977 423.370200805664 451.424984436035 478.659462890625 442.682451782227 53.7480688476562 621.395700073242 485.713825378418 414.323368835449 405.171337280273 463.854814453125 -9999 -9999 -9999 588.49623046875 490.1775 334.773193359375 330.548583984375 348.914091796875 410.36021484375 420.95595703125 442.19974822998 592.01716003418 596.917430419922 459.421663513184 452.071560058594 457.629886779785 467.355500793457 430.588759460449 444.415737304687 490.286230773926 674.86198425293 532.122703857422 537.255126342773 516.33158203125 473.56248046875 442.965146484375 447.403037109375 454.4743359375 465.105791015625 470.07041015625 477.139541015625 439.188193359375 442.68375 443.02541015625 444.968583984375 443.754814453125 444.33439453125 442.377392578125 430.093037109375 423.650595703125 452.8444921875 431.859697265625 418.153564453125 397.16044921875 -9999 -9999 -9999 -9999 -9999 -9999 -9999 384.129375 375.91529296875 349.174775390625 225.241201171875 -9999 -9999 -9999 -9999 -9999 -9999 -9999 -9999 -9999 -9999 -9999 -9999 -9999 -9999 -9999 -9999 -9999 -9999 -9999 -9999 -9999 -9999 -9999 -9999 -9999 -9999 -9999 -9999 -9999 -9999 -9999 -9999 -9999 -9999 -9999 -9999 -9999 -9999 -9999 -9999 -9999 -9999 0.601615219116211 0.285892667770386 1.09387939453125
0.178400702476501 0.190158319473267 0.2074666929245 1.08042274475098 -9999 -9999 -9999 -9999 -9999 -9999 -9999 -9999 -9999 -9999 -9999 -9999 -9999 -9999 -9999 -9999 -9999 -9999 -9999 -9999 -9999 -9999 -9999 -9999 -9999 -9999 -9999 -9999 -9999 -9999 -9999 -9999 -9999 -9999 -9999 1.59128322601318 0.420512609481812 0.351553430557251 0.277279815673828 0.293148651123047 0.235590233802795 0.251732139587402 0.250654335021973 0.288162603378296 0.501273651123047 7.62765151977539 75.4391381835937 261.322177734375 154.6376953125 373.63353515625 395.510478515625 325.858125 -9999 -9999 -9999 -9999 -9999 -9999 -9999 -9999 -9999 -9999 -9999 -9999 -9999 -9999 -9999 -9999 -9999 -9999 -9999 -9999 -9999 -9999 -9999 -9999 -9999 -9999 -9999 -9999 -9999 -9999 -9999 -9999 -9999 -9999 -9999 -9999 -9999 -9999 -9999 -9999 -9999 -9999 -9999 -9999 -9999 -9999 -9999 210.71296875 -9999 -9999 -9999 -9999 -9999 -9999 -9999 -9999 -9999 -9999 -9999 -9999 -9999 -9999 -9999 -9999 -9999 -9999 -9999 0.246628675460815 0.306805257797241 0.439669961929321 0.450396852493286 0.456653966903686 0.460248184204102 0.468273410797119 0.475573253631592 0.469692707061768 0.477519092559814 0.485231094360352 0.473753700256348 0.477846622467041 0.487565231323242 0.327244520187378 0.238600087165833 0.176067681312561 0.192516388893127 0.229174733161926 0.295099582672119 0.397836513519287 0.39761830329895 0.393511905670166 0.421453313827515 0.378565464019775 0.353425912857056 0.316290292739868 0.285894870758057 0.262810478210449 0.270243272781372 0.248506450653076 0.235412921905518 -9999 -9999 -9999 0.282297992706299 0.304307584762573 -9999 -9999 -9999 -9999 -9999 -9999 0.359131507873535 0.356084976196289 0.400716791152954 0.652917423248291 0.742154216766357 0.835284175872803 0.772856369018555 0.540618953704834 0.509109077453613 0.4972096824646 -9999 -9999 -9999 -9999 -9999 0.508335857391357 0.754942646026611 0.712378807067871 0.688779201507568 0.807864646911621 0.766268634796143 0.677577781677246 0.699067783355713 0.694632339477539 0.635011253356934 0.563197746276855 0.523231201171875 0.513442554473877 0.497442111968994 0.489886951446533 0.475734729766846 0.466708173751831 0.467132635116577 0.463697834014893 0.46817699432373 0.453481950759888 0.398266983032227 0.403314056396484 0.52266580581665 0.677572746276855 0.49445629119873 0.945389385223389 1.70581649780273 1.89373695373535 2.03445602416992 2.07583145141602 2.03790458679199 2.00224411010742 1.8067414855957 0.595576171875 0.429331226348877 2.07921226501465 0.477984981536865 0.470556507110596 0.477883958816528 0.476692085266113 0.745860900878906 -9999 -9999 -9999 -9999 -9999 -9999 -9999 -9999 -9999 -9999 -9999 -9999 -9999 -9999 -9999 -9999 -9999 -9999 -9999 -9999 -9999 -9999 -9999 -9999 -9999 -9999 -9999 57.1130895996094 0.187579565048218 0.372553567886353 0.330969114303589 0.241874313354492 0.205149250030518 0.180834131240845 0.184524836540222 0.213700189590454 0.384931640625 0.967870445251465 1.92416954040527 2.10553688049316 2.20410552978516 2.28451835632324 2.33364074707031 2.3784400177002 2.41709129333496 2.44962089538574 2.47589241027832 2.50068054199219 2.52552360534668 2.53738288879395 2.55189788818359 2.56576240539551 2.57422508239746 2.58323593139648 2.58803512573242 2.60310859680176 2.60839622497559 2.60959053039551 2.61739242553711 2.62489654541016 2.62946434020996 2.62676559448242 2.62616203308105 2.62521949768066 2.6245484161377 2.6220531463623 2.6186540222168 2.61249732971191 2.59911026000977 2.58422492980957 2.58116157531738 2.56653511047363 2.54511039733887 2.50288604736328 2.4297095489502 2.24786476135254 1.99805305480957 1.87274562835693 2.12906135559082 2.03572929382324 0.507329635620117 0.925893287658691 1.02109130859375 0.529482192993164 0.348153476715088 0.429913215637207 0.169959311485291 -9999 0.175359020233154 0.158227286338806 0.172699627876282 0.170591568946838 0.187051892280579 0.161471285820007 -9999 -9999 -9999 -9999 -9999 -9999 -9999 -9999 -9999 -9999 -9999 -9999 -9999 -9999 -9999 -9999 -9999 -9999 -9999 -9999 -9999 -9999 -9999 -9999 -9999 0.0924506857991219 0.0910375118255615 -9999 -9999 -9999 -9999 -9999 -9999 -9999 -9999 -9999 -9999 -9999 -9999 -9999 -9999 -9999 -9999 -9999 -9999 -9999 -9999 -9999 -9999 -9999 -9999 -9999 -9999 -9999 -9999 -9999 -9999 -9999 -9999 -9999 -9999 -9999 -9999 -9999 -9999 -9999 -9999 -9999 -9999 -9999 -9999 -9999 -9999 -9999 -9999 -9999 -9999 -9999 -9999 -9999 -9999 -9999 -9999 -9999 -9999 -9999 -9999 341.599149169922 218.026049804687 326.604619445801 329.033122558594 335.078291931152 360.380786132812 352.737652587891 328.754987182617 346.029804382324 333.433528747559 336.292286682129 409.681888427734 403.172889404297 273.954493103027 253.886811218262 162.004007263184 311.856533203125 -9999 -9999 -9999 -9999 -9999 -9999 -9999 -9999 -9999 -9999 -9999 -9999 -9999 -9999 -9999 -9999 -9999 -9999 -9999 -9999 -9999 -9999 -9999 -9999 -9999 -9999 -9999 -9999 -9999 -9999 -9999 -9999 -9999 -9999 -9999 -9999 -9999 -9999 -9999 -9999 -9999 -9999 -9999 -9999 -9999 -9999 267.547734375 341.741953125 328.3658203125 320.49556640625 316.48388671875 320.076005859375 343.72119140625 318.564931640625 -9999 -9999 -9999 -9999 -9999 -9999 -9999 -9999 -9999 -9999 -9999 -9999 -9999 -9999 -9999 -9999 -9999 -9999 336.143291015625 357.834228515625 357.19541015625 357.09591796875 359.82638671875 335.6337890625 339.775224609375 341.783642578125 366.768017578125 369.785390625 371.135419921875 375.04078125 375.32103515625 -9999 227.44142578125 350.892333984375 344.291044921875 332.075244140625 324.311103515625 309.515361328125 299.361357421875 305.095546875 300.8975390625 281.943955078125 264.67962890625 257.15513671875 253.1312109375 268.486552734375 270.654111328125 295.61255859375 302.967919921875 305.978818359375 379.07888671875 383.93806640625 306.456416015625 314.504267578125 320.8541015625 334.305791015625 340.464580078125 352.071181640625 356.560048828125 360.19875 364.606142578125 370.94431640625 380.1633984375 379.698251953125 380.5001953125 381.745517578125 385.4204296875 385.859443359375 384.409248046875 390.138310546875 394.8331640625 395.31087890625 396.15873046875 393.238212890625 400.872041015625 394.16185546875 384.737873840332 377.663349609375 382.119818115234 376.008423156738 371.989690246582 394.348952636719 394.807529296875 375.7093359375 396.475810546875 403.522880859375 432.322119140625 414.492685546875 431.01673828125 422.033466796875 434.977705078125 441.94552734375 437.2566796875 434.20453125 447.12234375 419.438173828125 419.55615234375 425.03748046875 429.5576953125 436.371650390625 439.582294921875 448.934150390625 487.98849609375 617.90162109375 470.53810546875 617.23880859375 471.765 434.629130859375 444.6028125 414.425859375 524.7289453125 421.113486328125 386.955524597168 387.442155761719 397.087646484375 424.60984588623 522.1852734375 553.596954345703 548.904375 540.93451171875 535.18236328125 528.01400390625 535.14521484375 530.863330078125 517.98146484375 508.50462890625 545.705595703125 420.509297790527 418.90199798584 400.426328430176 72.1753491210937 435.37479675293 442.662723083496 429.331832885742 397.968247375488 396.469833068848 397.488021240234 405.375573120117 404.854409179687 399.172060546875 421.684590454102 685.11146484375 697.530703125 461.100294799805 425.174364624023 444.148478393555 394.531133422852 374.646327209473 364.679225463867 370.146673278809 375.259518127441 431.395491027832 440.759069824219 420.438812255859 423.556822814941 411.511138000488 455.722759094238 453.353139953613 402.754526367188 410.994324645996 409.811297607422 413.445698547363 419.673622741699 471.036247558594 482.643218078613 485.549892883301 460.030836181641 468.01618560791 477.28015411377 519.392406005859 527.3108203125 511.75623046875 489.9922265625 488.39666015625 441.396884765625 489.77619140625 489.1334765625 491.6982421875 489.604892578125 484.3353515625 480.77478515625 481.1126953125 489.705703125 447.437666015625 472.134609375 452.768671875 436.254140625 415.809638671875 394.029287109375 367.089169921875 353.95212890625 338.7050390625 330.882890625 325.881474609375 322.380439453125 333.88599609375 337.857158203125 336.573251953125 336.824326171875 338.51361328125 345.514921875 341.7805078125 338.211943359375 337.04203125 0.33807297706604 -9999 -9999 -9999 -9999 0.197202401161194 -9999 -9999 -9999 -9999 -9999 -9999 -9999 -9999 -9999 -9999 -9999 -9999 -9999 -9999 -9999 -9999 -9999 -9999 -9999 -9999 -9999 -9999 -9999 -9999 -9999 -9999 -9999 -9999 -9999 -9999 -9999 -9999 323.377705078125 390.848525390625 288.6826171875
-9999 -9999 -9999 -9999 -9999 -9999 -9999 -9999 -9999 -9999 -9999 -9999 -9999 -9999 -9999 -9999 -9999 -9999 -9999 -9999 -9999 -9999 -9999 -9999 -9999 -9999 -9999 -9999 -9999 -9999 -9999 -9999 -9999 -9999 -9999 170.83078125 178.271762695313 153.715810546875 138.081489257813 82.199296875 6.84831665039062 4.0697492980957 1.68910091400146 0.830860347747803 0.526838665008545 0.42267557144165 0.466426706314087 2.32938835144043 10.7792504882812 140.436606445312 233.027841796875 315.441240234375 347.4486328125 366.759814453125 336.369697265625 330.86419921875 357.687509765625 352.0137890625 349.597822265625 345.822568359375 342.5286328125 295.778701171875 309.669580078125 270.978193359375 299.82990234375 264.41056640625 195.480307617187 327.01810546875 11.4541571044922 -9999 -9999 -9999 0.2616126537323 0.260934991836548 -9999 -9999 -9999 -9999 -9999 -9999 -9999 -9999 -9999 -9999 -9999 -9999 -9999 -9999 -9999 -9999 -9999 -9999 -9999 -9999 -9999 -9999 -9999 -9999 288.868623046875 288.297685546875 284.684208984375 -9999 -9999 265.140732421875 229.2432421875 226.097680664062 -9999 -9999 -9999 -9999 -9999 -9999 -9999 -9999 -9999 -9999 -9999 -9999 -9999 -9999 -9999 -9999 -9999 -9999 -9999 0.2895139503479 0.305742444992065 0.335040407180786 0.317044515609741 0.318102607727051 0.291541271209717 0.281012878417969 0.277648572921753 0.252689065933228 0.22481294631958 0.193379530906677 0.194866504669189 0.188113603591919 0.181600470542908 0.186782627105713 0.260997819900513 0.383768720626831 0.764521293640137 2.25011878967285 2.27972602844238 1.64414257049561 1.25526889801025 1.27389152526855 0.707464542388916 0.520827026367187 0.363704595565796 0.302779541015625 0.264838199615478 0.244083738327026 0.222385540008545 0.231119685173035 0.228593945503235 0.236078724861145 0.235366373062134 -9999 -9999 -9999 -9999 -9999 -9999 -9999 -9999 0.426103677749634 0.364697513580322 0.392357683181763 0.571482067108154 0.585583648681641 0.560322246551514 0.524640655517578 0.541410713195801 0.626055736541748 0.737862510681152 -9999 -9999 -9999 -9999 -9999 1.03690132141113 0.922452907562256 1.314462890625 1.28748046875 1.16966743469238 0.889829235076904 0.691465930938721 0.788091773986816 0.686360950469971 0.627866077423096 0.528093280792236 0.514359169006348 0.512707843780518 0.487486095428467 0.467395305633545 0.462581806182861 0.453679332733154 0.45811185836792 0.474695920944214 0.44137713432312 0.431825466156006 0.430163526535034 0.417979001998901 0.409603929519653 0.401289596557617 0.506844234466553 1.06356273651123 1.67558898925781 1.72438648223877 0.372488050460815 0.458752241134644 0.441638431549072 2.01764923095703 1.87269596099854 1.23618129730225 1.2618851852417 0.247159023284912 0.370235795974731 1.61115142822266 1.31015476226807 0.533113288879394 0.445727434158325 0.414946174621582 -9999 -9999 -9999 -9999 -9999 -9999 -9999 -9999 -9999 -9999 -9999 -9999 -9999 -9999 -9999 -9999 -9999 -9999 -9999 -9999 -9999 -9999 -9999 -9999 -9999 0.157104692459106 0.157499041557312 1.01633274078369 0.653865222930908 0.324398202896118 0.324427442550659 0.394922590255737 0.194634432792664 0.210184392929077 0.246941614151001 0.396509056091309 0.978228034973144 1.97506622314453 2.07193016052246 2.16308235168457 2.23078239440918 2.28612831115723 2.33251876831055 2.37621574401855 2.41600135803223 2.45007385253906 2.4755387878418 2.49114440917969 2.50909240722656 2.52636245727539 2.54009422302246 2.55362594604492 2.55880256652832 2.57504127502441 2.58281181335449 2.57788673400879 2.58386489868164 2.6056086730957 2.61197341918945 2.6114826965332 2.61050193786621 2.60950790405273 2.60846672058105 2.6054354095459 2.60094566345215 2.59352714538574 2.58317710876465 2.55952102661133 2.55544509887695 2.54206352233887 2.52206314086914 2.46496971130371 2.39295799255371 2.19523475646973 1.81949626922607 2.14138938903809 1.98124443054199 1.80042057037353 1.23642070770264 1.62860675811768 1.97267807006836 0.64064603805542 0.225656218528748 0.292125778198242 0.224754152297974 0.264866180419922 0.296700782775879 0.621610736846924 0.388331623077393 0.200834212303162 0.189647212028503 0.212216935157776 -9999 -9999 -9999 -9999 -9999 -9999 -9999 -9999 -9999 -9999 -9999 -9999 -9999 -9999 -9999 -9999 -9999 -9999 -9999 -9999 -9999 -9999 -9999 -9999 -9999 -9999 -9999 -9999 -9999 -9999 -9999 -9999 -9999 -9999 -9999 -9999 -9999 -9999 -9999 -9999 -9999 -9999 -9999 -9999 -9999 -9999 -9999 -9999 -9999 -9999 -9999 -9999 -9999 -9999 -9999 -9999 -9999 -9999 -9999 -9999 -9999 -9999 -9999 -9999 134.733860168457 -9999 -9999 -9999 -9999 -9999 -9999 -9999 -9999 -9999 -9999 -9999 -9999 -9999 -9999 -9999 -9999 -9999 147.375962677002 218.641715698242 407.142229003906 187.796758117676 330.619575805664 387.792568359375 406.603095703125 341.085726013184 376.82158996582 374.867995605469 378.702855834961 351.11639465332 347.94865447998 345.905208435059 350.965544128418 353.088871765137 351.403805236816 336.667041320801 325.972243652344 308.122091674805 307.621139831543 178.207266082764 275.828749694824 270.539978027344 -9999 -9999 -9999 -9999 -9999 -9999 -9999 -9999 -9999 -9999 -9999 -9999 -9999 -9999 -9999 -9999 -9999 -9999 -9999 -9999 -9999 -9999 -9999 -9999 -9999 -9999 -9999 -9999 -9999 -9999 -9999 -9999 -9999 -9999 -9999 -9999 -9999 -9999 -9999 -9999 -9999 -9999 -9999 -9999 -9999 -9999 -9999 -9999 -9999 -9999 -9999 -9999 -9999 316.448408203125 317.844375 335.86529296875 351.838154296875 -9999 -9999 -9999 -9999 -9999 -9999 -9999 -9999 -9999 -9999 -9999 -9999 -9999 -9999 361.14392578125 359.894853515625 360.8490234375 355.791826171875 357.49904296875 359.2552734375 357.24251953125 357.783955078125 359.107587890625 361.70484375 360.947021484375 272.81578125 -9999 269.1099609375 357.394833984375 355.431533203125 351.1662890625 367.3096875 360.266015625 354.746162109375 324.305888671875 320.1493359375 331.180693359375 325.207734375 321.469130859375 315.78041015625 317.119306640625 318.821806640625 323.3201953125 324.524794921875 321.4362890625 405.66486328125 332.08353515625 331.6559765625 334.46513671875 346.055859375 327.7115625 344.173271484375 353.432021484375 346.927294921875 342.088505859375 367.752919921875 374.965048828125 377.841708984375 377.66478515625 380.488154296875 382.88109375 384.84791015625 340.87541015625 377.23453125 347.683388671875 317.434013671875 377.241123046875 363.025869140625 408.42955078125 416.64357421875 419.232919921875 419.3185546875 426.06615234375 426.101103515625 420.57873046875 416.869072265625 418.296796875 421.708974609375 427.0398046875 427.698486328125 421.968837890625 418.054775390625 51.9154211425781 421.809931640625 413.412216796875 437.794951171875 535.98375 535.14017578125 433.3105078125 439.789423828125 453.356396484375 439.155966796875 437.747607421875 446.470224609375 448.60787109375 455.407294921875 466.17181640625 61.8495629882812 476.732314453125 465.323671875 463.6353515625 459.071162109375 476.33185546875 442.849677429199 496.963352966309 398.369588928223 415.471319274902 402.303394775391 402.839423217773 404.800933227539 515.619722900391 515.163394775391 549.88415222168 434.345248718262 434.68734375 535.193129882813 532.244036865234 550.826477050781 523.515190429688 553.243046264648 573.676358642578 557.102922363281 589.590802001953 572.109483032227 532.651723022461 519.384188232422 509.519899291992 413.107863464355 391.259704284668 379.746059875488 400.204931945801 390.943682556152 499.824739379883 402.367928466797 420.543921203613 454.817716369629 722.11833984375 747.265546875 583.6405078125 744.9664453125 755.77599609375 454.927568664551 409.525155944824 375.582428283691 376.861379699707 422.359052124023 442.492838745117 443.433713378906 545.8048828125 521.304375 608.126896362305 481.025283508301 473.255167236328 402.938791809082 469.369550170898 471.221328735352 464.100235290527 494.663192138672 486.928726501465 505.514520263672 482.873799133301 477.397770996094 469.668955078125 478.6611328125 505.034082641602 476.617173156738 525.442197875977 513.71203125 467.5548046875 468.3533203125 466.953779296875 464.616591796875 468.120703125 513.2766796875 512.11412109375 655.15458984375 516.158671875 486.41080078125 479.060625 464.327109375 444.25552734375 408.342802734375 374.3371875 352.661162109375 341.462783203125 331.474658203125 301.0998046875 289.383310546875 318.94681640625 314.0450390625 286.5641015625 325.772548828125 328.960458984375 334.17240234375 337.163759765625 343.81095703125 348.927158203125 346.7396484375 356.310234375 355.03125 3.37422706604004 -9999 -9999 -9999 -9999 -9999 -9999 -9999 -9999 -9999 -9999 -9999 -9999 -9999 -9999 -9999 -9999 -9999 -9999 -9999 -9999 557.00302734375 460.89544921875 -9999 -9999 -9999 -9999 -9999 -9999 -9999 -9999 -9999 -9999 -9999 -9999 -9999 -9999 -9999 -9999 -9999
-9999 -9999 -9999 -9999 -9999 -9999 -9999 -9999 -9999 -9999 -9999 -9999 -9999 -9999 -9999 -9999 -9999 -9999 -9999 -9999 -9999 -9999 -9999 -9999 -9999 -9999 -9999 -9999 -9999 -9999 -9999 -9999 -9999 215.21572265625 255.291708984375 241.796879882813 247.75693359375 233.381264648437 178.545966796875 94.3380981445312 5.69110336303711 5.03960815429688 6.08148513793945 3.47219306945801 2.95896903991699 4.43841979980469 9.00795318603516 16.1045764160156 138.509296875 250.98515625 301.911474609375 330.391669921875 334.479140625 337.3637109375 337.351728515625 329.320283203125 329.50453125 321.911220703125 324.829775390625 327.29607421875 336.43294921875 322.5106640625 313.550859375 320.678056640625 320.17587890625 331.02796875 337.244677734375 357.527783203125 376.969013671875 361.447529296875 363.451552734375 381.3830859375 386.26001953125 393.724306640625 391.175068359375 384.11255859375 384.8126953125 397.391044921875 438.09240234375 454.639892578125 465.873369140625 473.208603515625 -9999 -9999 -9999 -9999 -9999 -9999 402.33791015625 -9999 -9999 185.245297851562 182.9579296875 263.14798828125 256.00388671875 262.2863671875 268.857568359375 269.290224609375 271.749345703125 274.36435546875 5.1348046875 177.515947265625 2.99906204223633 0.251703243255615 0.215390725135803 0.276750926971436 272.88322265625 275.2482421875 -9999 264.53490234375 6.56904602050781 254.298896484375 -9999 261.661552734375 134.340498046875 96.0513940429688 56.7417590332031 205.515 171.11572265625 -9999 -9999 -9999 -9999 -9999 -9999 0.600317058563232 0.546981754302978 0.383492488861084 0.332147827148437 0.308425798416138 0.271129188537598 0.255676431655884 0.196366267204285 0.174618301391602 0.145225710868835 0.148150005340576 0.160158219337463 0.183777265548706 0.234399046897888 0.438890361785889 0.385066509246826 0.581213207244873 3.03823791503906 6.18550277709961 9.17518798828125 55.6339453125 71.3924560546875 21.135029296875 7.01092849731445 3.19562347412109 1.57405986785889 0.575267314910889 0.449751033782959 0.32753568649292 0.264641304016113 0.248909368515015 0.240140647888184 0.233832292556763 0.310070858001709 -9999 -9999 -9999 -9999 0.295097064971924 0.323095321655273 0.630186824798584 0.773462448120117 1.02956680297852 0.774542655944824 1.02506973266602 1.07512229919434 0.752125282287598 0.904956150054932 0.89767541885376 0.746028213500977 1.86455738067627 -9999 1.04606105804443 -9999 -9999 -9999 -9999 -9999 -9999 -9999 4.17612762451172 2.40000114440918 -9999 -9999 0.624986171722412 0.56928279876709 0.535724716186523 0.54291561126709 0.55784236907959 0.501833038330078 0.509757099151611 0.489979133605957 0.467180013656616 0.467809352874756 0.528988265991211 0.438862981796265 0.493353366851807 0.473738451004028 0.538592891693115 0.589278717041016 0.502940139770508 0.763947830200195 1.00152774810791 0.566420230865479 0.471164216995239 0.472363185882568 0.491035137176514 0.762253761291504 0.316391258239746 0.304534950256348 0.410777292251587 0.759264736175537 1.12264045715332 1.91610328674316 2.14995712280273 0.417076978683472 0.400653047561645 2.21994781494141 2.09533790588379 0.614139518737793 0.408192186355591 -9999 -9999 -9999 -9999 -9999 -9999 -9999 -9999 -9999 -9999 -9999 -9999 -9999 -9999 -9999 -9999 -9999 -9999 -9999 -9999 -9999 -9999 -9999 -9999 0.157409048080444 0.198269991874695 0.38816442489624 0.358949604034424 0.262892274856567 0.5119797706604 322.328408203125 25.4845825195312 5.68195495605469 16.5053521728516 0.302411785125732 0.553619327545166 1.23714580535889 1.95777809143066 2.05152763366699 2.11646598815918 2.18023452758789 2.24448600769043 2.29079063415527 2.34066696166992 2.37746246337891 2.41261871337891 2.43872245788574 2.45733100891113 2.47898918151855 2.49144813537598 2.50695693969727 2.52204254150391 2.53330169677734 2.54373046875 2.54467735290527 2.5616512298584 2.56772369384766 2.57896293640137 2.58662864685059 2.58504592895508 2.57979331970215 2.5767391204834 2.56457542419434 2.54433723449707 2.51357780456543 2.47452072143555 2.46799507141113 2.46520179748535 2.47492515563965 2.4754222869873 2.43568862915039 2.36932891845703 2.3057137298584 2.24302116394043 2.1203816986084 2.11833389282227 2.03283187866211 2.3317797088623 2.19066947937012 1.9077087020874 1.99336990356445 2.01704612731934 1.74771663665771 1.69281188964844 1.27929496765137 0.384272718429565 0.258017721176147 0.187063050270081 0.186514649391174 0.193739247322083 -9999 -9999 -9999 -9999 -9999 -9999 -9999 -9999 -9999 -9999 -9999 -9999 -9999 -9999 -9999 -9999 -9999 -9999 -9999 -9999 -9999 -9999 -9999 -9999 -9999 -9999 -9999 -9999 -9999 -9999 -9999 -9999 -9999 -9999 -9999 -9999 -9999 -9999 -9999 -9999 -9999 -9999 -9999 -9999 -9999 -9999 -9999 -9999 -9999 -9999 -9999 -9999 -9999 -9999 -9999 -9999 -9999 -9999 -9999 -9999 -9999 -9999 -9999 -9999 -9999 140.647725524902 -9999 -9999 -9999 -9999 -9999 -9999 -9999 -9999 -9999 -9999 -9999 -9999 146.796262207031 152.67320892334 164.919942169189 245.647919311523 232.89265625 317.395969848633 314.10615234375 248.85462890625 387.06509765625 403.972705078125 393.9296484375 430.271279296875 440.992822265625 430.82607421875 393.7112109375 404.4781640625 380.117430725098 365.616595458984 383.506962890625 370.884671630859 359.581124267578 353.660883178711 348.294435424805 335.042218322754 314.745194091797 220.440926513672 186.200516052246 174.612231903076 170.140328063965 156.133148345947 164.787158660889 163.726174621582 249.678012084961 -9999 -9999 -9999 -9999 -9999 -9999 -9999 -9999 -9999 -9999 -9999 -9999 -9999 -9999 -9999 -9999 -9999 -9999 -9999 -9999 -9999 -9999 -9999 -9999 -9999 -9999 -9999 -9999 -9999 -9999 -9999 -9999 -9999 -9999 -9999 -9999 -9999 -9999 -9999 -9999 -9999 -9999 -9999 -9999 -9999 -9999 -9999 -9999 -9999 -9999 320.206962890625 333.822568359375 352.6425 361.28765625 363.935009765625 380.55392578125 385.430185546875 412.813271484375 379.590673828125 365.27150390625 347.633583984375 -9999 -9999 -9999 -9999 -9999 341.6602734375 340.348828125 340.094296875 344.00712890625 365.051015625 363.122021484375 360.74953125 358.413486328125 354.536337890625 352.68298828125 354.79634765625 356.371376953125 288.1259765625 -9999 381.51263671875 362.2241015625 367.5467578125 392.987548828125 377.039091796875 372.91470703125 372.949892578125 368.16322265625 367.785498046875 353.162548828125 348.8895703125 344.950048828125 350.355732421875 337.861787109375 336.68947265625 339.48205078125 337.691513671875 345.7284375 344.190673828125 339.858017578125 343.385478515625 342.938935546875 345.50279296875 355.93189453125 355.68662109375 357.69416015625 355.0105078125 360.976083984375 348.0740625 379.79994140625 352.636201171875 351.681416015625 368.784931640625 376.481689453125 368.87255859375 312.606005859375 140.803286132813 0.559621238708496 1.08427528381348 150.08291015625 223.057749023437 355.97671875 352.299169921875 311.144736328125 359.658720703125 424.41234375 427.1475 429.50361328125 433.464814453125 428.6389453125 433.972412109375 434.985439453125 434.38119140625 435.30380859375 433.9142578125 414.85845703125 406.578955078125 410.5484765625 422.4188671875 534.69052734375 438.915087890625 455.043515625 596.44294921875 487.11076171875 607.89076171875 502.42658203125 475.141904296875 478.342119140625 481.141904296875 482.22392578125 483.26947265625 486.14091796875 480.060556640625 67.4715747070313 66.6025854492188 578.2016015625 429.006717224121 409.268682861328 400.752078552246 414.384790649414 410.653891296387 492.312727661133 498.797306213379 394.309193115234 401.396206970215 372.708080749512 379.423028869629 409.383852539063 532.245184936523 531.58268737793 547.361054077148 564.233834838867 535.135303344727 589.093868408203 458.868836975098 578.015584716797 549.685958862305 517.18309387207 406.20744140625 368.691674194336 368.228608703613 365.008812561035 394.994440612793 479.458407897949 388.787242126465 410.365423278809 429.667402038574 528.03416015625 608.31123046875 754.85859375 741.82916015625 65.68130859375 72.0589379882812 586.84142578125 465.893552856445 430.977079467773 414.005292663574 409.598360595703 439.792665710449 497.075289916992 671.1528515625 722.01873046875 635.883997192383 618.07414855957 634.137297363281 513.333550415039 536.6778515625 574.02 598.308046875 617.8890234375 627.1688671875 620.38400390625 666.6087890625 825.43130859375 808.87013671875 656.62212890625 803.3101171875 645.34634765625 569.54466796875 577.04408203125 546.515625 508.431328125 497.92669921875 486.7978125 489.2283984375 540.62080078125 543.61400390625 545.89494140625 554.25521484375 512.530078125 512.1655078125 507.43599609375 497.75666015625 476.925380859375 478.17240234375 423.28294921875 372.793740234375 349.989580078125 349.2815625 319.29703125 296.776083984375 287.471923828125 292.112958984375 328.587421875 290.34791015625 329.451328125 343.702529296875 354.32935546875 366.5042578125 376.399072265625 387.077666015625 392.9902734375 391.51576171875 141.627641601562 11.4527774047852 1.61128349304199 0.225242042541504 0.19660231590271 0.188257813453674 0.148704428672791 376.4441015625 1.33859882354736 29.0130999755859 214.298188476563 321.6711328125 -9999 -9999 385.819541015625 391.731826171875 399.36791015625 542.34240234375 558.65115234375 -9999 60.9284509277344 442.183388671875 123.764970703125 1.83950271606445 16.6946154785156 364.662041015625 410.08546875 383.33595703125 323.35341796875 186.49564453125 146.201674804687 94.4519970703125 11.7186859130859 379.740908203125 381.677724609375 -9999 -9999 -9999 -9999 -9999
-9999 -9999 -9999 -9999 -9999 -9999 -9999 -9999 -9999 -9999 -9999 -9999 -9999 -9999 -9999 -9999 -9999 -9999 -9999 -9999 -9999 -9999 -9999 -9999 -9999 -9999 -9999 -9999 -9999 -9999 -9999 -9999 180.65466796875 272.221376953125 222.5553515625 211.939248046875 194.5095703125 8.96567962646484 0.318824157714844 0.298684988021851 0.282491312026978 0.313192462921143 1.70695255279541 0.77043514251709 3.17978324890137 4.16763885498047 10.4505889892578 108.550568847656 204.26859375 283.313408203125 305.33642578125 323.93595703125 323.934462890625 322.691015625 320.752705078125 313.78728515625 306.14759765625 301.4508984375 304.952900390625 310.671826171875 331.34654296875 335.75173828125 332.048671875 338.71201171875 366.464853515625 333.922294921875 236.133837890625 26.0096411132812 4.93778732299805 0.463650255203247 0.324315462112427 0.34338131904602 1.32036827087402 0.462494773864746 0.413039331436157 0.830664539337158 0.631603031158447 0.725038261413574 0.471457557678223 0.400447340011597 0.351201438903809 17.2497747802734 458.3540625 481.92111328125 -9999 -9999 -9999 -9999 315.258134765625 258.792392578125 199.803911132812 208.5411328125 274.963505859375 274.90517578125 265.322724609375 266.280703125 263.37181640625 259.152158203125 258.8790234375 256.37162109375 0.535328235626221 0.61925199508667 0.21762282371521 0.259666528701782 0.231320471763611 0.242410984039307 265.85255859375 248.846806640625 250.662333984375 207.950581054687 168.802265625 187.076279296875 192.031040039063 138.82546875 26.9385772705078 0.427941026687622 0.25531268119812 0.247626657485962 0.434047021865845 5.10481063842773 3.71618019104004 188.499916992187 242.153100585937 158.5053515625 190.603432617187 -9999 -9999 80.9085864257813 94.7419409179687 86.658984375 25.9587414550781 9.32779907226563 2.30154098510742 0.188232107162476 0.187084121704102 0.23723569393158 0.435466833114624 1.19111560821533 3.12197822570801 7.74422698974609 6.78017028808594 19.6601202392578 113.436188964844 124.620512695312 155.603891601562 194.8201171875 0.215782856941223 167.29962890625 120.186372070313 44.1994958496094 9.57993896484375 2.91196472167969 1.84105155944824 0.716367874145508 0.359009027481079 0.262219305038452 0.478286447525024 0.710211868286133 1.07424854278564 1.19437831878662 1.52439056396484 1.91541400909424 0.429118766784668 0.45369818687439 0.460683717727661 0.730738735198975 1.59360740661621 2.58848236083984 3.88601760864258 3.36902893066406 -9999 7.80253784179687 7.49131484985352 4.09845657348633 1.30913497924805 2.51495223999023 3.24179878234863 5.56133102416992 8.37266235351562 5.92093505859375 -9999 5.75156066894531 1.69303001403809 -9999 -9999 -9999 -9999 -9999 -9999 0.689498062133789 0.518385944366455 0.543040752410889 0.516548194885254 0.508723011016846 0.494284515380859 0.483877658843994 0.466535167694092 0.536824035644531 -9999 -9999 -9999 0.449335441589355 0.486437530517578 0.567618885040283 -9999 1.06322147369385 1.44171192169189 2.04558288574219 4.49450775146484 2.14826271057129 1.18550926208496 0.588360385894775 0.494185123443603 0.503965244293213 0.488893089294434 0.467832040786743 0.46804238319397 0.533074836730957 0.796509246826172 1.93052169799805 0.443973340988159 0.483867530822754 1.06358322143555 2.13044059753418 0.449070081710815 0.399325075149536 0.339480800628662 -9999 -9999 -9999 -9999 -9999 -9999 -9999 -9999 -9999 -9999 -9999 -9999 -9999 -9999 -9999 -9999 -9999 -9999 -9999 -9999 -9999 -9999 -9999 -9999 91.6570239257812 0.169254298210144 0.163567743301392 0.52078971862793 285.833759765625 -9999 320.614306640625 106.704733886719 79.9815234375 0.240359687805176 0.340623893737793 0.616377639770508 1.13153366088867 1.91638526916504 2.00507354736328 2.07001808166504 2.14666397094727 2.20347633361816 2.25528694152832 2.30410354614258 2.34725738525391 2.38243789672852 2.40957000732422 2.43038063049316 2.45047210693359 2.47015274047852 2.48653266906738 2.50200325012207 2.51578605651855 2.5125178527832 2.53252784729004 2.54443748474121 2.55214691162109 2.55664192199707 2.55609489440918 2.55202697753906 2.5494408416748 2.52160354614258 2.45948661804199 2.37493927001953 2.27046249389648 2.19744781494141 2.1588606262207 2.1532502746582 2.24797096252441 2.27526397705078 2.22204277038574 2.05555961608887 2.0044278717041 1.84973407745361 1.89148063659668 1.91451278686523 1.89523590087891 1.98246940612793 1.91031074523926 2.25203201293945 1.84440547943115 0.308601522445679 0.186152200698853 0.217222580909729 0.197726097106934 -9999 -9999 -9999 -9999 -9999 -9999 -9999 -9999 -9999 -9999 -9999 -9999 -9999 -9999 -9999 -9999 -9999 -9999 -9999 -9999 -9999 -9999 -9999 -9999 -9999 -9999 -9999 -9999 -9999 -9999 -9999 -9999 -9999 -9999 -9999 -9999 -9999 -9999 -9999 -9999 -9999 -9999 -9999 -9999 -9999 -9999 -9999 -9999 -9999 -9999 -9999 -9999 -9999 -9999 -9999 -9999 -9999 -9999 -9999 -9999 -9999 -9999 -9999 -9999 -9999 -9999 -9999 -9999 -9999 -9999 -9999 -9999 -9999 -9999 -9999 -9999 -9999 -9999 114.477889251709 121.70748298645 126.476404953003 217.217504882813 224.442936859131 528.613323974609 281.411306762695 456.929200744629 485.92513092041 323.683798828125 269.92646484375 331.223671875 394.0737890625 435.178857421875 359.401420898437 397.43900390625 415.842919921875 361.678287963867 377.915460205078 384.106162719727 391.237770080566 395.087525024414 375.291422424316 354.41767364502 344.781488342285 339.195335998535 334.154124755859 321.636008605957 244.166937561035 181.76025970459 176.141734771729 169.274485931396 170.691251220703 165.917752075195 171.660268707275 180.880837097168 182.196118927002 215.145070037842 188.446521148682 188.331336364746 189.893423309326 260.362446899414 270.337524719238 -9999 -9999 -9999 -9999 -9999 -9999 -9999 -9999 -9999 -9999 -9999 -9999 -9999 -9999 -9999 -9999 -9999 -9999 -9999 -9999 -9999 -9999 -9999 252.273720703125 311.065383911133 407.604942321777 315.488328552246 314.708818359375 -9999 -9999 -9999 -9999 -9999 -9999 -9999 -9999 -9999 -9999 -9999 -9999 -9999 -9999 -9999 -9999 -9999 -9999 -9999 322.45447265625 327.40435546875 344.447578125 358.49267578125 390.255263671875 359.904287109375 371.148662109375 331.588681640625 346.49419921875 316.87130859375 298.60048828125 325.660078125 -9999 -9999 -9999 350.612431640625 349.053779296875 334.306494140625 330.930673828125 357.6568359375 340.561640625 341.6930859375 366.79869140625 370.316513671875 371.00748046875 311.12197265625 -9999 323.019462890625 375.90755859375 384.4923046875 409.37390625 394.91337890625 390.624931640625 391.931689453125 383.853310546875 378.877880859375 373.444013671875 373.0878515625 367.73607421875 368.37046875 362.603671875 370.206884765625 365.86306640625 354.931845703125 364.669189453125 366.484775390625 369.024609375 362.14259765625 361.295361328125 420.630732421875 361.36171875 349.63013671875 342.092578125 346.717763671875 353.236552734375 365.76662109375 354.483486328125 368.35623046875 319.12927734375 352.148583984375 354.995947265625 364.132119140625 39.7343444824219 303.282509765625 16.7210485839844 0.939567432403564 14.8069711303711 243.37716796875 257.286884765625 40.3734704589844 0.543134651184082 0.705619697570801 28.1577026367187 180.194663085937 337.069541015625 296.884482421875 15.2143579101562 464.05458984375 455.24009765625 451.20228515625 423.998671875 427.251181640625 415.699921875 428.480478515625 416.7969140625 402.856435546875 409.416874694824 496.493519897461 422.965869140625 420.0767578125 456.60427734375 451.5645703125 466.1026171875 473.0811328125 492.0118359375 504.04470703125 501.322734375 597.4967578125 605.855625 473.2884375 440.386201171875 439.998662109375 399.871326599121 394.449529724121 397.032176513672 389.838452453613 396.051542358398 385.474663696289 492.647752990723 493.623976135254 495.416931152344 412.014960021973 513.843656616211 501.763227539062 405.517994384766 527.082247924805 519.142791137695 544.583084106445 552.861947021484 547.894786376953 438.721787109375 547.91369934082 538.800007324219 418.600538635254 394.162965087891 359.265555725098 395.581528015137 387.850506591797 476.788114929199 475.374778747559 361.763547363281 378.179969787598 430.891246032715 711.69169921875 747.40119140625 738.55751953125 689.8758984375 7.34138397216797 575.5599609375 549.2203125 497.3398828125 477.097939453125 396.4700390625 423.85677154541 600.274572143555 433.919072570801 460.264770812988 447.433805236816 426.828674926758 601.933112182617 476.191571044922 510.2337890625 530.95458984375 517.7225390625 518.34884765625 635.5817578125 637.23357421875 631.796015625 627.4359375 643.9257421875 625.658671875 511.35046875 535.302740478516 636.19412109375 636.168046875 644.4737109375 558.58919128418 536.433651123047 484.9437890625 558.77244140625 509.644921875 486.670224609375 502.37583984375 493.52671875 500.54501953125 552.41654296875 560.85140625 568.8024609375 719.3728125 550.65322265625 545.37744140625 478.094326171875 444.584853515625 453.92619140625 415.1658984375 391.4426953125 372.202646484375 320.6476171875 355.0725 352.565068359375 353.594619140625 316.630869140625 319.86591796875 363.384814453125 340.002041015625 347.2789453125 352.645634765625 355.41943359375 357.534755859375 365.33484375 361.338046875 405.24052734375 403.118466796875 377.647265625 414.548525390625 441.5162109375 445.1203125 479.822607421875 425.770810546875 430.09541015625 420.891416015625 410.59412109375 408.91798828125 521.4516796875 368.90044921875 373.603505859375 378.7228125 400.06728515625 410.656318359375 -9999 -9999 413.2466015625 434.652802734375 362.799521484375 186.005830078125 30.4944140625 31.8780944824219 123.560712890625 2.61745079040527 11.5804623413086 2.96019744873047 0.296552295684814 0.28715106010437 0.270419597625732 0.305593070983887 0.267245578765869 0.253591661453247 0.232565460205078 0.215237517356873 -9999
0.267678680419922 0.242310962677002 0.220994639396667 -9999 -9999 -9999 -9999 -9999 -9999 -9999 -9999 -9999 -9999 -9999 -9999 -9999 -9999 -9999 -9999 -9999 -9999 -9999 -9999 -9999 -9999 -9999 -9999 21.1139794921875 180.11525390625 216.81802734375 226.884228515625 229.8734765625 169.702163085937 155.163427734375 152.00431640625 9.55434265136719 0.681601982116699 0.551655006408691 0.614742221832275 0.351858472824097 0.315887432098389 0.308036699295044 0.519212036132813 3.11263229370117 0.540143795013428 0.970135803222656 8.33964660644531 43.96916015625 184.426640625 251.9750390625 310.714833984375 323.601298828125 346.43677734375 352.7579296875 359.20412109375 360.2991796875 362.6349609375 373.431591796875 390.493330078125 404.572763671875 412.839462890625 447.057392578125 467.043427734375 449.983623046875 15.6995379638672 0.353819189071655 0.354762697219849 0.39463620185852 0.445353469848633 0.349341144561768 0.778884716033935 0.302020168304443 0.289124307632446 0.325811347961426 0.344087333679199 0.360481824874878 0.411448431015015 0.359494142532349 0.370214281082153 0.372208642959595 2.37805023193359 0.448040542602539 186.888515625 386.65078125 484.39048828125 501.262265625 473.553134765625 445.308193359375 316.989697265625 255.750966796875 238.934560546875 254.8946484375 331.037080078125 307.074814453125 305.04498046875 310.43443359375 308.86728515625 300.22734375 291.690615234375 273.22271484375 260.990244140625 236.190087890625 230.818798828125 223.5664453125 254.66859375 271.942470703125 281.447080078125 281.047353515625 271.90669921875 248.20236328125 233.95869140625 227.153041992187 219.782651367187 230.533974609375 239.034301757812 241.203823242187 255.194677734375 256.221328125 254.713037109375 247.474130859375 131.0775 0.497500419616699 1.03836753845215 2.49608184814453 152.36138671875 125.559345703125 125.749350585937 207.261284179687 245.161962890625 243.193813476562 213.435131835937 205.1776171875 -9999 6.62784118652344 3.89933807373047 14.3681332397461 58.1679125976562 114.007836914062 158.9731640625 208.941298828125 221.869790039062 221.109594726563 0.333866243362427 0.498604602813721 0.359266004562378 218.801059570313 215.128110351562 199.197788085938 194.122529296875 0.264055137634277 165.742060546875 0.293072519302368 0.323924789428711 0.404722681045532 0.805117206573486 1.48104881286621 2.06285591125488 -9999 -9999 5.67400772094727 9.69831481933594 9.62616851806641 8.79680328369141 2.39684120178223 2.04270195007324 3.72801086425781 5.93514266967773 9.55045440673828 48.8029028320313 46.6651611328125 44.0441821289063 85.690986328125 8.16183654785156 46.5638745117188 4.66492126464844 2.12206466674805 0.604993286132812 0.784535808563232 4.17409744262695 -9999 9.64929473876953 0.940460758209228 1.01187320709229 2.51519714355469 -9999 -9999 -9999 -9999 0.479929618835449 0.570100994110107 0.506562080383301 0.447882442474365 0.468954019546509 0.458296566009521 0.462028198242187 0.494157028198242 0.4474072265625 0.577803268432617 -9999 -9999 -9999 0.593048858642578 0.662188625335693 -9999 -9999 -9999 2.76035682678223 5.67329406738281 4.08585205078125 47.6595520019531 19.5158312988281 21.2783569335937 23.6908776855469 14.1298205566406 6.82799514770508 0.706445903778076 0.480686988830566 0.46715443611145 1.44024181365967 0.647142677307129 0.478412933349609 0.417093486785889 0.406688404083252 0.382454624176025 -9999 -9999 -9999 -9999 -9999 -9999 -9999 -9999 -9999 -9999 -9999 -9999 -9999 -9999 -9999 -9999 -9999 -9999 -9999 -9999 -9999 -9999 -9999 -9999 -9999 -9999 -9999 -9999 -9999 293.095166015625 306.0946875 124.368046875 323.7703125 260.86294921875 222.368759765625 2.8725910949707 0.271494655609131 0.273081207275391 0.483724822998047 1.0669361114502 1.41739643096924 1.91052177429199 1.99218955993652 2.06908195495605 2.14367935180664 2.18933372497559 2.24586296081543 2.29325981140137 2.32878158569336 2.35580543518066 2.38927597045898 2.42395042419434 2.44753646850586 2.47167846679687 2.48865692138672 2.49383285522461 2.51149681091309 2.52326843261719 2.52833106994629 2.5253052520752 2.52185485839844 2.52132270812988 2.51870109558105 2.51254440307617 2.4963166809082 2.42562812805176 2.30266044616699 2.11408401489258 2.27595703125 1.94896728515625 1.78992118835449 2.23704551696777 1.8586389541626 1.85525104522705 2.04180564880371 1.85850208282471 2.23824142456055 1.82193752288818 2.09221435546875 1.75049903869629 1.53964324951172 0.41654806137085 0.331691837310791 0.171747808456421 0.238170447349548 -9999 -9999 -9999 -9999 -9999 -9999 -9999 -9999 -9999 -9999 -9999 -9999 -9999 -9999 -9999 -9999 -9999 -9999 -9999 -9999 -9999 -9999 -9999 -9999 -9999 -9999 -9999 -9999 -9999 -9999 -9999 -9999 -9999 -9999 -9999 -9999 -9999 -9999 -9999 -9999 -9999 -9999 -9999 -9999 -9999 -9999 -9999 -9999 -9999 -9999 -9999 -9999 -9999 -9999 -9999 -9999 -9999 -9999 -9999 -9999 -9999 -9999 -9999 -9999 -9999 -9999 -9999 -9999 -9999 -9999 -9999 -9999 -9999 -9999 -9999 -9999 -9999 -9999 -9999 117.502649230957 201.124747924805 125.920353240967 144.911265106201 211.009853210449 144.162843475342 260.103043212891 392.032421875 309.46171875 298.754150390625 263.827529296875 334.57271484375 345.244306640625 425.372109375 437.98330078125 426.235927734375 357.567679138184 363.684179992676 371.548226623535 371.359731445312 368.356407165527 363.350997619629 362.037936401367 364.138272399902 362.259604797363 356.937810974121 339.007384643555 231.174788818359 322.363916015625 316.764621276855 316.377539978027 212.969928131104 306.307746276855 181.399991912842 202.795720367432 247.971781768799 181.757736968994 188.763358612061 193.969771270752 220.990988616943 195.693826904297 196.105440673828 196.593718414307 278.998665161133 297.999728393555 281.118578796387 198.123553619385 319.086943359375 202.387203369141 -9999 -9999 -9999 -9999 -9999 -9999 -9999 -9999 -9999 254.332424926758 251.115556030273 276.234151000977 291.664119262695 310.503127441406 -9999 -9999 -9999 -9999 -9999 362.508566894531 302.522555236816 302.793530273438 310.26486328125 -9999 -9999 -9999 -9999 -9999 284.39953125 292.6449609375 305.386811828613 298.317685546875 -9999 -9999 294.191279296875 338.536845703125 345.656220703125 350.930244140625 341.325380859375 348.012861328125 343.460478515625 340.047919921875 303.55751953125 302.76556640625 316.740263671875 328.71732421875 345.394365234375 347.9044921875 381.311015625 358.651025390625 360.129609375 356.15630859375 360.808916015625 346.95984375 382.838759765625 362.79416015625 345.89771484375 366.721728515625 385.519951171875 -9999 339.74021484375 345.585380859375 358.943291015625 365.87408203125 366.513046875 376.696259765625 379.093916015625 349.889736328125 359.1003515625 358.270341796875 337.674345703125 -9999 396.265751953125 405.565400390625 393.22412109375 420.568505859375 419.150888671875 379.32087890625 409.6883203125 406.77796875 400.969541015625 399.174140625 390.229189453125 389.617763671875 389.65541015625 379.28771484375 387.60298828125 383.9588671875 380.954326171875 364.0921875 354.3791015625 350.0762109375 343.421396484375 352.788984375 336.81521484375 345.604365234375 317.067802734375 353.72080078125 364.28671875 352.307255859375 345.084287109375 341.9349609375 353.72091796875 393.51908203125 386.3673046875 380.337890625 405.178359375 75.37845703125 53.2754260253906 52.131650390625 38.3883654785156 398.3278125 346.79056640625 182.830942382812 4.89273422241211 293.360654296875 379.21400390625 437.967333984375 438.984580078125 404.266376953125 376.88080078125 442.065087890625 442.301923828125 444.263056640625 449.1556640625 440.35681640625 423.497724609375 404.686277160645 392.915585632324 381.19202545166 379.528560791016 366.62922454834 366.352086181641 368.422239990234 369.553362121582 391.674701843262 379.746875610352 355.308305053711 386.107462463379 386.375265197754 379.85204498291 378.541219482422 394.741170043945 402.027736816406 487.755398254395 501.979820251465 477.931050109863 406.317082214355 409.704194641113 370.857389831543 393.041571350098 503.814105834961 508.954504394531 496.11955078125 500.884469604492 500.01136138916 506.956679077148 492.178403320312 514.851542358398 511.655251464844 519.042244262695 536.150077514648 529.607702636719 531.166420898438 398.563582763672 502.689056396484 393.181424560547 377.617294006348 350.026754150391 378.380308227539 476.426895446777 377.538500061035 354.348034057617 365.282899475098 370.025219421387 414.059493713379 651.756384887695 716.09625 754.10982421875 581.5719140625 0.452412385940552 456.32970703125 502.62216796875 451.159482421875 385.698017578125 376.322724609375 480.21498046875 473.646884765625 451.863577880859 441.51344329834 445.676259155273 405.547360839844 587.326865844727 469.686328125 996.924375 645.982190551758 502.053085327148 566.61826171875 631.35228515625 677.02845703125 651.1134375 681.9146484375 639.47859375 633.3840234375 529.0976953125 707.35904296875 550.354861450195 505.478084106445 474.810048522949 591.356293945312 425.205966796875 467.457588500977 472.431728210449 436.210018615723 450.057933654785 450.540380859375 512.92734375 524.63302734375 537.4147265625 480.611923828125 485.764833984375 481.075986328125 477.34646484375 473.309970703125 458.749775390625 489.809677734375 464.15267578125 440.368212890625 379.444013671875 370.040361328125 364.4546484375 405.94283203125 400.048388671875 303.334189453125 371.888759765625 414.169658203125 403.43578125 397.45939453125 387.2377734375 383.88357421875 382.22326171875 387.871787109375 392.568193359375 399.22125 406.03212890625 403.399716796875 398.035166015625 458.047587890625 468.0376171875 481.27037109375 434.250673828125 492.21919921875 383.545810546875 14.413620300293 477.5544140625 224.127934570313 141.23572265625 276.993251953125 407.98646484375 397.547607421875 397.503603515625 422.503359375 413.313720703125 452.78267578125 459.0331640625 457.21857421875 459.472177734375 415.666494140625 317.782353515625 17.8843817138672 28.1364056396484 0.711689929962158 0.291255884170532 0.308265867233276 0.438474569320679 0.647744407653809 1.83432426452637 1.25934047698975 1.76213871002197 1.79238006591797 0.428331785202026 0.453553991317749 0.340708980560303
0.74073205947876 0.312383508682251 0.223168387413025 0.209612832069397 0.267020845413208 0.197709703445435 -9999 -9999 -9999 -9999 -9999 -9999 -9999 -9999 -9999 -9999 -9999 -9999 -9999 -9999 -9999 -9999 -9999 -9999 -9999 -9999 -9999 170.394184570312 217.95638671875 241.05580078125 234.346640625 225.714711914062 167.711674804688 143.473432617187 8.58852172851562 11.778928527832 3.98738433837891 10.3203680419922 0.471847486495972 0.530035343170166 167.55708984375 4.51138000488281 8.09766082763672 3.66723083496094 0.31208833694458 0.703994178771973 0.916946926116943 1.72257236480713 0.341514558792114 0.320696954727173 0.325029888153076 1.1033540725708 1.42436382293701 0.321076326370239 12.7760577392578 265.459716796875 302.107998046875 356.743125 22.4063873291016 5.26290115356445 306.159169921875 0.391518001556396 158.514887695312 1.31329616546631 90.4215234375 110.526394042969 28.9621087646484 23.9490472412109 257.59142578125 195.815288085937 81.5631298828125 129.876782226562 97.5615014648437 165.556201171875 152.261557617187 171.609887695312 180.382412109375 171.035756835937 80.4371923828125 215.96765625 450.004951171875 452.385703125 441.218291015625 431.93279296875 392.354443359375 427.159453125 570.6355078125 569.1871875 403.0630078125 256.976923828125 224.254145507812 217.73625 286.50498046875 310.61396484375 325.479140625 340.263955078125 344.127099609375 343.063037109375 349.721279296875 348.197841796875 336.556083984375 297.933515625 270.283447265625 261.93146484375 295.64666015625 305.76685546875 297.83150390625 296.181943359375 293.036689453125 292.3578515625 288.61880859375 285.65232421875 281.699326171875 284.72783203125 286.718994140625 289.028876953125 290.7162890625 294.84814453125 297.752724609375 298.561083984375 163.955288085937 101.31 240.176484375 247.311181640625 265.11046875 234.39123046875 237.54123046875 256.559150390625 288.3343359375 313.306376953125 285.8333203125 241.929111328125 233.4659765625 -9999 -9999 -9999 190.299404296875 187.422143554687 59.2989184570312 -9999 -9999 -9999 15.57662109375 223.133349609375 227.688325195313 241.350307617187 251.243466796875 250.256865234375 225.370620117187 115.052578125 95.9582592773437 1.62422046661377 1.94887229919434 2.73648696899414 -9999 -9999 -9999 -9999 -9999 -9999 -9999 -9999 139.6074609375 16.5252484130859 16.5384301757813 25.9165008544922 85.7417578125 145.003051757812 126.442250976562 31.7493127441406 19.7514422607422 58.1704577636719 57.6751354980469 12.4249905395508 6.04168350219727 5.05135620117187 3.20283004760742 2.30279983520508 5.11999740600586 20.1598461914062 7.06762893676758 1.45446155548096 4.55909088134766 11.2858355712891 7.24682556152344 -9999 10.6267208862305 -9999 0.972072486877441 0.48913272857666 0.476908006668091 0.45766227722168 0.443318309783936 0.443289728164673 0.460898723602295 0.54328742980957 0.825926284790039 -9999 -9999 -9999 -9999 0.695355720520019 0.917458934783935 -9999 -9999 -9999 2.92864677429199 8.98622222900391 10.2212924194336 16.2356378173828 10.1886859130859 73.8901977539062 7.92487060546875 79.5482739257812 13.1649865722656 1.93814346313477 0.485808620452881 0.460761222839355 4.07697875976563 0.944842014312744 0.410562143325806 0.415614767074585 0.503132629394531 0.767818908691406 0.419955654144287 0.42108172416687 0.344254703521728 -9999 -9999 -9999 -9999 -9999 -9999 -9999 -9999 -9999 -9999 -9999 -9999 -9999 -9999 -9999 -9999 -9999 -9999 -9999 -9999 -9999 -9999 -9999 -9999 -9999 -9999 40.6886938476562 37.1485363769531 158.4861328125 269.91298828125 283.463525390625 276.670751953125 2.07554168701172 0.292781839370728 0.252203750610352 0.414937334060669 0.76685640335083 1.36319915771484 1.91611175537109 1.95661994934082 2.02736595153809 2.03081405639648 2.07553825378418 2.05489128112793 2.10067520141602 2.13744232177734 2.2352986907959 2.34573165893555 2.39675491333008 2.43118103027344 2.45124572753906 2.46104530334473 2.46352432250977 2.46684356689453 2.46489898681641 2.46220184326172 2.45748962402344 2.4562328338623 2.46056831359863 2.45357162475586 2.44898414611816 2.40458198547363 2.35844032287598 2.1712296295166 2.01035842895508 1.82271308898926 1.97032241821289 1.57472602844238 0.275621280670166 0.323433780670166 0.648122520446777 0.251016139984131 0.17702465057373 0.173550338745117 0.158159666061401 0.588687343597412 0.329885845184326 0.190949149131775 -9999 -9999 -9999 -9999 -9999 -9999 -9999 -9999 -9999 -9999 -9999 -9999 -9999 -9999 -9999 -9999 -9999 -9999 -9999 -9999 -9999 -9999 -9999 -9999 -9999 -9999 -9999 -9999 -9999 -9999 -9999 -9999 -9999 -9999 -9999 -9999 -9999 -9999 -9999 -9999 -9999 -9999 -9999 -9999 -9999 -9999 -9999 -9999 -9999 -9999 -9999 -9999 -9999 -9999 -9999 -9999 -9999 -9999 -9999 -9999 -9999 -9999 -9999 -9999 -9999 -9999 -9999 -9999 -9999 -9999 -9999 -9999 -9999 -9999 -9999 -9999 -9999 -9999 -9999 -9999 110.761008453369 110.026612930298 114.922162628174 118.90531288147 183.673793945312 189.395175476074 204.720628051758 215.045550384521 164.639284057617 343.643167724609 310.84869140625 170.828071289063 296.978232421875 352.49056640625 363.387421875 350.539337768555 363.194618225098 379.878450622559 306.203060302734 308.412130737305 304.427537841797 312.261734619141 365.8398046875 303.590956420898 306.593525390625 361.801917114258 303.738876342773 293.462641296387 304.25433013916 359.482420349121 342.449967041016 334.692177429199 331.291680908203 290.146256103516 336.96118927002 320.454643249512 329.116025390625 279.018031311035 275.345411682129 282.766544494629 232.674305877686 227.984706573486 329.944268188477 225.626341552734 196.009637145996 196.194431304932 196.859209899902 304.833864440918 312.199648132324 307.002299194336 292.493941040039 283.848994445801 279.652582397461 300.2145703125 175.036867218018 -9999 -9999 -9999 -9999 -9999 -9999 -9999 288.631597900391 299.225596618652 305.903534545898 308.498085021973 312.063752746582 309.150098876953 349.496232910156 -9999 -9999 -9999 -9999 -9999 -9999 301.32789642334 309.763591918945 314.02529296875 312.765375366211 311.781719970703 308.551379699707 307.269014282227 363.630401916504 316.269047241211 317.412767944336 328.963180847168 343.298663635254 334.279892578125 350.306460571289 313.868067626953 353.96642578125 360.221923828125 354.993134765625 454.976234436035 354.321326293945 348.04130859375 338.347412109375 377.27185546875 381.208447265625 375.543061523437 372.535205383301 388.54546875 388.44685546875 386.60361328125 393.69873046875 390.940986328125 361.39681640625 395.63197265625 448.352314453125 366.5438671875 385.0189453125 363.916845703125 375.674153137207 374.12431640625 370.200087890625 371.32177734375 372.707080078125 374.503916015625 373.654658203125 369.712470703125 348.183017578125 344.555302734375 348.07271484375 343.52806640625 379.663125 365.2391015625 376.374052734375 404.145322265625 410.8144921875 408.346845703125 364.00154296875 407.833212890625 405.885732421875 410.2257421875 396.892705078125 380.42068359375 377.032734375 387.212666015625 376.9158984375 371.4505078125 357.064541015625 338.281259765625 336.097763671875 334.651845703125 333.580341796875 334.024658203125 352.625625 429.654159545898 332.134541015625 342.60703125 335.473212890625 339.1434375 340.659066467285 342.765475158691 332.3780859375 331.2329296875 373.41017578125 394.554814453125 394.53421875 401.817158203125 508.54236328125 488.690419921875 420.17302734375 524.86751953125 416.627548828125 422.8771875 435.72421875 460.1353125 65.7467797851562 468.680625 479.147197265625 478.60623046875 457.01513671875 455.55310546875 449.008125 583.8990234375 533.08716796875 412.41580078125 404.60185546875 381.415355529785 380.253114624023 385.513275146484 509.489626464844 478.28692199707 476.922499694824 384.737813415527 406.808940124512 398.901780395508 395.719145507812 389.308919677734 374.758203735352 468.004342346191 374.607171936035 454.361750793457 460.225071716309 458.988145751953 469.644966430664 488.274024353027 474.33375 470.740256652832 498.062721862793 489.712618103027 503.001120300293 498.593946533203 487.511674804688 497.377716064453 477.621856384277 495.131695861816 495.89564666748 479.56708190918 488.213539123535 521.024963378906 523.271315917969 527.670120849609 516.735104370117 395.106800537109 500.840329284668 495.980090332031 381.672946472168 370.1942578125 368.363356018066 369.869837036133 467.423931884766 369.493118591309 348.329874572754 376.655210266113 386.426293945313 462.486349182129 728.5587890625 752.62875 728.34298828125 206.434702148437 1.70944072723389 526.54453125 540.16681640625 534.12111328125 442.72751953125 442.310859375 410.346416015625 514.3557421875 536.6663671875 566.27373046875 589.60494140625 602.47693359375 595.053446044922 631.108383178711 717.6910546875 783.48515625 806.7343359375 546.7219921875 527.4440625 657.89408203125 1.9339720916748 724.40888671875 656.74294921875 606.581484375 626.61392578125 652.6407421875 595.80427734375 412.38772064209 440.37751739502 441.373529663086 447.916720275879 448.011798706055 454.55656036377 457.615747375488 464.25534576416 473.999933166504 479.336077880859 436.927001953125 550.7405859375 554.62376953125 465.024814453125 446.1191015625 437.784990234375 418.572919921875 404.062412109375 393.89748046875 381.7278515625 380.568544921875 417.506455078125 412.292080078125 408.216357421875 410.084794921875 413.5993359375 314.955498046875 376.597939453125 377.938505859375 415.6252734375 411.623203125 399.713818359375 388.495869140625 396.43869140625 354.80630859375 396.0734765625 398.720390625 401.308330078125 402.4829296875 399.860830078125 413.275078125 588.785859375 617.945625 623.84419921875 642.57703125 640.42939453125 584.124375 152.31732421875 23.9196881103516 172.22876953125 208.151689453125 65.053681640625 307.614287109375 20.5311401367188 329.142919921875 458.114970703125 482.88849609375 426.331083984375 466.413310546875 427.237763671875 440.134599609375 311.171572265625 0.913047122955322 0.712086982727051 0.506872272491455 0.334672794342041 0.312673931121826 0.315818252563477 0.33039041519165 0.247043981552124 0.387322626113892 0.455111246109009 1.80523578643799 1.79708587646484 1.82707019805908 1.87699928283691
0.332012643814087 0.340788431167603 0.227521991729736 0.222512984275818 0.195433673858643 0.204418802261353 0.213128914833069 0.239989042282104 0.33107892036438 -9999 -9999 -9999 -9999 -9999 -9999 -9999 -9999 -9999 -9999 -9999 -9999 -9999 -9999 -9999 -9999 -9999 -9999 -9999 -9999 248.833037109375 310.82865234375 315.103330078125 307.987294921875 301.676572265625 325.187138671875 322.254375 268.065322265625 141.319013671875 154.719829101562 205.72189453125 0.973199501037598 1.87072368621826 30.2179339599609 198.677666015625 148.294907226562 72.1218237304687 15.254094543457 16.4186279296875 8.62969116210937 22.1435723876953 10.4542721557617 115.114987792969 206.2536328125 300.2991796875 338.60712890625 378.65666015625 404.703427734375 428.33150390625 422.78033203125 422.06138671875 413.836787109375 426.9793359375 419.46732421875 434.310791015625 484.190625 449.887119140625 480.4362890625 461.981455078125 446.78853515625 425.46826171875 403.923837890625 393.216123046875 392.101728515625 438.61470703125 464.935927734375 459.033427734375 357.15984375 214.943920898437 388.975458984375 460.708388671875 488.876396484375 495.6055078125 603.61265625 612.72240234375 614.09396484375 320.177578125 362.623564453125 408.334599609375 515.1087890625 313.03341796875 235.692231445313 231.489125976562 268.26908203125 275.433603515625 297.415751953125 317.8986328125 310.369658203125 322.268115234375 322.4961328125 340.768916015625 343.7731640625 357.1078125 359.24970703125 373.879234313965 417.373037109375 407.71962890625 391.81119140625 369.3901171875 348.921591796875 330.22962890625 307.00130859375 289.871923828125 280.398046875 280.1199609375 283.19390625 288.49875 294.8769140625 298.82302734375 304.5687890625 305.398447265625 276.93720703125 298.531083984375 316.10103515625 311.1083203125 317.016767578125 320.57431640625 320.8393359375 328.200263671875 336.0646875 341.16111328125 420.181318359375 399.239736328125 371.981162109375 339.630029296875 210.99240234375 289.112431640625 239.723994140625 226.948227539062 245.584951171875 258.37998046875 267.574775390625 298.020791015625 38.5884155273437 38.3863732910156 298.9541015625 215.843583984375 164.451166992187 153.27181640625 91.068427734375 26.1612780761719 20.4530456542969 16.3930151367187 7.06945724487305 3.28670150756836 6.37367248535156 9.02086395263672 5.4360205078125 6.27644668579102 7.25491241455078 2.64630500793457 21.8479010009766 49.6022937011719 64.53890625 105.394467773437 169.170498046875 165.890170898438 134.589975585938 193.342060546875 88.5546240234375 46.2652478027344 34.7374841308594 37.9770080566406 14.2860150146484 5.0535173034668 3.31662826538086 1.90250003814697 1.07757659912109 2.14115592956543 1.52238544464111 2.18976974487305 2.12710716247559 0.906076011657715 0.805202522277832 7.05464126586914 -9999 -9999 28.974228515625 3.39648399353027 0.556606349945068 0.508421459197998 0.510068836212158 0.474767990112305 0.46681191444397 0.449636878967285 0.444252948760986 0.468657846450806 0.532936134338379 -9999 -9999 -9999 -9999 -9999 -9999 -9999 -9999 4.70639053344727 4.48873718261719 5.3984358215332 10.5386471557617 17.0468316650391 10.7251062011719 69.4314990234375 90.1094091796875 -9999 6.28627487182617 82.7033203125 53.3237805175781 2.37906875610352 0.722126655578613 0.566193695068359 0.409867086410522 0.41456657409668 0.440423898696899 0.555470638275146 1.34706550598145 1.3791695022583 1.75558696746826 1.62497806549072 0.85533411026001 0.65780611038208 0.489667339324951 0.748033046722412 -9999 -9999 -9999 -9999 -9999 -9999 -9999 -9999 -9999 -9999 -9999 -9999 -9999 -9999 -9999 -9999 -9999 -9999 -9999 -9999 265.842861328125 48.4431848144531 1.96921348571777 155.653857421875 247.264365234375 269.246572265625 264.17630859375 262.215732421875 0.458579578399658 0.195672569274902 0.29044469833374 0.431566371917725 0.806315746307373 1.33312099456787 1.64897380828857 1.7169828414917 1.69351444244385 1.73800128936768 1.84318771362305 1.89537460327148 2.15054992675781 2.26316345214844 2.29177368164062 2.33337524414062 2.34143920898437 2.33691421508789 2.31633590698242 2.29996147155762 2.27273277282715 2.27706642150879 2.30428184509277 2.32167205810547 2.3055054473877 2.26555961608887 2.25258224487305 2.14688346862793 2.0356022644043 1.96587501525879 2.26954376220703 1.81623229980469 0.556141204833984 0.397321901321411 0.213451509475708 0.295203380584717 -9999 -9999 -9999 -9999 -9999 -9999 -9999 -9999 -9999 -9999 -9999 -9999 -9999 -9999 -9999 -9999 -9999 -9999 -9999 -9999 -9999 -9999 -9999 -9999 -9999 -9999 -9999 -9999 -9999 -9999 -9999 -9999 -9999 -9999 -9999 -9999 -9999 -9999 -9999 -9999 -9999 -9999 -9999 -9999 -9999 -9999 -9999 -9999 -9999 -9999 -9999 -9999 -9999 -9999 -9999 -9999 -9999 -9999 -9999 -9999 -9999 -9999 -9999 -9999 -9999 -9999 -9999 -9999 -9999 -9999 -9999 -9999 -9999 -9999 -9999 -9999 -9999 -9999 -9999 -9999 -9999 -9999 -9999 -9999 -9999 -9999 -9999 -9999 -9999 108.909161911011 111.596494674683 -9999 -9999 190.234551544189 205.675581665039 237.689897003174 379.785621337891 309.8089453125 334.6430859375 76.0805126953125 299.316064453125 349.010947265625 322.323491821289 337.166512756348 302.508657531738 299.306807556152 307.209646911621 316.784712524414 315.165388183594 311.716642456055 312.97625793457 356.691549682617 230.811862335205 191.463078460693 195.551798400879 194.418636932373 239.769174957275 209.893897705078 208.144901733398 199.80094619751 198.969183654785 195.849043121338 226.304655303955 326.019042663574 330.75036529541 335.033124389648 332.230803222656 339.276637573242 360.334228820801 346.167452087402 340.846443786621 383.80829864502 351.584777526855 368.348249816895 198.856476287842 265.677805480957 278.009027709961 303.877853393555 292.659656066895 307.135445251465 288.850023193359 289.925584716797 290.117161560059 290.80334564209 208.324257659912 211.731159210205 163.516757354736 -9999 -9999 -9999 -9999 195.767328491211 235.142130432129 237.875401153564 240.272936553955 299.515333557129 295.401612854004 278.357346496582 -9999 278.450430908203 284.421942443848 310.91646697998 307.10212097168 316.333731994629 307.274754638672 307.987102661133 317.508148498535 306.588268432617 305.894984436035 352.229933166504 353.58030670166 305.865466918945 309.776643676758 315.969642333984 335.365883789062 338.095302429199 343.636649780273 349.292139587402 352.635655517578 352.38688659668 351.720672912598 360.490215454102 363.363112792969 362.141323242188 474.647636413574 383.250094299316 370.13908996582 367.119541625977 368.603635253906 374.382301025391 372.288641967773 471.615333557129 373.251934204102 374.513724975586 367.526623535156 383.381220703125 398.7549609375 448.135693359375 369.889658203125 362.858263549805 360.97591003418 353.997177429199 360.962556152344 365.848330078125 360.574072265625 362.45162109375 366.7344140625 369.07640625 345.431015625 347.559375 352.05744140625 -9999 -9999 380.232041015625 364.97232421875 399.865810546875 403.55560546875 407.00818359375 407.429443359375 467.363876953125 465.297802734375 464.31205078125 392.667626953125 374.6155078125 377.384853515625 372.022001953125 371.59541015625 366.18650390625 373.373232421875 365.4662109375 352.622578125 404.93630859375 444.752388000488 336.60580078125 345.880978088379 336.49597869873 331.59869934082 330.873299560547 432.474670410156 326.890036010742 337.829033203125 354.06357421875 352.938720703125 365.671142578125 381.021298828125 384.858046875 396.111357421875 370.23193359375 398.16521484375 505.13173828125 415.449697265625 421.043701171875 418.5038671875 527.52802734375 543.34845703125 449.827060546875 565.14943359375 583.49958984375 579.4421484375 477.876005859375 465.288603515625 583.02205078125 557.63654296875 566.396953125 520.681640625 498.12826171875 359.028599853516 350.209811096191 349.392535400391 353.768227844238 456.473235168457 406.5052734375 500.799210205078 519.677578125 404.77236328125 397.730009765625 493.129731445312 514.78447265625 499.24517578125 500.363426513672 478.852407531738 487.89546295166 496.94384765625 494.019698181152 421.711630554199 491.013987121582 482.217887878418 497.073446960449 494.849904785156 517.978828125 506.016771240234 508.943869628906 516.00553527832 512.030670776367 508.317506103516 492.881566772461 470.298611755371 477.13552734375 497.088704223633 520.530869750977 500.083871154785 503.048553771973 506.892266235352 514.650509033203 485.218946228027 502.214026794434 501.69848236084 493.935888977051 478.211270141602 459.454262695312 464.498102416992 334.084757080078 365.361512145996 342.749190673828 362.204557800293 365.717444458008 504.226505126953 732.75380859375 749.1608203125 730.50908203125 321.4246875 367.58203125 498.62208984375 454.119697265625 472.571865234375 427.123212890625 554.12244140625 562.19390625 514.59240234375 479.12373046875 479.16240234375 486.268212890625 506.8651171875 534.6816796875 605.1364453125 593.715278320312 583.361306762695 633.736983032227 518.1699609375 556.99986328125 518.5133203125 49.4852233886719 726.07681640625 646.28443359375 750.89419921875 523.664741821289 492.62451965332 582.54826171875 525.819973754883 464.475201416016 450.063371887207 438.665380554199 430.849039306641 434.955418395996 438.440781555176 399.36934753418 445.674053649902 455.277367858887 433.476370239258 581.38640625 728.10556640625 543.236953125 523.10015625 417.630673828125 390.91734375 377.341083984375 410.62974609375 404.230751953125 401.558759765625 399.291416015625 353.47400390625 394.070947265625 394.8420703125 403.150693359375 407.026669921875 414.8878125 415.854638671875 435.756064453125 450.66181640625 470.292216796875 470.04580078125 453.205576171875 498.6609375 635.89669921875 478.32345703125 412.41890625 427.307958984375 411.07611328125 407.022509765625 436.432294921875 481.559501953125 494.67544921875 639.02296875 506.05951171875 506.6335546875 639.0544921875 507.33708984375 345.390849609375 244.248500976562 36.7657873535156 12.6562014770508 0.9793798828125 0.622984256744385 83.9445629882812 328.211953125 432.33146484375 415.37431640625 422.736005859375 324.244423828125 230.713740234375 32.399794921875 26.25662109375 2.12729690551758 0.531491317749023 0.492543983459473 0.304656801223755 0.241533250808716 0.298090038299561 0.333012914657593 0.363015117645264 0.488406257629394 1.73712158203125 1.15449691772461 1.78236499786377
0.236489267349243 0.208420100212097 0.209237337112427 0.198285884857178 0.186301889419556 0.209471139907837 0.24921329498291 0.286468849182129 0.321977033615112 0.4146240234375 0.360516986846924 1.5172029876709 1.9186466217041 -9999 -9999 -9999 -9999 -9999 -9999 -9999 -9999 -9999 -9999 -9999 -9999 -9999 -9999 -9999 -9999 -9999 -9999 -9999 338.14189453125 320.053154296875 334.527421875 340.273388671875 327.28259765625 337.5324609375 339.52669921875 304.480810546875 345.888603515625 347.67703125 355.02263671875 351.177216796875 317.7376171875 372.40048828125 346.9290234375 174.370400390625 48.0070861816406 97.5855102539062 237.558662109375 347.24625 340.945078125 378.133828125 394.0925390625 396.186123046875 367.9048828125 361.653030395508 350.384438781738 350.76988861084 431.38646484375 447.337734375 465.801884765625 475.024833984375 404.069443359375 431.072373046875 371.502275390625 336.562412109375 302.229345703125 291.847705078125 285.98841796875 270.821923828125 301.1370703125 358.018681640625 415.4323828125 440.660068359375 453.79599609375 469.820302734375 481.1818359375 491.72560546875 484.7450390625 614.74130859375 622.05123046875 625.92703125 506.8590234375 482.7558984375 474.18416015625 472.352314453125 504.81017578125 407.543466796875 276.86947265625 246.04201171875 252.660701293945 254.625625305176 259.06125 258.18380859375 276.203876953125 310.827333984375 340.28642578125 341.61890625 360.748125 357.000791015625 343.89720703125 341.398095703125 347.120244140625 372.971200561523 383.862167358398 384.29390625 393.34359375 403.699833984375 400.45828125 389.480625 345.11501953125 314.0211328125 278.922890625 284.560517578125 288.865810546875 292.813564453125 295.388349609375 297.91341796875 303.957216796875 307.8826171875 317.893564453125 322.5296484375 323.758447265625 327.05794921875 329.194189453125 330.12931640625 337.076923828125 336.229306640625 415.151484375 399.912626953125 382.976103515625 372.813251953125 370.636083984375 385.32228515625 374.83798828125 415.27728515625 472.73560546875 479.02318359375 475.9189453125 475.108212890625 467.982861328125 441.76623046875 412.2158203125 362.874375 307.7886328125 274.735927734375 117.877280273437 72.7373803710937 53.0941040039062 29.2864874267578 18.8517279052734 8.07052276611328 3.73546531677246 2.24194793701172 1.50527687072754 1.4404821395874 1.49717479705811 1.24104125976562 22.7343841552734 25.6582580566406 27.5066290283203 74.297080078125 123.916259765625 160.052270507812 158.889638671875 114.766435546875 112.405305175781 113.540046386719 42.4980212402344 29.3070666503906 31.9778137207031 35.5945422363281 7.85531066894531 4.52065155029297 2.24490623474121 1.57005718231201 1.15737327575684 1.11940658569336 0.780199184417725 0.698685779571533 0.942305202484131 0.866605682373047 6.34828216552734 129.927055664062 13.9377722167969 1.03565620422363 0.817891387939453 0.781662940979004 0.7575022315979 0.574417877197266 0.525913066864014 0.511383762359619 0.49889986038208 0.526124668121338 0.516521530151367 0.836360321044922 -9999 -9999 -9999 -9999 -9999 -9999 -9999 3.33552017211914 7.12837005615234 10.5688165283203 14.5745745849609 6.46966186523438 -9999 -9999 -9999 -9999 13.3344094848633 93.7391015625 62.5601147460937 12.2405090332031 0.882992362976074 0.576245899200439 0.457611722946167 0.408414630889893 0.417176513671875 0.49088939666748 0.496517486572266 1.28336494445801 2.34725006103516 2.38330101013184 2.43336524963379 1.59601043701172 1.19796546936035 0.665242137908935 0.34022123336792 0.355605697631836 0.362087659835815 -9999 -9999 -9999 -9999 -9999 -9999 -9999 -9999 -9999 -9999 -9999 -9999 -9999 -9999 -9999 -9999 -9999 11.8927322387695 0.208488864898682 0.158734259605408 3.87300933837891 152.848696289063 247.685185546875 238.63025390625 223.260688476562 0.729428558349609 0.162259783744812 0.189993166923523 0.279629945755005 0.467455558776855 0.929368686676025 1.24865203857422 1.38743488311768 1.45228031158447 1.4762670135498 1.66666809082031 1.90308746337891 2.15234115600586 2.18773590087891 2.2081908416748 2.21236839294434 2.20003578186035 2.16866271972656 2.11599746704102 2.06203514099121 2.03399253845215 2.05560699462891 2.0771019744873 2.06164993286133 2.0902759552002 2.05672210693359 2.10058662414551 2.13110023498535 2.11111381530762 2.00582954406738 2.2850244140625 1.75043792724609 0.229788851737976 0.279842462539673 -9999 -9999 -9999 -9999 -9999 -9999 -9999 -9999 -9999 -9999 -9999 -9999 -9999 -9999 -9999 -9999 -9999 -9999 -9999 -9999 -9999 -9999 -9999 -9999 -9999 -9999 -9999 -9999 -9999 -9999 -9999 -9999 -9999 -9999 -9999 -9999 -9999 -9999 -9999 -9999 -9999 -9999 -9999 -9999 -9999 -9999 -9999 -9999 -9999 -9999 -9999 -9999 -9999 -9999 -9999 -9999 -9999 -9999 -9999 -9999 -9999 -9999 -9999 -9999 -9999 -9999 -9999 -9999 -9999 -9999 -9999 -9999 -9999 -9999 -9999 -9999 -9999 -9999 -9999 -9999 -9999 -9999 -9999 -9999 -9999 -9999 -9999 -9999 -9999 -9999 -9999 -9999 111.844168395996 174.640284118652 126.478769073486 142.508608703613 155.846961364746 176.178080291748 223.4398828125 303.767373046875 144.312700195312 0.489594669342041 359.227470703125 347.34884765625 319.98746887207 329.560480041504 298.06825012207 344.903848571777 362.552030639648 316.191552429199 211.47470123291 207.936118927002 206.780630493164 210.606049346924 185.304914703369 185.459390716553 190.400296783447 193.913530883789 224.573182525635 191.216953125 199.551497497559 202.966692352295 199.123010101318 194.756834564209 228.436079864502 225.171947021484 292.749900512695 334.893935852051 295.985799865723 343.308694152832 314.009129333496 354.537465820312 335.387999267578 197.831414794922 222.4754296875 196.817682952881 199.298045654297 228.494465332031 191.156120452881 194.924709777832 211.596744232178 208.985894165039 339.090196838379 355.342203369141 303.781143493652 303.052208862305 208.841463775635 210.721083068848 204.294572753906 -9999 -9999 -9999 -9999 164.672260894775 283.028153686523 239.123792724609 237.197736968994 185.780654296875 -9999 -9999 -9999 303.296476135254 295.818664855957 310.193000793457 305.86978729248 314.543314819336 297.412731628418 345.171681518555 296.072751159668 364.739801330566 348.223315429687 312.176807556152 311.151670532227 304.054203186035 314.127592163086 310.508508911133 329.785532226563 318.98018737793 323.866590270996 328.213429870605 332.953211975098 333.28388671875 338.547974853516 350.67076171875 352.347791748047 351.224555053711 355.948687133789 364.372932128906 356.017359924316 355.036272583008 352.013521728516 354.895754699707 356.514112243652 357.080776062012 365.200600891113 367.89333984375 449.771923828125 449.467822265625 393.125068359375 451.510927734375 373.946184997559 353.333773498535 347.805236206055 345.429544372559 347.01587677002 354.531997375488 357.750494384766 360.567528991699 346.553657226563 349.400299987793 346.977899780273 360.908291015625 -9999 -9999 483.945846557617 489.472122192383 367.1625 392.891396484375 509.623565673828 512.54508972168 515.776596069336 585.874099731445 511.573600769043 508.670883178711 459.49177734375 452.8208203125 568.526458740234 389.100605163574 382.542973022461 374.505809326172 369.200481262207 358.259664001465 351.908745117187 349.077057495117 340.26313293457 340.941975402832 330.678882751465 327.502924804687 320.937105102539 317.843687438965 318.969190063477 321.03599029541 405.85986328125 406.991455078125 407.642783203125 344.178076171875 328.720031433105 321.58119140625 335.13169921875 378.8630859375 399.641279296875 454.763701171875 392.60455078125 425.176904296875 394.85619140625 407.187978515625 400.350263671875 394.165283203125 470.02119140625 522.27216796875 471.158994140625 525.5169140625 605.22474609375 598.2427734375 511.745390625 550.554609375 474.543303222656 431.811515808105 426.894930725098 365.312568054199 360.255525512695 384.504845581055 380.914071350098 384.030269165039 488.470827941895 381.716689453125 384.348779296875 516.245059204102 493.793769836426 480.166828308105 395.778966064453 463.69614440918 466.434415283203 463.484627380371 465.874730529785 460.819077758789 461.029748840332 484.525480957031 487.151422119141 523.249442138672 487.928666381836 499.438775939941 490.82872467041 430.426549072266 533.549514770508 525.967651977539 525.764685058594 515.357297973633 507.719663085937 505.115746765137 494.492099304199 488.020542297363 483.458439331055 501.110851135254 497.308046264648 500.048432006836 487.757543334961 383.388799438477 482.537565307617 478.214382019043 470.23208404541 666.018511962891 454.580971984863 357.507798156738 365.264137573242 339.90979888916 357.947479248047 366.050415344238 606.034324951172 730.8975 754.21359375 35.8564855957031 629.21326171875 368.97421875 523.40759765625 442.188427734375 457.098046875 618.790078125 598.357734375 553.473515625 501.129375 486.97892578125 475.147412109375 521.14294921875 540.12990234375 568.26732421875 481.7476171875 346.51166015625 415.031279296875 606.77818359375 626.249926757813 662.4432421875 601.42224609375 552.915 540.58353515625 566.7759375 523.293046875 486.679202270508 472.53779296875 549.95619140625 740.215078125 650.83189453125 772.739765625 761.72671875 734.010703125 498.891357421875 456.544022827148 444.424770812988 429.529754333496 433.620936584473 415.084449462891 512.9152734375 691.3669921875 653.32376953125 474.0931640625 439.81259765625 418.03388671875 364.982373046875 396.97166015625 393.8015625 386.234765625 380.345947265625 376.962626953125 507.7550390625 537.6448828125 392.097421875 525.636328125 427.567880859375 594.12673828125 614.533828125 634.14767578125 666.72533203125 522.0038671875 502.38826171875 492.2705859375 496.87939453125 665.583984375 663.91400390625 634.15060546875 456.35296875 430.851884765625 461.48484375 484.6920703125 485.903935546875 627.7864453125 484.44966796875 494.683359375 401.4071484375 270.83296875 12.5444284057617 271.164990234375 422.642578125 375.82470703125 389.919052734375 333.0113671875 39.8036352539063 1.44338733673096 307.954833984375 1.25952850341797 201.073725585937 292.831904296875 254.019345703125 330.05630859375 452.5100390625 395.5219921875 15.4593804931641 2.68066932678223 2.88495597839355 0.340716876983643 0.341292514801025 0.441150398254395 0.458735790252686 0.258043956756592 0.296314859390259 0.369257183074951 0.406315498352051
0.234722828865051 0.187200021743774 0.195546855926514 0.189009375572205 0.225209312438965 0.18195216178894 0.19774347782135 0.184315567016602 0.223940348625183 0.705140132904053 113.691481933594 33.0461462402344 76.794111328125 50.0840002441406 11.9716744995117 10.3065106201172 9.98965301513672 0.212134594917297 -9999 -9999 -9999 -9999 -9999 -9999 -9999 -9999 -9999 -9999 -9999 -9999 -9999 328.2085546875 328.7977734375 -9999 306.155859375 312.60703125 313.455732421875 329.72056640625 342.180703125 358.365380859375 362.477958984375 367.061748046875 383.3804296875 382.75705078125 393.8562890625 387.5208984375 385.3484765625 366.883681640625 390.31763671875 379.4898046875 356.123647155762 350.487946472168 361.755631713867 353.34543548584 348.816475524902 333.948740844727 320.549993591309 325.056143188477 342.491599731445 345.922973327637 365.113649597168 379.057126464844 369.863643493652 331.668731689453 291.061842956543 257.26388671875 224.854599609375 214.10080078125 208.92884765625 208.565830078125 220.088173828125 242.123818359375 265.09037109375 312.93140625 363.8530078125 387.57615234375 429.908671875 456.33451171875 466.672705078125 448.207177734375 597.8626171875 598.1602734375 624.77484375 618.39181640625 539.129262084961 508.150250244141 536.15950378418 645.78849609375 640.08240234375 498.838969116211 413.884775390625 291.236651916504 246.08267578125 241.234657745361 238.094758300781 249.413139953613 279.238612060547 313.445577392578 312.722806091309 301.513853759766 297.556270751953 300.138766479492 295.839390563965 290.548745727539 313.289590759277 319.37923828125 327.0413671875 345.20595703125 376.585782165527 370.560029296875 386.11171875 403.87125 416.898251953125 403.880478515625 318.9214453125 283.602861328125 265.09400390625 261.061259765625 261.046201171875 262.5542578125 266.918408203125 269.7348046875 276.683935546875 280.10220703125 285.899501953125 313.04373046875 396.413173828125 398.8939453125 400.807587890625 401.307451171875 399.54779296875 396.689794921875 408.237216796875 411.177041015625 407.623447265625 410.618876953125 415.22337890625 429.0090234375 458.206640625 475.90365234375 494.30525390625 495.2194921875 488.016533203125 484.096435546875 499.4792578125 483.774287109375 457.574501953125 426.2066015625 362.167412109375 236.610439453125 116.626538085937 73.3660180664062 44.9275415039062 29.0678778076172 23.18044921875 17.0764874267578 9.04827209472656 7.66154022216797 12.8339099121094 25.0932916259766 37.5040869140625 46.6557531738281 58.4486169433594 59.2571008300781 80.2476196289062 110.673325195313 125.85515625 152.336118164062 160.612338867188 119.43544921875 24.6140130615234 11.1351800537109 9.40601806640625 5.98149993896484 6.47134002685547 22.6494232177734 4.65176605224609 3.57596580505371 0.867863101959228 0.737115440368652 0.838735427856445 1.32399341583252 1.01849235534668 0.838895015716553 1.34602924346924 5.3420475769043 12.5297369384766 9.13931030273437 5.30789840698242 4.96556579589844 2.97850708007813 5.38694732666016 4.15281692504883 1.68552898406982 1.09990001678467 4.62855377197266 1.35766983032227 -9999 -9999 -9999 -9999 -9999 -9999 -9999 -9999 -9999 -9999 -9999 -9999 -9999 -9999 -9999 -9999 8.64221099853516 62.3871459960938 47.2548413085937 18.9845599365234 12.8952584838867 0.886336841583252 11.2757382202148 1.49974285125732 0.759245624542236 0.522115516662598 0.468756723403931 0.392773933410645 0.375314884185791 0.377831926345825 1.03799995422363 1.03707046508789 2.22485366821289 1.77724811553955 1.82284481048584 0.854043216705322 0.720172863006592 0.402284002304077 0.466239023208618 0.296185684204102 0.3058971118927 -9999 -9999 -9999 -9999 -9999 -9999 -9999 -9999 -9999 -9999 -9999 -9999 -9999 -9999 127.85390625 143.5865625 10.8226300048828 152.27712890625 205.166704101562 218.0450390625 227.086040039062 205.746650390625 156.728627929687 0.274583387374878 0.129860143661499 0.189662518501282 0.312472229003906 0.7214186668396 0.920800037384033 1.49975704193115 1.24183490753174 1.40107292175293 1.82339996337891 2.03387649536133 2.14348022460937 2.15221046447754 2.07949722290039 2.11170867919922 2.00804718017578 1.93138641357422 1.86035018920898 2.30147163391113 2.28149116516113 2.33649467468262 2.1107844543457 1.84974620819092 1.89837844848633 2.12348258972168 2.07292121887207 1.93932220458984 1.81686435699463 1.56638935089111 1.41550518035889 0.217375288009644 0.194472999572754 -9999 -9999 -9999 -9999 -9999 -9999 -9999 -9999 -9999 -9999 -9999 -9999 -9999 -9999 -9999 -9999 -9999 -9999 -9999 -9999 -9999 -9999 -9999 -9999 -9999 -9999 -9999 -9999 -9999 -9999 133.879961700439 -9999 -9999 -9999 -9999 -9999 -9999 -9999 -9999 -9999 -9999 -9999 -9999 -9999 -9999 -9999 -9999 -9999 -9999 -9999 -9999 -9999 -9999 -9999 -9999 -9999 -9999 -9999 -9999 -9999 -9999 -9999 -9999 -9999 -9999 -9999 -9999 -9999 -9999 -9999 -9999 -9999 -9999 -9999 -9999 -9999 -9999 -9999 -9999 -9999 -9999 -9999 -9999 -9999 -9999 -9999 -9999 -9999 -9999 -9999 -9999 -9999 -9999 170.272280731201 212.145054016113 385.611676025391 404.727426757812 403.065980224609 354.3873046875 369.533642578125 357.092431640625 380.548974609375 285.064137268066 285.792256164551 284.551765136719 293.168795471191 299.271821594238 311.240736694336 315.662986450195 245.916598205566 230.587172698975 205.909924163818 205.846296844482 193.488699188232 192.843196105957 213.847205657959 174.311497650146 209.672697601318 177.236692657471 181.5825050354 183.342211303711 233.568109588623 197.839103851318 343.693902282715 343.205911560059 345.195670166016 341.987777709961 230.421412353516 227.781301574707 264.766780700684 231.048848419189 228.154198150635 231.085163726807 227.566415863037 216.876059417725 218.271192626953 221.104285125732 224.096853790283 211.695780487061 212.673680419922 206.204978485107 197.97060333252 196.395993347168 207.50025970459 205.335495758057 208.914970550537 213.944972991943 237.628444976807 236.20587890625 171.566912384033 -9999 -9999 161.730373535156 -9999 -9999 164.743652801514 284.279551391602 238.684987792969 284.980146789551 279.996067199707 283.421579589844 288.819085693359 284.643761901855 296.464334106445 302.493279418945 299.308861999512 300.256383361816 297.486147766113 315.461983337402 313.998464355469 313.732323303223 296.273542785645 285.369916992187 314.078587646484 302.755946044922 303.761354370117 307.206897583008 314.272158508301 315.258110046387 319.415820007324 319.020883483887 372.406772460937 325.077261657715 333.02194519043 330.322738952637 326.124121398926 331.764414367676 395.335417785645 394.651983032227 394.085530700684 338.900674438477 341.072311706543 344.077901916504 353.645051879883 379.669306640625 403.027177734375 396.62958984375 434.727890625 363.025851745605 354.721398925781 404.084657592773 401.613464355469 400.015923156738 393.669868469238 396.916463012695 398.868758239746 397.542766113281 347.69650177002 400.561226806641 399.960120849609 359.155927734375 -9999 361.161884765625 346.46468170166 351.723905639648 355.300600891113 364.38921661377 381.476112670898 373.806845397949 394.622072753906 397.440043945312 400.808152770996 399.148827209473 451.692756958008 391.093415222168 391.841504516602 388.730473022461 375.103712768555 374.417558898926 364.982165222168 408.713318481445 403.089370422363 349.51537902832 347.73118560791 338.988229980469 333.247057800293 328.748793640137 325.942272949219 320.661265869141 312.936317138672 355.712214660645 304.863623657227 311.101608581543 310.975834350586 316.363974609375 433.612403869629 330.161465148926 321.79248046875 336.479912109375 324.091461181641 344.102578125 380.559140625 395.4459375 426.84380859375 398.006194152832 439.7312109375 420.383232421875 515.75443359375 438.76470703125 412.388566589355 508.23732421875 445.925302734375 419.79603515625 455.474765625 452.88533203125 409.1316796875 519.77513671875 460.11114074707 341.523262023926 381.442214355469 378.772163085938 356.794513549805 361.345317077637 361.973765258789 369.13038848877 465.727142944336 501.114385986328 382.277919616699 502.600322570801 555.47595703125 495.675398254395 510.55962890625 485.462669677734 537.00140625 497.24349609375 525.2334375 458.483749694824 443.038837280273 448.937204589844 488.930479431152 419.67066192627 499.225144042969 502.786279907227 508.778184814453 518.053271484375 517.912481689453 526.111825561523 515.841481933594 508.72567565918 496.191969909668 490.183538818359 491.230881958008 472.184409484863 461.750163574219 363.958750305176 355.478793640137 355.615202636719 361.627168579102 363.577530212402 362.803730163574 457.628950195312 641.332139282227 647.190505371094 440.059743347168 441.061737670898 348.138901977539 359.570821838379 342.302621154785 425.351741638184 677.3670703125 747.4796484375 772.0058203125 776.65353515625 765.97623046875 603.9948046875 543.21369140625 510.49294921875 500.9248828125 497.43544921875 615.38548828125 530.803630371094 538.07115234375 509.54724609375 519.9397265625 522.50865234375 499.275 592.57283203125 1066.68796875 731.376328125 1127.875546875 709.634223632812 718.35732421875 734.99384765625 553.0716796875 609.35572265625 478.328701171875 1.45682018280029 5.72143341064453 584.725546875 478.333857421875 442.786025390625 500.19814453125 626.71669921875 726.48064453125 909.52857421875 11.6557360839844 0.927432289123535 659.085703125 550.1497265625 445.4206640625 397.563703308105 421.619029541016 373.918298950195 377.001263122559 404.918583984375 415.480805969238 395.402548828125 393.4721484375 393.497314453125 348.519052734375 343.409560546875 379.09962890625 521.73416015625 516.65865234375 525.810234375 402.598505859375 404.893212890625 381.05806640625 427.455673828125 462.14583984375 661.04466796875 632.71037109375 623.5887890625 659.007890625 664.497421875 496.9775390625 629.56224609375 662.21548828125 644.3858203125 644.68376953125 631.8036328125 439.73501953125 441.06064453125 431.59546875 441.2503125 460.987705078125 613.9819921875 477.21421875 489.710947265625 416.54912109375 170.363715820313 364.539052734375 11.8231246948242 30.7802233886719 214.39037109375 339.98853515625 453.623642578125 486.38607421875 573.9290625 388.10115234375 317.914365234375 391.815966796875 422.31890625 469.57587890625 475.663505859375 467.01796875 386.920517578125 163.544326171875 12.9593811035156 301.89240234375 174.384609375 22.0747998046875 0.252462787628174 0.24928822517395 0.232869486808777 0.222009673118591 0.188332843780518
0.991258163452148 147.441430664062 178.483491210938 81.8680810546875 0.312996397018433 0.22440363407135 0.282742738723755 0.25844066619873 0.287875528335571 1.76841957092285 3.39572570800781 154.827026367188 158.521611328125 0.274022455215454 0.438643255233765 0.190396914482117 9.69410247802734 10.4162933349609 36.1097937011719 237.773452148437 0.859254684448242 -9999 77.1859057617187 -9999 -9999 -9999 267.27521484375 286.91912109375 322.9109765625 323.177578125 330.146806640625 322.27716796875 315.160341796875 306.154130859375 298.515205078125 -9999 304.461533203125 311.256357421875 324.0258984375 345.628447265625 343.77966796875 365.368505859375 343.275673828125 355.282080688477 382.959287109375 395.614189453125 389.526650390625 364.257671813965 361.42296295166 341.331292419434 342.642510681152 342.992732849121 336.331079406738 323.357299804688 320.579027709961 311.765979309082 308.609085388184 311.796584472656 339.157510070801 349.130503234863 316.747309570312 277.686933288574 275.045402526855 263.387101135254 246.268104400635 220.022333679199 202.0112109375 218.305576171875 229.845922851563 245.9951953125 276.079633483887 284.154562683105 308.943687744141 343.789675598145 352.157000427246 375.885609741211 405.584945068359 465.182958984375 486.506337890625 394.176474609375 346.730859375 526.4784375 617.08599609375 522.339021606445 484.036281738281 481.572279052734 500.932567749023 521.3316796875 628.99705078125 499.970967407227 504.091848449707 432.687554626465 398.09254119873 374.867633056641 341.056148071289 287.525602111816 297.448170776367 301.585426940918 271.874913024902 268.060778503418 262.835150756836 256.64487121582 252.991058807373 258.108571472168 263.046214599609 275.201389160156 288.314387512207 318.843476257324 355.129538269043 346.06146697998 343.961735229492 347.81780456543 345.28869140625 347.470090026855 332.683798828125 304.615810546875 279.4339453125 258.66521484375 269.8241015625 236.713095703125 237.574204101562 246.756357421875 253.020732421875 246.9718359375 331.6875 358.93107421875 363.416220703125 366.535224609375 376.107568359375 389.2571484375 432.455888671875 513.25353515625 524.23833984375 512.5594921875 507.11947265625 504.895546875 500.5688671875 507.76001953125 511.50134765625 516.9084375 524.592421875 518.2659375 517.282734375 514.981875 520.5249609375 514.8277734375 502.863515625 486.505869140625 457.4387109375 444.47326171875 389.762109375 280.584375 153.695024414062 87.99943359375 58.5432568359375 41.9571203613281 36.003427734375 35.6348474121094 51.77408203125 91.9560571289063 227.687138671875 242.34111328125 268.918388671875 284.214755859375 318.25072265625 331.508349609375 340.773837890625 345.012392578125 351.47841796875 305.0935546875 121.206950683594 69.29958984375 21.3557354736328 7.54396224975586 6.01666030883789 16.6844036865234 18.0298114013672 12.8381890869141 5.73601089477539 2.91804611206055 3.24930519104004 1.86248977661133 1.83369930267334 2.17222801208496 2.95110008239746 8.22807037353516 34.1331042480469 157.157475585938 -9999 9.34497711181641 69.8889038085938 13.6695007324219 6.53411727905273 11.6726989746094 -9999 -9999 -9999 -9999 -9999 -9999 -9999 -9999 -9999 -9999 -9999 -9999 -9999 -9999 -9999 -9999 -9999 54.7335681152344 19.3964300537109 16.4688940429687 15.9685107421875 12.6558947753906 12.8800625610352 16.8357861328125 1.0616467666626 2.20172950744629 5.01425811767578 0.723194675445557 0.725249919891357 0.503183097839355 0.482962131500244 0.492346572875977 0.335414314270019 0.445267467498779 0.621071605682373 0.609777030944824 0.373629484176636 0.455620994567871 0.546623783111572 1.09145462036133 0.336849517822266 0.288079891204834 0.340666179656982 -9999 -9999 -9999 -9999 -9999 -9999 -9999 -9999 -9999 -9999 -9999 -9999 -9999 -9999 -9999 150.794223632813 0.821253662109375 0.181537299156189 0.322161827087402 0.220993266105652 0.283122539520264 0.153341317176819 0.153350286483765 0.209072313308716 0.144765357971191 0.227996006011963 0.45531005859375 0.85879056930542 1.34693161010742 1.09037704467773 1.15128730773926 1.32835590362549 1.70160404205322 2.03601448059082 2.17067390441895 2.13393013000488 2.0568782043457 1.95783782958984 1.91342788696289 2.33266571044922 2.2518042755127 1.99380500793457 1.87006587982178 1.83599876403809 1.77807163238525 0.91560676574707 0.19147451877594 0.218424954414368 0.197961645126343 0.373364667892456 0.279739151000977 0.172845153808594 0.146233191490173 0.228001656532288 -9999 -9999 -9999 -9999 -9999 -9999 -9999 -9999 -9999 -9999 -9999 -9999 -9999 -9999 -9999 -9999 -9999 -9999 -9999 -9999 -9999 129.637018127441 121.864880065918 132.479563293457 112.698975524902 119.711492004395 -9999 -9999 174.715477294922 -9999 173.880045776367 178.947894897461 169.583004760742 183.571451416016 190.936661987305 145.116513061523 165.278529663086 142.167809448242 133.594330444336 142.103867492676 -9999 -9999 -9999 -9999 -9999 -9999 -9999 -9999 -9999 -9999 -9999 -9999 -9999 -9999 -9999 -9999 -9999 -9999 -9999 -9999 -9999 -9999 -9999 -9999 -9999 -9999 -9999 -9999 -9999 -9999 -9999 -9999 137.436733093262 140.297323608398 -9999 -9999 -9999 -9999 -9999 -9999 -9999 -9999 -9999 -9999 -9999 -9999 -9999 -9999 -9999 -9999 -9999 -9999 -9999 107.994534301758 113.636942138672 142.195426940918 151.214856262207 181.338977966309 303.175475463867 444.241413574219 365.3780859375 362.97240234375 345.680700073242 295.03586151123 281.263024291992 287.103716125488 288.457443237305 298.290190429687 311.597303466797 240.492686462402 313.939973144531 210.484202728271 201.258180999756 193.638854827881 186.43130859375 178.710227050781 176.395080871582 172.429340515137 165.247489929199 206.768651275635 175.099150085449 178.921245574951 178.898450317383 226.582926635742 228.269111022949 201.924530639648 267.504779663086 330.97221496582 232.916986999512 230.713536071777 223.846936798096 201.96747756958 230.547111053467 227.125526275635 225.548786315918 220.555386199951 216.032876586914 200.463458862305 281.948030090332 184.637885284424 179.206269378662 205.288183135986 190.105061187744 222.024826812744 194.272076568604 195.906839447021 195.452097473145 195.165910491943 188.706181640625 173.315893249512 192.934165649414 178.830699005127 201.737908630371 226.503271636963 213.012557830811 210.366963500977 210.665900115967 217.092198944092 208.548992614746 269.93304107666 284.89132232666 285.965222167969 289.614819946289 287.364056396484 292.108581848145 291.227920532227 289.716605529785 292.25342010498 292.096527099609 295.533701477051 295.578113708496 293.012506713867 294.483639221191 281.401094970703 339.336216430664 309.072392578125 295.302183837891 295.095863342285 293.416053771973 294.602676086426 357.781371459961 341.172737731934 360.19217010498 313.374789733887 318.944718017578 322.697279663086 325.256058654785 332.510207519531 380.228854064941 329.144606323242 343.592660522461 342.467369384766 401.288167419434 331.02004119873 360.929715270996 473.722412109375 374.726843261719 348.713390808105 340.89218536377 332.857499084473 378.158790893555 384.001446533203 381.071508178711 326.474434204102 331.693807983398 331.387998046875 330.326666564941 336.386126403809 335.344614257813 392.319797058105 395.370313110352 340.891792602539 395.262243347168 393.119579772949 342.642963867188 341.988684082031 341.577312011719 349.792033996582 410.082091369629 355.277881164551 359.706687011719 368.484719238281 375.729502258301 379.85938659668 333.159653320312 375.734608154297 376.03229095459 371.631733703613 370.587502441406 358.991106262207 354.726444396973 352.528220214844 346.519366149902 391.819872436523 334.712933349609 330.280562438965 327.92499206543 326.389507141113 320.617729797363 317.19638671875 310.068404846191 307.344515075684 301.320524597168 341.287635498047 337.852394714355 301.171547241211 305.088252868652 371.389913635254 340.889254760742 389.081510925293 339.008321228027 335.45685333252 340.87587890625 343.009440307617 391.877004089355 431.474326171875 467.234501953125 397.633584594727 422.7151171875 456.42615234375 387.600263671875 493.61326171875 444.844892578125 422.95236328125 432.11850402832 364.503359069824 334.643701171875 349.177906494141 424.532441711426 344.589669799805 428.265380859375 330.099521484375 414.161490783691 421.82559173584 426.120284729004 411.849124145508 338.511176147461 336.188567504883 352.246610412598 365.931287841797 391.708177185059 398.070032958984 513.479476318359 484.995736999512 496.449470214844 510.060234375 525.9169921875 505.40232421875 487.132781066895 459.215040893555 436.455705871582 481.611827087402 492.893621520996 471.116521911621 481.801349487305 479.356501464844 489.849691772461 484.877969055176 480.610044250488 396.207317504883 392.97933380127 385.120755615234 385.793102416992 375.215982055664 364.05612487793 356.966996154785 350.688828735352 344.074729614258 434.095754699707 438.044243774414 436.626013183594 443.969439697266 634.365038452148 423.456064453125 421.562653198242 414.681023254395 416.122275695801 333.242012329102 339.211529846191 324.665738525391 398.112179260254 592.903471069336 978.8105859375 557.36841796875 570.56015625 656.509921875 616.145859375 656.30279296875 647.9534765625 615.92583984375 552.1564453125 587.581254272461 610.057952270508 593.82984375 516.33544921875 859.80240234375 949.96787109375 611.3302734375 735.13470703125 777.40822265625 1108.29 791.78419921875 713.02962890625 798.3092578125 766.52537109375 363.1400390625 381.0483984375 3.1195051574707 1.49204544067383 9.37338043212891 119.907641601562 118.124172363281 502.58197265625 761.4966796875 694.83685546875 614.081821289063 683.0269921875 753.48134765625 670.044375 37.3935827636719 22.921728515625 164.643544921875 563.235234375 694.8462890625 505.869609375 437.70369140625 416.998095703125 397.60482421875 386.869072265625 378.9055078125 387.452216491699 388.180426025391 392.341912536621 414.27919921875 439.545029296875 391.1963671875 477.035419921875 633.7369921875 609.7076953125 448.9383984375 469.773603515625 438.28716796875 504.76623046875 488.517744140625 501.9643359375 501.1246875 500.65505859375 474.1604296875 485.356962890625 488.50716796875 659.64052734375 509.9019140625 506.70779296875 493.39330078125 484.850361328125 507.42380859375 495.41958984375 422.55427734375 516.76880859375 637.5905859375 523.384453125 22.8690545654297 455.15578125 395.961533203125 29.6409722900391 327.107138671875 448.52677734375 509.74552734375 503.72994140625 500.6602734375 467.302587890625 358.976337890625 421.39248046875 448.572099609375 446.662001953125 432.636767578125 449.732109375 450.779765625 310.634853515625 348.968349609375 433.4146875 373.304853515625 233.096381835937 232.841293945312 295.42125 135.563818359375 0.422890949249268 0.37195369720459 0.25911395072937
337.306201171875 -9999 0.338533658981323 229.443618164062 157.6140234375 0.909470043182373 125.639501953125 3.66015335083008 55.1483422851562 38.6268237304688 119.645383300781 88.0221166992187 156.797475585937 131.811796875 195.094321289062 118.001337890625 36.6589599609375 81.3669140625 187.503735351562 0.643572406768799 -9999 -9999 -9999 184.505551757812 295.651318359375 296.854921875 296.44880859375 289.749169921875 291.47443359375 292.428310546875 298.4094140625 314.859609375 327.546767578125 320.663994140625 313.2169921875 318.42650390625 306.142001953125 321.6045703125 331.1883984375 315.2741015625 340.829326171875 322.698251953125 337.157630310059 338.301532287598 353.399485473633 348.988565368652 350.137452392578 344.933245239258 339.361202087402 332.502805480957 337.449421691895 328.304731750488 331.866925048828 323.247175598145 314.220676574707 317.464854125977 334.60105682373 324.213338012695 351.424953918457 305.929094238281 271.136854248047 275.747931518555 287.63521270752 319.935473327637 357.43009185791 377.188247680664 377.973739929199 341.685714111328 366.426922302246 362.549613647461 351.666199951172 333.606343688965 359.187970275879 384.200395202637 382.483001403809 431.430748901367 452.543203125 478.0648828125 500.10052734375 446.6056640625 517.88701171875 570.44818359375 597.440625 555.000380859375 553.703483276367 546.979471435547 476.221360473633 488.824554748535 464.007724914551 478.551220092773 480.841259765625 494.26819519043 493.753677978516 480.23843170166 500.496058959961 481.970830078125 448.563386535645 433.396005249023 445.527886047363 301.182423706055 282.947124023437 274.95857208252 268.253442993164 273.569798583984 355.337852783203 399.41626739502 326.68362487793 360.504928894043 370.437135314941 349.967779541016 345.269116516113 354.53885559082 360.196339416504 345.071255493164 332.4685546875 321.553359375 244.70607421875 231.0069140625 230.97609375 225.391684570312 226.556879882812 226.036157226562 227.6508984375 248.40029296875 328.49701171875 331.346513671875 334.45822265625 340.90330078125 360.705263671875 388.232431640625 451.5263671875 532.04900390625 546.87123046875 543.2426953125 537.54234375 531.076875 527.63953125 525.8091796875 529.4616796875 526.52625 526.83603515625 522.59513671875 524.26283203125 519.45744140625 509.4186328125 507.43921875 500.38189453125 490.506181640625 482.21068359375 464.253955078125 444.4491796875 413.360654296875 351.22740234375 254.28041015625 177.36380859375 164.710576171875 222.456196289062 213.335844726562 266.252490234375 275.12267578125 413.56177734375 407.5219921875 403.36775390625 402.65953125 413.62734375 417.8998828125 434.341845703125 433.221708984375 453.15890625 385.467890625 279.8559375 243.58916015625 175.111552734375 117.946025390625 58.5674523925781 17.7295532226562 15.1085137939453 46.2882421875 16.4350378417969 12.9782757568359 131.669794921875 216.246064453125 102.214438476562 23.0988757324219 21.4235870361328 78.8797265625 239.9596875 166.621552734375 265.8975 225.395375976562 205.6777734375 14.4555972290039 211.421923828125 14.5487841796875 -9999 -9999 -9999 -9999 -9999 -9999 -9999 -9999 -9999 -9999 -9999 -9999 -9999 -9999 -9999 -9999 -9999 7.49095413208008 55.7859338378906 13.3226202392578 2.18000564575195 2.64293380737305 2.32540809631348 1.4509672164917 1.29024410247803 0.51733320236206 0.370013666152954 0.347124710083008 0.340350923538208 0.399946517944336 0.562833023071289 0.379402627944946 -9999 -9999 0.297583694458008 0.295484848022461 0.287973804473877 0.426047058105469 0.7254616355896 0.377398881912231 0.28788348197937 0.248514060974121 -9999 -9999 -9999 -9999 -9999 -9999 -9999 -9999 -9999 -9999 -9999 -9999 -9999 -9999 -9999 -9999 -9999 2.32270614624023 0.296843547821045 0.209870467185974 0.787397346496582 0.607544231414795 4.32128036499023 0.32849461555481 0.2590553855896 0.373036222457886 0.574977207183838 1.04331550598145 2.06881896972656 2.19489990234375 1.63197807312012 1.62514915466309 1.78360347747803 2.05241065979004 2.13177658081055 2.10640960693359 2.01037353515625 1.88793766021729 2.33304428100586 2.16278663635254 2.06488471984863 1.90528793334961 1.6250817489624 0.51254545211792 0.259684495925903 0.218105320930481 0.205506620407104 0.959630184173584 0.484257831573486 1.30096662044525 1.5468213558197 0.259246158599854 -9999 -9999 -9999 -9999 -9999 -9999 -9999 -9999 -9999 -9999 -9999 -9999 -9999 -9999 -9999 -9999 -9999 -9999 -9999 -9999 -9999 -9999 -9999 132.87932220459 138.759840393066 138.280634155273 134.667741088867 132.828177490234 151.207529296875 167.748521118164 160.932193603516 182.019126586914 165.470877685547 160.358070068359 126.427308959961 183.43659362793 187.865660400391 200.67063659668 205.454114379883 181.413125 83.1375341796875 105.791253051758 115.859044494629 130.869155273437 112.115205383301 -9999 -9999 -9999 -9999 -9999 -9999 -9999 -9999 -9999 -9999 -9999 -9999 -9999 -9999 -9999 -9999 -9999 -9999 -9999 -9999 -9999 -9999 -9999 -9999 -9999 -9999 -9999 -9999 -9999 -9999 136.716131591797 137.442485656738 -9999 -9999 -9999 -9999 -9999 -9999 -9999 -9999 -9999 -9999 -9999 -9999 -9999 -9999 -9999 -9999 -9999 -9999 112.326282806396 169.655086669922 147.306156921387 155.911087188721 257.826115722656 592.845456542969 409.618840332031 427.181575927734 343.228570861816 327.954086608887 292.499167785645 284.775790100098 290.157978515625 297.334964904785 296.388863525391 217.118921813965 211.534718170166 222.725467529297 206.79694519043 182.897499847412 165.862418060303 156.348396606445 160.606321105957 189.930373077393 162.086819458008 150.741533660889 194.677119140625 162.218258514404 175.216691436768 194.744281311035 203.06112121582 182.759988098145 219.762310638428 220.327569580078 195.392201385498 226.389234924316 230.001716766357 220.460337982178 224.263867950439 218.023330078125 218.918840789795 216.861768951416 215.650719909668 216.24706741333 217.015036468506 211.169012145996 214.011259002686 -9999 -9999 -9999 -9999 -9999 -9999 -9999 -9999 -9999 178.036958770752 189.909239501953 198.836505889893 211.3624168396 216.648106842041 227.087368011475 231.716059112549 227.588788146973 189.872637176514 206.520380859375 209.645959625244 211.210886535645 283.266499328613 285.99643157959 280.574272155762 283.964859008789 288.213991699219 288.151149902344 286.502398681641 284.880899047852 329.848494873047 328.947379760742 334.889101867676 348.167754821777 301.272758789062 330.564891357422 331.912424926758 289.883710327148 290.469981994629 291.486659545898 336.158566589355 337.251047058105 287.406746520996 286.838723144531 289.230759887695 290.495028076172 345.080168151855 355.874848022461 314.874956359863 362.718863525391 329.263280639648 332.581206665039 340.80505279541 351.458217773438 376.105072631836 365.66925567627 379.10208984375 351.104762878418 333.939163513184 330.207418212891 381.01129486084 536.897230224609 538.299025268555 389.71866027832 330.650755004883 332.644531860352 330.818826599121 303.748151550293 307.615067138672 331.208959350586 336.406670837402 337.626375732422 342.979590454102 340.971039733887 341.317092590332 339.438273925781 393.801715393066 341.927262268066 343.121467895508 342.138235473633 339.33074798584 346.13506439209 352.74976776123 350.981375427246 358.061168518066 364.779862976074 356.471845092773 363.89989654541 363.393536682129 407.356298217773 405.34273223877 348.916871337891 346.690247497559 341.07910949707 335.059771728516 382.451459655762 376.835306396484 325.542834777832 323.25717590332 318.866709594727 317.285392456055 364.703183898926 300.704131164551 339.08466796875 336.584621887207 330.862604370117 323.788189086914 330.956111755371 295.322909545898 360.871465759277 354.203920898438 320.214424438477 338.530572509766 343.203887329102 395.832260742187 393.144375 380.204774780273 387.163174438477 411.191128234863 426.138261108398 388.616239929199 406.74588684082 410.353731079102 414.54032409668 415.838430175781 435.301622314453 418.076513671875 403.553402709961 396.30898223877 394.26453918457 387.014015808105 391.762348022461 391.316986999512 393.715066223145 409.302127990723 404.332097167969 411.400409545898 413.600567321777 400.549443969727 334.999800109863 338.168688354492 349.848772888184 359.977692260742 361.896663208008 430.031370849609 444.917323608398 448.628796386719 475.787601013184 502.09248046875 388.560769958496 485.84340637207 481.650619812012 479.251029968262 410.979460144043 473.194228820801 467.128363952637 477.923587646484 494.143569030762 489.443214111328 463.988963012695 462.794485473633 455.228031005859 367.702097167969 370.437981262207 365.054191589355 352.691699523926 345.784117126465 332.48093170166 330.814747924805 413.139314575195 410.644434814453 410.275541381836 329.421231079102 410.960154418945 601.724586181641 414.704951477051 404.665944213867 396.589564819336 398.967794494629 398.568386535645 320.168018188477 326.152732543945 341.695140380859 500.075390625 571.94865234375 997.101328125 666.6912890625 639.92162109375 640.00669921875 529.39693359375 538.9559765625 661.04900390625 684.375809326172 624.869401245117 589.784463500977 623.214788818359 609.899216308594 1056.56759033203 696.71220703125 644.843364257812 710.50751953125 788.6091796875 817.1803125 789.66298828125 801.3643359375 808.86263671875 811.97138671875 755.26359375 276.108310546875 5.4783952331543 141.079306640625 2.86777450561523 1.45963829040527 11.3760012817383 518.75337890625 559.053046875 782.2330078125 791.60390625 786.6026953125 776.0544140625 744.1273828125 743.576953125 746.28685546875 576.5600390625 356.625556640625 39.7534936523437 579.74185546875 701.17060546875 725.5083984375 645.86203125 424.552412109375 386.714218139648 379.454449768066 376.000144958496 417.038799133301 615.15796875 450.551396484375 449.71400390625 454.501728515625 651.3451171875 607.996640625 638.26658203125 423.291298828125 436.45634765625 467.919140625 661.92609375 500.726484375 474.206396484375 445.42623046875 602.9944921875 631.76150390625 630.12943359375 576.05724609375 558.190546875 618.9690234375 595.976015625 292.014609375 26.9154858398438 261.575302734375 19.8805224609375 0.385124244689941 12.2663433837891 1.27329299926758 339.743291015625 21.7690173339844 417.78908203125 487.89732421875 456.902900390625 620.78759765625 491.4837890625 621.60134765625 452.472216796875 460.945751953125 442.477587890625 435.9099609375 433.61759765625 431.5109765625 449.83998046875 444.528662109375 416.989951171875 352.3865625 400.3509375 416.471279296875 383.008564453125 375.202060546875 394.27048828125 396.162421875 390.329853515625 368.07755859375 337.611123046875 312.724306640625
337.97009765625 -9999 -9999 0.231551599502563 5.34581085205078 55.3219555664062 -9999 4.53603973388672 243.462744140625 92.4985107421875 89.2772021484375 10.7917080688477 156.557783203125 126.87046875 195.998994140625 269.50494140625 -9999 -9999 -9999 -9999 -9999 -9999 -9999 -9999 188.019184570312 230.713798828125 304.258359375 296.01697265625 316.771083984375 323.430556640625 316.023193359375 318.28845703125 325.6285546875 328.071064453125 327.86291015625 302.722705078125 319.856572265625 324.07787109375 335.165726623535 316.25765625 321.477978515625 358.13009765625 335.848073730469 329.56845703125 344.422323303223 337.911157836914 339.41491973877 341.723056640625 349.184311523437 348.191109008789 345.950013427734 334.371291503906 331.733084106445 312.239226379395 310.134358520508 301.294602355957 297.074775695801 308.595006408691 318.011819458008 315.830937194824 339.701665649414 298.869513244629 289.008154907227 312.077801513672 329.046627502441 338.558881530762 355.609915466309 371.239365234375 380.085284729004 394.81032623291 391.68382598877 371.505053100586 378.633427734375 391.907458190918 356.215643920898 359.670885314941 414.97107421875 456.547646484375 584.7226171875 574.3655859375 588.40880859375 599.8941796875 603.1620703125 608.416875 608.0930859375 606.950859375 604.90142578125 576.961051025391 500.748362731934 473.947242736816 456.913883056641 506.273425598145 582.76154296875 613.68328125 612.2366015625 624.67880859375 585.8919140625 570.56126953125 610.84130859375 610.11544921875 491.46158203125 396.392578125 363.946000671387 355.589884643555 291.20166595459 276.782404174805 284.361245727539 316.944082946777 389.470797729492 378.41357208252 328.937923278809 340.753903198242 313.539024353027 338.841125793457 324.126628417969 317.872812194824 267.53759765625 262.590234375 234.821528320312 201.342568359375 216.500346679687 228.021723632812 231.198662109375 250.581796875 330.05015625 337.765751953125 342.358037109375 353.4319921875 377.6394140625 422.692734375 470.68939453125 502.1578125 519.0200390625 524.5119140625 523.635703125 525.21779296875 530.92658203125 531.99041015625 524.33853515625 510.25248046875 497.9656640625 500.89974609375 498.7857421875 497.9703515625 501.3125390625 497.765390625 501.3870703125 492.08953125 489.439013671875 480.419443359375 475.86087890625 459.17109375 441.9711328125 431.094228515625 419.45185546875 401.51859375 404.4062109375 391.64671875 401.3131640625 398.62166015625 452.388134765625 443.17705078125 447.53806640625 443.402138671875 449.079404296875 455.910791015625 467.225595703125 456.04640625 462.21955078125 449.332119140625 422.850146484375 389.755078125 326.057724609375 268.2690234375 204.848510742188 98.0024853515625 66.31916015625 38.23734375 14.0440100097656 13.2899514770508 8.59176910400391 47.6513342285156 187.177353515625 250.971767578125 244.551752929687 285.151875 -9999 254.662265625 268.805009765625 265.280419921875 253.652373046875 119.331166992187 2.56245986938477 -9999 -9999 -9999 -9999 -9999 -9999 -9999 -9999 -9999 -9999 -9999 7.27394622802734 12.2733233642578 8.54015441894531 11.8415817260742 22.0491412353516 20.6237915039063 24.6196691894531 15.9446392822266 10.24658203125 5.60707443237305 2.90060348510742 1.53717395782471 2.08764770507812 2.10714431762695 2.18401176452637 0.43791166305542 0.370085935592651 0.356746015548706 0.360256061553955 0.35523307800293 0.32624662399292 0.345274314880371 0.302417449951172 -9999 -9999 0.267509365081787 0.286891222000122 0.287709846496582 0.306046714782715 -9999 -9999 -9999 -9999 -9999 -9999 -9999 -9999 -9999 -9999 -9999 -9999 -9999 -9999 -9999 -9999 -9999 -9999 -9999 -9999 -9999 -9999 22.3991876220703 33.6656066894531 48.7394860839844 187.419916992187 127.76765625 0.2144939661026 0.340285205841064 0.452429523468018 0.627853202819824 1.46435382843018 2.04359916687012 2.17112754821777 2.27308296203613 1.82815383911133 1.91912109375 2.02587387084961 2.03895584106445 1.94359428405762 2.35522636413574 2.18121620178223 1.86286994934082 0.95984956741333 0.316696844100952 0.265490627288818 0.193250541687012 1.64704650878906 -9999 -9999 -9999 -9999 -9999 -9999 -9999 -9999 -9999 -9999 -9999 -9999 -9999 -9999 -9999 -9999 -9999 -9999 -9999 -9999 -9999 -9999 -9999 -9999 -9999 -9999 -9999 -9999 -9999 -9999 156.217427978516 145.554848022461 129.312086791992 115.930478897095 114.994846115112 164.927941894531 173.167666015625 174.617931518555 182.412672729492 159.894006347656 175.565546875 177.568217773437 175.249208984375 192.752790527344 186.204408569336 134.682697753906 170.844993286133 129.67248046875 132.186465759277 108.664525756836 59.9382377624512 91.3783203125 -9999 -9999 -9999 -9999 -9999 -9999 -9999 -9999 -9999 -9999 -9999 -9999 -9999 -9999 -9999 -9999 -9999 -9999 -9999 -9999 -9999 -9999 -9999 -9999 -9999 -9999 -9999 -9999 -9999 -9999 -9999 -9999 -9999 -9999 -9999 -9999 -9999 -9999 -9999 -9999 -9999 -9999 -9999 -9999 -9999 -9999 -9999 -9999 -9999 -9999 116.373151016235 186.095648803711 224.079949951172 163.362794952393 312.313639526367 426.7180078125 193.801669464111 309.607575073242 277.061717834473 279.546083679199 288.23450592041 288.494574279785 298.668238220215 205.778908081055 204.727123718262 204.586152648926 202.465377960205 196.637752990723 186.420643615723 156.742743988037 177.954071044922 -9999 -9999 -9999 -9999 -9999 175.845743865967 184.79381149292 189.762044677734 159.185628204346 180.381909484863 177.258158569336 182.117219238281 181.491293792725 188.139910583496 220.914324645996 222.268837280273 215.943719787598 216.545852966309 214.314923858643 217.873295288086 214.696219482422 213.738576965332 222.413992767334 210.71002532959 212.894064788818 169.200359802246 -9999 276.803039245605 -9999 199.205006561279 173.571686553955 184.737012176514 -9999 -9999 -9999 178.884190063477 186.688824005127 193.981554107666 230.612792816162 221.078634796143 231.312391204834 231.447183837891 229.90352645874 232.228174438477 203.097421417236 206.579204406738 210.817657012939 213.649359741211 211.086441650391 264.656596069336 275.624272155762 280.901442260742 299.028430480957 282.547202453613 291.269613647461 294.062508544922 285.898059997559 279.748023376465 329.122007446289 324.045236206055 323.53083984375 323.248625793457 321.52802947998 319.881846313477 323.475762634277 284.153898010254 282.583276062012 326.587186889648 329.597369384766 326.932182312012 327.754080505371 292.612917480469 299.333636169434 312.75930267334 332.223491821289 403.59609375 403.7061328125 408.71912109375 479.4568359375 429.488907165527 336.695048217773 336.183461608887 332.159864501953 328.200227050781 383.44079498291 380.576900939941 533.296153564453 379.073803710938 325.777585144043 325.038831481934 324.919401855469 326.996081542969 327.715015869141 331.900944213867 327.397815856934 329.173187255859 321.378145751953 322.283762512207 325.568515319824 337.309810180664 333.108352661133 333.113458557129 385.18450378418 388.253056640625 333.513500976563 338.256394958496 340.103067626953 340.692934570313 343.261321105957 345.965210266113 348.782184448242 353.83270111084 332.849523010254 351.916539916992 350.92445526123 345.067176818848 338.686528930664 335.582687988281 325.601507263184 375.530946350098 368.699136657715 319.337932434082 365.735994873047 366.448947143555 359.410273132324 305.037224121094 305.246898193359 297.283392333984 287.93957244873 284.91014465332 280.428376464844 321.545159912109 328.901940307617 342.150652770996 377.162687988281 319.915865478516 386.592311096191 334.472021484375 339.13494140625 339.64951171875 337.5230859375 387.816608276367 333.534710083008 375.784458618164 377.661162414551 344.573868713379 345.75260559082 380.132234802246 402.147982177734 422.1692578125 408.920031738281 393.972861328125 397.69047454834 399.418472900391 330.038621520996 389.166589050293 379.433935546875 369.217218933105 366.977059936523 366.03703125 570.326467895508 377.95673034668 388.992021789551 430.029407043457 422.307509765625 440.413681640625 360.346011657715 428.001973571777 352.715265197754 417.226357727051 341.058836975098 412.988192138672 404.353547973633 409.821962585449 416.014840393066 434.929133605957 443.9724609375 447.053974914551 430.081734924316 444.08358215332 462.098663635254 472.994645690918 476.523544921875 478.737691040039 369.408070678711 355.870557861328 437.000405273437 428.060464782715 432.638278198242 410.253214416504 408.521379089355 405.160611877441 402.020425415039 401.369952392578 388.266803283691 390.48049621582 386.986190185547 395.746759643555 396.736397094727 396.571890563965 389.423485107422 570.18289855957 560.311116943359 381.408829650879 380.228914489746 385.060542297363 306.271914367676 327.090314025879 353.106123046875 505.611532287598 540.932640380859 615.335213012695 760.99236328125 782.50927734375 775.75541015625 636.386015625 639.42638671875 658.679677734375 615.370017700195 641.697105102539 616.116143188477 887.778149414062 651.248574829102 725.004239501953 759.9690234375 717.80138671875 693.68794921875 664.815212402344 781.30212890625 801.0455859375 787.67572265625 781.23873046875 760.86873046875 753.6566015625 600.0408984375 624.99076171875 376.815087890625 4.5363542175293 11.6227835083008 15.3374349975586 98.8065454101562 583.93775390625 554.9279296875 44.8047802734375 310.5303515625 586.39658203125 4.84429962158203 0.604371757507324 0.586753177642822 580.047421875 531.27451171875 0.531415786743164 0.978544006347656 178.889428710937 722.78220703125 425.606734313965 376.645814208984 363.63886138916 361.720766601563 385.974890441895 408.75984375 403.806416015625 424.677509765625 564.17525390625 562.22255859375 552.50021484375 362.2662890625 345.476982421875 419.9216015625 432.113642578125 477.192802734375 648.89578125 657.53068359375 474.151318359375 466.74 487.426435546875 439.044990234375 440.67181640625 618.1674609375 607.4846484375 450.271083984375 264.40494140625 21.6756555175781 296.58234375 258.541142578125 198.432788085937 11.0434771728516 0.763372478485107 49.1347705078125 45.2857507324219 810.048515625 847.6955859375 597.66298828125 588.95138671875 600.775078125 453.252978515625 404.67486328125 386.71397644043 406.783984680176 394.957490844727 409.725887145996 416.66080078125 442.70478515625 430.872978515625 406.41298828125 397.915546875 414.76763671875 338.275693359375 331.141640625 388.591845703125 385.484677734375 390.0083203125 381.355576171875 330.761572265625 336.29689453125 320.445234375
-9999 -9999 -9999 -9999 -9999 -9999 -9999 -9999 95.8038354492188 296.624736328125 326.518212890625 270.774873046875 83.9033349609375 82.75857421875 303.81474609375 -9999 -9999 -9999 -9999 -9999 -9999 -9999 -9999 -9999 -9999 -9999 298.8212109375 313.265390625 306.885263671875 306.982939453125 328.845908203125 309.441123046875 290.052890625 288.87873046875 296.952978515625 294.2784375 310.099161071777 314.424731140137 317.603166503906 312.611923828125 344.3508984375 419.56388671875 333.007201538086 330.93417755127 328.296876525879 327.10451385498 327.493951721191 330.026143798828 337.904843444824 319.389444580078 311.016923217773 303.690113525391 302.761172790527 310.215509033203 306.022118225098 298.513429870605 292.830718688965 286.076645507812 286.027610778809 281.878330078125 281.320186157227 271.975067138672 283.291817321777 280.556144714355 264.69841003418 278.672159729004 321.966592712402 352.833728027344 364.994280395508 390.01011932373 411.472768249512 475.635908203125 488.061474609375 485.695986328125 446.2496484375 465.18205078125 486.457177734375 421.686767578125 462.655145874023 560.871328125 555.083203125 529.35041015625 571.2671484375 579.83044921875 546.06392578125 574.77890625 573.40259765625 574.16947265625 553.0580859375 548.86318359375 557.1587109375 553.27142578125 512.24853515625 536.92517578125 527.0063671875 420.35771484375 531.11466796875 582.045 506.87671875 525.9493359375 611.3516015625 611.10515625 617.4605859375 601.27693359375 594.67892578125 501.4508203125 404.730024719238 293.292182922363 302.454758605957 297.521526489258 292.100756835937 403.38104095459 338.413741149902 299.356567382812 311.856646728516 321.061278076172 305.360859375 286.49194519043 252.808857421875 258.123076171875 248.782998046875 250.20509765625 231.937573242187 210.264287109375 289.9578515625 301.147265625 310.9255078125 319.32884765625 377.768876953125 405.147919921875 434.771337890625 455.008681640625 470.72748046875 488.98681640625 495.6659765625 498.4449609375 496.32984375 496.1626171875 495.54310546875 487.082314453125 486.61921875 484.339658203125 479.652626953125 476.923212890625 483.91921875 483.6809765625 484.05767578125 484.629228515625 481.80626953125 479.87326171875 478.680498046875 472.162236328125 465.68654296875 467.08962890625 470.10181640625 463.21341796875 460.641357421875 462.370048828125 473.321689453125 475.461240234375 474.68080078125 474.050537109375 466.96623046875 480.688505859375 491.4955078125 490.83779296875 489.1512890625 483.821982421875 479.085234375 465.452021484375 463.294365234375 455.520673828125 442.833603515625 412.1267578125 380.76134765625 366.245830078125 361.97689453125 329.237021484375 274.699833984375 229.213857421875 82.7032763671875 46.7489172363281 81.3152124023437 217.82220703125 313.41158203125 298.837763671875 -9999 331.1722265625 316.094677734375 306.063837890625 170.81337890625 2.88875450134277 4.63768798828125 1.86756660461426 92.6256225585937 220.069482421875 -9999 -9999 -9999 -9999 -9999 -9999 -9999 11.6579287719727 2.97688568115234 0.81903076171875 0.748105316162109 2.96712249755859 17.9152423095703 15.4645056152344 20.1760546875 31.5068518066406 19.5608605957031 4.76669723510742 0.713675937652588 1.12794342041016 5.05788528442383 1.57881088256836 2.87453910827637 1.81470279693603 0.542815475463867 0.369767904281616 0.361827363967895 0.3460129737854 0.412929496765137 0.428832292556763 0.326619901657104 0.289148740768433 0.275755805969238 -9999 -9999 -9999 0.262194185256958 -9999 -9999 -9999 -9999 -9999 -9999 -9999 -9999 -9999 -9999 -9999 -9999 -9999 -9999 -9999 -9999 -9999 -9999 -9999 -9999 -9999 -9999 217.1201953125 232.096412963867 198.463154296875 183.461689453125 156.913784179687 0.473498439788818 0.241125068664551 0.37703272819519 0.670074405670166 1.8352880859375 1.95586692810059 2.08454566955566 2.22702598571777 2.31598503112793 1.84969573974609 1.89684173583984 1.93119003295898 1.88991439819336 2.35904296875 2.10160125732422 1.89262298583984 1.62680099487305 0.329495258331299 0.182011528015137 -9999 -9999 -9999 -9999 -9999 -9999 -9999 -9999 -9999 -9999 -9999 -9999 -9999 -9999 -9999 -9999 -9999 -9999 -9999 -9999 -9999 -9999 -9999 -9999 -9999 -9999 -9999 -9999 -9999 -9999 -9999 -9999 -9999 153.663378295898 146.731636657715 108.509368743896 107.502880325317 105.547994384766 167.105172119141 171.753880615234 144.710929260254 166.677482299805 185.76172668457 121.237735595703 187.876262817383 119.300935974121 0.71848464012146 0.171762809157372 45.5521517944336 29.6864710998535 88.2942028808594 66.1375453186035 116.229553833008 130.324520263672 -9999 -9999 -9999 -9999 -9999 -9999 -9999 -9999 -9999 -9999 -9999 -9999 -9999 -9999 -9999 -9999 -9999 -9999 -9999 -9999 -9999 -9999 -9999 -9999 -9999 -9999 -9999 -9999 -9999 -9999 -9999 -9999 -9999 -9999 -9999 -9999 -9999 -9999 -9999 -9999 -9999 -9999 -9999 -9999 -9999 -9999 -9999 -9999 114.253267593384 115.949807281494 122.537863311768 146.957037506104 161.122998504639 169.44932510376 175.534646759033 188.477126312256 287.613520202637 185.918573913574 190.466084289551 205.843290710449 206.226958007812 293.534969787598 215.367312469482 207.696172027588 196.783074645996 190.098973388672 187.933423919678 159.478144683838 154.820298614502 138.864298095703 -9999 -9999 -9999 -9999 -9999 186.095240936279 189.855476531982 148.918623046875 153.307321929932 156.108283538818 154.62730178833 167.650841217041 186.162523956299 187.919480895996 190.562295684814 159.783924407959 191.325959472656 208.193271789551 204.048885498047 204.278605499268 213.69756362915 216.801087341309 219.005218048096 221.48375289917 217.824532470703 197.480543060303 194.266260681152 -9999 277.827149047852 -9999 202.263906555176 185.642749786377 191.529273834229 186.769763031006 178.91400970459 172.789865112305 147.483216705322 198.274917755127 177.092715454102 183.391608581543 195.826610412598 190.805550842285 194.964831848145 225.068454437256 195.572131347656 194.662586975098 200.796988677979 202.52782699585 223.669937438965 225.873373260498 228.620874023437 268.808565673828 312.949368896484 326.952424621582 275.914945678711 293.949121398926 289.121179504395 291.380432739258 280.241905517578 287.744883728027 300.99725189209 275.567865600586 272.813612365723 270.58865020752 318.051820678711 320.728639526367 280.461942443848 276.628592834473 276.053952941895 275.668261413574 279.021324462891 281.379190979004 323.5869140625 291.117917175293 335.33582244873 351.38572265625 389.836201171875 349.52859375 352.195793151855 348.364588623047 337.856986999512 331.108231201172 327.323946533203 320.44056427002 377.020508422852 378.48396697998 376.81192199707 373.775424499512 369.090931091309 316.683984375 323.870850219727 319.829850769043 320.233428039551 323.464040222168 322.155238952637 323.585252380371 377.261271057129 373.907543334961 324.515733947754 326.82607635498 327.850035095215 330.071130065918 380.322452087402 327.606946105957 383.201663818359 331.278175964355 332.622537231445 333.00158203125 333.907500915527 336.441596374512 335.630695495605 339.557824401855 350.72592956543 343.526193237305 328.059769592285 340.830219726563 340.287272644043 329.324551391602 325.486246948242 377.748023071289 373.822132873535 319.137050170898 314.95831237793 359.661670532227 360.268970031738 353.468611450195 350.512509155273 345.556587524414 294.553641357422 284.522428894043 276.005582885742 274.282901916504 317.171944885254 285.283026123047 339.868468322754 348.859135437012 364.2155859375 367.10334777832 532.124939575195 404.621743469238 342.094336853027 347.798891601563 335.707797546387 379.12501373291 389.621346130371 373.240151367187 334.918981933594 341.072734680176 373.17443939209 368.399036865234 378.696239318848 395.085953979492 391.300793151855 400.33807800293 397.242213134766 559.095974121094 370.10775970459 369.433902282715 367.896846313477 368.529222106934 507.625581665039 535.639971313477 372.62143157959 381.930688476563 404.150248718262 334.441867675781 349.755930175781 355.027208862305 406.177289428711 337.652962646484 398.094807128906 335.143883056641 331.864054870605 392.81059753418 391.169338989258 562.935245361328 573.768627319336 395.285537109375 401.936495361328 409.155386352539 410.838489074707 417.429022521973 428.964691772461 448.22932800293 437.774658508301 645.627436523437 432.227389526367 440.721304321289 331.716920471191 309.29520904541 381.555782775879 383.879025878906 382.683551330566 383.126676635742 381.275200195312 375.168125610352 365.514628601074 364.713486328125 371.817026367188 369.169181213379 374.112383422852 381.908059387207 382.346078796387 373.879476013184 368.44964263916 361.399216003418 364.259091796875 366.879987487793 298.096831054687 354.318969726562 466.993133239746 527.743718261719 967.51587890625 739.01033203125 755.00830078125 684.49998046875 783.352734375 777.76775390625 713.5937109375 781.62919921875 769.6262109375 773.09923828125 786.3594140625 797.290546875 791.4139453125 785.267578125 800.57677734375 795.87556640625 730.040707397461 797.27478515625 791.97404296875 781.685625 754.62421875 764.8187109375 780.323203125 805.82431640625 816.46681640625 787.9761328125 774.748828125 778.39482421875 705.06345703125 776.9047265625 739.8985546875 605.0115234375 727.6959375 720.49751953125 774.958359375 214.507778320312 16.9641046142578 0.551028957366943 3.85885528564453 481.332216796875 747.38771484375 664.47076171875 651.6425390625 605.16662109375 589.625625 450.964154663086 374.657868347168 364.546049194336 343.874058837891 352.3303125 347.641376953125 384.0558984375 487.182392578125 459.05009765625 374.514111328125 389.025263671875 387.130517578125 399.174111328125 426.466611328125 458.73638671875 472.896181640625 495.1740234375 492.9659765625 476.7999609375 475.417265625 423.498486328125 416.60203125 440.1366796875 586.13431640625 525.7625390625 2.80012367248535 1.17893325805664 341.44166015625 397.364033203125 16.8783068847656 316.640244140625 445.0815234375 708.509296875 827.454140625 584.87162109375 818.74400390625 856.49279296875 578.86828125 444.236953125 372.532274780273 364.008238220215 368.21129699707 376.815638122559 397.25671875 421.9728515625 416.55328125 392.002646484375 402.32361328125 409.554580078125 411.99275390625 405.33837890625 396.843046875 389.011728515625 320.87033203125 377.094580078125 449.13685546875 372.339580078125 350.03830078125 370.8732421875 318.03890625
-9999 -9999 -9999 -9999 -9999 -9999 -9999 -9999 -9999 -9999 -9999 297.13658203125 75.7524096679687 321.275419921875 262.8223828125 -9999 -9999 -9999 -9999 -9999 -9999 -9999 -9999 -9999 -9999 -9999 -9999 -9999 -9999 295.187437133789 288.27511138916 -9999 -9999 307.947252502441 315.732626037598 -9999 -9999 312.414065551758 330.322376403809 337.686884765625 376.210048828125 325.10296875 327.817164001465 324.726435241699 332.737434997559 338.712058410645 334.590693969727 325.649091796875 325.935565795898 317.317055053711 313.470472412109 304.722713012695 313.735284118652 313.552740783691 312.914926757813 314.126564941406 306.690839538574 304.281853637695 291.324721069336 283.575511779785 296.310462341309 284.030963745117 307.740025634766 306.643315429688 306.353397216797 306.867098693848 324.492953796387 327.830578308105 330.975508117676 348.207333068848 389.11202545166 397.60010925293 495.35068359375 462.654990234375 458.22345703125 469.739970703125 462.74203125 442.317685546875 415.674521484375 372.313681640625 401.54654296875 418.37208984375 466.469296875 581.8569140625 572.26359375 581.62048828125 584.5557421875 576.60099609375 563.226796875 533.4416015625 578.27326171875 591.27181640625 562.0611328125 566.088984375 586.72189453125 555.76640625 573.7920703125 582.14208984375 562.30330078125 524.04685546875 607.89814453125 608.18677734375 597.30955078125 587.33712890625 576.36046875 529.304296875 473.563182678223 413.805981445313 395.389709472656 298.055681762695 284.365082702637 332.44908782959 452.67118560791 336.80792175293 303.719842529297 309.133874816895 310.041606445312 313.398989868164 322.026231994629 311.683681640625 270.15591796875 240.699624023437 233.090610351563 236.090639648438 219.221235351562 301.99388671875 304.477705078125 318.400576171875 342.68912109375 360.397734375 397.90541015625 411.21650390625 423.15041015625 433.743662109375 449.871884765625 455.15630859375 455.901708984375 457.13625 457.163759765625 458.934287109375 457.279306640625 455.1085546875 450.9568359375 449.82193359375 453.60392578125 451.937490234375 450.002431640625 452.16861328125 460.316806640625 463.2580078125 464.427890625 468.638642578125 471.80765625 479.047119140625 484.72201171875 478.035439453125 476.59119140625 478.88759765625 475.28373046875 475.431533203125 469.787109375 472.628466796875 470.6701171875 481.865478515625 484.60939453125 482.19984375 484.118115234375 484.22267578125 475.674990234375 482.020634765625 480.723486328125 475.127958984375 454.14193359375 441.91669921875 431.951630859375 425.611494140625 386.04240234375 358.168564453125 355.289384765625 357.57146484375 357.106083984375 348.68666015625 347.082802734375 381.04154296875 319.237646484375 -9999 -9999 349.205537109375 345.267275390625 338.563359375 305.474853515625 210.495834960937 255.149326171875 328.366728515625 253.278017578125 227.077119140625 312.4013671875 -9999 -9999 -9999 -9999 -9999 -9999 -9999 2.96751846313477 10.3158068847656 6.60453323364258 1.75277172088623 8.89901458740234 6.05674072265625 10.2921734619141 14.8258126831055 15.2360888671875 52.0641687011719 6.85193756103516 0.867603778839111 0.482017192840576 0.420264415740967 0.37047534942627 0.419879693984985 0.688820285797119 0.544839134216309 0.447783050537109 0.34924015045166 0.396214513778686 0.409131660461426 0.419514541625977 0.453664884567261 0.47537561416626 0.24899808883667 -9999 -9999 -9999 -9999 -9999 -9999 -9999 -9999 -9999 -9999 -9999 -9999 -9999 -9999 -9999 -9999 -9999 -9999 -9999 -9999 -9999 -9999 -9999 -9999 -9999 248.1348046875 186.994244384766 5.53582717895508 0.305399122238159 69.3571948242188 89.9333862304687 0.210667405128479 0.414202880859375 1.05460155487061 1.85064365386963 1.94966423034668 2.08710433959961 2.22327049255371 2.32028297424316 2.36681488037109 1.8790697479248 1.90745693206787 1.85135066986084 2.3083275604248 2.00114501953125 1.60005523681641 0.297543897628784 0.177381949424744 0.189012980461121 0.381032495498657 -9999 -9999 -9999 -9999 -9999 -9999 -9999 -9999 -9999 -9999 -9999 -9999 -9999 -9999 -9999 -9999 -9999 -9999 -9999 -9999 -9999 -9999 -9999 -9999 -9999 -9999 -9999 -9999 -9999 -9999 -9999 -9999 -9999 -9999 114.188069229126 113.173680267334 113.257179794312 148.757220458984 155.492020874023 119.686605606079 150.991197509766 154.809395141602 142.77658996582 164.135592651367 96.436018371582 12.2844776153564 0.17093825340271 15.0656396102905 122.560506591797 97.4925672912598 95.5512316131592 -9999 -9999 -9999 -9999 -9999 -9999 -9999 -9999 -9999 -9999 -9999 -9999 -9999 -9999 -9999 -9999 -9999 -9999 -9999 -9999 -9999 -9999 -9999 -9999 -9999 -9999 -9999 -9999 -9999 -9999 -9999 -9999 -9999 -9999 -9999 -9999 -9999 -9999 -9999 -9999 -9999 -9999 -9999 -9999 -9999 -9999 -9999 -9999 -9999 122.404241409302 124.050885314941 124.764517364502 128.483769836426 160.299423522949 167.85501663208 178.57472442627 186.462563323975 189.713236541748 180.474540710449 183.866728820801 176.282554779053 192.268148345947 206.562134399414 203.074898071289 216.528964233398 209.733832397461 197.880071868896 186.934843597412 179.398918762207 153.733769989014 146.359662780762 130.744473266602 -9999 -9999 -9999 165.202564086914 172.857163238525 182.604681243896 182.30940032959 176.002108154297 179.680891113281 152.837111206055 150.620140228271 179.241134490967 181.260410614014 182.239050750732 159.833623809814 196.466796112061 192.84065826416 201.842639923096 192.512823486328 288.021115722656 210.029490966797 211.48423324585 214.725404663086 213.474822692871 211.761734161377 214.842749633789 186.629124298096 180.142143859863 182.51913482666 161.501575012207 -9999 167.790346984863 189.96540435791 170.407677612305 178.668669891357 180.437998809814 171.730980834961 174.538302154541 180.001807250977 181.509829101563 180.76059173584 183.142990722656 213.646414031982 218.0616847229 192.157027130127 188.261953582764 216.856209869385 225.657158203125 230.012804718018 323.0919140625 224.653396453857 198.09642288208 207.12940246582 201.442355804443 231.723279876709 233.284037475586 316.320227050781 319.011698913574 284.055224304199 272.662459716797 268.891559143066 284.220425720215 270.226101379395 262.256704101562 310.526606140137 309.18203338623 317.442678222656 272.27758392334 266.957481994629 272.430277404785 268.217913208008 271.894188537598 314.538994445801 290.211394042969 309.151488647461 361.145220336914 350.023642272949 325.106748962402 366.852856750488 373.278188781738 312.000367126465 316.618937072754 317.817251586914 314.58165435791 313.012271118164 313.051335754395 309.626578674316 360.949141845703 514.4248828125 363.150477905273 365.577651672363 370.825425109863 362.720343933105 364.118241577148 369.500399780273 317.229167175293 364.322537841797 312.796705627441 319.345757446289 319.450624694824 320.603016357422 368.816813964844 317.105930786133 368.205677490234 315.821057739258 316.907133178711 318.022756347656 319.81498626709 323.603863220215 323.835411071777 327.864385986328 341.435978393555 347.232257995605 331.001702270508 330.080556335449 330.068652648926 327.563863220215 323.119014587402 318.200979309082 317.980851745605 368.269576721191 364.095612487793 362.661550598145 359.191807250977 357.786416931152 351.910739135742 347.440391235352 296.388229064941 334.45848449707 280.584997558594 273.452453613281 314.417147827148 312.128497924805 330.718460998535 336.194035949707 341.392563171387 359.115249023438 380.967094116211 389.249522094727 399.204206542969 396.43545135498 390.323421936035 380.100723266602 371.584783630371 381.358163452148 520.849791870117 513.179104614258 374.056611328125 374.439704589844 540.907261962891 554.057935180664 538.371172485352 539.635440673828 522.914326171875 547.872368774414 373.666539001465 515.246720581055 356.90131439209 505.934925842285 365.338731994629 368.926152648926 378.151328430176 390.237105102539 408.992904052734 344.206818237305 335.353194580078 325.580630493164 377.05993560791 381.726029663086 378.617566223145 377.851198425293 387.400885620117 377.416381530762 380.394508666992 378.538500366211 536.494921875 381.463725585937 386.676845397949 392.139036254883 396.561890258789 401.449562072754 410.494702148438 413.747006835937 422.362012939453 629.387484741211 634.410538330078 636.839313354492 395.497114562988 373.068212585449 363.157245483398 347.718720703125 350.885712890625 357.728876953125 365.051049499512 362.672094726562 355.784482727051 362.683756713867 352.224585571289 345.017900390625 345.409422912598 347.76946472168 362.570127868652 363.405712280273 360.450969543457 358.977661743164 354.084128723145 349.114913635254 353.101017150879 351.566468811035 360.117515258789 385.762346191406 415.868521728516 483.019392700195 527.759549560547 560.452994384766 618.27137512207 607.593405761719 510.510684814453 550.938565063477 632.8205859375 464.840378723145 510.78662109375 592.868203125 626.25955078125 777.078984375 794.41236328125 790.11005859375 776.66513671875 1150.572890625 754.86134765625 777.03755859375 799.487578125 751.7668359375 750.7454296875 752.7609375 685.1267578125 702.94318359375 1092.9741796875 800.21384765625 797.08435546875 797.28263671875 794.711015625 793.21681640625 762.16318359375 265.549658203125 632.66666015625 762.1257421875 744.93451171875 564.37623046875 356.116875 140.462080078125 0.523999500274658 9.73079406738281 442.45587890625 588.7983984375 578.94029296875 747.807421875 734.93958984375 557.186066894531 394.573974609375 397.639566650391 401.523975219727 431.872998046875 403.54436920166 528.077021484375 450.60378112793 473.854128112793 405.646850280762 453.51978515625 451.072880859375 636.2532421875 461.16755859375 607.69458984375 85.0842846679687 445.90447265625 447.60123046875 68.4083203125 383.569775390625 436.675107421875 566.6075390625 433.253349609375 428.140576171875 496.124765625 290.268603515625 416.28931640625 412.444541015625 412.05052734375 414.65267578125 426.379306640625 437.890400390625 562.79818359375 841.8406640625 571.80767578125 576.18943359375 452.739169921875 413.4369140625 386.655545654297 348.539619140625 348.487794799805 356.236201171875 363.642758789062 409.575 415.404111328125 409.046572265625 430.14041015625 349.65322265625 411.210263671875 500.88796875 477.296015625 467.815166015625 384.104736328125 381.9481640625 382.93271484375 379.961689453125 -9999 -9999 -9999
-9999 -9999 -9999 -9999 -9999 -9999 -9999 -9999 -9999 -9999 -9999 -9999 -9999 -9999 -9999 -9999 246.60603515625 243.948706054687 217.91150390625 144.9366796875 -9999 -9999 -9999 -9999 -9999 -9999 -9999 -9999 -9999 -9999 -9999 -9999 -9999 -9999 -9999 -9999 -9999 -9999 324.103274230957 333.845051879883 333.298781433105 319.698487243652 317.92779876709 314.366904602051 314.280104370117 313.965291137695 317.069857177734 317.003057556152 325.246753234863 317.755980834961 323.225996704102 328.106326904297 324.969584655762 316.531049194336 318.011124572754 305.208226318359 302.945438232422 304.894682006836 315.266206970215 318.656219787598 330.853450012207 332.607733154297 328.884084777832 389.998857421875 303.996123046875 243.982353515625 357.7210546875 388.3461328125 341.986025390625 357.058902282715 358.203287658691 365.209302062988 375.136432800293 384.912833862305 375.815849304199 376.662612304688 411.416240844727 415.43982421875 384.0317578125 378.599150390625 375.793447265625 365.451937866211 370.436440429687 372.113198547363 358.247881164551 385.769838867188 477.902348327637 453.998930053711 442.617555541992 457.26733795166 450.962341918945 458.997149047852 454.883398132324 463.620281066895 576.10013671875 586.06693359375 611.4052734375 605.40134765625 602.8320703125 597.2907421875 587.92875 597.38935546875 592.9210546875 604.761796875 586.678828125 579.98513671875 535.799296875 423.141613769531 459.676656188965 421.872934570313 393.51300567627 304.466088867188 307.81304901123 423.682476196289 339.266909179688 309.551712341309 311.586578063965 308.76050994873 305.079430847168 322.224213867187 282.130875549316 244.760244140625 237.4115625 217.07091796875 213.578188476563 213.401879882812 234.4714453125 287.8901953125 317.17408996582 328.189599609375 348.0130078125 360.666533203125 372.319833984375 406.969072265625 422.86177734375 437.376884765625 435.246943359375 437.179541015625 436.294072265625 436.134521484375 435.422373046875 428.49533203125 426.042685546875 428.2976953125 426.680830078125 428.129794921875 425.16515625 428.02423828125 432.140947265625 439.250419921875 444.301142578125 451.8903515625 461.591103515625 479.057255859375 489.180966796875 484.5521484375 485.537197265625 478.1637890625 475.80333984375 473.58884765625 467.961474609375 464.770869140625 473.2519921875 473.882490234375 480.520458984375 478.2186328125 480.123603515625 482.858935546875 483.49248046875 480.610576171875 477.17876953125 478.845966796875 488.6265234375 486.4241015625 466.752333984375 453.99498046875 443.7575390625 431.45953125 419.03080078125 421.84435546875 408.37517578125 -9999 400.36294921875 -9999 -9999 332.447607421875 356.248125 356.540126953125 356.170693359375 337.6669921875 331.56123046875 348.869794921875 354.23794921875 263.025087890625 195.554267578125 326.321953125 311.688720703125 256.577314453125 259.4785546875 23.7595477294922 -9999 -9999 -9999 -9999 16.5907708740234 5.97797836303711 3.71176872253418 -9999 -9999 -9999 -9999 -9999 -9999 -9999 16.2171789550781 28.633623046875 30.0489294433594 0.742064380645752 0.347502250671387 0.353300228118896 0.343313112258911 0.34151255607605 75.7688232421875 7.12343856811523 0.341801719665527 0.356616411209106 0.449598398208618 0.426693649291992 0.561159038543701 0.357774238586426 0.233761067390442 -9999 -9999 -9999 -9999 -9999 -9999 -9999 -9999 -9999 -9999 -9999 -9999 -9999 -9999 -9999 -9999 -9999 -9999 -9999 -9999 -9999 -9999 -9999 -9999 -9999 76.8726049804688 4.88384857177734 0.168907098770142 0.140363774299622 0.191181092262268 0.320781154632568 1.16281837463379 1.72398319244385 1.84959617614746 1.97286712646484 2.11031890869141 2.22920951843262 2.33255264282227 1.84923362731934 1.86689254760742 2.35413482666016 2.28194641113281 2.16841575622559 1.97144508361816 1.58243133544922 0.260530614852905 0.277055768966675 0.168557481765747 -9999 -9999 -9999 -9999 -9999 -9999 -9999 -9999 -9999 -9999 -9999 -9999 -9999 -9999 -9999 -9999 -9999 -9999 -9999 -9999 -9999 -9999 -9999 -9999 -9999 -9999 -9999 -9999 -9999 -9999 -9999 -9999 -9999 -9999 -9999 114.760005111694 112.472578811646 115.397116699219 115.142124023438 108.499678115845 109.079325714111 133.368121948242 145.185657348633 114.534341125488 112.652312393188 114.196581573486 169.051751098633 147.855545959473 -9999 -9999 -9999 -9999 -9999 -9999 -9999 -9999 -9999 -9999 -9999 -9999 -9999 -9999 -9999 -9999 -9999 -9999 -9999 -9999 -9999 -9999 -9999 -9999 -9999 -9999 -9999 -9999 -9999 -9999 -9999 -9999 -9999 -9999 -9999 -9999 -9999 -9999 -9999 -9999 -9999 -9999 -9999 -9999 -9999 -9999 -9999 -9999 -9999 122.256049575806 111.897546386719 121.727196578979 116.821110305786 125.862458724976 122.774207382202 123.978647460937 143.201711425781 177.624272460938 161.843896636963 166.935184936523 167.578845062256 170.107547607422 169.40498840332 168.336572113037 176.86246673584 194.674415130615 196.595229034424 188.373633728027 193.515784606934 190.438303985596 180.685634765625 170.952845306396 160.149071502686 139.032369689941 142.680607910156 -9999 -9999 150.078945465088 143.276169891357 167.990957336426 168.362690734863 143.640048065186 176.39492980957 143.186469268799 177.352980194092 177.123471679687 173.176931304932 169.907148742676 172.43840423584 178.982727813721 183.565662231445 192.148854675293 192.459513702393 211.205206604004 212.598602600098 203.452311401367 194.817319793701 213.439111633301 204.858804473877 178.620979614258 198.855101623535 195.297138061523 196.625048675537 199.666954193115 205.685098571777 208.282035827637 183.290668945312 165.569010314941 168.850877838135 167.047272949219 174.267009887695 168.937406158447 167.767007904053 176.443496246338 173.194303436279 175.68323135376 202.944939422607 179.476836547852 206.529973297119 216.888340759277 217.861240539551 224.772131195068 225.236435394287 228.671419372559 230.328086242676 203.055803833008 229.6039402771 228.058062286377 233.258779907227 200.725657196045 223.787614746094 221.643123321533 195.280793151855 191.738842163086 198.450859680176 195.526102752686 195.762907562256 199.978776397705 201.04902053833 211.186792144775 224.184635925293 222.463359832764 304.047465820312 262.224920654297 296.992144775391 300.099852905273 296.211939697266 302.772864990234 277.357920227051 300.98991027832 322.651870422363 361.940289916992 369.216221923828 317.068104858398 306.06121307373 309.218409118652 310.99921875 306.243424072266 311.245480041504 306.975712280273 307.491830749512 301.43913848877 299.948790893555 354.539973449707 353.620126647949 374.286678771973 361.676112670898 356.765267944336 357.565896606445 359.843035583496 306.032692565918 305.401555480957 307.89102722168 302.183269958496 304.196896362305 307.837551269531 303.637272033691 355.319151306152 307.106139221191 304.857853088379 287.599985046387 308.346418762207 309.81818572998 309.967525634766 362.099871826172 312.978674926758 314.718637390137 324.283370361328 321.264093933105 367.588226623535 336.71368927002 332.304370422363 370.034373779297 317.998979187012 371.821769714355 369.483118286133 368.320182495117 363.101654663086 310.316327819824 307.372582397461 354.48716217041 350.189236450195 294.603310546875 341.647283935547 331.960764770508 285.089364624023 281.120603027344 332.28331237793 274.162414855957 328.903179016113 340.701454467773 333.442411193848 501.80921081543 362.046123962402 369.209907531738 379.874402160645 384.682736206055 409.308895568848 397.894498901367 406.678875732422 403.222576904297 390.501433410645 388.244385681152 386.195018005371 392.002566833496 532.562958984375 387.166044616699 393.577992553711 375.705 386.880960388184 380.570556335449 386.013652954102 322.70365447998 364.458463439941 397.17716583252 400.267109069824 409.46503326416 410.546335144043 402.359861755371 383.581131591797 368.595598754883 370.368583374023 377.190936584473 366.165856933594 363.740284423828 354.685657653809 357.763485717773 360.08878326416 362.690222167969 371.17691619873 372.490279541016 365.584630737305 374.760530090332 384.276258544922 391.021479492187 396.694190368652 389.897396850586 392.445812988281 395.713465576172 402.831447143555 399.678631896973 403.298319396973 394.60343170166 390.560830078125 369.394189453125 356.940318603516 353.187031860352 356.29751953125 357.322354431152 356.604084777832 357.210780029297 347.260053405762 340.631119995117 324.313190002441 331.616011047363 325.710845947266 324.694017333984 334.574409484863 337.918469238281 340.052945251465 341.242437744141 340.605016479492 344.004938964844 344.395464477539 346.869376831055 342.738918457031 344.51561920166 344.13663482666 345.922308654785 283.186104125977 297.079458618164 296.891930236816 308.000879516602 316.613649902344 306.621683349609 344.945299987793 363.114283447266 453.542692565918 479.17700958252 526.582897338867 560.12241027832 633.669669799805 1051.96346191406 932.660364990234 586.831201171875 599.253151245117 654.443415527344 624.335185546875 757.93107421875 633.74220703125 340.7426953125 11.5667010498047 7.79267028808594 496.381640625 643.239375 753.516328125 766.8247265625 739.07021484375 744.7822265625 723.6577734375 653.6012109375 6.76771957397461 343.6065234375 569.30021484375 558.71484375 446.440458984375 107.283427734375 0.88608226776123 2.07142707824707 242.809306640625 417.455009765625 518.36865234375 554.627578125 616.82607421875 414.059644775391 515.594042358398 391.76645690918 383.400098876953 500.71286315918 368.073286743164 401.41548248291 367.148757019043 595.67748046875 623.45208984375 549.609823608398 479.758154296875 487.307021484375 493.79970703125 483.765732421875 429.325576171875 206.314453125 173.087856445312 377.194130859375 459.284853515625 514.93271484375 535.548046875 505.61888671875 412.2753515625 371.513583984375 368.814990234375 432.956455078125 494.83939453125 487.355302734375 398.050927734375 532.00564453125 546.16212890625 549.7269140625 532.46056640625 473.76617980957 375.164802246094 393.63225402832 391.426083984375 386.377500915527 374.948995056152 365.2930078125 373.387859802246 380.144765625 441.403447265625 547.31185546875 95.877421875 422.90607421875 507.939375 500.42578125 459.15205078125 382.303037109375 374.7966796875 383.535029296875 380.5040625 385.70841796875 380.402783203125 377.598720703125 -9999 -9999
-9999 -9999 -9999 -9999 -9999 -9999 -9999 -9999 -9999 -9999 -9999 -9999 -9999 -9999 -9999 -9999 243.833232421875 253.363154296875 254.409169921875 244.185322265625 285.742646484375 254.781708984375 260.35154296875 -9999 -9999 -9999 -9999 -9999 -9999 -9999 -9999 299.987644042969 311.772021789551 300.94401763916 309.078586120605 313.303005065918 327.140375976562 326.961298828125 326.117232971191 381.895793151855 325.230106201172 315.253759460449 316.151551208496 315.466515197754 317.913689575195 317.251977539063 330.294792480469 333.275427246094 322.153516845703 312.860816345215 322.394128417969 322.014992980957 304.294391784668 303.872233886719 312.324938964844 314.501923828125 320.401529846191 233.438671875 0.201721515655518 0.237301669120789 349.215615234375 372.393896484375 357.120029296875 353.748801269531 361.436014709473 395.450771484375 364.261611328125 376.665234375 393.971116333008 291.780849609375 370.6430859375 438.5278125 466.246435546875 401.563311767578 351.659553222656 382.289219055176 407.339832458496 411.565520324707 441.873134765625 395.398501281738 367.145161743164 369.111535949707 368.364262390137 347.821762390137 354.453717041016 336.066237487793 345.886506958008 332.308811645508 359.748621826172 466.587894287109 476.599226989746 458.252473754883 497.30007019043 517.969341430664 492.894225769043 500.734102478027 567.45673828125 550.523671875 565.3016015625 578.4444140625 537.795234375 550.87634765625 542.84162109375 528.7714453125 483.035419921875 534.034921875 550.290388183594 466.005066833496 447.712363586426 487.175803527832 457.18612701416 425.271890258789 297.513097229004 413.843142700195 333.984723815918 300.167075500488 292.596935119629 296.069880981445 294.949151916504 297.898909606934 270.399913330078 228.16599609375 211.126420898437 208.632846679688 204.691376953125 201.6160546875 198.767241210937 215.820322265625 288.13601348877 306.608057556152 329.023726501465 344.361535949707 352.545380859375 364.108564453125 378.059501953125 406.59650390625 414.281748046875 415.055712890625 389.549150390625 388.809638671875 377.700791015625 374.015859375 379.37759765625 401.349462890625 403.93072265625 405.299970703125 408.925810546875 415.184150390625 418.211806640625 425.05458984375 424.260263671875 440.325498046875 460.17474609375 471.039228515625 468.542490234375 469.810517578125 475.842421875 475.674755859375 480.283154296875 483.656162109375 479.022392578125 475.887626953125 479.42853515625 467.6122265625 465.730517578125 467.76421875 471.019248046875 480.574541015625 480.3971484375 483.813017578125 492.91212890625 499.2144140625 497.118984375 488.114619140625 475.203544921875 461.655498046875 431.859287109375 411.425888671875 422.6895703125 -9999 -9999 -9999 -9999 -9999 -9999 -9999 -9999 -9999 325.738505859375 350.83412109375 355.087822265625 -9999 -9999 -9999 -9999 -9999 -9999 179.840771484375 -9999 -9999 -9999 -9999 -9999 121.874245605469 64.3543579101563 14.4827252197266 18.6983331298828 -9999 -9999 -9999 -9999 -9999 -9999 -9999 -9999 -9999 30.6863983154297 0.552408428192139 0.645297088623047 0.339259185791016 0.333246946334839 0.337540941238403 0.337479257583618 0.429905118942261 0.421832427978516 0.281059198379517 0.285636320114136 0.245421838760376 0.276601839065552 0.233584513664246 0.209718546867371 -9999 -9999 -9999 -9999 -9999 -9999 -9999 -9999 -9999 -9999 -9999 -9999 -9999 -9999 -9999 -9999 -9999 -9999 -9999 -9999 -9999 -9999 -9999 -9999 -9999 -9999 204.711892089844 10.2249669647217 0.107616963386536 0.108858568668365 0.403594408035278 1.46675090789795 1.61328231811523 1.73237251281738 1.85123371124268 1.9802318572998 2.10308990478516 2.24166778564453 2.35041297912598 2.26945907592773 2.02615493774414 1.82979949951172 1.79872959136963 1.41361633300781 0.212754421234131 0.175622034072876 0.164463829994202 -9999 -9999 -9999 -9999 -9999 -9999 -9999 -9999 -9999 -9999 -9999 -9999 -9999 -9999 -9999 -9999 -9999 -9999 -9999 -9999 -9999 -9999 -9999 -9999 -9999 -9999 -9999 -9999 -9999 -9999 -9999 -9999 -9999 -9999 -9999 -9999 -9999 -9999 -9999 -9999 -9999 103.373041305542 -9999 116.383815994263 107.399606781006 165.015681762695 -9999 -9999 -9999 -9999 -9999 -9999 -9999 -9999 -9999 -9999 -9999 -9999 -9999 -9999 -9999 -9999 -9999 -9999 -9999 -9999 -9999 -9999 -9999 -9999 -9999 -9999 -9999 -9999 -9999 -9999 -9999 -9999 -9999 -9999 -9999 -9999 -9999 -9999 -9999 -9999 -9999 -9999 -9999 -9999 -9999 -9999 -9999 -9999 -9999 -9999 120.465911865234 137.986083984375 116.375651092529 119.141928863525 118.907367324829 122.017469787598 129.540614776611 132.948770141602 144.790642089844 151.006269836426 185.393615722656 161.298198242187 175.890292053223 167.655569458008 155.870240020752 156.691110992432 166.785406951904 178.339400024414 187.507957763672 191.504439239502 174.756058044434 173.33056137085 169.854050445557 157.942946777344 146.300824127197 142.179323730469 -9999 -9999 145.06426071167 117.351013183594 115.247837219238 151.943367919922 169.993405151367 170.787477722168 145.856188201904 143.951900482178 171.220330810547 170.853809051514 167.703652496338 166.186551818848 163.657426300049 164.972375793457 172.881695709229 178.442635803223 192.389783477783 186.728719482422 201.634914550781 208.783999786377 204.137302093506 194.826836700439 205.944759063721 208.452841644287 200.319330596924 191.728146972656 189.775715789795 192.293647613525 197.937173309326 200.313016204834 210.754830322266 185.991491546631 172.822147064209 171.070567932129 170.874851989746 196.656892547607 170.570885009766 198.995121002197 203.865949401855 172.101989135742 173.34178527832 177.351711273193 206.516347503662 217.897012023926 224.192838592529 226.449176330566 200.832926330566 200.503384552002 200.203934326172 198.832955932617 199.327109985352 225.600494842529 227.687416534424 223.407618255615 222.39319152832 191.621482086182 217.612033538818 216.516697998047 186.491582336426 212.14810546875 212.755012207031 210.008191223145 216.843701934814 221.212082977295 220.855773010254 200.56124130249 214.938945922852 214.649133453369 188.968969116211 211.66006942749 212.56163772583 291.070272216797 301.076831359863 286.632040100098 294.85990447998 324.657369689941 347.082555541992 318.216538696289 298.688087768555 300.401130981445 304.378533325195 370.378523254395 360.59242401123 366.699377746582 356.329000854492 354.866901855469 351.301838378906 348.37404510498 347.188842773438 292.480859069824 346.960890197754 347.558612365723 344.121377563477 343.325582885742 343.275581359863 347.24443359375 344.703359069824 297.535816955566 300.426781311035 298.326807861328 303.771173400879 302.637815551758 304.673738708496 299.352095947266 296.785068969727 296.765551757812 301.022569885254 346.743542175293 347.558642578125 304.547873840332 353.298938598633 353.753031005859 308.93311340332 354.043493041992 308.085413818359 311.274121398926 309.408022155762 357.934336853027 319.004508361816 318.438116455078 318.238654174805 371.277946472168 318.657247009277 311.203182678223 360.927691040039 310.921512451172 349.586831359863 297.434393920898 292.902171020508 334.116933288574 282.363752746582 284.51517791748 275.510975646973 274.171448364258 276.077216491699 330.284248352051 335.313404846191 342.753027648926 361.943915405273 362.241145019531 368.853945007324 376.50254699707 384.51200592041 399.482070007324 415.524885864258 415.045415039063 343.691545715332 337.850219421387 395.368591003418 339.195970458984 394.67458190918 389.236017150879 404.59766418457 397.202423400879 408.19130859375 387.071026611328 382.170242614746 383.913045043945 391.69053314209 399.414696350098 399.423186035156 393.907428588867 377.686329345703 371.341211242676 385.761893005371 384.823133239746 367.534780883789 359.271507568359 354.66209197998 352.085729370117 347.50882232666 343.904180603027 338.14210144043 339.628460998535 348.823847351074 360.934579467773 357.759527893066 366.786782226562 384.377137756348 383.911927185059 388.721137390137 391.424905700684 395.19858581543 395.293875732422 396.395117797852 398.284389953613 395.42868347168 389.956552734375 366.236221618652 349.735144042969 342.249235839844 341.574834594727 344.010014648438 348.548672790527 344.737378234863 342.117207641602 330.539271240234 338.740065307617 326.843297424316 324.083908081055 326.176479492188 327.977893981934 337.371836242676 335.504256591797 341.362743530273 344.157934570312 348.04726776123 349.71517364502 349.049805908203 348.731729736328 343.736229858398 338.672449951172 339.868649597168 326.898858032227 333.374826049805 323.583590698242 323.887315979004 316.016018371582 326.330985717773 338.031826171875 285.674065246582 351.699161682129 307.198196411133 302.254420166016 301.387445068359 305.158285217285 314.651082458496 322.095750732422 337.967141418457 366.67550994873 381.064498901367 386.813375244141 530.556613769531 637.3105078125 714.8633203125 681.0273046875 5.56275787353516 3.14572036743164 4.75704620361328 655.6660546875 690.25060546875 557.4659765625 711.30615234375 665.98359375 597.7667578125 476.8611328125 515.50130859375 249.555908203125 407.16884765625 446.111865234375 295.50427734375 593.06419921875 409.823115234375 479.79228515625 1.98564811706543 448.257626953125 528.57421875 650.4601171875 602.7478125 506.41470703125 508.63798828125 430.957924804687 399.324119567871 458.358066101074 419.02611328125 398.114717102051 393.225353393555 473.857470703125 500.2130859375 601.37466796875 625.12962890625 621.1458984375 466.374697265625 424.206298828125 496.7347265625 353.91421875 483.35970703125 425.375361328125 518.54548828125 362.111953125 534.2351953125 407.463076171875 397.42177734375 389.637685546875 503.6851171875 391.5123046875 405.80150390625 520.97443359375 525.548203125 522.47291015625 427.565390625 426.882158203125 394.581044311523 371.397043762207 373.308401184082 387.178915100098 387.525703125 396.16294921875 443.465771484375 414.26865234375 441.293671875 433.7682421875 540.80865234375 433.1984765625 423.44173828125 418.603623046875 416.787802734375 384.985458984375 444.736318359375 420.677021484375 437.557294921875 356.42935546875 367.587802734375 443.29775390625 350.649345703125 351.847265625 366.67388671875 -9999
-9999 -9999 -9999 -9999 -9999 -9999 -9999 -9999 -9999 -9999 -9999 -9999 -9999 -9999 -9999 -9999 -9999 -9999 -9999 -9999 -9999 -9999 -9999 -9999 -9999 -9999 -9999 -9999 -9999 -9999 294.103839111328 296.634641418457 297.742016601563 305.246716918945 313.935894470215 320.385003662109 317.573920898438 317.208229980469 321.426243896484 317.375395202637 316.685948181152 322.343854980469 315.433583679199 320.845108337402 324.399144287109 330.4434375 330.46174621582 323.612715454102 309.435908203125 302.983264160156 305.423731384277 293.499923400879 301.353758239746 313.863837890625 346.481087036133 360.055166015625 0.257710390090942 0.247975988388062 254.44623046875 294.430737304688 295.763225097656 314.440199890137 346.484682312012 357.75140625 378.3561328125 325.537275695801 336.958016967773 333.989225463867 348.517554016113 336.757799377441 340.79293762207 364.843852844238 409.95525970459 442.071357421875 448.802578125 369.345168457031 365.34042388916 382.528350219727 400.604490966797 401.595548400879 401.996920166016 363.589282836914 390.127192382812 403.05662109375 353.615655212402 328.724744567871 332.86855682373 308.562256164551 292.608053283691 316.334608154297 349.372836914062 446.386129760742 496.92544921875 476.526535949707 457.670582885742 537.28546875 537.95080078125 483.524619140625 567.27896484375 587.17400390625 528.12046875 527.18326171875 506.6813671875 487.38486328125 436.52056640625 328.65369140625 502.0930078125 504.058359375 588.3533203125 583.73771484375 490.921567382812 408.539174194336 306.307111816406 349.969562072754 379.141721191406 280.157401428223 265.710011901855 263.297551574707 263.560459899902 262.486439208984 264.68680847168 261.965819091797 213.132451171875 192.965786132812 194.449995117187 194.19064453125 194.366059570313 212.299001312256 192.299677734375 218.504704284668 209.169041748047 228.002078704834 334.366125183105 335.3409375 341.779775390625 348.449736328125 359.91375 351.6364453125 354.196025390625 353.328603515625 354.436767883301 342.697939453125 360.122607421875 366.019833984375 370.635146484375 370.91900390625 376.06833984375 402.693369140625 412.504365234375 420.92748046875 436.022841796875 446.5658203125 449.388369140625 455.98037109375 458.53787109375 461.929072265625 459.895166015625 465.547470703125 469.4859375 475.264658203125 487.814296875 490.55783203125 487.23134765625 463.7042578125 460.540751953125 469.721923828125 469.042353515625 475.751337890625 478.933623046875 490.211015625 494.30279296875 493.17369140625 483.201767578125 478.44216796875 472.8373828125 466.726552734375 459.689736328125 451.105341796875 439.9096875 -9999 -9999 -9999 -9999 -9999 -9999 -9999 -9999 -9999 -9999 -9999 -9999 -9999 303.95525390625 342.6319921875 330.311279296875 329.98166015625 260.37140625 -9999 -9999 -9999 -9999 -9999 -9999 119.739074707031 65.0982568359375 -9999 -9999 -9999 -9999 -9999 -9999 66.5410400390625 -9999 -9999 -9999 -9999 -9999 3.30922325134277 18.9737219238281 15.6988146972656 23.0903466796875 0.843658618927002 0.312094173431396 0.308356103897095 0.370537633895874 0.321447372436523 0.205664649009705 0.393644485473633 0.220567531585693 0.273520488739014 0.214085354804993 -9999 -9999 -9999 -9999 -9999 -9999 -9999 -9999 -9999 -9999 -9999 -9999 -9999 -9999 -9999 -9999 -9999 -9999 -9999 -9999 -9999 -9999 -9999 -9999 -9999 -9999 -9999 -9999 0.760858936309814 0.162506618499756 0.374980087280273 0.967274551391602 1.39438465118408 1.51071384429932 1.6459741973877 1.77482734680176 1.92279006958008 2.0719132232666 2.22676071166992 2.26122276306152 2.07546844482422 1.55866928100586 0.295207328796387 0.162343382835388 0.15887218952179 0.350421190261841 -9999 -9999 -9999 -9999 -9999 -9999 -9999 -9999 -9999 -9999 -9999 -9999 -9999 -9999 -9999 -9999 -9999 -9999 -9999 -9999 -9999 -9999 -9999 -9999 -9999 -9999 -9999 -9999 -9999 -9999 -9999 -9999 -9999 -9999 -9999 -9999 -9999 -9999 -9999 -9999 -9999 -9999 -9999 -9999 -9999 -9999 -9999 -9999 -9999 -9999 -9999 -9999 -9999 -9999 -9999 -9999 -9999 -9999 -9999 -9999 -9999 -9999 -9999 -9999 -9999 -9999 -9999 -9999 -9999 -9999 -9999 -9999 -9999 -9999 -9999 -9999 -9999 -9999 -9999 -9999 -9999 -9999 -9999 -9999 -9999 -9999 -9999 -9999 -9999 -9999 -9999 -9999 -9999 -9999 -9999 109.2828515625 126.565539093018 121.895827102661 132.706104125977 151.263422698975 372.260631103516 361.6390625 182.681330108643 179.174062957764 183.891185760498 188.853603057861 187.411459350586 211.572983398437 196.031787109375 172.358658599854 181.912620849609 170.604858856201 164.436649475098 171.999810791016 177.542366638184 171.109315338135 177.574376678467 169.154467163086 145.810552368164 134.930144805908 136.112053985596 -9999 -9999 -9999 -9999 133.935537414551 118.579759140015 121.73815612793 126.159635467529 135.965312347412 162.348776092529 165.962995147705 166.402963256836 165.937571411133 163.246718902588 164.848550262451 163.449851989746 160.100973358154 157.30365234375 170.997604980469 179.771890869141 184.238643493652 185.414464874268 184.358964385986 181.471882324219 180.28157409668 180.080903320313 167.447526855469 200.186939849854 188.122523345947 185.443725585938 184.979104156494 184.822724761963 183.034059906006 190.650953979492 188.887848815918 166.832855529785 167.223652954102 164.318443450928 195.761064605713 196.103220062256 294.221727905273 204.710522003174 201.66931137085 202.422264862061 205.52025970459 179.488045349121 178.487682495117 181.615406341553 210.000305786133 219.026970977783 197.63313079834 200.04844619751 196.597177734375 198.349149627686 221.533391876221 221.494523620605 199.69485534668 228.721405792236 202.683632354736 193.304902038574 213.806811676025 210.591335906982 201.29213973999 200.22994720459 203.479698944092 205.7305078125 208.305178527832 208.451300811768 188.914390411377 192.136784820557 198.469999237061 201.012478637695 196.006887817383 193.382109832764 210.701958618164 216.303413543701 220.181507720947 313.454067077637 286.369192199707 300.428745117187 377.081114501953 390.483124694824 297.841173706055 309.380830993652 310.471196594238 364.416256713867 299.421070861816 360.22709564209 358.425590515137 348.621907653809 352.318364868164 347.09065246582 342.667828674316 295.304902954102 290.885855712891 289.48451385498 287.54910736084 336.823692626953 332.358631896973 290.035316162109 292.463547363281 296.337623291016 298.208949279785 298.64394744873 299.314179382324 296.149339599609 291.657540893555 292.519833068848 274.969478759766 273.963587036133 274.707778930664 275.800893859863 290.15740447998 294.191092529297 295.625939941406 295.981630554199 345.694990539551 343.313105163574 296.370343322754 298.737001647949 296.425420532227 307.06577545166 354.774149780273 360.889774475098 308.957645874023 310.12278717041 309.853655090332 309.782263183594 310.627424926758 303.624703674316 296.905133056641 344.248420715332 343.350205993652 289.022113037109 283.560405578613 283.50493560791 279.405565795898 279.859930114746 271.571097106934 269.334714660645 270.400003967285 323.811059875488 336.478938903809 352.030652160645 365.578497619629 372.061535339355 378.230756835937 344.746955566406 358.284498596191 396.971389160156 409.978583679199 342.556737670898 396.355146789551 391.186408996582 397.813408813477 388.001961364746 390.597418212891 392.83174621582 388.136557617188 327.787223510742 380.298946838379 367.838566589355 360.182048950195 361.773094482422 345.77194152832 366.296978759766 365.663243408203 381.887937927246 327.478422546387 384.853557128906 377.584996948242 380.941625061035 311.96305480957 348.590365905762 349.683239135742 347.601362915039 350.046392211914 339.618249206543 329.916382141113 342.196424560547 362.249785766602 311.441951293945 363.939565429687 349.876870422363 342.681212768555 359.771190490723 298.068945007324 363.92258605957 309.21502532959 368.254168395996 360.544235229492 352.605624389648 339.304402770996 337.296939697266 339.920040893555 338.302257385254 328.945234680176 329.220530090332 334.996416320801 332.856411437988 334.278599853516 330.623745117188 326.870246887207 320.43941619873 333.58011932373 331.60592010498 337.542626953125 342.45440826416 342.198025817871 349.62236114502 344.129655761719 343.492536621094 334.460068359375 343.76061126709 335.218809814453 329.859703674316 321.383916320801 316.427299804687 323.403343505859 324.210467834473 319.287296447754 295.803316955566 421.126627807617 298.794284362793 327.510477905273 331.728552246094 343.996026306152 355.882884521484 365.255013427734 374.928782958984 378.279851989746 386.536961975098 325.428752746582 346.696803588867 355.980168457031 368.32293182373 389.328920288086 631.28712890625 655.4954296875 1072.9763671875 40.8694299316406 1.02212162017822 1.16853801727295 0.507418727874756 1.43652809143066 451.127080078125 482.50962890625 624.18041015625 622.28625 594.131484375 489.953935546875 468.89619140625 8.66540863037109 281.5855078125 493.37466796875 627.04576171875 581.64076171875 607.54453125 622.87611328125 463.343232421875 524.59623046875 618.78814453125 554.041076660156 370.440579528809 404.434124450684 451.511301269531 306.649176635742 426.211586608887 361.071834411621 359.015971069336 433.626884765625 464.888583984375 614.02646484375 473.68529296875 468.121640625 559.6669921875 243.138046875 6.04784088134766 409.40220703125 426.64412109375 441.858193359375 782.55234375 537.60234375 516.1983984375 451.350843200684 338.409994812012 353.038265991211 348.292501831055 346.611483764648 348.410481262207 352.073100585937 463.923134765625 499.57072265625 502.449609375 484.608896484375 366.481123352051 363.984793395996 363.487436828613 383.609440612793 381.386442260742 435.127177734375 424.373583984375 455.878505859375 507.5558203125 498.65970703125 515.20060546875 417.60990234375 415.818955078125 407.1580078125 402.201298828125 385.394912109375 387.315146484375 394.06400390625 441.819521484375 89.8364721679688 370.22478515625 433.782919921875 446.779365234375 334.8964453125 342.24826171875 343.721337890625 360.469541015625
[truncated: 1,892,501 more chars]
