# Supplementary material for: Assessing the efficiency of changes in land use for mitigating climate change
Source: Springer Nature journal article supplement (doi:10.1038/s41586-018-0757-z), 2018-12-01
Supplement: 41586_2018_757_MOESM5_ESM.xlsx [file 41586_2018_757_MOESM5_ESM.xlsx]

## Sheet: SI Fig 1A
Biome	IPCC	UNEP	Saugier	Malhi	LPJmL	HYBRID	JEDI	SDGVM
Trop. Rainfor.	193	170-250	194	121	175	60	99	81
Trop. Seas./Decid. For.	105				105	20	93	29
Temp. Decid. For.	89	90-192	134	57	69	155	35	28
Bor. Evergr. For.	33	60-100	42	64	85	89	21	53
Tropical Savannas		9 - 80	29		48	8	73	19
Temperate Savannas		1 - 7	4		7	24	43	12
Tundra	10	40	4		3	35	5	7
Biome	IPCC	UNEP	Saugier	Malhi	LPJmL	HYBRID	JEDI	SDGVM
Trop. Rainfor.	193	210	194	121	175	60	99	81
Trop. Seas./Decid. For.	105				105	20	93	29
Temp. Decid. For.	89	141	134	57	69	155	35	28
Bor. Evergr. For.	33	80	42	64	85	89	21	53
Tropical Savannas		44.5	29		48	8	73	19
Temperate Savannas		4	4		7	24	43	12
Tundra	10	40	4		3	35	5	7
Biome	Reference	LPJmL	HYBRID	JEDI	SDGVM	Mean DGVM	Area	weight
Trop. Rainfor.	179.5	175	60	99	81	103.75	1990.73	0.277173		103.75
Trop. Seas./Decid. For.	105	105	20	93	29	61.75	856.39	0.119237		61.75
Temp. Decid. For.	105.25	69	155	35	28	71.75	147.854	0.0205859		71.75
Bor. Evergr. For.	54.75	85	89	21	53	62	1686.25	0.23478		62
Tropical Savannas	36.75	48	8	73	19	37	798.085	0.111119		37
Temperate Savannas	4	7	24	43	12	21.5	272.656	0.0379624		21.5
Tundra	7	3	35	5	7	12.5	1430.3	0.199143		12.5
Deviation		LPJmL	HYBRID	JEDI	SDGVM
Trop. Rainfor.		-2.50696	-66.5738	-44.8468	-54.8747
Trop. Seas./Decid. For.		0	-80.9524	-11.4286	-72.381
Temp. Decid. For.		-34.4418	47.2684	-66.7458	-73.3967
Bor. Evergr. For.		55.2511	62.5571	-61.6438	-3.19635
Tropical Savannas		30.6122	-78.2313	98.6395	-48.2993
Temperate Savannas		75	500	975	200
Tundra		-57.1429	400	-28.5714	0
weighted average		6.43719	77.5006	12.6444	-23.8761
Biome	Reference	LPJmL	HYBRID	JEDI	SDGVM	Mean
Trop. Rainfor.	179.5	175	60	99	81	52.8929
Trop. Seas./Decid. For.	105	105	20	93	29	44.4167
Temp. Decid. For.	105.25	69	155	35	28	40.95
Bor. Evergr. For.	54.75	85	89	21	53	33.25
Tropical Savannas	36.75	48	8	73	19	23.6667
Temperate Savannas	4	7	24	43	12	17
Tundra	7	3	35	5	7	12.5

## Sheet: SI Fig 1B
		Original data
	Biome	UNEP	Malhi	Jobbagy	lpj	hybrid	jedi	sdgvm
1	Trop. Rainfor.	90 - 200	123	186	112	7	155	51
4	Temp. Decid. For.	60 - 128	96	174	97	49	184	106
7	Bor. Evergr. For.	116 - 343	343	93	224	180	131	152
9	Tropical Savannas	< 174		132	72	5	115	63
12	Temperate Savannas	133		117	108	65	146	126
15	Tundra	218		142	187	290	42	119
		Average values
		145	123	186
		94	96	174
		229.5	343	93
				132
		133		117
		218		142
	Data for plot using average estimates for biomes from the literature
		Reference	LPJmL	HYBRID	JEDI	SDGVM	Mean DGVM
	Tropical Rainforest	151.333	112	7	155	51	81.25
	Temperate Deciduous Forest	121.333	97	49	184	106	109
	Boreal Evergreen Forest	221.833	224	180	131	152	171.75
	Tropical Savannas	132	72	5	115	63	63.75
	Temperate Savannas	125	108	65	146	126	111.25
	Tundra	180	187	290	42	119	159.5
