# Supplementary material for: Assessing the efficiency of changes in land use for mitigating climate change
Source: Springer Nature journal article supplement (doi:10.1038/s41586-018-0757-z), 2018-12-01
Supplement: 41586_2018_757_MOESM6_ESM.xlsx [file 41586_2018_757_MOESM6_ESM.xlsx]

## Sheet: Figs 1
	Net GHG benefit (Mg CO2eq/ ha/ yr)
	Main data					Error bars
	Carbon benefit	Net avoided emissions	Net GHG benefit - main product	Net GHG benefit - co-product		Min	Neg. diff	Max	Pos diff
Reforestation tropical rainforest (5 ton C/ha/yr)			18.3		5.32484
Sugarcane ethanol Brazil			9.63376			9.63376		9.63376
Soybean Brazil	16.3893	-0.109866	16.2794			10.4742	5.80518	21.9943	5.71494
Beef Brazil Cardoso Syst. 5 (220 kg CW/ha/yr)	31.863	1.80114	33.6642			22.5564	11.1078	44.7054	11.0412
Beef Brazil Cardoso Syst. 4 (200 kg CW/ha/yr)	29.0279	0.854248	29.8821			19.7627	10.1194	39.9409	10.0588
Beef Brazil Cardoso Syst. 3 (140 kg CW/ha/yr)	20.1483	0.802933	20.9512			13.9273	7.02389	27.933	6.98181
Beef Brazil Cardoso Syst. 2 (75 kg CW/ha/yr)	10.7505	-0.759308	9.99122			6.24348	3.74775	13.7165	3.72529
Beef Brazil Cardoso Syst. 1 (30 kg CW/ha/yr)	4.49018	-1.05346	3.43672			1.8714	1.56532	4.99267	1.55595
