# Supplementary material for: Assessing the efficiency of changes in land use for mitigating climate change
Source: Springer Nature journal article supplement (doi:10.1038/s41586-018-0757-z), 2018-12-01
Supplement: 41586_2018_757_MOESM9_ESM.xlsx [file 41586_2018_757_MOESM9_ESM.xlsx]

## Sheet: ExFig 1
Crop products
	Main data																				Error bars
	Example system												Reference system			Comparison with alternative land use
	Land efficiency	GHG emissions balance								GHG benefit of example			Global average			C benefit alt. land use		Example system vs alt. land use			Net GHG benefit		Benefit series		Diff series
	Crop yield	Organic soils emis-sions	Recurring emissions		Marginal fertilizer-related em. for add. yield	Soil carbon stock changes		On-site C oppor-tunity cost	Net incl on-site COC	Carbon benefit	Net avoided emissions	Net GHG benefit	Carbon oppor-tunity cost (C "loss")	Organic soils emis-sions	Recur-ring emis-sions	Foregone or potential carbon sequestration (carbon loss or carbon sequestration in regrowth)		Per land area	Per output	Ratio	Min	Max	Neg. diff	Pos diff	Neg. diff	Pos diff
	Mg (fresh weight)/ ha/ year	kg CO2 eq/ kg (fresh weight)	kg CO2 eq/ kg (fresh weight)	Of which fertilizer prod. and application	kg CO2 eq/ kg (fresh weight)	Mg C/ ha/ yr	Mg CO2/ ha/ yr	kg COC-CO2/ kg (fresh weight)	kg CO2 eq/ kg (fresh weight)	Mg CO2/ ha/ yr	Mg CO2 eq/ ha/ yr	Mg CO2eq/ ha/ yr	kg COC-CO2/ kg (fresh weight)	kg CO2 eq/ kg (fresh weight)	kg CO2 eq/ kg (fresh weight)	Mg C / ha / year	Mg CO2/ ha/ yr	Mg CO2eq/ ha/ yr	kg CO2 eq/ kg (fresh weight)		kg CO2 eq/ kg (fresh weight)	kg CO2 eq/ kg (fresh weight)	kg CO2 eq/ kg (fresh weight)	kg CO2 eq/ kg (fresh weight)	kg CO2 eq/ kg (fresh weight)	kg CO2 eq/ kg (fresh weight)
Cereals
Maize Iowa
2013-15 avg yield	11.1	0	0.43	0.25		0	0	1.15616	1.58616	23.4469	0.352991	23.7999	2.00133	0.111006	0.461801	3.5	12.8333	10.9666	0.987979	0.854537	15.4866	32.0893	8.31329	8.2894
Higher yield (+ 1 ton/ha/yr)	12.1	0	0.531138	0.351138	1.47377	0	0	1.06061	1.59174	25.5592	-0.838976	24.7203	2.00133	0.111006	0.461801	3.5	12.8333	11.8869	0.982391	0.926254	15.658	33.7565	9.06223	9.0362
Difference (intensification benefit)									-0.00558774			0.920367						0.920367	-0.00558774
Maize West Africa																									1.3481
Current (unfertilized)	1.8	0	0.06			0	0	3.05556	3.11556	3.8022	0.723242	4.52544	2.00133	0.111006	0.461801	1.5	5.5	-0.974558	-0.541421	-0.177192	3.17734	5.86967			4.49367	1.34423
Fertilized (100 kg N/ha/yr)	6	0	0.3			0	0	0.916667	1.21667	12.674	0.970806	13.6448	2.00133	0.111006	0.461801	1.5	5.5	8.14481	1.35747	1.48087	9.15114	18.1256				4.48076
Difference (intensification benefit)									1.89889			9.11937						9.11937	1.89889
Rice (rough) global averages
Upland rainfed	3.1	0	0.2			0	0	5.08602	5.28602	8.08721	6.11968	14.2069	2.36514	0.243635	2.17409	4.3	15.7667	-1.55978	-0.503154	-0.0989288	11.41	16.9643			2.79691	2.75737
Lowland irrigated	7.8	0	2			0	0	1.73932	3.73932	20.3485	1.35791	21.7064	2.36514	0.243635	2.17409	3.7	13.5667	8.1397	1.04355	0.599978	14.669	28.6443	7.03738	6.9379
Difference (intensification benefit)									1.54671			7.49948						9.69948	1.54671
Organic and conventional winter wheat Sweden - 2013-15 avg yields
Conventional	6.47	0	0.4			0	0	1.75683	2.15683	12.277	1.86683	14.1438	1.7855	0.112028	0.688537	3.1	11.3667	2.77714	0.429233	0.244323	9.94579	18.998			4.19801	4.85422
Organic	3.42	0	0.3			0	0	3.32359	3.62359	6.48953	1.32879	7.81832	1.7855	0.112028	0.688537	3.1	11.3667	-3.54834	-1.03753	-0.312171	5.59928	10.3842			2.21904	2.56591
Difference (intensification benefit)									-1.46676			-6.32548						-6.32548	-1.46676
Other crops
Soybean Iowa
2013-15 average yield	3.46	0	0.39			0	0	3.70906	4.09906	20.2524	-0.447162	19.8053	5.6874	0.165907	0.260762	3.5	12.8333	6.97194	2.01501	0.543268
Maize-soybean rotation Iowa
2013-15 average yields (see above)												21.8026					12.8333	8.96925
Soybean Brazil
2012-14 average yield	2.8	0	0.3			0	0	4.58333	4.88333	16.3893	-0.109866	16.2794	5.6874	0.165907	0.260762	3.5	12.8333	3.44606	1.23074	0.268524
Organic and conventional peas Sweden - 2013-15 avg yields
Conventional	3.6	0	0.23			0	0	3.15741	3.38741	13.3774	0.889215	14.2666	3.71594	0	0.477004	3.1	11.3667	2.89993	0.805537	0.255126	9.24672	33.5553			5.01988	19.2887
Organic	2.4	0	0.23			0	0	4.73611	4.96611	8.91826	0.59281	9.51107	3.71594	0	0.477004	3.1	11.3667	-1.8556	-0.773167	-0.163249	6.16448	22.3702			3.34659	12.8591
Difference (intensification benefit)									-1.5787			-4.75553						-4.75553	-1.5787
