# Supplementary material for: Assessing the efficiency of changes in land use for mitigating climate change
Source: Springer Nature journal article supplement (doi:10.1038/s41586-018-0757-z), 2018-12-01
Supplement: 41586_2018_757_MOESM10_ESM.xlsx [file 41586_2018_757_MOESM10_ESM.xlsx]

## Sheet: ExFig 2
	Mg CO2eq per ha per year
	Main data				Error bars
	Carbon benefit	Net avoided production emissions	Net GHG benefit - main product	Net GHG benefit - co-product	Min	Neg. diff	Max	Pos diff
Grass ethanol (grass yield 32 ton DM/ha/yr soil C seq. 0.6 ton/ha/yr)	21.8
Grass ethanol (grass yield 10 ton DM/ha/yr soil C seq. 0.6 ton/ha/yr)	8.2
Grass ethanol (grass yield 17 ton DM/ha/yr soil C seq. 0.6 ton/yr)	12.4578				12.4578		12.4578
Maize ethanol Iowa (solid fill: ethanol; pattern fill: DDGS)			1.67231	7.68071	6.66749	2.68554	12.0119	2.65889
Maize-soybean rotation Iowa	21.8497	-0.0470858	21.8026	0	14.0592	7.74341	29.4783	7.67572
